# Supplementary material for: Invariable Ribosome Stoichiometry During Murine Erythroid Differentiation: Implications for Understanding Ribosomopathies
Source: Front Mol Biosci. 2022 Feb 3;9:805541. doi: 10.3389/fmolb.2022.805541 (PMC8850788; doi:10.3389/fmolb.2022.805541)
Supplement: Supplementary file 5 [file DataSheet2.xlsx]

## Sheet: Definitions
MaxQuant analysis of the 1st biological replication of the proteomics experiment
Comparison between control and H48 samples
Control sample = C0
H48 sample = H0
Majority protein IDs	These are the IDs of those proteins that have at least half of the peptides that the leading protein has
Peptide counts (all)	Number of peptides associated with each protein in protein group, occurring in the order as the protein IDs occur in the 'Protein IDs' column. Here distinct peptide sequences are counted. Modified forms or different charges are counted as one peptide.
Peptide counts (razor+unique)	Number of peptides associated with each protein in protein group, occurring in the order as the protein IDs occur in the 'Protein IDs' column. Here distinct peptide sequences are counted. Modified forms or different charges are counted as one peptide.
Peptide counts (unique)	Number of peptides associated with each protein in protein group, occurring in the order as the protein IDs occur in the 'Protein IDs' column. Here distinct peptide sequences are counted. Modified forms or different charges are counted as one peptide.
Protein names	Names of proteins contained within the group
Gene names	Names of the genes associated to the proteins contained within the group.
Fasta headers	Fasta headers(s) of protein(s) contained within the group
Number of proteins	Number of proteins contained within the group. This corresponds to the number of entries in the column 'Protein IDs'.
Peptides	The total number of peptide sequences associated with the protein group (i.e. for all the proteins in the group).
Razor + unique peptides	The total number of razor + unique peptides associated with the protein group (i.e. these peptides are shared with another protein group).
Unique peptides	The total number of unique peptides associated with the protein group (i.e. these peptides are not shared with another protein group).
Peptides C0	Number of peptides (distinct peptide sequences) in experiment C0
Peptides H0	Number of peptides (distinct peptide sequences) in experiment H1
Razor + unique peptides C0	Number of razor + unique peptides (distinct peptide sequences) in experiment C0
Razor + unique peptides H0	Number of razor + unique peptides (distinct peptide sequences) in experiment H0
Unique peptides C0	Number of unique peptides (distinct peptide sequences) in experiment C0
Unique peptides H0	Number of unique peptides (distinct peptide sequences) in experiment H0
Mol. weight [kDa]	Molecular weight of the leading protein sequence contained in the protein group.
Intensity C0	Summed up eXtracted Ion Current (XIC) of all isotopic clusters associated with the identified AA sequence.
Intensity H0	Summed up eXtracted Ion Current (XIC) of all isotopic clusters associated with the identified AA sequence.

## Sheet: proteinGroups
Protein IDs	Majority protein IDs	Peptide counts (all)	Peptide counts (razor+unique)	Peptide counts (unique)	Protein names	Gene names	Fasta headers	Number of proteins	Peptides	Razor + unique peptides	Unique peptides	Peptides C0	Peptides H0	Razor + unique peptides C0	Razor + unique peptides H0	Unique peptides C0	Unique peptides H0	Sequence coverage [%]	Unique + razor sequence coverage [%]	Unique sequence coverage [%]	Mol. weight [kDa]	Sequence length	Sequence lengths	Q-value	Score	Identification type C0	Identification type H0	Sequence coverage C0 [%]	Sequence coverage H0 [%]	Intensity	Intensity C0	Intensity H0	iBAQ	iBAQ C0	iBAQ H0	LFQ intensity C0	LFQ intensity H0	MS/MS count C0	MS/MS count H0	MS/MS count	Only identified by site	Reverse	Potential contaminant	id	Peptide IDs	Peptide is razor	Mod. peptide IDs	Evidence IDs	MS/MS IDs
A2AG58	A2AG58	5	5	5	Uncharacterized protein CXorf23 homolog		sp|A2AG58|BCLA3_MOUSE BCLAF1 and THRAP3 family member 3 OS=Mus musculus OX=10090 GN=Bclaf3 PE=1 SV=1	1	5	5	5	1	5	1	5	1	5	8.2	8.2	8.2	90.11	752	752	0	33.441	By matching	By MS/MS	1.2	8.2	56335000	5531800	50803000	1444500	141840	1302600	0	33939000	0	4	4				0	90;880;922;2739;4445	True;True;True;True;True	95;943;985;2916;4750	223;2307;2424;2425;7447;12249	192;2007;2110;6669;10871
A2BE28	A2BE28	2	2	2	Ribosomal biogenesis protein LAS1L	Las1l	sp|A2BE28|LAS1L_MOUSE Ribosomal biogenesis protein LAS1L OS=Mus musculus OX=10090 GN=Las1l PE=1 SV=1	1	2	2	2	1	2	1	2	1	2	3.4	3.4	3.4	89.413	776	776	0	12.193	By matching	By MS/MS	2.2	3.4	14630000	3441300	11188000	356820	83933	272890	0	7474600	0	1	1				1	1443;2479	True;True	1537;2638	3743;6732;6733	3267;5984
B2RQC6	B2RQC6	3	3	3	CAD protein;Glutamine-dependent carbamoyl-phosphate synthase;Aspartate carbamoyltransferase;Dihydroorotase	Cad	sp|B2RQC6|PYR1_MOUSE CAD protein OS=Mus musculus OX=10090 GN=Cad PE=1 SV=1	1	3	3	3	3	3	3	3	3	3	2.1	2.1	2.1	243.24	2225	2225	0	21.44	By MS/MS	By MS/MS	2.1	2.1	43772000	21235000	22536000	409080	198460	210620	21885000	14406000	2	1	3				2	1576;2335;3971	True;True;True	1676;2483;4251	4081;4082;6352;6353;10959;10960	3569;5646;5647;9698
C0HKE9;C0HKE8;C0HKE7;C0HKE6;C0HKE5;C0HKE4;C0HKE3;C0HKE2;C0HKE1;Q8CGP6;Q8R1M2;Q93077;Q8CGP7;Q8CGP5;Q8BFU2;Q7L7L0;P04908;Q99878;Q96KK5;Q64523;Q16777;Q6GSS7;Q6FI13;P20671;P0C0S8;Q96QV6;P27661;Q9LD28;Q8IUE6;Q64522;O81826;Q9LHQ5;Q9C681;Q9C944;Q9S9K7;O04848;Q9FJE8;Q94F49	C0HKE9;C0HKE8;C0HKE7;C0HKE6;C0HKE5;C0HKE4;C0HKE3;C0HKE2;C0HKE1;Q8CGP6;Q8R1M2;Q93077;Q8CGP7;Q8CGP5;Q8BFU2;Q7L7L0;P04908;Q99878;Q96KK5;Q64523;Q16777;Q6GSS7;Q6FI13;P20671;P0C0S8;Q96QV6;P27661	4;4;4;4;4;4;4;4;4;4;4;4;4;4;4;4;4;3;3;3;3;3;3;3;3;2;2;1;1;1;1;1;1;1;1;1;1;1	4;4;4;4;4;4;4;4;4;4;4;4;4;4;4;4;4;3;3;3;3;3;3;3;3;2;2;1;1;1;1;1;1;1;1;1;1;1	3;3;3;3;3;3;3;3;3;3;3;3;3;3;3;3;3;2;2;2;2;2;2;2;2;1;1;0;0;0;0;0;0;0;0;0;0;0	Histone H2A type 1-H;Histone H2A.J;Histone H2A type 1-C;Histone H2A type 1-K;Histone H2A type 1-F;Histone H2A type 3;Histone H2A type 1-B/E;Histone H2A type 1-J;Histone H2A type 2-C;Histone H2A type 2-A;Histone H2A type 1-D;Histone H2A type 1;Histone H2A type 1-A;Histone H2AX	Hist1h2ah;H2afj;HIST1H2AC;Hist1h2ak;Hist1h2af;Hist3h2a;HIST3H2A;HIST1H2AB;HIST1H2AJ;HIST1H2AH;Hist2h2ac;HIST2H2AC;Hist2h2aa1;HIST2H2AA3;HIST1H2AD;HIST1H2AG;HIST1H2AA;H2afx	sp|C0HKE9|H2A1P_MOUSE Histone H2A type 1-P OS=Mus musculus OX=10090 GN=Hist1h2ap PE=1 SV=1;sp|C0HKE8|H2A1O_MOUSE Histone H2A type 1-O OS=Mus musculus OX=10090 GN=Hist1h2ao PE=1 SV=1;sp|C0HKE7|H2A1N_MOUSE Histone H2A type 1-N OS=Mus musculus OX=10090 GN=His	38	4	4	3	2	3	2	3	1	2	35.4	35.4	28.5	14.135	130	130;130;130;130;130;130;130;130;130;128;129;130;130;130;130;130;130;128;128;129;129;130;130;130;130;131;143;130;130;130;131;132;132;134;142;142;150;150	0	43.603	By MS/MS	By MS/MS	15.4	32.3	3204900000	290580000	2914300000	640980000	58117000	582870000	0	1946900000	2	4	6				3	166;1681;2977;4494	True;True;True;True	179;1788;3197;4802	441;442;4365;8215;12365;12366	383;384;3836;7321;10964;10965
Q6IFZ6;CON__Q9R0H5;Q6IFZ9;Q9R0H5	Q6IFZ6	7;3;3;3	2;0;0;0	0;0;0;0	Keratin, type II cytoskeletal 1b	Krt77	sp|Q6IFZ6|K2C1B_MOUSE Keratin, type II cytoskeletal 1b OS=Mus musculus OX=10090 GN=Krt77 PE=1 SV=1	5	7	2	0	7	5	2	1	0	0	10.5	4.2	0	61.358	572	572;572;524;495;524	0	11.832	By MS/MS	By matching	10.5	7.5	20677000	18589000	2088600	590780	531100	59673	18589000	0	2	0	2			+	26	1090;1091;1181;3040;3583;3604;3983	False;False;False;False;True;True;False	1159;1160;1261;3265;3851;3873;4264	2819;2820;2821;2822;3063;3064;3065;8424;8425;8426;8427;9916;10002;10003;10993;10994	2451;2452;2453;2454;2687;2688;2689;2690;2691;7514;7515;7516;7517;8781;8859;9726;9727
E9PVX6;P46013	E9PVX6	5;1	5;1	5;1		Mki67	sp|E9PVX6|KI67_MOUSE Proliferation marker protein Ki-67 OS=Mus musculus OX=10090 GN=Mki67 PE=1 SV=1	2	5	5	5	5	4	5	4	5	4	1.9	1.9	1.9	350.86	3177	3177;3256	0	33.795	By MS/MS	By MS/MS	1.9	1.5	132250000	67929000	64318000	881640	452860	428780	63033000	47864000	2	3	5				29	390;1648;3026;3520;4189	True;True;True;True;True	424;1751;3250;3783;4482	1050;4249;4250;8379;8380;9770;9771;11583;11584	910;3720;3721;7478;8664;10272
E9Q557	E9Q557	12	12	12	Desmoplakin	Dsp	sp|E9Q557|DESP_MOUSE Desmoplakin OS=Mus musculus OX=10090 GN=Dsp PE=1 SV=1	1	12	12	12	12	8	12	8	12	8	5.1	5.1	5.1	332.91	2883	2883	0	88.426	By MS/MS	By MS/MS	5.1	3.3	228060000	160920000	67146000	1382200	975250	406950	149830000	55943000	11	2	13				30	213;488;1177;1356;1492;1618;1809;2028;2579;2718;3304;4675	True;True;True;True;True;True;True;True;True;True;True;True	233;526;1257;1447;1586;1720;1926;2159;2743;2895;3546;4992	594;595;1272;3055;3056;3529;3530;3879;3880;4175;4176;4177;4178;4786;4787;5429;5430;7016;7393;9101;12780;12781	527;1104;2682;3089;3090;3403;3649;3650;3651;4231;4812;6254;6624;8098;11325
E9Q5C9	E9Q5C9	2	2	2		Nolc1	sp|E9Q5C9|NOLC1_MOUSE Nucleolar and coiled-body phosphoprotein 1 OS=Mus musculus OX=10090 GN=Nolc1 PE=1 SV=1	1	2	2	2	2	2	2	2	2	2	4	4	4	73.697	702	702	0	11.648	By MS/MS	By MS/MS	4	4	67964000	35538000	32427000	2265500	1184600	1080900	0	21663000	1	1	2				31	172;4536	True;True	186;4847	456;457;12459;12460	400;11046;11047
P16381;Q62167;O00571;Q62095	P16381;Q62167;O00571;Q62095	8;8;8;6	7;7;7;5	7;7;7;5	Putative ATP-dependent RNA helicase Pl10;ATP-dependent RNA helicase DDX3X;ATP-dependent RNA helicase DDX3Y	D1Pas1;Ddx3x;DDX3X;Ddx3y	sp|P16381|DDX3L_MOUSE Putative ATP-dependent RNA helicase Pl10 OS=Mus musculus OX=10090 GN=D1Pas1 PE=1 SV=1;sp|Q62167|DDX3X_MOUSE ATP-dependent RNA helicase DDX3X OS=Mus musculus OX=10090 GN=Ddx3x PE=1 SV=3;sp|O00571|DDX3X_HUMAN ATP-dependent RNA helicase	4	8	7	7	6	8	5	7	5	7	17.3	15.6	15.6	73.14	660	660;662;662;658	0	55.935	By MS/MS	By MS/MS	13.9	17.3	292240000	140650000	151590000	7305900	3516100	3789800	165680000	76242000	5	6	11				32	640;1322;1736;2132;2419;2914;3511;3688	True;True;True;True;True;False;True;True	684;1413;1849;2268;2574;3113;3771;3959	1678;3459;3460;4563;4564;5716;5717;6584;6585;8009;8010;9727;10203;10204	1452;3030;4017;4018;5080;5081;5848;5849;7150;8623;9035;9036
O08585	O08585	3	3	3	Clathrin light chain A	Clta	sp|O08585|CLCA_MOUSE Clathrin light chain A OS=Mus musculus OX=10090 GN=Clta PE=1 SV=2	1	3	3	3	2	3	2	3	2	3	11.1	11.1	11.1	25.604	235	235	0	18.502	By matching	By MS/MS	7.2	11.1	110560000	7401500	103150000	15794000	1057400	14736000	17045000	59270000	0	3	3				33	2407;2720;3785	True;True;True	2562;2897;4057	6564;7396;7397;7398;10476;10477	5830;6626;6627;9266
O08709	O08709	3	3	3	Peroxiredoxin-6	Prdx6	sp|O08709|PRDX6_MOUSE Peroxiredoxin-6 OS=Mus musculus OX=10090 GN=Prdx6 PE=1 SV=3	1	3	3	3	2	3	2	3	2	3	21.4	21.4	21.4	24.87	224	224	0	22.957	By matching	By MS/MS	16.5	21.4	53110000	4917900	48193000	3540700	327860	3212800	5893200	31220000	0	3	3				34	2507;2679;4522	True;True;True	2668;2856;4832	6802;6803;7317;12427;12428	6044;6559;11017
O08756	O08756	3	3	3	3-hydroxyacyl-CoA dehydrogenase type-2	Hsd17b10	sp|O08756|HCD2_MOUSE 3-hydroxyacyl-CoA dehydrogenase type-2 OS=Mus musculus OX=10090 GN=Hsd17b10 PE=1 SV=4	1	3	3	3	2	3	2	3	2	3	21.8	21.8	21.8	27.418	261	261	0	18.844	By matching	By MS/MS	17.2	21.8	32349000	1795100	30554000	2310700	128220	2182400	3033200	19174000	0	3	3				35	1595;3000;4542	True;True;True	1696;3222;4853	4131;4132;8284;12472;12473	3612;7389;11055
O08784	O08784	2	2	2	Treacle protein	Tcof1	sp|O08784|TCOF_MOUSE Treacle protein OS=Mus musculus OX=10090 GN=Tcof1 PE=1 SV=1	1	2	2	2	2	1	2	1	2	1	2	2	2	135	1320	1320	0	14.824	By MS/MS	By matching	2	0.7	24895000	18463000	6431900	388980	288480	100500	18463000	0	1	0	1				36	417;1527	True;True	451;1626	1098;3967;3968	950;3475
O08810;F4JWP9;Q9LNC5	O08810	9;1;1	9;1;1	9;1;1	116 kDa U5 small nuclear ribonucleoprotein component	Eftud2	sp|O08810|U5S1_MOUSE 116 kDa U5 small nuclear ribonucleoprotein component OS=Mus musculus OX=10090 GN=Eftud2 PE=1 SV=1	3	9	9	9	8	9	8	9	8	9	12.3	12.3	12.3	109.36	971	971;973;987	0	56.198	By MS/MS	By MS/MS	11	12.3	163080000	52769000	110310000	3197700	1034700	2163000	54934000	71529000	2	6	8				37	126;701;1503;1766;1915;2063;3515;3842;4629	True;True;True;True;True;True;True;True;True	136;754;1601;1882;2036;2195;3775;4115;4944	337;338;1860;1861;3907;3908;4664;4665;5089;5090;5534;5535;9744;10597;10598;12692;12693	295;1619;3423;4121;4499;4913;8639;9367;11251
Q6A068;O08837	Q6A068;O08837	2;2	2;2	2;2	Cell division cycle 5-like protein	Cdc5l	sp|Q6A068|CDC5L_MOUSE Cell division cycle 5-like protein OS=Mus musculus OX=10090 GN=Cdc5l PE=1 SV=2;sp|O08837|CDC5L_RAT Cell division cycle 5-like protein OS=Rattus norvegicus OX=10116 GN=Cdc5l PE=1 SV=2	2	2	2	2	2	2	2	2	2	2	3.1	3.1	3.1	92.188	802	802;802	0	11.245	By MS/MS	By MS/MS	3.1	3.1	24691000	12965000	11726000	649770	341180	308590	12625000	8173400	1	1	2				38	2475;3337	True;True	2634;3581	6723;6724;9182;9183	5979;8163
O08992	O08992	2	2	2	Syntenin-1	Sdcbp	sp|O08992|SDCB1_MOUSE Syntenin-1 OS=Mus musculus OX=10090 GN=Sdcbp PE=1 SV=1	1	2	2	2	1	2	1	2	1	2	12	12	12	32.379	299	299	0	13.203	By MS/MS	By MS/MS	4.3	12	31263000	11550000	19713000	3473600	1283300	2190300	0	13169000	1	2	3				39	3555;3661	True;True	3821;3930	9846;10136;10137	8725;8981;8982
O09061	O09061	4	4	4	Proteasome subunit beta type-1	Psmb1	sp|O09061|PSB1_MOUSE Proteasome subunit beta type-1 OS=Mus musculus OX=10090 GN=Psmb1 PE=1 SV=1	1	4	4	4	1	4	1	4	1	4	26.7	26.7	26.7	26.372	240	240	0	32.189	By matching	By MS/MS	7.1	26.7	44217000	6373500	37843000	3401300	490270	2911000	0	25281000	0	3	3				40	160;310;728;4093	True;True;True;True	171;338;782;4380	417;844;1921;11322;11323	361;727;1666;10036
O09167	O09167	15	15	15	60S ribosomal protein L21	Rpl21	sp|O09167|RL21_MOUSE 60S ribosomal protein L21 OS=Mus musculus OX=10090 GN=Rpl21 PE=1 SV=3	1	15	15	15	15	10	15	10	15	10	63.1	63.1	63.1	18.562	160	160	0	174.72	By MS/MS	By MS/MS	63.1	44.4	61261000000	27848000000	33413000000	10210000000	4641400000	5568800000	26735000000	21474000000	32	24	56				41	903;904;987;1331;1660;1968;2067;2133;2134;2151;3715;4010;4557;4558;4709	True;True;True;True;True;True;True;True;True;True;True;True;True;True;True	966;967;1052;1053;1422;1763;1764;2096;2199;2269;2270;2288;2289;3987;4291;4868;4869;5031;5032	2378;2379;2380;2381;2587;2588;2589;2590;3478;3479;4280;4281;4282;4283;4284;4285;4286;4287;5283;5284;5540;5541;5718;5719;5720;5767;5768;5769;5770;5771;5772;5773;5774;10278;11068;11069;11070;11071;12506;12507;12508;12509;12510;12511;12512;12513;12877;12878;12879;12880;12881;12882	2067;2068;2069;2070;2249;2250;2251;2252;3046;3747;3748;3749;3750;3751;3752;3753;3754;4687;4688;4918;4919;5082;5083;5084;5130;5131;5132;5133;5134;5135;5136;5137;5138;5139;9100;9808;9809;9810;9811;11088;11089;11090;11091;11092;11093;11094;11095;11096;11097;11098;11099;11100;11101;11102;11415;11416;11417;11418;11419
O35129	O35129	6	6	6	Prohibitin-2	Phb2	sp|O35129|PHB2_MOUSE Prohibitin-2 OS=Mus musculus OX=10090 GN=Phb2 PE=1 SV=1	1	6	6	6	4	6	4	6	4	6	27.1	27.1	27.1	33.296	299	299	0	54.517	By MS/MS	By MS/MS	17.7	27.1	483000000	166120000	316880000	21955000	7550800	14404000	175010000	202810000	3	7	10				42	1075;1836;1982;2052;2068;4377	True;True;True;True;True;True	1144;1953;2110;2184;2200;4677	2786;4842;4843;4844;4845;5314;5315;5316;5317;5505;5506;5542;12072;12073	2418;4275;4276;4277;4717;4718;4884;4885;4920;10713;10714
O35286;Q9LZQ9;O22899	O35286	9;1;1	9;1;1	9;1;1	Pre-mRNA-splicing factor ATP-dependent RNA helicase DHX15	Dhx15	sp|O35286|DHX15_MOUSE Pre-mRNA-splicing factor ATP-dependent RNA helicase DHX15 OS=Mus musculus OX=10090 GN=Dhx15 PE=1 SV=2	3	9	9	9	6	9	6	9	6	9	14.1	14.1	14.1	91.006	795	795;726;729	0	54.695	By MS/MS	By MS/MS	9.7	14.1	253470000	50227000	203240000	6499300	1287900	5211400	67722000	118280000	0	8	8				43	393;1050;1249;1815;1886;3671;3898;3918;3958	True;True;True;True;True;True;True;True;True	427;1119;1336;1932;2005;3941;4176;4196;4238	1054;2732;2733;3251;4802;4803;4986;4987;10164;10165;10773;10774;10829;10830;10831;10934	913;2374;2375;2849;4246;4399;9004;9517;9585;9586;9681
O35295	O35295	2	2	2	Transcriptional activator protein Pur-beta	Purb	sp|O35295|PURB_MOUSE Transcriptional activator protein Pur-beta OS=Mus musculus OX=10090 GN=Purb PE=1 SV=3	1	2	2	2	1	2	1	2	1	2	12.3	12.3	12.3	33.901	324	324	0	12.612	By MS/MS	By MS/MS	2.8	12.3	20942000	4069900	16872000	2326900	452210	1874700	0	11272000	0	1	1				44	1126;1382	True;True	1196;1474	2903;2904;3587	2544;2545;3136
O35326;Q13243	O35326;Q13243	6;6	6;6	6;6	Serine/arginine-rich splicing factor 5	Srsf5;SRSF5	sp|O35326|SRSF5_MOUSE Serine/arginine-rich splicing factor 5 OS=Mus musculus OX=10090 GN=Srsf5 PE=1 SV=2;sp|Q13243|SRSF5_HUMAN Serine/arginine-rich	3	6	6	6	3	6	3	6	3	6	21.9	21.9	21.9	30.891	269	269;269;272	0	53.51	By matching	By MS/MS	11.9	21.9	451060000	16402000	434660000	56383000	2050200	54332000	29543000	277240000	0	7	7				45	513;1360;1361;2650;3199;4486	True;True;True;True;True;True	553;1452;1453;2819;3436;4794	1338;3538;3539;3540;7212;8824;8825;8826;12350;12351	1160;3095;3096;6473;7855;7856;10954
O35381	O35381	2	2	2	Acidic leucine-rich nuclear phosphoprotein 32 family member A	Anp32a	sp|O35381|AN32A_MOUSE Acidic leucine-rich nuclear phosphoprotein 32 family member A OS=Mus musculus OX=10090 GN=Anp32a PE=1 SV=1	1	2	2	2	2	2	2	2	2	2	10.1	10.1	10.1	28.537	247	247	0	49.2	By MS/MS	By MS/MS	10.1	10.1	57419000	12406000	45013000	6379900	1378500	5001400	9766300	32711000	1	2	3				46	654;3607	True;True	698;3876	1718;1719;10007;10008	1486;8863;8864
O35680	O35680	2	2	2	28S ribosomal protein S12, mitochondrial	Mrps12	sp|O35680|RT12_MOUSE 28S ribosomal protein S12, mitochondrial OS=Mus musculus OX=10090 GN=Mrps12 PE=2 SV=1	1	2	2	2	2	2	2	2	2	2	25.9	25.9	25.9	15.437	139	139	0	19.516	By matching	By MS/MS	25.9	25.9	76475000	24372000	52103000	10925000	3481700	7443400	25668000	33512000	0	2	2				47	798;2482	True;True	855;2642	2104;2105;6738;6739	1826;5989
O35691	O35691	2	2	2	Pinin	Pnn	sp|O35691|PININ_MOUSE Pinin OS=Mus musculus OX=10090 GN=Pnn PE=1 SV=4	1	2	2	2	0	2	0	2	0	2	3.7	3.7	3.7	82.435	725	725	0	13.367		By MS/MS	0	3.7	58853000	0	58853000	1783400	0	1783400	0	39317000	0	3	3				48	1166;4202	True;True	1242;4495	3019;11613;11614	2648;10296;10297
O35737;P70333	O35737;P70333	5;3	3;2	3;2	Heterogeneous nuclear ribonucleoprotein H;Heterogeneous nuclear ribonucleoprotein H, N-terminally processed;Heterogeneous nuclear ribonucleoprotein H2	Hnrnph1;Hnrnph2	sp|O35737|HNRH1_MOUSE Heterogeneous nuclear ribonucleoprotein H OS=Mus musculus OX=10090 GN=Hnrnph1 PE=1 SV=3;sp|P70333|HNRH2_MOUSE Heterogeneous nuclear ribonucleoprotein H2 OS=Mus musculus OX=10090 GN=Hnrnph2 PE=1 SV=1	2	5	3	3	5	5	3	3	3	3	16.3	10.2	10.2	49.199	449	449;449	0	51.921	By MS/MS	By MS/MS	16.3	16.3	250400000	117870000	132520000	13911000	6548500	7362300	120470000	85934000	3	4	7				49	407;1482;1730;3762;4259	False;True;True;True;False	441;1576;1843;4034;4553	1075;1076;3851;3852;4551;4552;10416;10417;10418;10419;11758;11759;11760	932;933;3378;3379;4010;9218;9219;9220;9221;10424;10425;10426
O35658	O35658	2	2	2	Complement component 1 Q subcomponent-binding protein, mitochondrial	C1qbp	sp|O35658|C1QBP_MOUSE Complement component 1 Q subcomponent-binding protein, mitochondrial OS=Mus musculus OX=10090 GN	2	3	3	3	2	3	2	3	2	3	22.2	22.2	22.2	30.997	279	279;278	0	33.604	By MS/MS	By MS/MS	16.8	22.2	105210000	22932000	82278000	8093100	1764000	6329100	25513000	52385000	2	4	6				50	104;141;3999	True;True;True	112;152;4280	275;276;277;278;383;11049;11050	236;237;238;331;9791;9792
O35972	O35972	6	6	6	39S ribosomal protein L23, mitochondrial	Mrpl23	sp|O35972|RM23_MOUSE 39S ribosomal protein L23, mitochondrial OS=Mus musculus OX=10090 GN=Mrpl23 PE=1 SV=1	1	6	6	6	5	6	5	6	5	6	61	61	61	17.121	146	146	0	80.18	By MS/MS	By MS/MS	61	61	503040000	129200000	373840000	55893000	14355000	41537000	134650000	244290000	4	5	9				51	3144;3158;3175;3686;4009;4164	True;True;True;True;True;True	3378;3394;3411;3957;4290;4455	8685;8686;8729;8730;8731;8732;8773;10197;10198;11066;11067;11507;11508	7730;7767;7768;7769;7809;9030;9806;9807;10205
Q8CDA1	Q8CDA1	1	1	1	DnaJ protein ERDJ2A;Phosphatidylinositide phosphatase SAC2	T19K24.2;ERDJ2A;Inpp5f	sp|Q8CDA1|SAC2_MOUSE Phosphatidylinositide phosphatase SAC2	3	2	2	2	2	2	2	2	2	2	1.3	1.3	1.3	133.4	1170	1170;687;1132	0	11.036	By MS/MS	By MS/MS	1.3	1.3	184310000	108210000	76099000	2792600	1639600	1153000	107360000	51692000	2	2	4				52	2582;2609	True;True	2746;2773	7022;7023;7104;7105	6259;6260;6376;6377
O54734	O54734	5	5	5	Dolichyl-diphosphooligosaccharide--protein glycosyltransferase 48 kDa subunit	Ddost	sp|O54734|OST48_MOUSE Dolichyl-diphosphooligosaccharide--protein glycosyltransferase 48 kDa subunit OS=Mus musculus OX=10090 GN=Ddost PE=1 SV=2	1	5	5	5	3	5	3	5	3	5	18.6	18.6	18.6	49.027	441	441	0	57.674	By matching	By MS/MS	8.6	18.6	135270000	28479000	106790000	6148600	1294500	4854100	28619000	71201000	0	5	5				53	935;3746;3837;4606;4746	True;True;True;True;True	999;4018;4110;4919;5070	2462;2463;10377;10378;10582;12630;12631;12955	2148;9185;9351;11198;11483
O55023	O55023	2	2	2	Inositol monophosphatase 1	Impa1	sp|O55023|IMPA1_MOUSE Inositol monophosphatase 1 OS=Mus musculus OX=10090 GN=Impa1 PE=1 SV=1	1	2	2	2	0	2	0	2	0	2	7.2	7.2	7.2	30.436	277	277	0	12.867		By MS/MS	0	7.2	21842000	0	21842000	1365100	0	1365100	0	14592000	0	1	1				54	879;3635	True;True	942;3904	2306;10078	2006;8929
O55128;O64644	O55128	4;1	4;1	4;1	Histone deacetylase complex subunit SAP18	Sap18	sp|O55128|SAP18_MOUSE Histone deacetylase complex subunit SAP18 OS=Mus musculus OX=10090 GN=Sap18 PE=1 SV=1	2	4	4	4	2	4	2	4	2	4	32	32	32	17.595	153	153;152	0	23.598	By MS/MS	By MS/MS	9.2	32	263190000	43857000	219330000	23926000	3987000	19939000	47379000	143000000	1	4	5				55	968;1223;1515;3843	True;True;True;True	1032;1310;1614;4116	2546;2547;3199;3941;10599;10600	2216;2217;2806;3453;9368
O55135	O55135	5	5	5	Eukaryotic translation initiation factor 6	Eif6	sp|O55135|IF6_MOUSE Eukaryotic translation initiation factor 6 OS=Mus musculus OX=10090 GN=Eif6 PE=1 SV=2	1	5	5	5	5	5	5	5	5	5	34.7	34.7	34.7	26.511	245	245	0	41.056	By MS/MS	By MS/MS	34.7	34.7	164520000	72208000	92310000	18280000	8023100	10257000	70316000	63560000	4	3	7				56	703;1654;3123;3323;4056	True;True;True;True;True	756;1757;3357;3566;4338	1863;1864;4265;4266;8646;8647;9149;9150;11186;11187	1621;3732;7704;7705;8136;8137;9907
O55142	O55142	13	13	13	60S ribosomal protein L35a	Rpl35a	sp|O55142|RL35A_MOUSE 60S ribosomal protein L35a OS=Mus musculus OX=10090 GN=Rpl35a PE=1 SV=2	1	13	13	13	13	10	13	10	13	10	50.9	50.9	50.9	12.554	110	110	0	117.39	By MS/MS	By MS/MS	50.9	36.4	32780000000	16204000000	16576000000	4682900000	2314900000	2368000000	17113000000	7731800000	20	13	33				57	198;554;555;871;872;1799;1800;1801;2003;3112;3673;4402;4403	True;True;True;True;True;True;True;True;True;True;True;True;True	215;595;596;934;935;1916;1917;1918;2131;3344;3943;4705;4706;4707	531;532;1443;1444;1445;1446;1447;1448;1449;1450;1451;2287;2288;2289;2290;2291;2292;4766;4767;4768;4769;4770;4771;4772;4773;4774;4775;5366;8615;10168;12132;12133;12134;12135;12136;12137;12138;12139;12140;12141	464;465;1254;1255;1256;1257;1258;1259;1260;1261;1991;1992;1993;4215;4216;4217;4218;4219;4220;4221;4222;4758;7676;9006;10763;10764;10765;10766;10767;10768;10769;10770;10771;10772
O55143;P13585;Q8R429;Q64518	O55143;P13585	4;2;1;1	4;2;1;1	4;2;1;1	Sarcoplasmic/endoplasmic reticulum calcium ATPase 2	Atp2a2	sp|O55143|AT2A2_MOUSE Sarcoplasmic/endoplasmic reticulum calcium ATPase 2 OS=Mus musculus OX=10090 GN=Atp2a2 PE=1 SV=2;sp|P13585|AT2A1_CHICK Sarcoplasmic/endoplasmic reticulum calcium ATPase 1 OS=Gallus gallus OX=9031 GN=ATP2A1 PE=2 SV=2	4	4	4	4	4	4	4	4	4	4	5.1	5.1	5.1	114.86	1044	1044;994;994;1038	0	28.778	By MS/MS	By MS/MS	5.1	5.1	105020000	52502000	52513000	2234400	1117100	1117300	52517000	35067000	2	4	6				58	224;615;4190;4240	True;True;True;True	244;659;4483;4534	618;619;1610;1611;11585;11586;11718;11719	548;1400;1401;10273;10389;10390
O55234	O55234	9	9	9	Proteasome subunit beta type-5	Psmb5	sp|O55234|PSB5_MOUSE Proteasome subunit beta type-5 OS=Mus musculus OX=10090 GN=Psmb5 PE=1 SV=3	1	9	9	9	7	9	7	9	7	9	43.6	43.6	43.6	28.532	264	264	0	95.544	By MS/MS	By MS/MS	34.5	43.6	444410000	110040000	334370000	27775000	6877300	20898000	118170000	215240000	3	9	12				59	402;534;1187;2568;3374;4197;4280;4482;4483	True;True;True;True;True;True;True;True;True	436;574;1267;2731;3621;4490;4575;4790;4791	1069;1070;1377;1378;1379;1380;3075;3076;3077;6986;6987;9316;9317;11603;11604;11825;12344;12345;12346	926;927;1196;1197;1198;2700;2701;6226;6227;8270;10287;10486;10949;10950
Q7TMK9;O60506	Q7TMK9;O60506	4;4	4;4	4;4	Heterogeneous nuclear ribonucleoprotein Q	Syncrip;SYNCRIP	sp|Q7TMK9|HNRPQ_MOUSE Heterogeneous nuclear ribonucleoprotein Q OS=Mus musculus OX=10090 GN=Syncrip PE=1 SV=2;sp|O60506|HNRPQ_HUMAN Heterogeneous nuclear ribonucleoprotein Q OS=Homo sapiens OX=9606 GN=SYNCRIP PE=1 SV=2	2	4	4	4	1	4	1	4	1	4	9.5	9.5	9.5	69.632	623	623;623	0	23.582	By MS/MS	By MS/MS	2.1	9.5	61248000	10371000	50877000	1914000	324080	1589900	0	33989000	0	2	2				60	196;635;3043;3914	True;True;True;True	213;679;3268;4192	529;1666;8433;8434;10817	462;1442;7521;9571
O70133	O70133	12	12	12	ATP-dependent RNA helicase A	Dhx9	sp|O70133|DHX9_MOUSE ATP-dependent RNA helicase A OS=Mus musculus OX=10090 GN=Dhx9 PE=1 SV=2	1	12	12	12	10	12	10	12	10	12	12.3	12.3	12.3	149.47	1380	1380	0	103.13	By MS/MS	By MS/MS	10.5	12.3	506390000	190120000	316270000	8038000	3017800	5020200	206330000	192500000	8	14	22				62	605;921;1309;1433;1500;2315;2989;3299;4030;4077;4722;4730	True;True;True;True;True;True;True;True;True;True;True;True	649;984;1400;1527;1597;1598;2462;3209;3541;4312;4363;5046;5054	1581;2422;2423;3419;3420;3720;3899;3900;3901;6307;6308;8245;8246;9088;9089;11128;11129;11130;11270;11271;11272;11273;12906;12907;12922;12923;12924;12925	1371;2108;2109;2998;3246;3418;3419;5612;5613;7347;8086;9858;9859;9986;9987;9988;9989;11443;11444;11457;11458;11459;11460
O70194	O70194	5	5	5	Eukaryotic translation initiation factor 3 subunit D	Eif3d	sp|O70194|EIF3D_MOUSE Eukaryotic translation initiation factor 3 subunit D OS=Mus musculus OX=10090 GN=Eif3d PE=1 SV=2	1	5	5	5	4	5	4	5	4	5	15.5	15.5	15.5	63.988	548	548	0	28.509	By MS/MS	By MS/MS	11.9	15.5	79450000	37129000	42321000	3178000	1485200	1692800	39134000	26269000	2	3	5				63	678;1819;2457;3079;4036	True;True;True;True;True	730;1936;2615;3306;4318	1797;1798;4810;4811;6677;6678;8523;8524;11146	1560;1561;4253;5936;5937;7601;9872
O70237	O70237	2	2	2	Zinc finger protein Gfi-1b	Gfi1b	sp|O70237|GFI1B_MOUSE Zinc finger protein Gfi-1b OS=Mus musculus OX=10090 GN=Gfi1b PE=1 SV=1	1	2	2	2	2	2	2	2	2	2	10.3	10.3	10.3	37.442	330	330	0	13.736	By MS/MS	By MS/MS	10.3	10.3	89308000	37124000	52185000	5253400	2183800	3069700	37019000	34967000	2	2	4				64	350;2868	True;True	381;3052	950;951;7845;7846	821;822;7009;7010
O70251	O70251	2	2	2	Elongation factor 1-beta	Eef1b	sp|O70251|EF1B_MOUSE Elongation factor 1-beta OS=Mus musculus OX=10090 GN=Eef1b PE=1 SV=5	1	2	2	2	1	2	1	2	1	2	20.9	20.9	20.9	24.693	225	225	0	34.346	By MS/MS	By MS/MS	6.7	20.9	40951000	10362000	30589000	3412600	863510	2549100	0	20435000	1	2	3				65	3815;4019	True;True	4088;4300	10538;11105;11106	9314;9839;9840
Q9Z1D1;O75821	Q9Z1D1;O75821	2;2	2;2	2;2	Eukaryotic translation initiation factor 3 subunit G	Eif3g;EIF3G	sp|Q9Z1D1|EIF3G_MOUSE Eukaryotic translation initiation factor 3 subunit G OS=Mus musculus OX=10090 GN=Eif3g PE=1 SV=2;sp|O75821|EIF3G_HUMAN Eukaryotic translation initiation factor 3 subunit G OS=Homo sapiens OX=9606 GN=EIF3G PE=1 SV=2	2	2	2	2	2	2	2	2	2	2	14.7	14.7	14.7	35.638	320	320;320	0	16.343	By matching	By MS/MS	14.7	14.7	56221000	16771000	39450000	2959000	882670	2076300	19606000	23519000	0	2	2				66	1027;3190	True;True	1096;3427	2690;2691;2692;8806;8807	2341;2342;7841
O88342	O88342	2	2	2	WD repeat-containing protein 1	Wdr1	sp|O88342|WDR1_MOUSE WD repeat-containing protein 1 OS=Mus musculus OX=10090 GN=Wdr1 PE=1 SV=3	1	2	2	2	1	2	1	2	1	2	5.8	5.8	5.8	66.406	606	606	0	17.165	By matching	By MS/MS	3.1	5.8	12396000	3201400	9194800	413210	106710	306490	0	6142700	0	2	2				67	1093;2360	True;True	1162;2510	2824;6434;6435	2456;5713
O88441	O88441	5	5	5	Metaxin-2	Mtx2	sp|O88441|MTX2_MOUSE Metaxin-2 OS=Mus musculus OX=10090 GN=Mtx2 PE=1 SV=1	1	5	5	5	1	5	1	5	1	5	30.8	30.8	30.8	29.758	263	263	0	54.36	By matching	By MS/MS	7.2	30.8	154970000	2073300	152900000	12915000	172770	12742000	0	102150000	0	4	4				68	1406;3161;3962;4429;4663	True;True;True;True;True	1500;3397;4242;4734;4980	3662;8739;10940;10941;12216;12760	3204;7776;9686;10839;11307
O88569	O88569	2	2	2	Heterogeneous nuclear ribonucleoproteins A2/B1	Hnrnpa2b1	sp|O88569|ROA2_MOUSE Heterogeneous nuclear ribonucleoproteins A2/B1 OS=Mus musculus OX=10090 GN=Hnrnpa2b1 PE=1 SV=2	1	2	2	2	2	2	2	2	2	2	8.5	8.5	8.5	37.402	353	353	0	13.296	By MS/MS	By MS/MS	8.5	8.5	65676000	23963000	41713000	3283800	1198100	2085600	0	27867000	0	1	1				69	1364;1385	True;True	1456;1477	3547;3548;3595;3596	3102;3103;3143
O88796	O88796	2	2	2	Ribonuclease P protein subunit p30	Rpp30	sp|O88796|RPP30_MOUSE Ribonuclease P protein subunit p30 OS=Mus musculus OX=10090 GN=Rpp30 PE=1 SV=1	1	2	2	2	2	2	2	2	2	2	7.1	7.1	7.1	29.473	268	268	0	10.729	By MS/MS	By MS/MS	7.1	7.1	25527000	11699000	13827000	1701800	779960	921810	11793000	9143400	1	2	3				70	12;2865	True;True	12;3048	22;23;7837;7838	20;21;7003
O88967	O88967	3	3	3	ATP-dependent zinc metalloprotease YME1L1	Yme1l1	sp|O88967|YMEL1_MOUSE ATP-dependent zinc metalloprotease YME1L1 OS=Mus musculus OX=10090 GN=Yme1l1 PE=1 SV=1	1	3	3	3	3	3	3	3	3	3	6.6	6.6	6.6	80.027	715	715	0	22.168	By MS/MS	By MS/MS	6.6	6.6	53551000	23822000	29729000	1338800	595540	743230	21916000	21766000	2	3	5				71	1584;2748;2811	True;True;True	1684;2925;2992	4104;4105;7471;7472;7703;7704	3588;3589;6691;6884;6885
O89086	O89086	2	2	2	RNA-binding protein 3	Rbm3	sp|O89086|RBM3_MOUSE RNA-binding protein 3 OS=Mus musculus OX=10090 GN=Rbm3 PE=1 SV=1	1	2	2	2	1	2	1	2	1	2	20.9	20.9	20.9	16.604	153	153	0	16.417	By matching	By MS/MS	11.8	20.9	57542000	1785100	55757000	7192800	223140	6969600	0	28081000	0	3	3				72	1357;4628	True;True	1448;1449;4943	3531;3532;3533;12691	3091;3092;11250
P00920;P00918	P00920	7;2	7;2	7;2	Carbonic anhydrase 2	Ca2	sp|P00920|CAH2_MOUSE Carbonic anhydrase 2 OS=Mus musculus OX=10090 GN=Ca2 PE=1 SV=4	2	7	7	7	4	7	4	7	4	7	42.3	42.3	42.3	29.032	260	260;260	0	100.83	By matching	By MS/MS	21.2	42.3	974680000	48825000	925850000	74975000	3755800	71219000	82931000	575730000	0	11	11				75	458;989;1841;3577;3982;4342;4611	True;True;True;True;True;True;True	495;1055;1056;1958;3845;4263;4641;4925	1202;1203;2592;2593;2594;4858;4859;9895;9896;10992;11984;11985;12639;12640;12641	1041;1042;2254;2255;2256;4289;8764;9725;10634;11205;11206
P01942;B3EWD5;P11757;B3EWD3;P01948;P06467;P02008	P01942;B3EWD5	6;3;2;2;2;1;1	6;3;2;2;2;1;1	4;1;0;0;0;0;0	Hemoglobin subunit alpha	Hba	sp|P01942|HBA_MOUSE Hemoglobin subunit alpha OS=Mus musculus OX=10090 GN=Hba PE=1 SV=2;sp|B3EWD5|HBA_PERCA Hemoglobin subunit alpha OS=Peromyscus californicus OX=42520 PE=1 SV=1	7	6	6	4	4	6	4	6	3	4	42.3	42.3	35.9	15.085	142	142;141;141;141;142;142;142	0	50.78	By matching	By MS/MS	33.1	42.3	1053000000	21493000	1031500000	131620000	2686600	128940000	29605000	654120000	0	8	8				77	1833;2732;2893;4117;4187;4383	True;True;True;True;True;True	1950;2909;3082;3083;4407;4480;4683	4837;4838;7435;7933;7934;7935;11383;11384;11385;11386;11580;11581;12083	4272;6660;7083;7084;10091;10092;10093;10270;10722
P02088;P11758;B3EWD6;B3EWD4	P02088	11;4;3;3	4;0;0;0	4;0;0;0	Hemoglobin subunit beta-1	Hbb-b1	sp|P02088|HBB1_MOUSE Hemoglobin subunit beta-1 OS=Mus musculus OX=10090 GN=Hbb-b1 PE=1 SV=2	4	11	4	4	2	11	0	4	0	4	78.2	38.8	38.8	15.84	147	147;146;146;146	0	53.5	By matching	By MS/MS	12.9	78.2	372040000	0	372040000	33822000	0	33822000	0	231780000	0	5	5				78	50;572;1577;1578;2501;2638;4303;4417;4512;4513;4644	True;False;False;False;False;False;True;True;False;False;True	52;613;1677;1678;2662;2806;4599;4722;4822;4823;4959;4960	109;1493;4083;4084;4085;6783;6784;6785;7181;7182;11869;12183;12407;12408;12409;12722;12723;12724	92;1299;3570;3571;3572;6026;6027;6445;6446;10520;10811;11000;11001;11002;11276;11277;11278
P02089	P02089	13	13	6	Hemoglobin subunit beta-2	Hbb-b2	sp|P02089|HBB2_MOUSE Hemoglobin subunit beta-2 OS=Mus musculus OX=10090 GN=Hbb-b2 PE=1 SV=2	1	13	13	6	3	13	3	13	1	6	85.7	85.7	46.3	15.878	147	147	0	107.9	By MS/MS	By MS/MS	19.7	85.7	3360500000	103010000	3257500000	305500000	9365000	296140000	103010000	2148900000	1	19	20				79	572;1577;1578;2281;2501;2597;2638;3469;4304;4413;4512;4513;4645	True;True;True;True;True;True;True;True;True;True;True;True;True	613;1677;1678;2427;2662;2761;2806;3723;4600;4718;4822;4823;4961;4962	1493;4083;4084;4085;6216;6783;6784;6785;7079;7080;7081;7181;7182;9618;11870;11871;12169;12407;12408;12409;12725;12726	1299;3570;3571;3572;5525;6026;6027;6355;6356;6357;6445;6446;8532;10521;10793;11000;11001;11002;11279;11280
P48678	P48678	2	2	2	Prelamin-A/C;Lamin-A/C	LMNA;Lmna	sp|P48678|LMNA_MOUSE Prelamin-A/C OS=Mus musculus OX=10090 GN=Lmna PE=1 SV=2	2	2	2	2	1	2	1	2	1	2	3.6	3.6	3.6	74.139	664	664;665	0	11.001	By MS/MS	By MS/MS	2.1	3.6	21240000	11285000	9954800	518050	275250	242800	0	6650400	0	0	0				81	3968;4158	True;True	4248;4449	10952;11493;11494	9693;10192
P03975	P03975	14	2	2	IgE-binding protein	Iap	sp|P03975|IGEB_MOUSE IgE-binding protein OS=Mus musculus OX=10090 GN=Iap PE=2 SV=1	1	14	2	2	14	14	2	2	2	2	30.5	4.8	4.8	62.747	557	557	0	37.943	By MS/MS	By MS/MS	30.5	30.5	2003400000	276450000	1727000000	74202000	10239000	63963000	276350000	1153800000	4	4	8				84	18;302;311;1816;1887;1916;1993;2165;2306;2326;2702;3211;4258;4664	False;True;False;False;True;False;False;False;False;False;False;False;False;False	18;328;339;1933;2006;2037;2121;2305;2453;2473;2474;2879;3450;4552;4981	31;32;820;821;822;823;845;846;4804;4805;4806;4988;4989;4990;4991;5091;5092;5093;5094;5339;5340;5341;5825;5826;5827;5828;6286;6287;6288;6289;6331;6332;6333;6334;6335;7356;7357;7358;7359;8866;8867;11755;11756;11757;12761;12762	28;29;707;708;709;710;728;729;4247;4248;4249;4400;4401;4402;4403;4500;4501;4502;4503;4737;4738;4739;4740;5186;5187;5188;5189;5594;5595;5630;5631;5632;5633;6595;6596;6597;7893;7894;10422;10423;11308;11309
P05064;P05063	P05064	8;1	8;1	8;1	Fructose-bisphosphate aldolase A	Aldoa	sp|P05064|ALDOA_MOUSE Fructose-bisphosphate aldolase A OS=Mus musculus OX=10090 GN=Aldoa PE=1 SV=2	2	8	8	8	6	8	6	8	6	8	38.2	38.2	38.2	39.355	364	364;363	0	65.156	By MS/MS	By MS/MS	25	38.2	303460000	88013000	215440000	13194000	3826700	9367100	108760000	123190000	3	9	12				87	1236;1831;3177;3178;3403;4102;4412;4621	True;True;True;True;True;True;True;True	1323;1948;3413;3414;3651;4390;4717;4936	3221;3222;3223;4833;4834;8778;8779;8780;8781;9412;9413;11343;12167;12168;12671;12672;12673	2825;2826;4269;4270;7812;7813;8346;10055;10791;10792;11232;11233;11234
P05201	P05201	2	2	2	Aspartate aminotransferase, cytoplasmic	Got1	sp|P05201|AATC_MOUSE Aspartate aminotransferase, cytoplasmic OS=Mus musculus OX=10090 GN=Got1 PE=1 SV=3	1	2	2	2	2	2	2	2	2	2	9.7	9.7	9.7	46.247	413	413	0	12.768	By MS/MS	By MS/MS	9.7	9.7	16294000	5895200	10399000	678920	245630	433290	5892300	6950000	1	2	3				88	335;1757	True;True	364;1873	919;920;4646;4647	794;795;4106
P05213;P08537;Q3UX10	P05213;P08537	16;15;1	16;15;1	0;0;0	Tubulin alpha-1B chain;Tubulin alpha chain	Tuba1b;tuba	sp|P05213|TBA1B_MOUSE Tubulin alpha-1B chain OS=Mus musculus OX=10090 GN=Tuba1b PE=1 SV=2;sp|P08537|TBA_XENLA Tubulin alpha chain OS=Xenopus laevis OX=8355 GN=tuba PE=2 SV=2	3	16	16	0	14	15	14	15	0	0	49.4	49.4	0	50.151	451	451;449;446	0	225.79	By MS/MS	By MS/MS	41.9	49.2	4923400000	2352800000	2570600000	234450000	112040000	122410000	2317200000	1707600000	16	19	35				89	142;431;445;467;737;883;1857;2382;2528;3047;3271;3272;3414;3570;3929;4245	True;True;True;True;True;True;True;True;True;True;True;True;True;True;True;True	153;465;481;504;505;791;946;1974;2535;2690;3272;3512;3513;3665;3838;4208;4539	384;1124;1125;1168;1169;1170;1171;1221;1222;1223;1224;1951;1952;2314;2315;4904;4905;4906;4907;6501;6502;6503;6856;6857;8443;8444;8445;8446;9016;9017;9018;9019;9020;9021;9022;9023;9024;9448;9881;9882;10860;10861;10862;10863;11724;11725	332;972;1011;1012;1013;1014;1057;1058;1059;1060;1696;2013;2014;4325;4326;4327;4328;5774;5775;6105;6106;7528;7529;7530;8027;8028;8029;8030;8031;8032;8033;8373;8754;9610;9611;9612;10395;10396
P06151;P00342;P00338;P19629;P16125	P06151	8;2;2;1;1	8;2;2;1;1	8;2;2;1;1	L-lactate dehydrogenase A chain	Ldha	sp|P06151|LDHA_MOUSE L-lactate dehydrogenase A chain OS=Mus musculus OX=10090 GN=Ldha PE=1 SV=3	5	8	8	8	7	8	7	8	7	8	22.6	22.6	22.6	36.498	332	332;332;332;332;334	0	101.01	By MS/MS	By MS/MS	17.8	22.6	338500000	88890000	249610000	18805000	4938300	13867000	67269000	188370000	4	9	13				90	413;627;628;687;688;2817;3640;4282	True;True;True;True;True;True;True;True	447;671;672;740;741;2998;3909;4577	1088;1089;1648;1649;1650;1651;1652;1834;1835;1836;1837;7714;7715;10088;11828;11829	943;1428;1429;1430;1597;1598;1599;1600;6893;6894;8940;10488;10489
P06745;CON__Q3ZBD7;P06744	P06745;CON__Q3ZBD7;P06744	2;1;1	2;1;1	2;1;1	Glucose-6-phosphate isomerase	Gpi;GPI	sp|P06745|G6PI_MOUSE Glucose-6-phosphate isomerase OS=Mus musculus OX=10090 GN=Gpi PE=1 SV=4;;sp|P06744|G6PI_HUMAN Glucose-6-phosphate isomerase OS=Homo sapiens OX=9606 GN=GPI PE=1 SV=4	3	2	2	2	2	2	2	2	2	2	5.7	5.7	5.7	62.766	558	558;557;558	0	13.298	By MS/MS	By MS/MS	5.7	5.7	26582000	7655800	18926000	1022400	294450	727930	7319200	12980000	1	2	3			+	91	3957;4218	True;True	4237;4512	10932;10933;11651;11652	9680;10326;10327
P07356;P07355	P07356;P07355	3;3	3;3	3;3	Annexin A2	Anxa2;ANXA2	sp|P07356|ANXA2_MOUSE Annexin A2 OS=Mus musculus OX=10090 GN=Anxa2 PE=1 SV=2;sp|P07355|ANXA2_HUMAN Annexin A2 OS=Homo sapiens OX=9606 GN=ANXA2 PE=1 SV=2	2	3	3	3	3	2	3	2	3	2	10	10	10	38.676	339	339;339	0	17.183	By MS/MS	By MS/MS	10	7.4	15236000	8231500	7004100	662420	357890	304530	0	4679200	2	0	2				92	1590;3217;3663	True;True;True	1691;3456;3932	4123;4124;8877;10139;10140	3606;7901;8984
P07724	P07724	3	2	2	Serum albumin	Alb	sp|P07724|ALBU_MOUSE Serum albumin OS=Mus musculus OX=10090 GN=Alb PE=1 SV=3	1	3	2	2	3	1	2	0	2	0	7.1	4.8	4.8	68.692	608	608	0	12.469	By MS/MS	By matching	7.1	2.3	26218000	26218000	0	672260	672260	0	26218000	0	2	0	2				93	337;806;2753	True;False;True	366;863;2930	923;2124;2125;2126;7481	797;1845;1846;6697
P07901	P07901	20	20	3	Heat shock protein HSP 90-alpha	Hsp90aa1	sp|P07901|HS90A_MOUSE Heat shock protein HSP 90-alpha OS=Mus musculus OX=10090 GN=Hsp90aa1 PE=1 SV=4	1	20	20	3	18	20	18	20	3	3	30.8	30.8	4.5	84.787	733	733	0	232.22	By MS/MS	By MS/MS	26.5	30.8	1690300000	729450000	960830000	51221000	22104000	29116000	721230000	650110000	13	20	33				94	87;270;937;941;942;1286;1604;1646;1652;1670;1674;1696;1724;3096;3651;4002;4290;4291;4640;4674	True;True;True;True;True;True;True;True;True;True;True;True;True;True;True;True;True;True;True;True	91;293;1001;1005;1006;1375;1705;1749;1755;1776;1781;1806;1837;3326;3920;4283;4586;4587;4955;4991	206;207;743;744;2468;2469;2475;2476;2477;2478;2479;2480;3366;3367;4147;4148;4237;4260;4334;4335;4353;4354;4355;4356;4430;4431;4539;4540;4541;8573;8574;10106;10107;10108;11054;11055;11845;11846;11847;11848;12715;12716;12778;12779	178;179;649;650;2151;2155;2156;2157;2158;2159;2957;3628;3629;3704;3729;3804;3805;3825;3826;3827;3901;3999;4000;4001;7641;7642;8955;8956;9795;10500;10501;10502;11271;11323;11324
P08032	P08032	5	5	5	Spectrin alpha chain, erythrocytic 1	Spta1	sp|P08032|SPTA1_MOUSE Spectrin alpha chain, erythrocytic 1 OS=Mus musculus OX=10090 GN=Spta1 PE=1 SV=3	1	5	5	5	0	5	0	5	0	5	3	3	3	279.86	2415	2415	0	33.737		By MS/MS	0	3	27765000	0	27765000	202670	0	202670	0	18549000	0	3	3				95	275;652;1447;1640;3827	True;True;True;True;True	298;696;1541;1742;4100	753;1715;3751;4220;10568	655;1484;3274;3685;9338
P08113	P08113	3	2	2	Endoplasmin	Hsp90b1	sp|P08113|ENPL_MOUSE Endoplasmin OS=Mus musculus OX=10090 GN=Hsp90b1 PE=1 SV=2	1	3	2	2	1	3	0	2	0	2	4.7	3.2	3.2	92.475	802	802	0	15.602	By matching	By MS/MS	1.5	4.7	16000000	0	16000000	410260	0	410260	0	10689000	0	1	1				96	940;2527;3884	False;True;True	1004;2689;4160	2473;2474;6855;10739	2154;6104;9489
P08228;P07632;P00441	P08228;P07632	5;3;1	5;3;1	5;3;1	Superoxide dismutase [Cu-Zn]	Sod1	sp|P08228|SODC_MOUSE Superoxide dismutase [Cu-Zn] OS=Mus musculus OX=10090 GN=Sod1 PE=1 SV=2;sp|P07632|SODC_RAT Superoxide dismutase [Cu-Zn] OS=Rattus norvegicus OX=10116 GN=Sod1 PE=1 SV=2	3	5	5	5	5	5	5	5	5	5	39	39	39	15.942	154	154;154;154	0	41.017	By MS/MS	By MS/MS	39	39	1162400000	229430000	932990000	129160000	25493000	103670000	227330000	625400000	1	4	5				97	583;1329;1735;2318;4302	True;True;True;True;True	625;1420;1848;2465;4598	1524;1525;3474;3475;4561;4562;6313;6314;11867;11868	1324;3043;4016;5617;10519
P11499;P08238;Q9SB00;Q9STX5	P11499;P08238	19;19;1;1	11;11;1;1	9;9;1;0	Heat shock protein HSP 90-beta	Hsp90ab1;HSP90AB1	sp|P11499|HS90B_MOUSE Heat shock protein HSP 90-beta OS=Mus musculus OX=10090 GN=Hsp90ab1 PE=1 SV=3;sp|P08238|HS90B_HUMAN Heat shock protein HSP 90-beta OS=Homo sapiens OX=9606 GN=HSP90AB1 PE=1 SV=4	4	19	11	9	17	19	10	11	8	9	31.4	18.6	15.2	83.28	724	724;724;496;823	0	124.98	By MS/MS	By MS/MS	27.1	31.4	873920000	334250000	539670000	26482000	10129000	16354000	324550000	370230000	6	11	17				98	87;228;327;940;1007;1355;1604;1646;1673;1696;1725;1779;3097;3650;3658;4290;4291;4640;4674	False;True;True;True;True;True;False;False;True;False;True;True;True;True;True;False;False;False;False	91;249;356;1004;1075;1446;1705;1749;1780;1806;1838;1895;3327;3919;3927;4586;4587;4955;4991	206;207;631;632;890;891;2473;2474;2631;2632;3527;3528;4147;4148;4237;4351;4352;4430;4431;4542;4543;4544;4545;4693;4694;8575;8576;10102;10103;10104;10105;10128;10129;11845;11846;11847;11848;12715;12716;12778;12779	178;179;558;762;2154;2287;3087;3088;3628;3629;3704;3823;3824;3901;4002;4003;4004;4143;4144;7643;7644;8952;8953;8954;8975;10500;10501;10502;11271;11323;11324
P08249;P40926	P08249;P40926	11;7	11;7	11;7	Malate dehydrogenase, mitochondrial	Mdh2;MDH2	sp|P08249|MDHM_MOUSE Malate dehydrogenase, mitochondrial OS=Mus musculus OX=10090 GN=Mdh2 PE=1 SV=3;sp|P40926|MDHM_HUMAN Malate dehydrogenase, mitochondrial OS=Homo sapiens OX=9606 GN=MDH2 PE=1 SV=3	2	11	11	11	9	11	9	11	9	11	45.3	45.3	45.3	35.611	338	338;338	0	103.37	By MS/MS	By MS/MS	37.6	45.3	1055000000	151420000	903570000	50238000	7210500	43027000	165930000	589120000	5	13	18				99	144;319;1028;1321;1818;2790;2903;3934;4160;4177;4420	True;True;True;True;True;True;True;True;True;True;True	155;347;1097;1412;1935;2967;3096;4213;4451;4469;4725	386;871;872;2693;2694;3457;3458;4808;4809;7575;7576;7577;7578;7961;10871;10872;11497;11498;11499;11551;11552;11553;12195;12196	334;749;2343;2344;3029;4251;4252;6769;6770;6771;7104;9619;10195;10196;10197;10245;10246;10247;10822
P09103	P09103	7	7	7	Protein disulfide-isomerase	P4hb	sp|P09103|PDIA1_MOUSE Protein disulfide-isomerase OS=Mus musculus OX=10090 GN=P4hb PE=1 SV=2	1	7	7	7	6	7	6	7	6	7	17.5	17.5	17.5	57.058	509	509	0	51.081	By MS/MS	By MS/MS	15.5	17.5	184510000	44765000	139740000	5591100	1356500	4234600	49000000	89120000	1	6	7				100	773;1698;1922;2534;4173;4392;4731	True;True;True;True;True;True;True	828;1808;2043;2696;4464;4693;5055	2050;2051;4436;4437;5118;5119;6866;11536;11537;12110;12111;12926;12927	1779;1780;3906;4521;6115;10230;10745;11461
P09405	P09405	14	14	14	Nucleolin	Ncl	sp|P09405|NUCL_MOUSE Nucleolin OS=Mus musculus OX=10090 GN=Ncl PE=1 SV=2	1	14	14	14	11	14	11	14	11	14	20.4	20.4	20.4	76.722	707	707	0	138.64	By MS/MS	By MS/MS	19.2	20.4	789570000	243510000	546050000	21932000	6764200	15168000	243030000	365280000	4	11	15				101	254;1031;1084;1146;1359;1485;1486;1614;2122;2980;3261;3799;4000;4200	True;True;True;True;True;True;True;True;True;True;True;True;True;True	277;1100;1153;1219;1451;1579;1580;1716;2258;3200;3502;4071;4281;4493	707;2700;2701;2807;2808;2958;3536;3537;3856;3857;3858;3859;3860;4165;4166;5691;5692;8218;8219;8988;8989;10504;10505;11051;11052;11609;11610	621;2348;2439;2440;2595;3094;3383;3384;3385;3643;5057;7324;8002;9287;9793;10292;10293
P09411;P09041	P09411	13;3	13;3	13;3	Phosphoglycerate kinase 1	Pgk1	sp|P09411|PGK1_MOUSE Phosphoglycerate kinase 1 OS=Mus musculus OX=10090 GN=Pgk1 PE=1 SV=4	2	13	13	13	8	13	8	13	8	13	47.2	47.2	47.2	44.55	417	417;417	0	186.83	By MS/MS	By MS/MS	29	47.2	1834000000	326220000	1507800000	70538000	12547000	57991000	328500000	996160000	9	18	27				102	256;535;1096;1323;2027;2458;2783;3904;4176;4369;4474;4594;4743	True;True;True;True;True;True;True;True;True;True;True;True;True	279;575;1165;1414;2158;2616;2960;4182;4468;4668;4669;4782;4906;5067	710;711;712;713;1381;1382;1383;1384;1385;2829;2830;3461;3462;5425;5426;5427;5428;6679;6680;6681;6682;7557;7558;10785;11550;12049;12050;12329;12595;12951;12952	623;624;625;1199;1200;1201;1202;2463;3031;3032;4808;4809;4810;4811;5938;5939;5940;5941;6758;6759;9527;10244;10690;10691;10936;11169;11480
P63158;P09429	P63158;P09429	7;7	7;7	6;6	High mobility group protein B1	Hmgb1;HMGB1	sp|P63158|HMGB1_MOUSE High mobility group protein B1 OS=Mus musculus OX=10090 GN=Hmgb1 PE=1 SV=2;sp|P09429|HMGB1_HUMAN High mobility group protein B1 OS=Homo sapiens OX=9606 GN=HMGB1 PE=1 SV=3	2	7	7	6	3	7	3	7	2	6	31.6	31.6	26	24.893	215	215;215	0	88.28	By MS/MS	By MS/MS	20	31.6	805380000	52646000	752740000	134230000	8774400	125460000	63972000	464820000	1	10	11				103	1343;1699;1909;2153;2943;3424;4120	True;True;True;True;True;True;True	1434;1809;2030;2292;3156;3157;3675;4410	3507;4438;5074;5075;5076;5077;5781;8112;8113;8114;9474;9475;9476;11391	3069;3907;4487;4488;4489;5144;7235;7236;8396;8397;10098
P09528	P09528	6	6	6	Ferritin heavy chain;Ferritin heavy chain, N-terminally processed	Fth1	sp|P09528|FRIH_MOUSE Ferritin heavy chain OS=Mus musculus OX=10090 GN=Fth1 PE=1 SV=2	1	6	6	6	6	5	6	5	6	5	34.1	34.1	34.1	21.066	182	182	0	50.189	By MS/MS	By MS/MS	34.1	29.1	367240000	205400000	161840000	33386000	18673000	14713000	201640000	111880000	2	4	6				104	931;932;1823;2359;3791;4065	True;True;True;True;True;True	995;996;1940;2509;4063;4348	2451;2452;2453;2454;4817;4818;6430;6431;6432;6433;10490;10491;11210	2138;2139;4259;5709;5710;5711;5712;9277;9928
P09671	P09671	2	2	2	Superoxide dismutase [Mn], mitochondrial	Sod2	sp|P09671|SODM_MOUSE Superoxide dismutase [Mn], mitochondrial OS=Mus musculus OX=10090 GN=Sod2 PE=1 SV=3	1	2	2	2	1	2	1	2	1	2	12.6	12.6	12.6	24.603	222	222	0	17.63	By matching	By MS/MS	6.3	12.6	45861000	3676700	42184000	4169200	334250	3834900	0	28182000	0	3	3				105	219;1338	True;True	239;1429	610;611;3495;3496	542;543;3059
Q8BSL7;P84078;P61205;P36397;P0DH91;P84084;P61750	Q8BSL7;P84078;P61205;P36397;P0DH91;P84084;P61750	2;2;2;2;2;1;1	2;2;2;2;2;1;1	2;2;2;2;2;1;1	ADP-ribosylation factor 2-A;ADP-ribosylation factor 2;ADP-ribosylation factor 1;ADP-ribosylation factor 3;ADP-ribosylation factor 2-B;ADP-ribosylation factor 5;ADP-ribosylation factor 4	ARF2-A;Arf2;Arf1;Arf3;ARF1;ARF2-B;Arf5;Arf4	sp|Q8BSL7|ARF2_MOUSE ADP-ribosylation factor 2 OS=Mus musculus OX=10090 GN=Arf2 PE=1 SV=2;sp|P84078|ARF1_MOUSE ADP-ribosylation factor 1 OS=Mus musculus O	8	2	2	2	0	2	0	2	0	2	19.9	19.9	19.9	20.592	181	181;181;181;181;181;181;180;180	0	17.148		By MS/MS	0	19.9	28411000	0	28411000	2841100	0	2841100	0	18980000	0	3	3				107	2460;3219	True;True	2618;3458	6692;6693;8879	5951;5952;7903
P0DP28;P0DP27;P0DP26;Q9D6P8	P0DP28;P0DP27;P0DP26;Q9D6P8	2;2;2;1	2;2;2;1	2;2;2;1	Calmodulin-like protein 3	Calml3	sp|P0DP28|CALM3_MOUSE Calmodulin-3 OS=Mus musculus OX=10090 GN=Calm3 PE=1 SV=1;sp|P0DP27|CALM2_MOUSE Calmodulin-2 OS=Mus musculus OX=10090 GN=Calm2 PE=1 SV=1;sp|P0DP26|CALM1_MOUSE Calmodulin-1 OS=Mus musculus OX=10090 GN=Calm1 PE=1 SV=1;sp|Q9D6P8|CALL3_MOU	4	2	2	2	2	2	2	2	2	2	20.1	20.1	20.1	16.837	149	149;149;149;149	0	110.26	By MS/MS	By MS/MS	20.1	20.1	330100000	59443000	270660000	36678000	6604700	30073000	63788000	176470000	1	2	3				108	88;781	True;True	92;837	208;209;2064;2065;2066;2067	180;1791;1792;1793
P10126;P68104;Q05639;P62631;Q8W4H7;Q8GTY0;Q0WL56;P0DH99	P10126;P68104	11;10;5;5;3;3;3;3	11;10;5;5;3;3;3;3	11;10;5;5;3;3;3;3	Elongation factor 1-alpha 1	Eef1a1;EEF1A1	sp|P10126|EF1A1_MOUSE Elongation factor 1-alpha 1 OS=Mus musculus OX=10090 GN=Eef1a1 PE=1 SV=3;sp|P68104|EF1A1_HUMAN Elongation factor 1-alpha 1 OS=Homo sapie	9	11	11	11	10	11	10	11	10	11	35.3	35.3	35.3	50.113	462	462;462;462;463;463;449;449;449;449	0	161.19	By MS/MS	By MS/MS	33.1	35.3	3088400000	720020000	2368400000	147070000	34286000	112780000	741240000	1554400000	7	15	22				109	579;1063;1834;2683;2886;3277;3521;3771;3915;4213;4783	True;True;True;True;True;True;True;True;True;True;True	621;1132;1951;2860;3072;3518;3784;3785;4043;4193;4506;4507;5108	1513;1514;1515;2757;2758;4839;4840;7323;7324;7916;7917;9031;9032;9772;9773;9774;10433;10818;10819;11641;11642;11643;13045;13046;13047;13048	1315;1316;2396;2397;4273;6566;6567;7070;8038;8039;8665;8666;8667;9231;9572;10318;10319;10320;11568;11569;11570;11571
P10518;P06214	P10518;P06214	6;5	6;5	6;5	Delta-aminolevulinic acid dehydratase	Alad	sp|P10518|HEM2_MOUSE Delta-aminolevulinic acid dehydratase OS=Mus musculus OX=10090 GN=Alad PE=1 SV=1;sp|P06214|HEM2_RAT Delta-aminolevulinic acid dehydratase OS=Rattus norvegicus OX=10116 GN=Alad PE=1 SV=1	2	6	6	6	1	6	1	6	1	6	24.2	24.2	24.2	36.023	330	330;330	0	62.846	By matching	By MS/MS	3	24.2	112760000	7816600	104940000	7047200	488540	6558700	0	70105000	0	6	6				110	143;511;552;610;1087;4430	True;True;True;True;True;True	154;551;592;654;1156;4735	385;1334;1335;1434;1594;2815;12217	333;1157;1246;1383;2447;10840
P10922	P10922	3	3	3	Histone H1.0;Histone H1.0, N-terminally processed	H1f0	sp|P10922|H10_MOUSE Histone H1.0 OS=Mus musculus OX=10090 GN=H1f0 PE=2 SV=4	1	3	3	3	0	3	0	3	0	3	17.5	17.5	17.5	20.861	194	194	0	18.912		By MS/MS	0	17.5	175880000	0	175880000	35177000	0	35177000	0	117500000	0	3	3				111	2848;3875;4737	True;True;True	3031;4150;5061	7794;7795;10703;12937	6964;6965;9464;11469
P11983;P18279;P17987	P11983;P18279;P17987	4;3;3	4;3;3	4;3;3	T-complex protein 1 subunit alpha	Tcp1;TCP1	sp|P11983|TCPA_MOUSE T-complex protein 1 subunit alpha OS=Mus musculus OX=10090 GN=Tcp1 PE=1 SV=3;sp|P18279|TCPA_CRIGR T-complex protein 1 subunit alpha OS	4	4	4	4	4	4	4	4	4	4	10.1	10.1	10.1	60.359	556	556;556;556;556	0	25.088	By MS/MS	By MS/MS	10.1	10.1	97115000	55699000	41416000	3132700	1796700	1336000	59365000	23245000	3	3	6				113	2888;3632;4583;4725	True;True;True;True	3074;3075;3901;4895;5049	7920;7921;7922;10071;10072;10073;12576;12577;12911;12912	7073;7074;8924;8925;11154;11448
P12787	P12787	3	3	3	Cytochrome c oxidase subunit 5A, mitochondrial	Cox5a	sp|P12787|COX5A_MOUSE Cytochrome c oxidase subunit 5A, mitochondrial OS=Mus musculus OX=10090 GN=Cox5a PE=1 SV=2	1	3	3	3	1	3	1	3	1	3	27.4	27.4	27.4	16.101	146	146	0	19.531	By matching	By MS/MS	10.3	27.4	79103000	4527900	74575000	7191200	411620	6779600	0	42590000	0	4	4				114	1497;2645;4610	True;True;True	1592;1593;2814;4924	3891;3892;3893;7200;12638	3413;3414;6462;11204
P12815	P12815	3	3	3	Programmed cell death protein 6	Pdcd6	sp|P12815|PDCD6_MOUSE Programmed cell death protein 6 OS=Mus musculus OX=10090 GN=Pdcd6 PE=1 SV=2	1	3	3	3	1	3	1	3	1	3	16.8	16.8	16.8	21.867	191	191	0	20.168	By matching	By MS/MS	6.8	16.8	48766000	4231000	44535000	4433300	384640	4048600	0	29752000	0	3	3				115	178;3203;4681	True;True;True	192;3442;4998	468;469;8845;12796	407;7873;11342
P12970	P12970	25	25	25	60S ribosomal protein L7a	Rpl7a	sp|P12970|RL7A_MOUSE 60S ribosomal protein L7a OS=Mus musculus OX=10090 GN=Rpl7a PE=1 SV=2	1	25	25	25	25	24	25	24	25	24	53.4	53.4	53.4	29.976	266	266	0	323.31	By MS/MS	By MS/MS	53.4	53	183710000000	109290000000	74418000000	16701000000	9935300000	6765300000	108500000000	49774000000	55	50	105				117	179;180;1337;1739;2212;2261;2262;2272;2273;2298;2471;2558;2901;2994;2995;3318;3380;3844;3845;4016;4017;4148;4149;4434;4534	True;True;True;True;True;True;True;True;True;True;True;True;True;True;True;True;True;True;True;True;True;True;True;True;True	193;194;1428;1852;2354;2355;2407;2408;2418;2419;2444;2629;2721;3093;3216;3217;3561;3627;4117;4118;4297;4298;4439;4440;4739;4845	470;471;472;473;474;475;476;477;3491;3492;3493;3494;4569;4570;4571;4572;4573;4574;4575;5976;5977;5978;5979;5980;5981;5982;5983;6158;6159;6160;6161;6162;6163;6164;6165;6166;6167;6195;6196;6197;6198;6199;6200;6255;6256;6257;6258;6715;6716;6947;6948;6949;6950;6951;6952;6953;6954;6955;6956;6957;6958;7955;7956;7957;8265;8266;8267;8268;8269;8270;9138;9139;9338;9339;9340;9341;10601;10602;10603;10604;106…	408;409;410;411;412;413;414;415;416;417;418;3056;3057;3058;4022;4023;4024;4025;4026;5312;5313;5314;5315;5316;5317;5318;5476;5477;5478;5479;5480;5481;5482;5483;5484;5485;5507;5508;5509;5510;5511;5558;5559;5560;5561;5562;5971;5972;6188;6189;6190;6191;6192;6193;6194;6195;6196;6197;6198;6199;6200;6201;6202;7098;7099;7100;7365;7366;7367;7368;7369;7370;7371;7372;7373;8128;8129;8287;8288;8289;8290;9369;…
P13634	P13634	12	12	12	Carbonic anhydrase 1	Ca1	sp|P13634|CAH1_MOUSE Carbonic anhydrase 1 OS=Mus musculus OX=10090 GN=Ca1 PE=1 SV=4	1	12	12	12	11	12	11	12	11	12	75.5	75.5	75.5	28.33	261	261	0	323.31	By MS/MS	By MS/MS	66.3	75.5	8913600000	1376800000	7536800000	636690000	98343000	538350000	1357900000	4963900000	14	24	38				118	69;367;700;900;1394;1477;2796;2871;4051;4252;4330;4738	True;True;True;True;True;True;True;True;True;True;True;True	71;72;400;753;963;1487;1571;2976;3055;4333;4546;4628;5062	149;150;151;152;153;1001;1002;1855;1856;1857;1858;1859;2365;2366;2367;2368;2369;2370;3622;3623;3841;3842;3843;3844;3845;7617;7618;7853;7854;11169;11170;11171;11172;11173;11174;11740;11741;11949;11950;12938;12939;12940;12941;12942;12943	130;131;132;133;134;871;872;1614;1615;1616;1617;1618;2058;2059;2060;2061;3164;3165;3369;3370;3371;3372;3373;6806;6807;7015;7016;9890;9891;9892;9893;9894;10411;10595;10596;11470;11471;11472
P14115;P46776	P14115;P46776	9;7	9;7	8;6	60S ribosomal protein L27a	Rpl27a;RPL27A	sp|P14115|RL27A_MOUSE 60S ribosomal protein L27a OS=Mus musculus OX=10090 GN=Rpl27a PE=1 SV=5;sp|P46776|RL27A_HUMAN 60S ribosomal protein L27a OS=Homo sapiens OX=9606 GN=RPL27A PE=1 SV=2	2	9	9	8	8	9	8	9	7	8	33.1	33.1	33.1	16.605	148	148;148	0	135.93	By MS/MS	By MS/MS	33.1	33.1	70880000000	33651000000	37229000000	10126000000	4807300000	5318400000	24015000000	34492000000	14	24	38				119	1962;2860;3038;3113;3114;3416;3417;3910;4669	True;True;True;True;True;True;True;True;True	2087;3043;3263;3345;3346;3667;3668;4188;4986	5243;5244;5245;5246;5247;5248;7826;7827;7828;7829;7830;8420;8421;8616;8617;8618;8619;8620;8621;8622;8623;8624;9455;9456;9457;9458;9459;10802;10803;10804;10805;10806;12770;12771	4645;4646;4647;4648;4649;4650;4651;4652;6992;6993;6994;6995;6996;6997;7512;7677;7678;7679;7680;7681;7682;7683;7684;8380;8381;8382;8383;8384;9552;9553;9554;9555;9556;9557;9558;9559;9560;9561;9562;11316;11317
P14131	P14131	17	17	14	40S ribosomal protein S16	Rps16	sp|P14131|RS16_MOUSE 40S ribosomal protein S16 OS=Mus musculus OX=10090 GN=Rps16 PE=1 SV=4	1	17	17	14	17	17	17	17	14	14	63.7	63.7	52.1	16.445	146	146	0	161.27	By MS/MS	By MS/MS	63.7	63.7	149810000000	73848000000	75959000000	13619000000	6713400000	6905400000	74708000000	49592000000	55	62	117				120	292;602;886;1008;1081;1387;1530;2114;2586;2587;3179;3188;3978;3979;3989;4314;4409	True;True;True;True;True;True;True;True;True;True;True;True;True;True;True;True;True	318;646;949;1076;1150;1479;1629;2250;2750;2751;3415;3424;3425;4258;4259;4270;4612;4713;4714	793;794;1573;1574;1575;1576;2318;2319;2320;2321;2322;2323;2324;2325;2633;2634;2802;2803;3601;3602;3603;3604;3605;3606;3973;3974;3975;3976;3977;3978;3979;5671;5672;5673;5674;7032;7033;7034;7035;7036;7037;7038;7039;7040;7041;7042;7043;7044;7045;7046;7047;7048;7049;7050;7051;7052;7053;7054;7055;7056;7057;8782;8783;8799;8800;8801;8802;8803;8804;10976;10977;10978;10979;11004;11005;11914;11915;11916;11…	684;1365;1366;1367;2017;2018;2019;2020;2021;2022;2023;2024;2288;2289;2433;2434;2435;2436;3147;3148;3149;3150;3479;3480;3481;3482;3483;3484;5041;5042;5043;5044;6267;6268;6269;6270;6271;6272;6273;6274;6275;6276;6277;6278;6279;6280;6281;6282;6283;6284;6285;6286;6287;6288;6289;6290;6291;6292;6293;6294;6295;6296;6297;6298;6299;6300;6301;6302;6303;6304;6305;6306;6307;6308;6309;6310;6311;6312;6313;6314;…
P14148	P14148	29	29	29	60S ribosomal protein L7	Rpl7	sp|P14148|RL7_MOUSE 60S ribosomal protein L7 OS=Mus musculus OX=10090 GN=Rpl7 PE=1 SV=2	1	29	29	29	28	29	28	29	28	29	59.6	59.6	59.6	31.419	270	270	0	323.31	By MS/MS	By MS/MS	59.6	59.6	161690000000	97518000000	64177000000	12438000000	7501400000	4936700000	95567000000	43639000000	59	48	107				121	170;376;790;1139;1140;1162;1756;2045;2078;2178;2266;2267;2274;2284;2285;2286;2728;2887;3247;3381;3412;3788;3789;4071;4072;4155;4156;4423;4424	True;True;True;True;True;True;True;True;True;True;True;True;True;True;True;True;True;True;True;True;True;True;True;True;True;True;True;True;True	184;409;410;846;1209;1210;1211;1212;1236;1872;2176;2210;2318;2412;2413;2420;2430;2431;2432;2905;3073;3488;3628;3663;4060;4061;4357;4358;4446;4447;4728;4729	450;451;1021;1022;1023;1024;2085;2086;2087;2088;2939;2940;2941;2942;2943;2944;2945;2946;2947;2948;2994;2995;2996;2997;2998;4641;4642;4643;4644;4645;5470;5471;5472;5473;5474;5475;5476;5477;5478;5479;5480;5481;5482;5483;5484;5485;5565;5566;5567;5568;5866;5867;6175;6176;6177;6178;6179;6180;6181;6182;6183;6201;6202;6203;6204;6223;6224;6225;6226;6227;6228;6229;6230;7421;7422;7423;7424;7918;7919;8953;8…	393;888;889;890;1807;1808;1809;1810;1811;2579;2580;2581;2582;2583;2584;2585;2586;2587;2588;2622;2623;2624;2625;2626;2627;4100;4101;4102;4103;4104;4105;4851;4852;4853;4854;4855;4856;4857;4858;4859;4860;4861;4862;4863;4864;4865;4866;4867;4868;4939;4940;4941;4942;4943;4944;4945;5220;5221;5491;5492;5493;5494;5495;5496;5497;5512;5513;5514;5515;5532;5533;5534;5535;5536;5537;6648;6649;6650;7071;7072;796…
P14152;P40925	P14152;P40925	6;5	6;5	6;5	Malate dehydrogenase, cytoplasmic	Mdh1;MDH1	sp|P14152|MDHC_MOUSE Malate dehydrogenase, cytoplasmic OS=Mus musculus OX=10090 GN=Mdh1 PE=1 SV=3;sp|P40925|MDHC_HUMAN Malate dehydrogenase, cytoplasmic OS=Homo sapiens OX=9606 GN=MDH1 PE=1 SV=4	2	6	6	6	3	6	3	6	3	6	26.3	26.3	26.3	36.511	334	334;334	0	85.155	By MS/MS	By MS/MS	14.4	26.3	298760000	37615000	261150000	21340000	2686800	18653000	50558000	161520000	0	4	4				122	967;979;1055;1267;3141;4308	True;True;True;True;True;True	1031;1044;1124;1356;3375;4605	2544;2545;2573;2740;3314;3315;8681;8682;11888	2215;2237;2380;2911;7727;10540
P14206	P14206	20	20	20	40S ribosomal protein SA	Rpsa	sp|P14206|RSSA_MOUSE 40S ribosomal protein SA OS=Mus musculus OX=10090 GN=Rpsa PE=1 SV=4	1	20	20	20	20	20	20	20	20	20	64.1	64.1	64.1	32.838	295	295	0	323.31	By MS/MS	By MS/MS	64.1	64.1	114940000000	63819000000	51122000000	8841600000	4909200000	3932500000	59413000000	35607000000	58	63	121				123	75;216;683;869;870;1078;1168;1169;1254;1255;1305;2248;2249;2637;3391;3482;3483;3518;3519;4767	True;True;True;True;True;True;True;True;True;True;True;True;True;True;True;True;True;True;True;True	78;236;736;930;931;932;933;1147;1244;1245;1246;1247;1342;1343;1394;1395;1396;2393;2394;2805;3639;3736;3737;3779;3780;3781;3782;5092	178;179;180;181;182;183;184;185;600;601;602;603;604;605;606;1825;1826;1827;1828;2272;2273;2274;2275;2276;2277;2278;2279;2280;2281;2282;2283;2284;2285;2286;2793;2794;2795;2796;2797;2798;3021;3022;3023;3024;3025;3026;3027;3028;3029;3030;3031;3032;3033;3034;3035;3269;3270;3271;3272;3273;3274;3275;3276;3277;3278;3404;3405;3406;3407;3408;3409;3410;3411;6110;6111;6112;6113;6114;6115;6116;6117;6118;6119…	154;155;156;157;158;159;160;161;532;533;534;535;536;537;538;539;1589;1590;1591;1592;1979;1980;1981;1982;1983;1984;1985;1986;1987;1988;1989;1990;2424;2425;2426;2427;2428;2429;2430;2650;2651;2652;2653;2654;2655;2656;2657;2658;2659;2660;2661;2662;2663;2863;2864;2865;2866;2867;2868;2869;2870;2871;2872;2873;2874;2875;2876;2987;2988;2989;2990;2991;2992;2993;5432;5433;5434;5435;5436;5437;5438;5439;5440;…
P14211	P14211	12	12	12	Calreticulin	Calr	sp|P14211|CALR_MOUSE Calreticulin OS=Mus musculus OX=10090 GN=Calr PE=1 SV=1	1	12	12	12	10	12	10	12	10	12	44.2	44.2	44.2	47.994	416	416	0	113.05	By MS/MS	By MS/MS	36.1	44.2	1412200000	463530000	948700000	58843000	19314000	39529000	448250000	649060000	4	12	16				124	491;667;1000;1120;1285;1545;1776;1784;1907;2223;2446;4272	True;True;True;True;True;True;True;True;True;True;True;True	529;715;1068;1190;1374;1645;1892;1900;2027;2366;2604;4567	1277;1756;1757;2614;2615;2889;2890;3364;3365;4017;4685;4686;4687;4688;4702;4703;5064;5065;5066;5067;6013;6014;6656;6657;11807;11808	1107;1519;2272;2524;2955;2956;3515;4136;4137;4138;4151;4152;4481;4482;5344;5920;10471
P14685	P14685	2	2	2	26S proteasome non-ATPase regulatory subunit 3	Psmd3	sp|P14685|PSMD3_MOUSE 26S proteasome non-ATPase regulatory subunit 3 OS=Mus musculus OX=10090 GN=Psmd3 PE=1 SV=3	1	2	2	2	2	2	2	2	2	2	5.3	5.3	5.3	60.718	530	530	0	12.524	By MS/MS	By MS/MS	5.3	5.3	13712000	5398700	8313700	403310	158790	244520	5016800	5936000	2	2	4				125	1634;3637	True;True	1736;3906	4210;4211;10080;10081	3677;3678;8931;8932
P14719	P14719	2	2	2	Interleukin-1 receptor-like 1	Il1rl1	sp|P14719|ILRL1_MOUSE Interleukin-1 receptor-like 1 OS=Mus musculus OX=10090 GN=Il1rl1 PE=1 SV=2	1	2	2	2	2	0	2	0	2	0	6.2	6.2	6.2	64.801	567	567	0	15.259	By MS/MS		6.2	0	25349000	25349000	0	874110	874110	0	25349000	0	2	0	2				126	647;2722	True;True	691;2899	1701;7401	1473;6630
P14869	P14869	21	21	21	60S acidic ribosomal protein P0	Rplp0	sp|P14869|RLA0_MOUSE 60S acidic ribosomal protein P0 OS=Mus musculus OX=10090 GN=Rplp0 PE=1 SV=3	1	21	21	21	21	19	21	19	21	19	55.2	55.2	55.2	34.216	317	317	0	323.31	By MS/MS	By MS/MS	55.2	53.3	62407000000	32112000000	30295000000	4800500000	2470100000	2330400000	31109000000	20338000000	39	40	79				127	99;130;131;145;146;463;483;670;671;822;823;824;1401;1402;1512;1513;1514;1580;1888;4052;4310	True;True;True;True;True;True;True;True;True;True;True;True;True;True;True;True;True;True;True;True;True	105;106;140;141;156;157;500;521;720;721;722;880;881;882;883;884;1494;1495;1610;1611;1612;1613;1680;2007;4334;4608	248;249;250;251;348;349;350;351;352;353;354;355;387;388;389;390;391;1214;1215;1257;1258;1259;1260;1261;1262;1263;1773;1774;1775;1776;1777;1778;1779;2173;2174;2175;2176;2177;2178;2179;2180;2181;2182;2183;2184;2185;2186;2187;2188;2189;2190;3641;3642;3643;3644;3645;3931;3932;3933;3934;3935;3936;3937;3938;3939;3940;4090;4091;4092;4093;4094;4095;4992;4993;4994;4995;4996;4997;4998;4999;5000;11175;11176…	211;212;213;302;303;304;305;306;307;335;336;337;338;339;1052;1053;1088;1089;1090;1091;1092;1093;1094;1095;1096;1533;1534;1535;1536;1537;1891;1892;1893;1894;1895;1896;1897;1898;1899;1900;1901;1902;1903;1904;1905;1906;1907;1908;3183;3184;3185;3186;3187;3444;3445;3446;3447;3448;3449;3450;3451;3452;3577;3578;3579;3580;3581;4404;4405;4406;4407;4408;4409;4410;4411;4412;9895;9896;9897;9898;9899;10555;10…
Q02257;P14923;Q02248;P35222	Q02257;P14923	9;9;1;1	9;9;1;1	9;9;1;1	Junction plakoglobin	Jup;JUP	sp|Q02257|PLAK_MOUSE Junction plakoglobin OS=Mus musculus OX=10090 GN=Jup PE=1 SV=3;sp|P14923|PLAK_HUMAN Junction plakoglobin OS=Homo sapiens OX=9606 GN=JUP PE=1 SV=3	4	9	9	9	8	8	8	8	8	8	17	17	17	81.8	745	745;745;781;781	0	60.555	By MS/MS	By MS/MS	14.6	15.4	210920000	165110000	45809000	4585200	3589300	995840	161470000	34238000	5	1	6				128	149;274;2617;2618;2838;2839;3042;3461;4003	True;True;True;True;True;True;True;True;True	160;297;2783;2784;3020;3021;3267;3715;4284	397;398;751;752;7132;7133;7134;7772;7773;7774;7775;8431;8432;9600;9601;11056	345;654;6402;6403;6944;6945;7520;8518;8519;9796
P15508	P15508	8	8	8	Spectrin beta chain, erythrocytic	Sptb	sp|P15508|SPTB1_MOUSE Spectrin beta chain, erythrocytic OS=Mus musculus OX=10090 GN=Sptb PE=1 SV=4	1	8	8	8	0	8	0	8	0	8	5.1	5.1	5.1	245.25	2128	2128	0	56.896		By MS/MS	0	5.1	30237000	0	30237000	238090	0	238090	0	20200000	0	7	7				129	210;531;575;637;1176;1677;2859;3273	True;True;True;True;True;True;True;True	228;571;616;681;1256;1784;3042;3514	570;1373;1497;1671;3054;4359;7825;9025	503;1192;1303;1446;2681;3830;6991;8034
P15532	P15532	4	4	3	Nucleoside diphosphate kinase A	Nme1	sp|P15532|NDKA_MOUSE Nucleoside diphosphate kinase A OS=Mus musculus OX=10090 GN=Nme1 PE=1 SV=1	1	4	4	3	0	4	0	4	0	3	34.2	34.2	23	17.208	152	152	0	27.79		By MS/MS	0	34.2	97422000	0	97422000	9742200	0	9742200	0	65083000	0	4	4				130	690;896;1191;4401	True;True;True;True	743;959;1271;4704	1839;2358;3086;12131	1602;2051;2708;10762
P15864;P16403;P10412;P16402;P22492;Q07133;Q02539	P15864;P16403;P10412;P16402	9;6;6;6;3;3;3	9;6;6;6;3;3;3	3;0;0;0;0;0;0	Histone H1.2;Histone H1.4;Histone H1.3	Hist1h1c;HIST1H1C;HIST1H1E;HIST1H1D	sp|P15864|H12_MOUSE Histone H1.2 OS=Mus musculus OX=10090 GN=Hist1h1c PE=1 SV=2;sp|P16403|H12_HUMAN Histone H1.2 OS=Homo sapiens OX=9606 GN=HIST1H1C PE=1 SV=2;sp|P10412|H14_HUMAN Histone H1.4 OS=Homo sapiens OX=9606 GN=HIST1H1E PE=1 SV=2;sp|P16402|H13_HUMA	7	9	9	3	8	9	8	9	3	3	30.7	30.7	12.7	21.266	212	212;213;219;221;207;208;215	0	64.488	By MS/MS	By MS/MS	30.2	30.7	3206000000	1242200000	1963800000	356230000	138030000	218200000	1370700000	1183500000	8	9	17				131	234;235;374;1428;2084;2088;3492;3493;3541	True;True;True;True;True;True;True;True;True	256;257;407;1522;2217;2222;3750;3751;3806	651;652;653;654;655;656;1017;1018;3705;3706;5585;5598;5599;9680;9681;9682;9683;9684;9685;9815;9816	576;577;578;579;580;581;885;3235;3236;4962;4974;8587;8588;8589;8590;8699;8700
P16045	P16045	2	2	2	Galectin-1	Lgals1	sp|P16045|LEG1_MOUSE Galectin-1 OS=Mus musculus OX=10090 GN=Lgals1 PE=1 SV=3	1	2	2	2	1	2	1	2	1	2	24.4	24.4	24.4	14.866	135	135	0	48.645	By matching	By MS/MS	11.1	24.4	89552000	2825100	86727000	9950300	313900	9636300	0	57939000	0	2	2				132	55;1204	True;True	57;1289	119;3147;3148;3149	102;2757;2758
P43276;P16401	P43276;P16401	3;3	3;3	3;3	Histone H1.5	Hist1h1b;HIST1H1B	sp|P43276|H15_MOUSE Histone H1.5 OS=Mus musculus OX=10090 GN=Hist1h1b PE=1 SV=2;sp|P16401|H15_HUMAN Histone H1.5 OS=Homo sapiens OX=9606 GN=HIST1H1B PE=1 SV=3	2	3	3	3	3	3	3	3	3	3	10.8	10.8	10.8	22.576	223	223;226	0	21.281	By MS/MS	By MS/MS	10.8	10.8	775040000	335630000	439410000	86116000	37292000	48824000	342930000	286250000	4	4	8				133	238;409;2089	True;True;True	260;443;2223	663;664;1080;1081;5600;5601;5602;5603	586;587;937;938;4975;4976;4977;4978
P16858;Q5E924;Q64467	P16858	12;2;2	12;2;2	7;1;1	Glyceraldehyde-3-phosphate dehydrogenase	Gapdh	sp|P16858|G3P_MOUSE Glyceraldehyde-3-phosphate dehydrogenase OS=Mus musculus OX=10090 GN=Gapdh PE=1 SV=2	3	12	12	7	10	12	10	12	6	7	53.8	53.8	33.9	35.81	333	333;420;440	0	157.17	By MS/MS	By MS/MS	47.4	53.8	1322700000	321420000	1001300000	82670000	20089000	62581000	328380000	646480000	7	13	20				134	1294;2054;2531;2776;2820;4256;4283;4286;4287;4438;4518;4580	True;True;True;True;True;True;True;True;True;True;True;True	1383;2186;2693;2953;3001;4550;4578;4579;4582;4583;4743;4828;4892	3381;3382;5509;5510;6861;6862;7539;7540;7728;7729;11751;11752;11830;11831;11832;11833;11834;11839;11840;11841;12231;12232;12233;12234;12419;12420;12572	2967;2968;4887;4888;6110;6111;6743;6912;10420;10490;10491;10492;10495;10496;10854;10855;10856;10857;11012;11151
P17182;P06733;P17183;P21550	P17182;P06733	16;10;3;2	16;10;3;2	16;10;3;2	Alpha-enolase	Eno1;ENO1	sp|P17182|ENOA_MOUSE Alpha-enolase OS=Mus musculus OX=10090 GN=Eno1 PE=1 SV=3;sp|P06733|ENOA_HUMAN Alpha-enolase OS=Homo sapiens OX=9606 GN=ENO1 PE=1 SV=2	4	16	16	16	12	16	12	16	12	16	55.3	55.3	55.3	47.14	434	434;434;434;434	0	187.67	By MS/MS	By MS/MS	40.1	55.3	2021600000	448430000	1573100000	91890000	20383000	71507000	485120000	1000700000	9	22	31				135	48;49;532;1247;1509;1601;1663;1829;2336;3476;3516;3523;3533;3534;4416;4682	True;True;True;True;True;True;True;True;True;True;True;True;True;True;True;True	50;51;572;1334;1607;1702;1767;1946;2484;2485;2486;3730;3776;3787;3797;3798;4721;4999	103;104;105;106;107;108;1374;1375;3245;3246;3247;3248;3924;3925;4142;4305;4306;4307;4829;4830;6354;6355;6356;6357;6358;6359;6360;6361;6362;6363;9631;9745;9779;9795;9796;9797;9798;9799;9800;12181;12182;12797;12798	86;87;88;89;90;91;1193;1194;2845;2846;2847;3438;3621;3775;3776;3777;4267;5648;5649;5650;5651;5652;8545;8640;8670;8684;8685;8686;10809;10810;11343;11344
P17225	P17225	2	2	2	Polypyrimidine tract-binding protein 1	Ptbp1	sp|P17225|PTBP1_MOUSE Polypyrimidine tract-binding protein 1 OS=Mus musculus OX=10090 GN=Ptbp1 PE=1 SV=2	1	2	2	2	2	2	2	2	2	2	8.2	8.2	8.2	56.477	527	527	0	20.919	By MS/MS	By MS/MS	8.2	8.2	52359000	14712000	37647000	2618000	735590	1882400	16302000	23560000	1	4	5				136	1752;2205	True;True	1868;2347	4621;4622;4623;5961;5962	4068;4069;4070;4071;5300
P17563;Q63836	P17563;Q63836	5;4	5;4	5;4	Selenium-binding protein 1;Selenium-binding protein 2	Selenbp1;Selenbp2	sp|P17563|SBP1_MOUSE Methanethiol oxidase OS=Mus musculus OX=10090 GN=Selenbp1 PE=1 SV=2;sp|Q63836|SBP2_MOUSE Selenium-binding protein 2 OS=Mus musculus OX=10090 GN=Selenbp2 PE=1 SV=2	2	5	5	5	3	5	3	5	3	5	12.5	12.5	12.5	52.513	472	472;472	0	31.315	By MS/MS	By MS/MS	5.9	12.5	115610000	23236000	92374000	3729300	749550	2979800	24337000	60610000	1	4	5				137	1828;2522;2862;3129;3691	True;True;True;True;True	1945;2684;3045;3363;3962	4827;4828;6842;6843;7833;8657;10211;10212	4266;6094;6095;7000;7712;9040
P17742;Q38867	P17742	10;1	10;1	10;1	Peptidyl-prolyl cis-trans isomerase A;Peptidyl-prolyl cis-trans isomerase A, N-terminally processed	Ppia	sp|P17742|PPIA_MOUSE Peptidyl-prolyl cis-trans isomerase A OS=Mus musculus OX=10090 GN=Ppia PE=1 SV=2	2	10	10	10	8	10	8	10	8	10	66.5	66.5	66.5	17.971	164	164;176	0	137.96	By MS/MS	By MS/MS	50	66.5	5189400000	236810000	4952600000	518940000	23681000	495260000	188250000	3244400000	6	18	24				138	861;1109;1729;1884;2169;3578;4311;4414;4469;4470	True;True;True;True;True;True;True;True;True;True	922;1179;1842;2002;2003;2309;3846;4609;4719;4777;4778	2256;2872;2873;4550;4979;4980;4981;4982;4983;5839;5840;9897;9898;9899;9900;11905;11906;11907;12170;12171;12172;12173;12315;12316;12317;12318;12319;12320	1964;2510;4009;4392;4393;4394;4395;4396;5199;8765;8766;8767;8768;10557;10558;10794;10795;10796;10797;10925;10926;10927;10928;10929
P17751;P48491;Q9SKP6	P17751	12;1;1	12;1;1	12;1;1	Triosephosphate isomerase	Tpi1	sp|P17751|TPIS_MOUSE Triosephosphate isomerase OS=Mus musculus OX=10090 GN=Tpi1 PE=1 SV=4	3	12	12	12	9	12	9	12	9	12	48.8	48.8	48.8	32.191	299	299;254;315	0	127.06	By MS/MS	By MS/MS	40.8	48.8	1601400000	203270000	1398100000	84284000	10699000	73585000	297830000	832880000	3	18	21				139	636;918;919;1130;1734;1765;1903;3379;3835;4273;4472;4527	True;True;True;True;True;True;True;True;True;True;True;True	680;981;982;1200;1847;1881;2023;3626;4108;4568;4780;4837	1667;1668;1669;1670;2415;2416;2417;2418;2419;2916;2917;4558;4559;4560;4663;5053;5054;9335;9336;9337;10579;11809;11810;12322;12323;12324;12439;12440;12441;12442	1443;1444;1445;2102;2103;2104;2105;2561;4014;4015;4120;4472;4473;8285;8286;9349;10472;10931;10932;11024;11025;11026
P17918	P17918	2	2	2	Proliferating cell nuclear antigen	Pcna	sp|P17918|PCNA_MOUSE Proliferating cell nuclear antigen OS=Mus musculus OX=10090 GN=Pcna PE=1 SV=2	1	2	2	2	1	2	1	2	1	2	12.3	12.3	12.3	28.785	261	261	0	30.886	By matching	By MS/MS	7.3	12.3	82855000	8782600	74073000	5178500	548910	4629500	10974000	47293000	0	3	3				140	101;1229	True;True	108;1316	258;259;260;261;3212	218;219;2816
P18760	P18760	9	9	9	Cofilin-1	Cfl1	sp|P18760|COF1_MOUSE Cofilin-1 OS=Mus musculus OX=10090 GN=Cfl1 PE=1 SV=3	1	9	9	9	3	9	3	9	3	9	60.2	60.2	60.2	18.559	166	166	0	121.34	By MS/MS	By MS/MS	22.3	60.2	807400000	33322000	774080000	80740000	3332200	77408000	35896000	514550000	1	13	14				141	375;449;891;1017;1638;2096;2106;2470;3013	True;True;True;True;True;True;True;True;True	408;485;954;1086;1740;2230;2241;2628;3237	1019;1020;1181;1182;2349;2350;2667;2668;4218;5617;5618;5650;6713;6714;8349;8350	886;887;1023;2045;2046;2321;2322;3683;4991;4992;5021;5970;7451;7452
P19096	P19096	3	3	3	Fatty acid synthase;[Acyl-carrier-protein] S-acetyltransferase;[Acyl-carrier-protein] S-malonyltransferase;3-oxoacyl-[acyl-carrier-protein] synthase;3-oxoacyl-[acyl-carrier-protein] reductase;3-hydroxyacyl-[acyl-carrier-protein] dehydratase;Enoyl-[acyl-carrier-protein] reductase;Oleoyl-[acyl-carrier-protein] hydrolase	Fasn	sp|P19096|FAS_MOUSE Fatty acid synthase OS=Mus musculus OX=10090 GN=Fasn PE=1 SV=2	1	3	3	3	1	3	1	3	1	3	1.7	1.7	1.7	272.43	2504	2504	0	17.029	By matching	By MS/MS	0.5	1.7	14209000	4111400	10097000	120410	34842	85569	0	6745500	0	4	4				142	1099;2391;2611	True;True;True	1168;2545;2775	2836;6522;6523;7108;7109	2469;5791;6379;6380
P19157;P46425	P19157;P46425	2;1	2;1	2;1	Glutathione S-transferase P 1;Glutathione S-transferase P 2	Gstp1;Gstp2	sp|P19157|GSTP1_MOUSE Glutathione S-transferase P 1 OS=Mus musculus OX=10090 GN=Gstp1 PE=1 SV=2;sp|P46425|GSTP2_MOUSE Glutathione S-transferase P 2 OS=Mus musculus OX=10090 GN=Gstp2 PE=1 SV=2	2	2	2	2	0	2	0	2	0	2	12.9	12.9	12.9	23.609	210	210;210	0	21.819		By MS/MS	0	12.9	65375000	0	65375000	5447900	0	5447900	0	43674000	0	2	2				143	1110;3185	True;True	1180;3421	2874;8795	2511;7829
P19253;P40429	P19253;P40429	19;12	19;12	19;12	60S ribosomal protein L13a	Rpl13a;RPL13A	sp|P19253|RL13A_MOUSE 60S ribosomal protein L13a OS=Mus musculus OX=10090 GN=Rpl13a PE=1 SV=4;sp|P40429|RL13A_HUMAN 60S ribosomal protein L13a OS=Homo sapiens OX=9606 GN=RPL13A PE=1 SV=2	2	19	19	19	19	16	19	16	19	16	62.6	62.6	62.6	23.464	203	203;203	0	182.4	By MS/MS	By MS/MS	62.6	52.7	70450000000	36213000000	34237000000	7827800000	4023700000	3804100000	34264000000	19414000000	49	30	79				144	108;109;480;1250;2118;2311;2328;2555;2556;2562;2927;2952;3409;4334;4335;4690;4726;4727;4728	True;True;True;True;True;True;True;True;True;True;True;True;True;True;True;True;True;True;True	116;117;118;119;518;1337;2254;2458;2476;2718;2719;2725;3132;3133;3170;3659;3660;4633;4634;5008;5050;5051;5052	284;285;286;287;288;289;290;291;292;293;294;295;296;297;298;299;1249;1250;1251;1252;3252;3253;5682;5683;6301;6302;6340;6341;6926;6927;6928;6929;6930;6931;6932;6933;6934;6935;6936;6937;6938;6939;6969;6970;8058;8059;8060;8144;8145;9431;9432;9433;9434;11959;11960;11961;11962;11963;11964;11965;11966;11967;11968;11969;11970;11971;11972;12821;12822;12913;12914;12915;12916;12917;12918;12919	242;243;244;245;246;247;248;249;250;251;252;253;254;255;256;257;1081;1082;1083;2850;5051;5052;5607;5638;5639;6167;6168;6169;6170;6171;6172;6173;6174;6175;6176;6177;6178;6179;6180;6211;7187;7188;7189;7261;7262;8360;8361;8362;8363;10603;10604;10605;10606;10607;10608;10609;10610;10611;10612;10613;10614;10615;10616;10617;10618;10619;10620;10621;10622;10623;10624;11364;11365;11449;11450;11451;11452;11…
P19783	P19783	4	4	4	Cytochrome c oxidase subunit 4 isoform 1, mitochondrial	Cox4i1	sp|P19783|COX41_MOUSE Cytochrome c oxidase subunit 4 isoform 1, mitochondrial OS=Mus musculus OX=10090 GN=Cox4i1 PE=1 SV=2	1	4	4	4	3	4	3	4	3	4	29	29	29	19.53	169	169	0	33.24	By matching	By MS/MS	18.3	29	379800000	36603000	343200000	34528000	3327600	31200000	44259000	221620000	0	5	5				145	96;318;764;3496	True;True;True;True	102;346;818;3754	240;241;869;870;2033;9691;9692;9693	204;748;1768;8596;8597
P20029;Q8H1B3;Q9LDZ0;Q8GUM2	P20029	30;2;1;1	28;2;1;1	26;2;0;0	78 kDa glucose-regulated protein	Hspa5	sp|P20029|BIP_MOUSE Endoplasmic reticulum chaperone BiP OS=Mus musculus OX=10090 GN=Hspa5 PE=1 SV=3	4	30	28	26	19	30	17	28	17	26	47.3	45.6	44	72.421	655	655;675;682;682	0	323.31	By MS/MS	By MS/MS	35.7	47.3	5746700000	543120000	5203600000	191560000	18104000	173450000	549530000	3419600000	11	46	57				146	227;525;673;840;925;1113;1802;1810;1811;1880;1882;2031;2172;2250;2258;2263;2292;2867;2906;2987;3111;3484;3705;3880;3953;4113;4201;4343;4400;4493	True;True;True;True;True;True;True;True;True;False;True;True;True;True;True;True;True;True;True;True;True;True;True;True;True;True;False;True;True;True	247;248;565;725;901;988;1183;1919;1927;1928;1998;2000;2162;2312;2395;2404;2409;2438;3051;3100;3207;3343;3738;3977;4155;4156;4233;4403;4494;4642;4702;4703;4801	625;626;627;628;629;630;1358;1787;1788;1789;2220;2430;2431;2878;4776;4788;4789;4790;4791;4964;4965;4966;4967;4971;4972;4973;4974;5435;5436;5437;5438;5845;5846;5847;5848;6126;6127;6128;6129;6151;6152;6168;6243;7843;7844;7971;8241;8242;8614;9647;9648;9649;9650;10247;10248;10249;10250;10723;10724;10725;10726;10727;10728;10729;10730;10921;10922;10923;10924;11378;11379;11611;11612;11986;11987;12129;12…	554;555;556;557;1179;1550;1551;1552;1553;1933;2114;2115;2515;4223;4232;4233;4234;4379;4380;4381;4382;4385;4386;4387;4816;4817;4818;4819;5203;5204;5205;5445;5446;5447;5448;5469;5470;5486;5548;5549;7008;7111;7344;7675;8560;8561;9074;9075;9076;9077;9479;9480;9481;9482;9671;9672;10087;10294;10295;10635;10760;10761;10961;10962;10963
P20108	P20108	2	2	2	Thioredoxin-dependent peroxide reductase, mitochondrial	Prdx3	sp|P20108|PRDX3_MOUSE Thioredoxin-dependent peroxide reductase, mitochondrial OS=Mus musculus OX=10090 GN=Prdx3 PE=1 SV=1	1	2	2	2	2	2	2	2	2	2	10.1	10.1	10.1	28.127	257	257	0	14.269	By matching	By MS/MS	10.1	10.1	54340000	5071000	49269000	3196500	298290	2898200	4740100	33245000	0	2	2				147	755;1465	True;True	809;1559	1997;1998;3818;3819	1730;3351
P21107;P58771;CON__Q3SX28;P58774	P21107;P58771	5;3;2;2	5;3;2;2	5;3;2;2	Tropomyosin alpha-3 chain;Tropomyosin alpha-1 chain	Tpm3;Tpm1	sp|P21107|TPM3_MOUSE Tropomyosin alpha-3 chain OS=Mus musculus OX=10090 GN=Tpm3 PE=1 SV=3;sp|P58771|TPM1_MOUSE Tropomyosin alpha-1 chain OS=Mus musculus OX=10090 GN=Tpm1 PE=1 SV=1	4	5	5	5	1	5	1	5	1	5	17.5	17.5	17.5	32.994	285	285;284;284;284	0	38.783	By matching	By MS/MS	4.9	17.5	155190000	8206400	146980000	9699100	512900	9186200	0	98190000	0	6	6				148	4;1991;2890;3386;4745	True;True;True;True;True	4;2119;3078;3634;5069	5;5335;5336;7927;9359;9360;12954	4;4735;7078;8305;8306;11482
P23116	P23116	7	7	7	Eukaryotic translation initiation factor 3 subunit A	Eif3a	sp|P23116|EIF3A_MOUSE Eukaryotic translation initiation factor 3 subunit A OS=Mus musculus OX=10090 GN=Eif3a PE=1 SV=5	1	7	7	7	6	6	6	6	6	6	6.2	6.2	6.2	161.93	1344	1344	0	42.745	By MS/MS	By MS/MS	5.1	5.2	142240000	69616000	72620000	2452300	1200300	1252100	75449000	42681000	4	4	8				149	1243;2361;2411;2615;2800;3992;4363	True;True;True;True;True;True;True	1330;2511;2566;2779;2980;4273;4662	3237;3238;6436;6437;6570;6571;7118;7119;7635;11012;12030;12031	2839;2840;5714;5836;5837;6390;6391;6823;9740;10675
P23249	P23249	28	28	28	Putative helicase MOV-10	Mov10	sp|P23249|MOV10_MOUSE Putative helicase MOV-10 OS=Mus musculus OX=10090 GN=Mov10 PE=1 SV=2	1	28	28	28	28	26	28	26	28	26	36.6	36.6	36.6	113.58	1004	1004	0	271	By MS/MS	By MS/MS	36.6	33.8	2461100000	1377000000	1084100000	44747000	25037000	19711000	1401700000	699570000	31	24	55				150	184;578;854;862;1029;1121;1170;1330;1454;1455;1583;1600;1653;1758;2145;2389;2632;2633;3279;3618;3782;4107;4255;4265;4362;4566;4573;4605	True;True;True;True;True;True;True;True;True;True;True;True;True;True;True;True;True;True;True;True;True;True;True;True;True;True;True;True	198;620;915;923;1098;1191;1248;1421;1548;1549;1683;1701;1756;1874;2282;2543;2800;2801;3520;3887;4054;4397;4549;4560;4661;4878;4885;4918	486;487;1511;1512;2245;2257;2258;2259;2260;2695;2696;2697;2891;2892;3036;3037;3476;3477;3771;3772;3773;3774;3775;3776;4100;4101;4102;4103;4140;4141;4261;4262;4263;4264;4648;4649;5756;6519;6520;7167;7168;7169;7170;7171;7172;9036;9037;9038;9039;10039;10040;10470;10471;11357;11358;11749;11750;11790;11791;11792;11793;12028;12029;12542;12543;12554;12555;12628;12629	426;427;1314;1955;1965;1966;1967;1968;2345;2346;2525;2526;2664;2665;3044;3045;3301;3302;3303;3304;3585;3586;3587;3619;3620;3730;3731;4107;5124;5788;5789;6433;6434;6435;6436;6437;6438;8043;8044;8045;8046;8894;9261;9262;10067;10068;10418;10419;10456;10457;10458;10673;10674;11126;11127;11134;11135;11197
P24369	P24369	7	7	7	Peptidyl-prolyl cis-trans isomerase B	Ppib	sp|P24369|PPIB_MOUSE Peptidyl-prolyl cis-trans isomerase B OS=Mus musculus OX=10090 GN=Ppib PE=1 SV=2	1	7	7	7	1	7	1	7	1	7	40.3	40.3	40.3	23.713	216	216	0	51.145	By MS/MS	By MS/MS	6	40.3	315840000	17607000	298240000	26320000	1467200	24853000	0	199240000	1	7	8				151	622;715;1808;3579;4085;4288;4347	True;True;True;True;True;True;True	666;769;1925;3847;4371;4584;4646	1635;1897;4785;9901;11294;11295;11842;11994	1418;1649;4230;8769;10009;10010;10497;10641
P25444;P15880;Q9SCM3;Q93VB8;Q8L8Y0;P49688	P25444;P15880	20;17;2;2;2;2	20;17;2;2;2;2	20;17;2;2;2;2	40S ribosomal protein S2	Rps2;RPS2	sp|P25444|RS2_MOUSE 40S ribosomal protein S2 OS=Mus musculus OX=10090 GN=Rps2 PE=1 SV=3;sp|P15880|RS2_HUMAN 40S ribosomal protein S2 OS=Homo sapiens OX=9606 GN=RPS2 PE=1 SV=2	6	20	20	20	20	16	20	16	20	16	59.4	59.4	59.4	31.231	293	293;293;276;284;284;285	0	205.41	By MS/MS	By MS/MS	59.4	50.2	114880000000	63069000000	51808000000	6382100000	3503800000	2878200000	62697000000	33668000000	38	47	85				152	61;100;140;408;485;508;1039;1067;1325;1579;1838;1911;2204;2616;2745;2746;3611;3697;4122;4123	True;True;True;True;True;True;True;True;True;True;True;True;True;True;True;True;True;True;True;True	63;107;151;442;523;548;1108;1136;1416;1679;1955;2032;2344;2345;2346;2780;2781;2782;2922;2923;3880;3968;4412;4413	136;137;252;253;254;255;256;257;374;375;376;377;378;379;380;381;382;1077;1078;1079;1266;1267;1268;1326;2712;2764;2765;3468;4086;4087;4088;4089;4848;4849;4850;4851;5080;5081;5942;5943;5944;5945;5946;5947;5948;5949;5950;5951;5952;5953;5954;5955;5956;5957;5958;5959;5960;7120;7121;7122;7123;7124;7125;7126;7127;7128;7129;7130;7131;7460;7461;7462;7463;7464;7465;10015;10016;10017;10018;10019;10020;10021…	121;122;214;215;216;217;323;324;325;326;327;328;329;330;934;935;936;1099;1100;1150;2357;2402;3039;3573;3574;3575;3576;4280;4281;4282;4283;4492;5283;5284;5285;5286;5287;5288;5289;5290;5291;5292;5293;5294;5295;5296;5297;5298;5299;6392;6393;6394;6395;6396;6397;6398;6399;6400;6401;6678;6679;6680;6681;6682;6683;8870;8871;8872;8873;8874;8875;8876;8877;8878;8879;8880;8881;8882;9050;9051;9052;9053;9054;9…
P25976	P25976	2	2	2	Nucleolar transcription factor 1	Ubtf	sp|P25976|UBF1_MOUSE Nucleolar transcription factor 1 OS=Mus musculus OX=10090 GN=Ubtf PE=1 SV=1	1	2	2	2	1	2	1	2	1	2	3.4	3.4	3.4	89.508	765	765	0	15.313	By matching	By MS/MS	1.8	3.4	45126000	1294300	43831000	1327200	38067	1289200	0	29282000	0	2	2				153	1183;3997	True;True	1263;4278	3070;11045;11046	2695;9788
P26043	P26043	5	5	2	Radixin	Rdx	sp|P26043|RADI_MOUSE Radixin OS=Mus musculus OX=10090 GN=Rdx PE=1 SV=3	1	5	5	2	3	5	3	5	0	2	11.5	11.5	7	68.542	583	583	0	31.523	By MS/MS	By MS/MS	4.5	11.5	134660000	27773000	106880000	4343800	895890	3447900	33776000	65401000	1	5	6				154	326;787;1832;2431;3109	True;True;True;True;True	355;843;1949;2587;3341	888;889;2081;4835;4836;6622;6623;8610;8611	761;1804;4271;5887;7671;7672
P27048;P63163	P27048;P63163	4;4	4;4	4;4	Small nuclear ribonucleoprotein-associated protein B;Small nuclear ribonucleoprotein-associated protein N	Snrpb;Snrpn	sp|P27048|RSMB_MOUSE Small nuclear ribonucleoprotein-associated protein B OS=Mus musculus OX=10090 GN=Snrpb PE=1 SV=1;sp|P63163|RSMN_MOUSE Small nuclear ribonucleoprotein-associated protein N OS=Mus musculus OX=10090 GN=Snrpn PE=1 SV=1	2	4	4	4	2	4	2	4	2	4	16.5	16.5	16.5	23.656	231	231;240	0	23.718	By MS/MS	By MS/MS	6.5	16.5	222090000	63469000	158620000	14806000	4231200	10575000	67302000	102140000	2	3	5				158	1346;1820;2920;4354	True;True;True;True	1437;1937;3120;4653	3513;4812;4813;8023;12012;12013	3075;4254;4255;7160;10661;10662
P27659;P17094;P22738	P27659	37;4;4	37;4;4	37;4;4	60S ribosomal protein L3	Rpl3	sp|P27659|RL3_MOUSE 60S ribosomal protein L3 OS=Mus musculus OX=10090 GN=Rpl3 PE=1 SV=3	3	37	37	37	35	30	35	30	35	30	63.8	63.8	63.8	46.109	403	403;389;390	0	323.31	By MS/MS	By MS/MS	57.1	61.3	116550000000	66060000000	50491000000	6134300000	3476800000	2657400000	64865000000	31389000000	79	64	143				159	134;169;186;187;252;536;1010;1066;1150;1656;1844;1845;1862;2077;2080;2081;2255;2256;2271;2303;2422;2519;3080;3081;3193;3269;3270;3347;3513;3566;3633;3634;4087;4088;4089;4126;4134	True;True;True;True;True;True;True;True;True;True;True;True;True;True;True;True;True;True;True;True;True;True;True;True;True;True;True;True;True;True;True;True;True;True;True;True;True	144;145;182;183;200;201;202;275;576;1078;1079;1135;1223;1759;1961;1962;1979;1980;2209;2212;2213;2214;2401;2402;2417;2450;2577;2578;2681;3307;3308;3430;3510;3511;3591;3773;3833;3834;3902;3903;4373;4374;4375;4416;4424	362;363;364;446;447;448;449;492;493;494;495;496;497;498;499;500;501;703;704;1386;1387;1388;1389;1390;1391;1392;1393;1394;1395;1396;1397;2641;2642;2643;2644;2645;2646;2647;2648;2649;2650;2651;2652;2653;2654;2655;2656;2657;2658;2763;2966;2967;2968;2969;4268;4269;4866;4867;4868;4869;4870;4917;4918;4919;4920;5563;5564;5571;5572;5573;5574;5575;5576;5577;5578;5579;6146;6147;6148;6191;6192;6193;6194;627…	314;315;388;389;390;391;392;431;432;433;434;435;436;437;438;439;619;1203;1204;1205;1206;1207;1208;1209;1210;1211;1212;1213;1214;2296;2297;2298;2299;2300;2301;2302;2303;2304;2305;2306;2307;2308;2309;2310;2311;2312;2313;2401;2602;2603;3734;3735;3736;3737;4297;4298;4299;4300;4338;4339;4340;4341;4342;4937;4938;4947;4948;4949;4950;4951;4952;4953;4954;5464;5465;5466;5503;5504;5505;5506;5575;5576;5852;5…
P27773	P27773	7	7	7	Protein disulfide-isomerase A3	Pdia3	sp|P27773|PDIA3_MOUSE Protein disulfide-isomerase A3 OS=Mus musculus OX=10090 GN=Pdia3 PE=1 SV=2	1	7	7	7	6	7	6	7	6	7	18.6	18.6	18.6	56.678	505	505	0	56.843	By MS/MS	By MS/MS	16.4	18.6	267410000	54614000	212790000	8626000	1761700	6864200	68225000	128550000	1	6	7				160	255;1083;1155;2339;2652;3891;4666	True;True;True;True;True;True;True	278;1152;1229;2489;2821;4169;4983	708;709;2806;2979;2980;6372;6373;7215;7216;10759;10760;12765;12766	622;2438;2612;5659;6475;9507;11312;11313
P28474	P28474	2	2	2	Alcohol dehydrogenase class-3	Adh5	sp|P28474|ADHX_MOUSE Alcohol dehydrogenase class-3 OS=Mus musculus OX=10090 GN=Adh5 PE=1 SV=3	1	2	2	2	0	2	0	2	0	2	16.3	16.3	16.3	39.547	374	374	0	15.582		By MS/MS	0	16.3	27697000	0	27697000	1457700	0	1457700	0	18503000	0	2	2				161	152;1913	True;True	163;2034	402;5084	348;4494
P28656	P28656	3	3	3	Nucleosome assembly protein 1-like 1	Nap1l1	sp|P28656|NP1L1_MOUSE Nucleosome assembly protein 1-like 1 OS=Mus musculus OX=10090 GN=Nap1l1 PE=1 SV=2	1	3	3	3	3	3	3	3	3	3	11.8	11.8	11.8	45.345	391	391	0	19.114	By MS/MS	By MS/MS	11.8	11.8	50530000	21361000	29169000	3609300	1525800	2083500	20711000	20137000	1	2	3				162	1429;2381;3138	True;True;True	1523;2534;3372	3707;3708;6499;6500;8673;8674	3237;5772;5773;7723
P29341;Q9FXA2;Q05196	P29341	37;3;1	37;3;1	36;2;0	Polyadenylate-binding protein 1	Pabpc1	sp|P29341|PABP1_MOUSE Polyadenylate-binding protein 1 OS=Mus musculus OX=10090 GN=Pabpc1 PE=1 SV=2	3	37	37	36	35	36	35	36	34	35	63.7	63.7	63.7	70.67	636	636;671;682	0	323.31	By MS/MS	By MS/MS	54.4	63.2	62587000000	33656000000	28931000000	1738500000	934890000	803630000	32122000000	19745000000	65	59	124				163	225;246;305;454;455;848;1237;1358;1362;1363;1619;2026;2032;2040;2111;2254;2445;2924;2925;2926;2992;2993;3044;3045;3106;3165;3184;3202;3432;3540;3589;3590;3599;3622;4144;4174;4729	True;True;True;True;True;True;True;True;True;True;True;True;True;True;True;True;True;True;True;True;True;True;True;True;True;True;True;True;True;True;True;True;True;True;True;True;True	245;268;269;331;491;492;909;1324;1450;1454;1455;1721;2155;2156;2157;2163;2171;2247;2400;2602;2603;3128;3129;3130;3131;3212;3213;3214;3215;3269;3270;3336;3337;3401;3420;3440;3441;3684;3805;3857;3858;3868;3891;4435;4465;5053	620;621;622;623;689;690;691;827;828;829;830;831;832;833;1193;1194;1195;2233;2234;3224;3225;3534;3535;3541;3542;3543;3544;3545;3546;4179;4180;4181;4182;5419;5420;5421;5422;5423;5424;5439;5457;5458;5459;5460;5461;5462;5661;5662;5663;5664;6142;6143;6144;6145;6648;6649;6650;6651;6652;6653;6654;6655;8050;8051;8052;8053;8054;8055;8056;8057;8251;8252;8253;8254;8255;8256;8257;8258;8259;8260;8261;8262;826…	549;550;551;552;607;608;609;714;715;716;717;718;1031;1032;1033;1944;1945;2827;3093;3097;3098;3099;3100;3101;3652;3653;3654;3655;4802;4803;4804;4805;4806;4807;4820;4838;4839;4840;4841;4842;4843;4844;5032;5033;5034;5035;5461;5462;5463;5907;5908;5909;5910;5911;5912;5913;5914;5915;5916;5917;5918;5919;7180;7181;7182;7183;7184;7185;7186;7352;7353;7354;7355;7356;7357;7358;7359;7360;7361;7362;7363;7364;7…
P29391;P49945	P29391;P49945	5;3	5;3	5;3	Ferritin light chain 1;Ferritin light chain 2	Ftl1;Ftl2	sp|P29391|FRIL1_MOUSE Ferritin light chain 1 OS=Mus musculus OX=10090 GN=Ftl1 PE=1 SV=2;sp|P49945|FRIL2_MOUSE Ferritin light chain 2 OS=Mus musculus OX=10090 GN=Ftl2 PE=3 SV=2	2	5	5	5	5	5	5	5	5	5	41.5	41.5	41.5	20.802	183	183;183	0	59.936	By MS/MS	By MS/MS	41.5	41.5	679320000	238230000	441080000	56610000	19853000	36757000	224640000	308260000	6	8	14				164	260;2583;3058;3294;4136	True;True;True;True;True	283;2747;3283;3536;4426	721;722;723;724;7024;7025;8474;8475;8476;8477;9077;9078;11424;11425;11426;11427	632;633;634;6261;6262;7558;7559;7560;8077;8078;10125;10126;10127;10128
P29758	P29758	4	4	4	Ornithine aminotransferase, mitochondrial	Oat	sp|P29758|OAT_MOUSE Ornithine aminotransferase, mitochondrial OS=Mus musculus OX=10090 GN=Oat PE=1 SV=1	1	4	4	4	4	4	4	4	4	4	12.1	12.1	12.1	48.354	439	439	0	40.8	By MS/MS	By MS/MS	12.1	12.1	98505000	43717000	54788000	4690700	2081800	2609000	44711000	35607000	3	3	6				165	1475;1751;2046;2341	True;True;True;True	1569;1867;2177;2491	3837;3838;4619;4620;5486;5487;6378;6379	3365;3366;4066;4067;4869;5664
P30681	P30681	5	4	4	High mobility group protein B2	Hmgb2	sp|P30681|HMGB2_MOUSE High mobility group protein B2 OS=Mus musculus OX=10090 GN=Hmgb2 PE=1 SV=3	1	5	4	4	2	5	1	4	1	4	31	25.2	25.2	24.162	210	210	0	50.499	By matching	By MS/MS	13.3	31	247420000	4547700	242870000	41236000	757960	40478000	0	162250000	0	4	4				166	1910;2154;2943;3423;3588	True;True;False;True;True	2031;2293;3156;3157;3674;3856	5078;5079;5782;8112;8113;8114;9472;9473;9935	4490;4491;5145;7235;7236;8395;8795
P32067	P32067	11	11	11	Lupus La protein homolog	Ssb	sp|P32067|LA_MOUSE Lupus La protein homolog OS=Mus musculus OX=10090 GN=Ssb PE=1 SV=1	1	11	11	11	7	11	7	11	7	11	29.2	29.2	29.2	47.756	415	415	0	87.671	By MS/MS	By MS/MS	22.7	29.2	486480000	122590000	363890000	22113000	5572300	16540000	142170000	223520000	6	12	18				167	716;818;1231;1561;1772;2022;2168;2377;3693;4346;4683	True;True;True;True;True;True;True;True;True;True;True	770;876;1318;1661;1888;2151;2308;2530;3964;4645;5000	1898;2166;2167;2168;3215;4046;4047;4048;4676;4677;5411;5837;5838;6490;6491;10215;10216;10217;11992;11993;12799;12800;12801;12802	1650;1885;1886;2819;3538;3539;3540;4128;4129;4797;5198;5766;9042;9043;9044;10640;11345;11346;11347;11348
P34022	P34022	2	2	2	Ran-specific GTPase-activating protein	Ranbp1	sp|P34022|RANG_MOUSE Ran-specific GTPase-activating protein OS=Mus musculus OX=10090 GN=Ranbp1 PE=1 SV=2	1	2	2	2	1	2	1	2	1	2	10.8	10.8	10.8	23.596	203	203	0	11.249	By matching	By MS/MS	5.4	10.8	35757000	3427600	32330000	4469700	428450	4041200	0	21598000	0	1	1				168	1089;3966	True;True	1158;4246	2818;10948;10949	2450;9691
P34884	P34884	2	2	2	Macrophage migration inhibitory factor	Mif	sp|P34884|MIF_MOUSE Macrophage migration inhibitory factor OS=Mus musculus OX=10090 GN=Mif PE=1 SV=2	1	2	2	2	0	2	0	2	0	2	26.1	26.1	26.1	12.504	115	115	0	12.744		By MS/MS	0	26.1	3726500	0	3726500	621080	0	621080	0	2489500	0	2	2				169	398;2571	True;True	432;2734	1063;6992	921;6231
P35278;Q9SN68;P31582;P61021	P35278	5;1;1;1	5;1;1;1	4;0;0;0	Ras-related protein Rab-5C	Rab5c	sp|P35278|RAB5C_MOUSE Ras-related protein Rab-5C OS=Mus musculus OX=10090 GN=Rab5c PE=1 SV=2	4	5	5	4	2	5	2	5	2	4	31.9	31.9	27.3	23.412	216	216;200;200;215	0	39.807	By matching	By MS/MS	15.3	31.9	88988000	12766000	76222000	8089800	1160500	6929300	16755000	46931000	0	5	5				170	1311;1592;3206;3829;4670	True;True;True;True;True	1402;1693;3445;4102;4987	3423;3424;3425;3426;4126;8852;8853;10570;12772	3000;3001;3608;7882;9340;11318
P61294;P35279;Q9LV79;Q9SID8;Q9LFT9;O80501;Q9SMR4;Q8BHD0	P61294;P35279	3;3;1;1;1;1;1;1	3;3;1;1;1;1;1;1	3;3;1;1;1;1;1;1	Ras-related protein Rab-6B;Ras-related protein Rab-6A	Rab6b;Rab6a	sp|P61294|RAB6B_MOUSE Ras-related protein Rab-6B OS=Mus musculus OX=10090 GN=Rab6b PE=1 SV=1;sp|P35279|RAB6A_MOUSE Ras-related protein Rab-6A OS=Mus musculus OX=10090 GN=Rab6a PE=1 SV=4	8	3	3	3	1	3	1	3	1	3	16.8	16.8	16.8	23.461	208	208;208;206;207;207;208;214;217	0	33.185	By matching	By MS/MS	5.3	16.8	154770000	17350000	137420000	11905000	1334600	10570000	0	91801000	0	3	3				171	1557;2707;3458	True;True;True	1657;2884;3711	4041;7365;7366;9583	3534;6602;8498
P35293;O23657	P35293;O23657	2;1	2;1	2;1	Ras-related protein Rab-18;Ras-related protein RABC1	Rab18;RABC1	sp|P35293|RAB18_MOUSE Ras-related protein Rab-18 OS=Mus musculus OX=10090 GN=Rab18 PE=1 SV=2;sp|O23657|RABC1_ARATH Ras-related protein RABC1 OS=Arabidopsis thaliana OX=3702 GN=RABC1 PE=1 SV=1	2	2	2	2	0	2	0	2	0	2	12.6	12.6	12.6	23.035	206	206;212	0	12.918		By MS/MS	0	12.6	28420000	0	28420000	2186200	0	2186200	0	18986000	0	2	2				172	1889;2329	True;True	2008;2477	5001;6342	4413;5640
P35550	P35550	5	5	3	rRNA 2-O-methyltransferase fibrillarin	Fbl	sp|P35550|FBRL_MOUSE rRNA 2-O-methyltransferase fibrillarin OS=Mus musculus OX=10090 GN=Fbl PE=1 SV=2	1	5	5	3	4	5	4	5	2	3	27.2	27.2	19.6	34.306	327	327	0	32.145	By MS/MS	By MS/MS	17.1	27.2	484250000	151330000	332930000	24213000	7566300	16646000	143120000	230620000	3	6	9				173	590;2039;2309;3070;4399	True;True;True;True;True	634;2170;2456;3295;4701	1544;1545;5453;5454;5455;5456;6295;6296;6297;6298;8497;8498;12128	1340;4834;4835;4836;4837;5601;5602;5603;5604;7577;7578;10759
P35564;P35565;P27824	P35564;P35565	3;2;1	3;2;1	3;2;1	Calnexin	Canx	sp|P35564|CALX_MOUSE Calnexin OS=Mus musculus OX=10090 GN=Canx PE=1 SV=1;sp|P35565|CALX_RAT Calnexin OS=Rattus norvegicus OX=10116 GN=Canx PE=1 SV=1	3	3	3	3	3	3	3	3	3	3	6.9	6.9	6.9	67.277	591	591;591;592	0	20.643	By MS/MS	By MS/MS	6.9	6.9	194170000	47523000	146650000	6067900	1485100	4582900	49561000	95934000	2	4	6				174	342;1564;2164	True;True;True	371;1664;2304	931;932;4055;4056;5822;5823;5824	803;804;3547;5183;5184;5185
P35700;O08807	P35700	5;1	5;1	5;1	Peroxiredoxin-1	Prdx1	sp|P35700|PRDX1_MOUSE Peroxiredoxin-1 OS=Mus musculus OX=10090 GN=Prdx1 PE=1 SV=1	2	5	5	5	2	5	2	5	2	5	31.7	31.7	31.7	22.176	199	199;274	0	39.072	By matching	By MS/MS	9	31.7	285500000	27676000	257820000	19033000	1845000	17188000	51725000	148190000	0	4	4				175	403;1464;2644;2834;3924	True;True;True;True;True	437;1558;2813;3015;4202	1071;3816;3817;7199;7761;10840;10841	928;3350;6461;6934;9592
P35922;Q9WVR4	P35922;Q9WVR4	2;1	2;1	2;1	Fragile X mental retardation protein 1 homolog;Fragile X mental retardation syndrome-related protein 2	Fmr1;Fxr2	sp|P35922|FMR1_MOUSE Synaptic functional regulator FMR1 OS=Mus musculus OX=10090 GN=Fmr1 PE=1 SV=1;sp|Q9WVR4|FXR2_MOUSE Fragile X mental retardation syndrome-related protein 2 OS=Mus musculus OX=10090 GN=Fxr2 PE=1 SV=1	2	2	2	2	0	2	0	2	0	2	5.2	5.2	5.2	68.988	614	614;673	0	16.121		By MS/MS	0	5.2	14496000	0	14496000	467620	0	467620	0	9684300	0	1	1				176	603;819	True;True	647;877	1577;2169	1368;1887
P35979	P35979	8	8	8	60S ribosomal protein L12	Rpl12	sp|P35979|RL12_MOUSE 60S ribosomal protein L12 OS=Mus musculus OX=10090 GN=Rpl12 PE=1 SV=2	1	8	8	8	8	8	8	8	8	8	58.8	58.8	58.8	17.804	165	165	0	278.34	By MS/MS	By MS/MS	58.8	58.8	88207000000	30200000000	58008000000	9800800000	3355500000	6445300000	30441000000	37188000000	24	31	55				177	509;887;888;963;1705;1722;1843;3205	True;True;True;True;True;True;True;True	549;950;951;1027;1816;1835;1960;3444	1327;1328;1329;1330;1331;1332;2326;2327;2328;2329;2330;2331;2332;2333;2334;2335;2336;2337;2338;2339;2340;2341;2342;2343;2344;2345;2535;2536;4464;4465;4466;4467;4468;4469;4470;4471;4472;4473;4474;4527;4528;4529;4530;4531;4532;4533;4534;4535;4536;4862;4863;4864;4865;8848;8849;8850;8851	1151;1152;1153;1154;1155;2025;2026;2027;2028;2029;2030;2031;2032;2033;2034;2035;2036;2037;2038;2039;2040;2041;2042;2208;2209;3930;3931;3932;3933;3934;3935;3936;3937;3938;3939;3940;3985;3986;3987;3988;3989;3990;3991;3992;3993;3994;3995;3996;3997;4292;4293;4294;4295;4296;7876;7877;7878;7879;7880;7881
P35980	P35980	17	17	17	60S ribosomal protein L18	Rpl18	sp|P35980|RL18_MOUSE 60S ribosomal protein L18 OS=Mus musculus OX=10090 GN=Rpl18 PE=1 SV=3	1	17	17	17	17	15	17	15	17	15	53.7	53.7	53.7	21.644	188	188	0	182.05	By MS/MS	By MS/MS	53.7	50	135830000000	63466000000	72365000000	19404000000	9066500000	10338000000	64967000000	46102000000	55	40	95				178	159;329;981;1548;1585;1586;1951;1952;2911;3439;3440;3699;3838;3839;4013;4014;4015	True;True;True;True;True;True;True;True;True;True;True;True;True;True;True;True;True	170;358;1046;1648;1685;1686;2073;2074;3108;3109;3691;3692;3970;4111;4112;4294;4295;4296	415;416;894;895;896;897;898;899;2575;2576;4024;4025;4026;4027;4106;4107;4108;5180;5181;5182;5183;5184;5185;5186;5187;5188;5189;5190;5191;5192;5193;5194;5195;5196;5197;5198;5199;5200;5201;5202;5203;5204;5205;5206;5207;5208;5209;5210;5211;5212;5213;5214;5215;5216;5217;5218;5219;7992;7993;7994;7995;7996;7997;7998;7999;9525;9526;9527;9528;9529;9530;9531;9532;10233;10234;10235;10583;10584;10585;10586;…	360;765;766;767;768;769;770;2239;3519;3520;3521;3522;3590;3591;3592;3593;3594;4573;4574;4575;4576;4577;4578;4579;4580;4581;4582;4583;4584;4585;4586;4587;4588;4589;4590;4591;4592;4593;4594;4595;4596;4597;4598;4599;4600;4601;4602;4603;4604;4605;4606;4607;4608;4609;4610;4611;4612;4613;4614;4615;4616;4617;4618;4619;4620;4621;4622;7135;7136;7137;7138;7139;7140;8441;8442;8443;8444;8445;8446;8447;9060;9…
P35991	P35991	2	2	2	Tyrosine-protein kinase BTK	Btk	sp|P35991|BTK_MOUSE Tyrosine-protein kinase BTK OS=Mus musculus OX=10090 GN=Btk PE=1 SV=4	1	2	2	2	1	2	1	2	1	2	1.8	1.8	1.8	76.437	659	659	0	12.477	By MS/MS	By MS/MS	1.8	1.8	4488000	1184100	3303900	112200	29602	82599	0	2207200	1	1	2				179	46;47	True;True	48;49	100;101;102	84;85
P36552	P36552	7	7	7	Oxygen-dependent coproporphyrinogen-III oxidase, mitochondrial	Cpox	sp|P36552|HEM6_MOUSE Oxygen-dependent coproporphyrinogen-III oxidase, mitochondrial OS=Mus musculus OX=10090 GN=Cpox PE=1 SV=2	1	7	7	7	1	7	1	7	1	7	22.1	22.1	22.1	49.714	443	443	0	49.645	By matching	By MS/MS	3.4	22.1	79119000	1691500	77428000	3296600	70480	3226200	0	51726000	0	6	6				180	242;771;778;1420;1807;3840;4768	True;True;True;True;True;True;True	264;826;833;1514;1924;4113;5093	680;2047;2058;3692;4784;10592;10593;13014	599;1777;1786;3226;4229;9364;11537
P38647	P38647	9	9	9	Stress-70 protein, mitochondrial	Hspa9	sp|P38647|GRP75_MOUSE Stress-70 protein, mitochondrial OS=Mus musculus OX=10090 GN=Hspa9 PE=1 SV=3	1	9	9	9	5	9	5	9	5	9	18.3	18.3	18.3	73.46	679	679	0	69.839	By MS/MS	By MS/MS	9.7	18.3	247210000	92069000	155140000	6505600	2422900	4082800	101620000	94095000	5	4	9				181	349;523;1006;2428;2598;2874;4075;4294;4448	True;True;True;True;True;True;True;True;True	380;563;1074;2584;2762;3058;4361;4590;4753	948;949;1354;1355;2630;6618;7082;7861;11266;11267;11852;11853;12255;12256	820;1176;2286;5883;6358;7020;9982;9983;10505;10506;10875;10876
P40142	P40142	14	14	14	Transketolase	Tkt	sp|P40142|TKT_MOUSE Transketolase OS=Mus musculus OX=10090 GN=Tkt PE=1 SV=1	1	14	14	14	7	14	7	14	7	14	31.5	31.5	31.5	67.63	623	623	0	105.66	By MS/MS	By MS/MS	18	31.5	616980000	155950000	461020000	23730000	5998200	17732000	191330000	272610000	2	16	18				182	1435;1717;1864;1914;2364;2390;2483;2894;3073;3582;3794;4101;4337;4338	True;True;True;True;True;True;True;True;True;True;True;True;True;True	1529;1830;1982;2035;2516;2544;2643;3084;3298;3850;4066;4389;4636;4637	3722;3723;4513;4514;4922;4923;5085;5086;5087;5088;6460;6521;6740;6741;7936;8502;9912;9913;9914;9915;10494;11342;11974;11975;11976	3248;3976;4344;4495;4496;4497;4498;5739;5790;5990;7085;7582;8779;8780;9280;10054;10626;10627
Q9Z0N1;P81795;P41091;C9WPN6;Q9Z0N2;Q2VIR3	Q9Z0N1;P81795;P41091;C9WPN6;Q9Z0N2;Q2VIR3	2;2;2;1;1;1	2;2;2;1;1;1	2;2;2;1;1;1	Eukaryotic translation initiation factor 2 subunit 3, X-linked;Eukaryotic translation initiation factor 2 subunit 3;Eukaryotic translation initiation factor 2 subunit 3, Y-linked;Putative eukaryotic translation initiation factor 2 subunit 3-like protein	Eif2s3x;Eif2s3;EIF2S3;Eif2s3y;EIF2S3L	sp|Q9Z0N1|IF2G_MOUSE Eukaryotic translation initiation factor 2 subunit 3, X-linked OS=Mus musculus OX=10090 GN=Eif2s3x PE=1 SV=2;sp|P81795|IF2G_RAT Eukaryotic translation initiation factor 2 subunit 3, X-linked OS=Rattus norvegicus OX=10116 GN=Eif2s3 PE=1	6	2	2	2	2	2	2	2	2	2	9.1	9.1	9.1	51.065	472	472;472;472;472;472;472	0	14.904	By MS/MS	By MS/MS	9.1	9.1	19215000	1922300	17293000	914990	91538	823460	0	11552000	1	2	3				183	2053;3475	True;True	2185;3729	5507;5508;9629;9630	4886;8543;8544
P41105	P41105	15	15	15	60S ribosomal protein L28	Rpl28	sp|P41105|RL28_MOUSE 60S ribosomal protein L28 OS=Mus musculus OX=10090 GN=Rpl28 PE=1 SV=2	1	15	15	15	14	14	14	14	14	14	54	54	54	15.733	137	137	0	132.24	By MS/MS	By MS/MS	53.3	54	44787000000	21127000000	23659000000	5598300000	2640900000	2957400000	19774000000	16004000000	22	22	44				184	414;1607;1608;2268;2269;2974;2975;3036;3041;3324;3459;4091;4092;4712;4713	True;True;True;True;True;True;True;True;True;True;True;True;True;True;True	448;1708;1709;1710;2414;2415;3194;3195;3261;3266;3567;3712;3713;4377;4378;4379;5035;5036	1090;1091;1092;1093;4152;4153;4154;4155;4156;6184;6185;6186;6187;6188;6189;8208;8209;8210;8211;8212;8414;8415;8428;8429;8430;9151;9152;9584;9585;9586;9587;9588;9589;9590;9591;9592;9593;9594;9595;9596;9597;11310;11311;11312;11313;11314;11315;11316;11317;11318;11319;11320;11321;12886;12887;12888;12889	944;945;946;3633;3634;3635;3636;5498;5499;5500;5501;7316;7317;7318;7319;7507;7508;7518;7519;8138;8139;8499;8500;8501;8502;8503;8504;8505;8506;8507;8508;8509;8510;8511;8512;8513;8514;8515;10026;10027;10028;10029;10030;10031;10032;10033;10034;10035;11422;11423;11424
P42669	P42669	5	5	5	Transcriptional activator protein Pur-alpha	Pura	sp|P42669|PURA_MOUSE Transcriptional activator protein Pur-alpha OS=Mus musculus OX=10090 GN=Pura PE=1 SV=1	1	5	5	5	4	5	4	5	4	5	29.3	29.3	29.3	34.883	321	321	0	90.605	By MS/MS	By MS/MS	20.2	29.3	316610000	138380000	178230000	39576000	17297000	22278000	161850000	95598000	3	5	8				185	759;1127;1138;1523;2509	True;True;True;True;True	813;1197;1208;1622;2670	2004;2905;2906;2937;2938;3956;3957;6806;6807	1735;2546;2547;2578;3468;3469;6047;6048
P42932	P42932	3	3	3	T-complex protein 1 subunit theta	Cct8	sp|P42932|TCPQ_MOUSE T-complex protein 1 subunit theta OS=Mus musculus OX=10090 GN=Cct8 PE=1 SV=3	1	3	3	3	3	3	3	3	3	3	6.6	6.6	6.6	59.555	548	548	0	18.046	By matching	By MS/MS	6.6	6.6	120320000	71876000	48443000	3342200	1996600	1345700	72061000	32178000	0	2	2				186	722;2452;2831	True;True;True	776;2610;3012	1907;1908;6668;6669;7753;7754	1656;5930;6929
P43274	P43274	6	2	2	Histone H1.4	Hist1h1e	sp|P43274|H14_MOUSE Histone H1.4 OS=Mus musculus OX=10090 GN=Hist1h1e PE=1 SV=2	1	6	2	2	5	6	2	2	2	2	17.4	5.9	5.9	21.977	219	219	0	14.653	By MS/MS	By MS/MS	16.9	17.4	635550000	267550000	368000000	70616000	29727000	40889000	266590000	246800000	2	3	5				187	234;235;2084;2265;3541;4053	False;False;False;True;False;True	256;257;2217;2411;3806;4335	651;652;653;654;655;656;5585;6171;6172;6173;6174;9815;9816;11179;11180	576;577;578;579;580;581;4962;5488;5489;5490;8699;8700;9900;9901
P43275	P43275	7	6	6	Histone H1.1	Hist1h1a	sp|P43275|H11_MOUSE Histone H1.1 OS=Mus musculus OX=10090 GN=Hist1h1a PE=1 SV=2	1	7	6	6	7	7	6	6	6	6	31	26.8	26.8	21.785	213	213	0	113.05	By MS/MS	By MS/MS	31	31	2907900000	1165100000	1742700000	415410000	166440000	248960000	1219900000	1109500000	10	10	20				188	2174;2219;3506;3507;3541;3600;3601	True;True;True;True;False;True;True	2314;2362;3766;3767;3806;3869;3870	5853;5854;5855;5856;5857;5858;6000;6001;6002;6003;9717;9718;9719;9720;9721;9722;9815;9816;9988;9989;9990;9991;9992;9993	5209;5210;5211;5212;5213;5214;5332;5333;5334;8615;8616;8617;8618;8619;8699;8700;8843;8844;8845;8846;8847;8848
P54775;P43686	P54775;P43686	2;2	2;2	2;2	26S protease regulatory subunit 6B	Psmc4;PSMC4	sp|P54775|PRS6B_MOUSE 26S proteasome regulatory subunit 6B OS=Mus musculus OX=10090 GN=Psmc4 PE=1 SV=2;sp|P43686|PRS6B_HUMAN 26S proteasome regulatory	3	2	2	2	2	2	2	2	2	2	7.9	7.9	7.9	47.408	418	418;418;418	0	11.014	By matching	By MS/MS	7.9	7.9	21649000	9488500	12161000	865970	379540	486430	8244300	9368300	0	2	2				189	799;978	True;True	856;1043	2106;2107;2571;2572	1827;2236
P46638;P62492;Q9SN35;Q9FK68;Q39222;Q9LK99;Q9FJH0;O04486	P46638;P62492	4;3;1;1;1;1;1;1	4;3;1;1;1;1;1;1	4;3;1;1;1;1;1;1	Ras-related protein Rab-11B;Ras-related protein Rab-11A	Rab11b;Rab11a	sp|P46638|RB11B_MOUSE Ras-related protein Rab-11B OS=Mus musculus OX=10090 GN=Rab11b PE=1 SV=3;sp|P62492|RB11A_MOUSE Ras-related protein Rab-11A OS=Mus musculus OX=10090 GN=Rab11a PE=1 SV=3	8	4	4	4	1	4	1	4	1	4	18.8	18.8	18.8	24.489	218	218;216;214;216;216;217;217;217	0	24.542	By matching	By MS/MS	5	18.8	134140000	10340000	123800000	8942800	689310	8253500	0	82707000	0	4	4				190	1317;1687;3017;4529	True;True;True;True	1408;1794;3241;4839	3452;4384;8356;12445;12446	3024;3852;7456;11029
P46978;P46977	P46978;P46977	2;2	2;2	2;2	Dolichyl-diphosphooligosaccharide--protein glycosyltransferase subunit STT3A	Stt3a;STT3A	sp|P46978|STT3A_MOUSE Dolichyl-diphosphooligosaccharide--protein glycosyltransferase subunit STT3A OS=Mus musculus OX=10090 GN=Stt3a PE=1 SV=1;sp|P46977|STT3A_HUMAN Dolichyl-diphosphooligosaccharide--protein glycosyltransferase subunit STT3A OS=Homo sapien	2	2	2	2	1	2	1	2	1	2	2.6	2.6	2.6	80.597	705	705;705	0	11.546	By matching	By MS/MS	1.6	2.6	28813000	3445800	25368000	993570	118820	874750	0	16947000	0	1	1				191	1288;1874	True;True	1377;1992	3369;3370;4954	2959;4371
P47738	P47738	5	5	5	Aldehyde dehydrogenase, mitochondrial	Aldh2	sp|P47738|ALDH2_MOUSE Aldehyde dehydrogenase, mitochondrial OS=Mus musculus OX=10090 GN=Aldh2 PE=1 SV=1	1	5	5	5	5	5	5	5	5	5	12.1	12.1	12.1	56.537	519	519	0	34.039	By MS/MS	By MS/MS	12.1	12.1	166310000	32787000	133530000	6929800	1366100	5563700	39281000	82710000	1	6	7				192	3892;3940;4132;4526;4653	True;True;True;True;True	4170;4219;4422;4836;4970	10761;10762;10888;10889;11415;11416;11417;12437;12438;12740;12741	9508;9636;9637;10120;10121;11023;11294
P47753	P47753	5	5	4	F-actin-capping protein subunit alpha-1	Capza1	sp|P47753|CAZA1_MOUSE F-actin-capping protein subunit alpha-1 OS=Mus musculus OX=10090 GN=Capza1 PE=1 SV=4	1	5	5	4	5	5	5	5	4	4	27.3	27.3	23.8	32.939	286	286	0	42.895	By MS/MS	By MS/MS	27.3	27.3	302760000	220940000	81821000	23289000	16995000	6293900	214240000	61361000	4	3	7				193	795;1156;1252;2610;3927	True;True;True;True;True	852;1230;1339;2774;4206	2100;2101;2981;2982;3256;3257;7106;7107;10854;10855	1822;1823;2613;2614;2852;2853;6378;9606
P47754;Q2QL88	P47754;Q2QL88	3;2	2;1	2;1	F-actin-capping protein subunit alpha-2	Capza2	sp|P47754|CAZA2_MOUSE F-actin-capping protein subunit alpha-2 OS=Mus musculus OX=10090 GN=Capza2 PE=1 SV=3;sp|Q2QL88|CAZA2_MICMU F-actin-capping protein subunit alpha-2 OS=Microcebus murinus OX=30608 GN=CAPZA2 PE=3 SV=3	2	3	2	2	3	2	2	1	2	1	13.6	10.1	10.1	32.967	286	286;286	0	18.848	By MS/MS	By matching	13.6	8.7	50234000	43839000	6395200	3864200	3372200	491940	43839000	0	2	0	2				194	81;1259;2610	True;True;False	84;1347;2774	194;3284;3285;7106;7107	168;2881;6378
P47757	P47757	3	3	3	F-actin-capping protein subunit beta	Capzb	sp|P47757|CAPZB_MOUSE F-actin-capping protein subunit beta OS=Mus musculus OX=10090 GN=Capzb PE=1 SV=3	1	3	3	3	3	3	3	3	3	3	13.4	13.4	13.4	31.345	277	277	0	29.211	By MS/MS	By MS/MS	13.4	13.4	142730000	102810000	39924000	8395900	6047400	2348500	103780000	25693000	2	0	2				195	1326;3488;3765	True;True;True	1417;3746;4037	3469;3470;9668;9669;10422;10423	3040;8577;8578;9224
P47911	P47911	23	23	23	60S ribosomal protein L6	Rpl6	sp|P47911|RL6_MOUSE 60S ribosomal protein L6 OS=Mus musculus OX=10090 GN=Rpl6 PE=1 SV=3	1	23	23	23	23	22	23	22	23	22	46.6	46.6	46.6	33.509	296	296	0	323.31	By MS/MS	By MS/MS	46.6	45.9	124980000000	74741000000	50239000000	8927200000	5338700000	3588500000	76778000000	31113000000	51	44	95				196	437;456;909;910;1272;1273;1682;1683;1712;1713;1714;1905;3265;3702;3743;3744;3919;4180;4181;4327;4636;4777;4778	True;True;True;True;True;True;True;True;True;True;True;True;True;True;True;True;True;True;True;True;True;True;True	473;493;972;973;1361;1362;1789;1790;1824;1825;1826;2025;3506;3973;3974;4015;4016;4197;4473;4474;4625;4951;5102;5103	1152;1153;1196;1197;1198;1199;2387;2388;2389;2390;2391;2392;3324;3325;3326;3327;4366;4367;4368;4369;4370;4371;4372;4373;4374;4375;4489;4490;4491;4492;4493;4494;4495;4496;4497;4498;4499;4500;4501;4502;4503;4504;5056;5057;5058;5059;9000;9001;9002;9003;9004;9005;9006;10238;10239;10240;10241;10242;10243;10362;10363;10364;10365;10366;10367;10368;10369;10370;10371;10372;10373;10374;10375;10832;10833;11…	994;995;996;997;998;1034;1035;1036;1037;1038;1039;2076;2077;2078;2079;2080;2081;2917;2918;2919;3837;3838;3839;3840;3841;3842;3843;3844;3845;3846;3953;3954;3955;3956;3957;3958;3959;3960;3961;3962;3963;3964;3965;3966;3967;3968;3969;4475;4476;4477;8012;8013;8014;8015;8016;8017;8018;9065;9066;9067;9068;9069;9070;9166;9167;9168;9169;9170;9171;9172;9173;9174;9175;9176;9177;9178;9179;9180;9181;9182;9183…
P47915	P47915	5	5	5	60S ribosomal protein L29	Rpl29	sp|P47915|RL29_MOUSE 60S ribosomal protein L29 OS=Mus musculus OX=10090 GN=Rpl29 PE=1 SV=2	1	5	5	5	5	4	5	4	5	4	30	30	30	17.587	160	160	0	53.756	By MS/MS	By MS/MS	30	20.6	17330000000	8955000000	8374800000	3466000000	1791000000	1675000000	10236000000	4313900000	10	7	17				197	300;322;3394;3711;4639	True;True;True;True;True	326;350;3642;3983;4954	814;815;816;817;818;877;878;9380;9381;9382;9383;10262;10263;10264;10265;10266;10267;12713;12714	701;702;703;704;705;753;754;8321;8322;8323;8324;9086;9087;9088;9089;9090;11269;11270
P47955	P47955	7	7	7	60S acidic ribosomal protein P1	Rplp1	sp|P47955|RLA1_MOUSE 60S acidic ribosomal protein P1 OS=Mus musculus OX=10090 GN=Rplp1 PE=1 SV=1	1	7	7	7	6	6	6	6	6	6	99.1	99.1	99.1	11.475	114	114	0	219.59	By MS/MS	By MS/MS	99.1	95.6	6853100000	2318600000	4534500000	2284400000	772860000	1511500000	2341500000	2959200000	9	8	17				198	21;239;240;241;399;400;2109	True;True;True;True;True;True;True	21;261;262;263;433;434;2244;2245	37;38;39;665;666;667;668;669;670;671;672;673;674;675;676;677;678;679;1064;1065;1066;5653;5654;5655;5656	34;35;588;589;590;591;592;593;594;595;596;597;598;922;923;5024;5025;5026;5027
P47962	P47962	27	27	27	60S ribosomal protein L5	Rpl5	sp|P47962|RL5_MOUSE 60S ribosomal protein L5 OS=Mus musculus OX=10090 GN=Rpl5 PE=1 SV=3	1	27	27	27	26	24	26	24	26	24	67.7	67.7	67.7	34.4	297	297	0	323.31	By MS/MS	By MS/MS	55.9	63.3	88772000000	53331000000	35441000000	8070200000	4848300000	3221900000	50074000000	22155000000	72	47	119				199	181;599;843;844;1211;1212;1213;1314;1315;1667;1796;2065;2152;2823;3094;3095;3234;3365;3366;3405;4078;4079;4221;4250;4498;4698;4699	True;True;True;True;True;True;True;True;True;True;True;True;True;True;True;True;True;True;True;True;True;True;True;True;True;True;True	195;643;904;905;1296;1297;1298;1405;1406;1771;1772;1773;1912;1913;2197;2290;2291;3004;3321;3322;3323;3324;3325;3475;3612;3613;3653;4364;4365;4515;4544;4808;5017;5018;5019;5020	478;479;1564;1565;1566;1567;2223;2224;2225;2226;3161;3162;3163;3164;3165;3166;3167;3168;3169;3170;3171;3172;3435;3436;3437;3438;3439;3440;3441;3442;3443;3444;3445;3446;3447;3448;4315;4316;4317;4318;4319;4320;4321;4322;4323;4324;4325;4326;4327;4752;4753;4754;4755;4756;4757;4758;4759;4760;4761;4762;5537;5538;5775;5776;5777;5778;5779;5780;7734;7735;7736;8555;8556;8557;8558;8559;8560;8561;8562;8563;8…	419;420;1356;1357;1358;1359;1360;1361;1936;1937;1938;2769;2770;2771;2772;2773;2774;2775;2776;2777;3009;3010;3011;3012;3013;3014;3015;3016;3017;3018;3019;3020;3786;3787;3788;3789;3790;3791;3792;3793;3794;3795;3796;3797;4201;4202;4203;4204;4205;4206;4207;4208;4209;4210;4211;4212;4915;4916;5140;5141;5142;5143;6915;6916;7625;7626;7627;7628;7629;7630;7631;7632;7633;7634;7635;7636;7637;7638;7639;7640;7…
P47963	P47963	15	15	15	60S ribosomal protein L13	Rpl13	sp|P47963|RL13_MOUSE 60S ribosomal protein L13 OS=Mus musculus OX=10090 GN=Rpl13 PE=1 SV=3	1	15	15	15	15	13	15	13	15	13	54.5	54.5	54.5	24.305	211	211	0	264.48	By MS/MS	By MS/MS	54.5	51.2	114190000000	65263000000	48931000000	12688000000	7251400000	5436700000	61386000000	32329000000	38	36	74				200	1374;1759;2135;2362;3003;3037;3167;3596;3761;3931;3932;4192;4193;4305;4306	True;True;True;True;True;True;True;True;True;True;True;True;True;True;True	1466;1875;2271;2272;2512;2513;3225;3226;3262;3403;3864;4033;4210;4211;4485;4486;4601;4602	3569;3570;4650;4651;4652;4653;4654;4655;5721;5722;5723;5724;5725;5726;5727;5728;5729;5730;5731;6438;6439;6440;6441;6442;6443;6444;6445;6446;6447;6448;6449;6450;6451;6452;6453;6454;6455;8289;8290;8291;8292;8293;8294;8295;8296;8416;8417;8418;8419;8753;8754;8755;8756;8757;8758;8759;9966;9967;10409;10410;10411;10412;10413;10414;10415;10866;10867;10868;11588;11589;11590;11591;11592;11593;11594;11595;1…	3121;3122;4108;4109;4110;4111;4112;4113;4114;5085;5086;5087;5088;5089;5090;5091;5092;5093;5094;5095;5715;5716;5717;5718;5719;5720;5721;5722;5723;5724;5725;5726;5727;5728;5729;5730;5731;5732;5733;5734;5735;7393;7394;7395;7396;7397;7398;7509;7510;7511;7789;7790;7791;7792;7793;7794;7795;8824;9212;9213;9214;9215;9216;9217;9615;9616;9617;10275;10276;10277;10278;10279;10280;10281;10282;10283;10522;1052…
P47964	P47964	6	6	6	60S ribosomal protein L36	Rpl36	sp|P47964|RL36_MOUSE 60S ribosomal protein L36 OS=Mus musculus OX=10090 GN=Rpl36 PE=1 SV=2	1	6	6	6	6	5	6	5	6	5	31.4	31.4	31.4	12.215	105	105	0	60.66	By MS/MS	By MS/MS	31.4	27.6	22691000000	9904300000	12786000000	7563600000	3301400000	4262100000	13373000000	3726700000	13	9	22				201	286;669;1048;1049;3348;4720	True;True;True;True;True;True	309;310;311;312;719;1117;1118;3592;3593;5043;5044	773;774;775;776;777;778;779;780;781;782;1771;1772;2728;2729;2730;2731;9209;9210;9211;9212;12901;12902;12903;12904	669;670;671;672;673;674;675;1531;1532;2369;2370;2371;2372;2373;8187;8188;8189;11436;11437;11438;11439;11440;11441
P48036	P48036	7	7	7	Annexin A5	Anxa5	sp|P48036|ANXA5_MOUSE Annexin A5 OS=Mus musculus OX=10090 GN=Anxa5 PE=1 SV=1	1	7	7	7	5	7	5	7	5	7	20.4	20.4	20.4	35.752	319	319	0	59.267	By matching	By MS/MS	15.4	20.4	123380000	11694000	111690000	5364300	508450	4855900	17956000	68350000	0	7	7				202	661;662;1036;1157;1469;3498;3499	True;True;True;True;True;True;True	706;707;1105;1231;1563;3757;3758	1736;1737;1738;1739;2707;2983;2984;3825;3826;9702;9703;9704	1504;1505;2353;2615;3355;8603;8604
P48758	P48758	2	2	2	Carbonyl reductase [NADPH] 1	Cbr1	sp|P48758|CBR1_MOUSE Carbonyl reductase [NADPH] 1 OS=Mus musculus OX=10090 GN=Cbr1 PE=1 SV=3	1	2	2	2	1	2	1	2	1	2	9.4	9.4	9.4	30.641	277	277	0	14.701	By matching	By MS/MS	5.1	9.4	39230000	4788300	34442000	2307700	281660	2026000	0	23009000	0	2	2				203	1937;3750	True;True	2058;4022	5149;10387;10388	4545;9194
P48962;Q3V132;O49447;P31167;P40941	P48962	14;3;1;1;1	14;3;1;1;1	6;0;0;0;0	ADP/ATP translocase 1	Slc25a4	sp|P48962|ADT1_MOUSE ADP/ATP translocase 1 OS=Mus musculus OX=10090 GN=Slc25a4 PE=1 SV=4	5	14	14	6	13	12	13	12	6	5	51.3	51.3	20.8	32.904	298	298;320;379;381;385	0	89.825	By MS/MS	By MS/MS	42.3	47	2134600000	1049600000	1085000000	101650000	49981000	51666000	994250000	757420000	14	14	28				204	52;547;562;845;1319;1334;1424;1496;1507;2614;3246;4643;4647;4648	True;True;True;True;True;True;True;True;True;True;True;True;True;True	54;587;603;906;1410;1425;1518;1590;1591;1605;2778;3487;4958;4964;4965	112;1419;1420;1466;1467;2227;2228;3454;3455;3484;3485;3697;3698;3885;3886;3887;3888;3889;3890;3919;3920;3921;3922;7114;7115;7116;7117;8951;8952;12721;12729;12730;12731	95;1232;1233;1273;1274;1939;1940;3026;3027;3049;3050;3230;3408;3409;3410;3411;3412;3434;3435;3436;6386;6387;6388;6389;7965;7966;11275;11282;11283;11284
P49722	P49722	5	5	5	Proteasome subunit alpha type-2	Psma2	sp|P49722|PSA2_MOUSE Proteasome subunit alpha type-2 OS=Mus musculus OX=10090 GN=Psma2 PE=1 SV=3	1	5	5	5	4	5	4	5	4	5	32.5	32.5	32.5	25.926	234	234	0	51.872	By MS/MS	By MS/MS	24.4	32.5	215720000	55834000	159890000	16594000	4294900	12299000	59753000	102890000	2	4	6				205	1623;2182;2344;2836;4711	True;True;True;True;True	1725;2322;2494;3017;5034	4188;4189;5875;5876;6384;6385;7764;7765;12885	3661;3662;5227;5228;5669;5670;6937;11421
P50247	P50247	4	4	4	Adenosylhomocysteinase	Ahcy	sp|P50247|SAHH_MOUSE Adenosylhomocysteinase OS=Mus musculus OX=10090 GN=Ahcy PE=1 SV=3	1	4	4	4	2	4	2	4	2	4	11.6	11.6	11.6	47.688	432	432	0	50.298	By matching	By MS/MS	5.3	11.6	87181000	16827000	70354000	3487200	673070	2814200	22380000	41447000	0	4	4				206	1432;4129;4162;4421	True;True;True;True	1526;4419;4453;4726	3719;11408;11409;11502;12197;12198	3245;10115;10199;10823
P50516	P50516	7	7	7	V-type proton ATPase catalytic subunit A	Atp6v1a	sp|P50516|VATA_MOUSE V-type proton ATPase catalytic subunit A OS=Mus musculus OX=10090 GN=Atp6v1a PE=1 SV=2	1	7	7	7	2	7	2	7	2	7	16.7	16.7	16.7	68.325	617	617	0	49.478	By matching	By MS/MS	7.3	16.7	111640000	9358900	102280000	3283500	275260	3008300	11688000	66001000	0	8	8				207	226;889;1161;2672;4254;4329;4744	True;True;True;True;True;True;True	246;952;1235;2849;4548;4627;5068	624;2346;2993;7303;7304;11747;11748;11947;11948;12953	553;2043;2621;6549;6550;10417;10594;11481
P50580	P50580	11	11	11	Proliferation-associated protein 2G4	PA2G4;Pa2g4	sp|P50580|PA2G4_MOUSE Proliferation-associated protein 2G4 OS=Mus musculus OX=10090 GN=Pa2g4 PE=1 SV=3	2	11	11	11	11	11	11	11	11	11	42.6	42.6	42.6	43.786	394	394;394	0	159.62	By MS/MS	By MS/MS	42.6	42.6	814050000	370020000	444040000	37002000	16819000	20184000	370120000	296540000	8	8	16				208	122;853;1412;1637;2033;2824;3360;3522;3654;3935;4138	True;True;True;True;True;True;True;True;True;True;True	132;914;1506;1739;2164;3005;3607;3786;3923;4214;4429	331;332;2243;2244;3677;3678;4216;4217;5440;5441;7737;7738;9271;9272;9775;9776;9777;9778;10115;10116;10873;10874;11435;11436	289;290;1953;1954;3217;3682;4821;4822;6917;8236;8668;8669;8962;9620;9621;10137
P51150;Q9XI98;Q9LW76;Q9LS94;Q9C820;O04157	P51150	7;2;2;2;2;1	7;2;2;2;2;1	7;2;2;2;2;1	Ras-related protein Rab-7a	Rab7a	sp|P51150|RAB7A_MOUSE Ras-related protein Rab-7a OS=Mus musculus OX=10090 GN=Rab7a PE=1 SV=2	6	7	7	7	4	7	4	7	4	7	43.5	43.5	43.5	23.489	207	207;206;206;206;206;203	0	56.589	By MS/MS	By MS/MS	22.7	43.5	282660000	34458000	248200000	20190000	2461300	17729000	40217000	160050000	2	6	8				209	410;684;788;1226;1296;2847;3086	True;True;True;True;True;True;True	444;737;844;1313;1385;3030;3313	1082;1083;1829;1830;2082;2083;3206;3207;3385;7793;8536	939;1593;1594;1805;2812;2970;6963;7610
P51410;Q9SZX9;P49209	P51410	15;2;2	15;2;2	15;2;2	60S ribosomal protein L9	Rpl9	sp|P51410|RL9_MOUSE 60S ribosomal protein L9 OS=Mus musculus OX=10090 GN=Rpl9 PE=2 SV=2	3	15	15	15	13	14	13	14	13	14	73.4	73.4	73.4	21.881	192	192;194;194	0	250.02	By MS/MS	By MS/MS	62	69.3	53416000000	21240000000	32176000000	5935100000	2360000000	3575100000	18437000000	21761000000	29	60	89				210	549;568;569;1175;1602;2123;2124;3352;3353;3804;3908;3909;3925;3937;4182	True;True;True;True;True;True;True;True;True;True;True;True;True;True;True	589;609;610;1255;1703;2259;2260;3598;3599;4076;4186;4187;4203;4204;4216;4475	1427;1428;1429;1430;1477;1478;1479;1480;1481;1482;1483;1484;1485;1486;1487;1488;1489;3048;3049;3050;3051;3052;3053;4143;4144;5693;5694;5695;5696;5697;5698;5699;5700;5701;5702;9227;9228;9229;9230;9231;9232;9233;9234;9235;9236;10511;10790;10791;10792;10793;10794;10795;10796;10797;10798;10799;10800;10801;10842;10843;10844;10845;10846;10847;10848;10849;10850;10851;10879;10880;10881;10882;10883;11567;…	1240;1241;1242;1243;1283;1284;1285;1286;1287;1288;1289;1290;1291;1292;1293;1294;1295;1296;2675;2676;2677;2678;2679;2680;3622;3623;3624;3625;5058;5059;5060;5061;5062;5063;5064;5065;5066;5067;5068;8199;8200;8201;8202;8203;8204;8205;8206;8207;8208;9293;9532;9533;9534;9535;9536;9537;9538;9539;9540;9541;9542;9543;9544;9545;9546;9547;9548;9549;9550;9551;9593;9594;9595;9596;9597;9598;9599;9600;9601;9602…
P51859	P51859	4	4	4	Hepatoma-derived growth factor	Hdgf	sp|P51859|HDGF_MOUSE Hepatoma-derived growth factor OS=Mus musculus OX=10090 GN=Hdgf PE=1 SV=2	1	4	4	4	0	4	0	4	0	4	25.7	25.7	25.7	26.268	237	237	0	43.32		By MS/MS	0	25.7	114040000	0	114040000	7127500	0	7127500	0	76185000	0	4	4				211	1016;1373;2138;4734	True;True;True;True	1085;1465;2275;5058	2666;3568;5739;12932	2320;3120;5103;11465
P51863	P51863	9	9	9	V-type proton ATPase subunit d 1	Atp6v0d1	sp|P51863|VA0D1_MOUSE V-type proton ATPase subunit d 1 OS=Mus musculus OX=10090 GN=Atp6v0d1 PE=1 SV=2	1	9	9	9	3	9	3	9	3	9	36.2	36.2	36.2	40.301	351	351	0	56.934	By MS/MS	By MS/MS	8	36.2	336430000	29765000	306660000	21027000	1860300	19166000	43699000	190930000	1	6	7				212	125;471;1098;2444;2496;2870;3027;3137;3553	True;True;True;True;True;True;True;True;True	135;509;1167;2601;2657;3054;3251;3371;3819	336;1229;2835;6646;6647;6774;7851;7852;8381;8671;8672;9843	294;1064;2468;5906;6018;7014;7479;7722;8723
P51881	P51881	14	6	6	ADP/ATP translocase 2;ADP/ATP translocase 2, N-terminally processed	Slc25a5	sp|P51881|ADT2_MOUSE ADP/ATP translocase 2 OS=Mus musculus OX=10090 GN=Slc25a5 PE=1 SV=3	1	14	6	6	13	12	6	5	6	5	53	22.5	22.5	32.931	298	298	0	38.067	By MS/MS	By MS/MS	44	49.3	1471700000	909740000	561920000	73583000	45487000	28096000	871910000	413220000	5	4	9				213	51;563;1001;1319;1424;1496;1507;2148;2614;3245;3846;4643;4647;4648	True;True;True;False;False;False;False;True;False;True;True;False;False;False	53;604;1069;1410;1518;1590;1591;1605;2285;2778;3486;4119;4958;4964;4965	110;111;1468;1469;1470;1471;2616;3454;3455;3697;3698;3885;3886;3887;3888;3889;3890;3919;3920;3921;3922;5761;5762;7114;7115;7116;7117;8949;8950;10609;10610;12721;12729;12730;12731	93;94;1275;1276;1277;2273;3026;3027;3230;3408;3409;3410;3411;3412;3434;3435;3436;5127;6386;6387;6388;6389;7964;9378;9379;11275;11282;11283;11284
P52480;P14618;P53657	P52480;P14618	7;5;1	7;5;1	7;5;1	Pyruvate kinase PKM	Pkm;PKM	sp|P52480|KPYM_MOUSE Pyruvate kinase PKM OS=Mus musculus OX=10090 GN=Pkm PE=1 SV=4;sp|P14618|KPYM_HUMAN Pyruvate kinase PKM OS=Homo sapiens OX=9606 GN=PKM PE=1 SV=4	3	7	7	7	5	7	5	7	5	7	20.5	20.5	20.5	57.844	531	531;531;574	0	56.52	By MS/MS	By MS/MS	15.1	20.5	259790000	68195000	191590000	7872300	2066500	5805800	71658000	124530000	4	6	10				214	775;1297;1332;1596;2340;2385;3128	True;True;True;True;True;True;True	830;1386;1423;1697;2490;2539;3362	2054;2055;3386;3480;3481;4133;4134;6374;6375;6376;6377;6513;8655;8656	1782;1783;2971;3047;3613;5660;5661;5662;5663;5783;7710;7711
P53026	P53026	18	18	18	60S ribosomal protein L10a	Rpl10a	sp|P53026|RL10A_MOUSE 60S ribosomal protein L10a OS=Mus musculus OX=10090 GN=Rpl10a PE=1 SV=3	1	18	18	18	17	14	17	14	17	14	43.8	43.8	43.8	24.916	217	217	0	197.95	By MS/MS	By MS/MS	43.8	38.7	76403000000	41736000000	34668000000	7640300000	4173600000	3466800000	32772000000	25916000000	46	37	83				215	162;163;435;436;713;714;1184;1218;1219;2093;2094;2125;2282;2304;4328;4480;4481;4625	True;True;True;True;True;True;True;True;True;True;True;True;True;True;True;True;True;True	173;174;175;176;469;470;471;472;767;768;1264;1304;1305;1306;2227;2228;2261;2428;2451;4626;4788;4789;4940	420;421;422;423;424;425;426;427;428;429;430;431;432;433;434;1132;1133;1134;1135;1136;1137;1138;1139;1140;1141;1142;1143;1144;1145;1146;1147;1148;1149;1150;1151;1892;1893;1894;1895;1896;3071;3183;3184;3185;3186;3187;3188;3189;3190;3191;3192;5612;5613;5614;5615;5703;5704;6217;6218;6219;6220;6275;6276;6277;6278;6279;6280;11943;11944;11945;11946;12340;12341;12342;12343;12682;12683	363;364;365;366;367;368;369;370;371;372;373;374;375;376;377;977;978;979;980;981;982;983;984;985;986;987;988;989;990;991;992;993;1644;1645;1646;1647;1648;2696;2786;2787;2788;2789;2790;2791;2792;2793;2794;2795;2796;2797;2798;2799;2800;4986;4987;4988;4989;5069;5526;5527;5528;5529;5577;5578;5579;5580;5581;5582;5583;5584;5585;5586;5587;5588;5589;10590;10591;10592;10593;10945;10946;10947;10948;11242;11…
P53994;Q38922;P92963;P59279	P53994;Q38922;P92963;P59279	2;1;1;1	2;1;1;1	2;1;1;1	Ras-related protein Rab-2A;Ras-related protein RABB1b;Ras-related protein RABB1c;Ras-related protein Rab-2B	Rab2a;RABB1B;RABB1C;Rab2b	sp|P53994|RAB2A_MOUSE Ras-related protein Rab-2A OS=Mus musculus OX=10090 GN=Rab2a PE=1 SV=1;sp|Q38922|RAB1B_ARATH Ras-related protein RABB1b OS=Arabidopsis thaliana OX=3702 GN=RABB1B PE=2 SV=1;sp|P92963|RAB1C_ARATH Ras-related protein RABB1c OS=Arabidopsi	4	2	2	2	1	2	1	2	1	2	12.7	12.7	12.7	23.547	212	212;211;211;216	0	15.761	By matching	By MS/MS	6.1	12.7	37334000	4764400	32570000	2666700	340310	2326400	0	21759000	0	2	2				216	1292;3833	True;True	1381;4106	3377;3378;10576	2965;9346
P54116	P54116	4	4	4	Erythrocyte band 7 integral membrane protein	Stom	sp|P54116|STOM_MOUSE Erythrocyte band 7 integral membrane protein OS=Mus musculus OX=10090 GN=Stom PE=1 SV=3	1	4	4	4	1	4	1	4	1	4	18	18	18	31.375	284	284	0	27.497	By MS/MS	By MS/MS	5.6	18	234220000	1491100	232730000	15615000	99407	15515000	0	155480000	1	4	5				217	796;1522;2692;4701	True;True;True;True	853;1621;2869;5023	2102;3954;3955;7339;12856	1824;3466;3467;6579;11400
P54276	P54276	3	3	3	DNA mismatch repair protein Msh6	Msh6	sp|P54276|MSH6_MOUSE DNA mismatch repair protein Msh6 OS=Mus musculus OX=10090 GN=Msh6 PE=1 SV=3	1	3	3	3	1	3	1	3	1	3	2.9	2.9	2.9	151.08	1358	1358	0	17.91	By matching	By MS/MS	0.9	2.9	24231000	331200	23900000	341280	4664.7	336620	0	15967000	0	1	1				218	1869;4471;4555	True;True;True	1987;4779;4866	4933;4934;12321;12504	4353;10930;11086
P54823	P54823	5	5	5	Probable ATP-dependent RNA helicase DDX6	Ddx6	sp|P54823|DDX6_MOUSE Probable ATP-dependent RNA helicase DDX6 OS=Mus musculus OX=10090 GN=Ddx6 PE=1 SV=1	1	5	5	5	2	5	2	5	2	5	17.2	17.2	17.2	54.191	483	483	0	75.325	By MS/MS	By MS/MS	5.6	17.2	233170000	19545000	213620000	8327400	698030	7629400	39487000	122770000	2	5	7				219	368;1603;3249;3556;3662	True;True;True;True;True	401;1704;3490;3822;3931	1003;4145;4146;8957;8958;9847;9848;10138	873;3626;3627;7971;7972;8726;8727;8983
Q01853;P55072	Q01853;P55072	19;19	19;19	18;18	Transitional endoplasmic reticulum ATPase	Vcp;VCP	sp|Q01853|TERA_MOUSE Transitional endoplasmic reticulum ATPase OS=Mus musculus OX=10090 GN=Vcp PE=1 SV=4;sp|P55072|TERA_HUMAN Transitional endoplasmic reticulum ATPase OS=Homo sapiens OX=9606 GN=VCP PE=1 SV=4	2	19	19	18	15	18	15	18	14	17	32.6	32.6	30.9	89.321	806	806;806	0	175.82	By MS/MS	By MS/MS	24.8	32.5	739730000	216340000	523390000	16438000	4807600	11631000	214050000	351950000	7	21	28				220	192;202;371;725;961;962;977;1040;1052;2319;2394;2414;2536;2884;2963;2964;3139;3197;4568	True;True;True;True;True;True;True;True;True;True;True;True;True;True;True;True;True;True;True	209;219;404;779;1025;1026;1042;1109;1121;2466;2548;2569;2698;3070;3182;3183;3373;3434;4880	523;524;540;541;1007;1008;1913;1914;2530;2531;2532;2533;2534;2570;2713;2714;2735;2736;6315;6527;6528;6575;6576;6577;6873;7912;7913;8175;8176;8675;8676;8677;8678;8818;8819;8820;8821;12546;12547	457;458;473;474;876;877;1660;2204;2205;2206;2207;2235;2358;2359;2377;5618;5794;5795;5840;5841;6124;7067;7068;7286;7287;7724;7725;7851;7852;11129
P55096	P55096	2	2	2	ATP-binding cassette sub-family D member 3	Abcd3	sp|P55096|ABCD3_MOUSE ATP-binding cassette sub-family D member 3 OS=Mus musculus OX=10090 GN=Abcd3 PE=1 SV=2	1	2	2	2	1	2	1	2	1	2	3.9	3.9	3.9	75.474	659	659	0	12.259	By matching	By MS/MS	2.1	3.9	46789000	7026800	39762000	1199700	180170	1019500	0	26563000	0	2	2				221	1072;4352	True;True	1141;4651	2774;2775;12009	2410;10658
P56395	P56395	4	4	4	Cytochrome b5	Cyb5a	sp|P56395|CYB5_MOUSE Cytochrome b5 OS=Mus musculus OX=10090 GN=Cyb5a PE=1 SV=2	1	4	4	4	1	4	1	4	1	4	32.1	32.1	32.1	15.241	134	134	0	26.357	By matching	By MS/MS	6.7	32.1	279220000	4425800	274790000	46537000	737630	45799000	0	183580000	0	7	7				222	1179;3773;4119;4781	True;True;True;True	1259;4045;4409;5106	3059;3060;10438;11389;11390;13041;13042	2684;2685;9234;9235;10096;10097;11566
P56480;P19366	P56480	16;1	16;1	12;1	ATP synthase subunit beta, mitochondrial	Atp5b	sp|P56480|ATPB_MOUSE ATP synthase subunit beta, mitochondrial OS=Mus musculus OX=10090 GN=Atp5f1b PE=1 SV=2	2	16	16	12	13	16	13	16	10	12	44.2	44.2	32.5	56.3	529	529;498	0	197.95	By MS/MS	By MS/MS	38.9	44.2	1628500000	380220000	1248200000	56153000	13111000	43042000	393730000	820370000	9	19	28				223	182;191;1256;1487;1562;1955;1980;2147;2826;3923;4097;4141;4142;4340;4341;4517	True;True;True;True;True;True;True;True;True;True;True;True;True;True;True;True	196;208;1344;1581;1662;2077;2108;2284;3007;4201;4384;4432;4433;4639;4640;4827	480;481;482;483;520;521;522;3279;3280;3281;3861;3862;4049;4050;5223;5224;5308;5309;5759;5760;7741;7742;7743;7744;10838;10839;11328;11329;11441;11442;11978;11979;11980;11981;11982;11983;12417;12418	421;422;423;424;454;455;456;2877;2878;3386;3541;3542;4625;4626;4713;5126;6919;6920;6921;6922;9591;10041;10042;10140;10141;10629;10630;10631;10632;10633;11010;11011
P57776	P57776	2	2	2	Elongation factor 1-delta	Eef1d	sp|P57776|EF1D_MOUSE Elongation factor 1-delta OS=Mus musculus OX=10090 GN=Eef1d PE=1 SV=3	1	2	2	2	2	1	2	1	2	1	8.9	8.9	8.9	31.293	281	281	0	12.932	By MS/MS	By MS/MS	8.9	4.6	17088000	11912000	5175500	1005200	700730	304440	11912000	0	0	0	0				224	1605;3571	True;True	1706;3839	4149;9883;9884	3630;8755
P57784	P57784	2	2	2	U2 small nuclear ribonucleoprotein A	Snrpa1	sp|P57784|RU2A_MOUSE U2 small nuclear ribonucleoprotein A OS=Mus musculus OX=10090 GN=Snrpa1 PE=1 SV=2	1	2	2	2	2	2	2	2	2	2	11	11	11	28.357	255	255	0	35.97	By MS/MS	By MS/MS	11	11	56152000	4444000	51708000	5615200	444400	5170800	0	34544000	1	3	4				225	1476;2766	True;True	1570;2943	3839;3840;7517;7518;7519	3367;3368;6726;6727
P58064	P58064	2	2	2	28S ribosomal protein S6, mitochondrial	Mrps6	sp|P58064|RT06_MOUSE 28S ribosomal protein S6, mitochondrial OS=Mus musculus OX=10090 GN=Mrps6 PE=1 SV=3	1	2	2	2	1	2	1	2	1	2	16.8	16.8	16.8	14.308	125	125	0	13.624	By matching	By MS/MS	6.4	16.8	77862000	8128000	69734000	9732800	1016000	8716800	0	46587000	0	2	2				226	808;3050	True;True	865;3275	2133;8453;8454	1853;7540
P58252;P13639;Q9ASR1	P58252;P13639	12;11;1	12;11;1	12;11;1	Elongation factor 2	Eef2;EEF2	sp|P58252|EF2_MOUSE Elongation factor 2 OS=Mus musculus OX=10090 GN=Eef2 PE=1 SV=2;sp|P13639|EF2_HUMAN Elongation factor 2 OS=Homo sapiens OX=9606 GN=EEF2 PE=1 SV=4	3	12	12	12	8	12	8	12	8	12	17.8	17.8	17.8	95.313	858	858;858;843	0	85.698	By MS/MS	By MS/MS	11.5	17.8	897430000	161710000	735720000	19943000	3593600	16349000	174150000	479060000	2	14	16				227	161;366;472;825;860;1244;1408;2171;3766;3882;4215;4408	True;True;True;True;True;True;True;True;True;True;True;True	172;399;510;885;921;1331;1502;2311;4038;4158;4509;4712	418;419;997;998;999;1000;1230;2191;2192;2254;2255;3239;3665;3666;5844;10424;10425;10735;10736;11646;11647;12155;12156	362;867;868;869;870;1065;1909;1910;1963;2841;3207;5202;9225;9486;9487;10323;10782
P58501	P58501	3	3	3	PAX3- and PAX7-binding protein 1	Paxbp1	sp|P58501|PAXB1_MOUSE PAX3- and PAX7-binding protein 1 OS=Mus musculus OX=10090 GN=Paxbp1 PE=1 SV=3	1	3	3	3	0	3	0	3	0	3	5	5	5	104.83	919	919	0	17.239		By MS/MS	0	5	13568000	0	13568000	315530	0	315530	0	9064000	0	2	2				228	381;2706;4217	True;True;True	415;2883;4511	1033;7364;11650	898;6601;10325
P59708	P59708	2	2	2	Splicing factor 3B subunit 6	Sf3b6	sp|P59708|SF3B6_MOUSE Splicing factor 3B subunit 6 OS=Mus musculus OX=10090 GN=Sf3b6 PE=1 SV=1	1	2	2	2	1	2	1	2	1	2	20.8	20.8	20.8	14.585	125	125	0	15.093	By matching	By MS/MS	11.2	20.8	63039000	11575000	51464000	7879900	1446900	6433000	0	34381000	0	2	2				229	1574;2019	True;True	1674;2148	4076;4077;5404	3565;4790
P59999	P59999	4	4	4	Actin-related protein 2/3 complex subunit 4	Arpc4	sp|P59999|ARPC4_MOUSE Actin-related protein 2/3 complex subunit 4 OS=Mus musculus OX=10090 GN=Arpc4 PE=1 SV=3	1	4	4	4	4	4	4	4	4	4	23.2	23.2	23.2	19.667	168	168	0	35.224	By MS/MS	By MS/MS	23.2	23.2	804680000	536120000	268560000	89409000	59569000	29840000	532580000	182960000	3	4	7				230	112;948;2038;3834	True;True;True;True	122;1012;2169;4107	304;305;2491;2492;5451;5452;10577;10578	263;264;2166;2167;4833;9347;9348
P60122	P60122	7	7	7	RuvB-like 1	Ruvbl1	sp|P60122|RUVB1_MOUSE RuvB-like 1 OS=Mus musculus OX=10090 GN=Ruvbl1 PE=1 SV=1	2	7	7	7	7	6	7	6	7	6	23.5	23.5	23.5	50.213	456	456;456	0	54.568	By MS/MS	By MS/MS	23.5	21.1	296780000	191070000	105720000	13490000	8684800	4805300	177500000	84189000	9	4	13				231	257;361;451;1575;2393;3825;4755	True;True;True;True;True;True;True	280;394;487;1675;2547;4098;5079	714;715;716;717;985;986;1185;1186;4078;4079;4080;6526;10560;10561;12978;12979	626;627;628;855;856;1025;3566;3567;3568;5793;9330;9331;11502;11503
P60229;P60228;Q9C5Z3	P60229;P60228	3;3;1	3;3;1	3;3;1	Eukaryotic translation initiation factor 3 subunit E	Eif3e;EIF3E	sp|P60229|EIF3E_MOUSE Eukaryotic translation initiation factor 3 subunit E OS=Mus musculus OX=10090 GN=Eif3e PE=1 SV=1;sp|P60228|EIF3E_HUMAN Eukaryotic translation initiation factor 3 subunit E OS=Homo sapiens OX=9606 GN=EIF3E PE=1 SV=1	3	3	3	3	1	3	1	3	1	3	6.5	6.5	6.5	52.22	445	445;445;441	0	16.277	By MS/MS	By MS/MS	1.6	6.5	21505000	7308800	14196000	768030	261030	507000	0	9483800	1	2	3				232	1689;3229;4585	True;True;True	1796;3468;4897	4388;8900;12579;12580	3856;7922;11156;11157
P60335;P57722	P60335	4;1	4;1	3;0	Poly(rC)-binding protein 1	Pcbp1	sp|P60335|PCBP1_MOUSE Poly(rC)-binding protein 1 OS=Mus musculus OX=10090 GN=Pcbp1 PE=1 SV=1	2	4	4	3	4	4	4	4	3	3	15.2	15.2	12.1	37.497	356	356;371	0	32.513	By MS/MS	By MS/MS	15.2	15.2	229140000	65955000	163190000	13479000	3879700	9599200	63376000	111600000	2	3	5				233	215;1898;1963;2851	True;True;True;True	235;2018;2088;3034	598;599;5029;5030;5249;5250;7802;7803	530;531;4447;4448;4653;6970
P60843;P10630	P60843;P10630	10;7	7;4	5;2	Eukaryotic initiation factor 4A-I;Eukaryotic initiation factor 4A-II;Eukaryotic initiation factor 4A-II, N-terminally processed	Eif4a1;Eif4a2	sp|P60843|IF4A1_MOUSE Eukaryotic initiation factor 4A-I OS=Mus musculus OX=10090 GN=Eif4a1 PE=1 SV=1;sp|P10630|IF4A2_MOUSE Eukaryotic initiation factor 4A-II OS=Mus musculus OX=10090 GN=Eif4a2 PE=1 SV=2	2	10	7	5	7	10	4	7	3	5	27.6	21.4	15.8	46.153	406	406;407	0	44.622	By MS/MS	By MS/MS	17.2	27.6	170190000	37726000	132470000	7399600	1640300	5759400	42821000	83400000	1	6	7				234	915;1366;1416;1444;2107;2276;2708;2896;3392;4361	True;True;True;False;True;False;True;True;False;True	978;1458;1510;1538;2242;2422;2885;3086;3640;4660	2409;2410;3550;3551;3552;3553;3684;3744;3745;3746;3747;5651;6207;6208;7367;7368;7941;9376;9377;12026;12027	2098;3105;3106;3221;3268;3269;3270;5022;5517;5518;6603;7089;8319;10671;10672
P60867	P60867	9	9	9	40S ribosomal protein S20	Rps20	sp|P60867|RS20_MOUSE 40S ribosomal protein S20 OS=Mus musculus OX=10090 GN=Rps20 PE=1 SV=1	1	9	9	9	9	8	9	8	9	8	52.9	52.9	52.9	13.373	119	119	0	125.11	By MS/MS	By MS/MS	52.9	49.6	73447000000	33369000000	40078000000	14689000000	6673800000	8015600000	36439000000	23654000000	20	17	37				235	129;710;2001;2264;2512;3399;3613;4034;4165	True;True;True;True;True;True;True;True;True	139;764;2129;2410;2673;3647;3882;4316;4456	343;344;345;346;347;1882;1883;1884;1885;5360;5361;6169;6170;6812;6813;6814;6815;6816;6817;9398;9399;9400;9401;9402;9403;10028;11138;11139;11140;11141;11142;11143;11509;11510	298;299;300;301;1635;1636;1637;1638;4755;5487;6053;6054;6055;6056;6057;6058;6059;6060;6061;6062;6063;6064;6065;8334;8335;8336;8337;8338;8339;8884;9866;9867;9868;9869;9870;10206;10207
P61089	P61089	2	2	2	Ubiquitin-conjugating enzyme E2 N	Ube2n	sp|P61089|UBE2N_MOUSE Ubiquitin-conjugating enzyme E2 N OS=Mus musculus OX=10090 GN=Ube2n PE=1 SV=1	1	2	2	2	0	2	0	2	0	2	13.8	13.8	13.8	17.138	152	152	0	11.095		By MS/MS	0	13.8	39273000	0	39273000	3927300	0	3927300	0	26237000	0	1	1				236	2567;4008	True;True	2730;4289	6985;11065	6225;9805
P61161	P61161	5	5	5	Actin-related protein 2	Actr2	sp|P61161|ARP2_MOUSE Actin-related protein 2 OS=Mus musculus OX=10090 GN=Actr2 PE=1 SV=1	1	5	5	5	5	4	5	4	5	4	16	16	16	44.76	394	394	0	39.312	By MS/MS	By MS/MS	16	12.7	267290000	201160000	66131000	20561000	15474000	5087000	211000000	34336000	6	0	6				237	1615;1690;1938;2300;2375	True;True;True;True;True	1717;1797;2059;2446;2528	4167;4168;4169;4170;4389;4390;5150;5151;6261;6486;6487	3644;3645;3857;4546;5564;5763;5764
P61222	P61222	3	3	3	ATP-binding cassette sub-family E member 1	Abce1	sp|P61222|ABCE1_MOUSE ATP-binding cassette sub-family E member 1 OS=Mus musculus OX=10090 GN=Abce1 PE=1 SV=1	1	3	3	3	2	3	2	3	2	3	9	9	9	67.314	599	599	0	17.94	By MS/MS	By MS/MS	6.2	9	32069000	14436000	17632000	1069000	481210	587750	14121000	12095000	2	0	2				238	503;859;2548	True;True;True	543;920;2711	1314;1315;2253;6906;6907	1141;1962;6150
P61255;Q9FJX2	P61255	16;3	16;3	16;3	60S ribosomal protein L26	Rpl26	sp|P61255|RL26_MOUSE 60S ribosomal protein L26 OS=Mus musculus OX=10090 GN=Rpl26 PE=1 SV=1	2	16	16	16	16	14	16	14	16	14	55.2	55.2	55.2	17.258	145	145;146	0	214.23	By MS/MS	By MS/MS	55.2	54.5	66490000000	28961000000	37530000000	11082000000	4826800000	6254900000	33252000000	19291000000	33	29	62				239	313;538;901;1206;1644;1645;1958;2100;2163;2308;2907;3375;3390;3665;4684;4771	True;True;True;True;True;True;True;True;True;True;True;True;True;True;True;True	341;578;964;1291;1747;1748;2082;2083;2234;2302;2303;2455;3101;3102;3622;3638;3934;3935;5001;5002;5096	851;852;853;854;855;856;1400;1401;1402;1403;2371;2372;2373;2374;2375;3152;3153;4231;4232;4233;4234;4235;4236;5234;5235;5236;5237;5238;5626;5627;5628;5629;5816;5817;5818;5819;5820;5821;6291;6292;6293;6294;7972;7973;7974;7975;7976;9318;9319;9320;9371;10142;10143;10144;10145;10146;10147;10148;10149;10150;10151;12803;12804;12805;12806;12807;13019;13020	734;735;736;737;738;1217;1218;1219;2062;2063;2064;2065;2760;2761;2762;3693;3694;3695;3696;3697;3698;3699;3700;3701;3702;3703;4636;4637;4638;4639;4640;4999;5000;5001;5002;5179;5180;5181;5182;5597;5598;5599;5600;7112;7113;7114;7115;7116;8271;8272;8314;8986;8987;8988;8989;8990;8991;8992;8993;8994;11349;11350;11351;11352;11542;11543;11544;11545
P61327;Q9CQL1	P61327;Q9CQL1	8;7	8;7	8;7	Protein mago nashi homolog;Protein mago nashi homolog 2	Magoh;Magohb	sp|P61327|MGN_MOUSE Protein mago nashi homolog OS=Mus musculus OX=10090 GN=Magoh PE=2 SV=1;sp|Q9CQL1|MGN2_MOUSE Protein mago nashi homolog 2 OS=Mus musculus OX=10090 GN=Magohb PE=2 SV=1	2	8	8	8	6	8	6	8	6	8	54.8	54.8	54.8	17.163	146	146;146	0	133.4	By MS/MS	By MS/MS	43.2	54.8	1186100000	186550000	999520000	118610000	18655000	99952000	220930000	617170000	3	12	15				240	1137;1446;1850;1851;1867;2892;3786;4234	True;True;True;True;True;True;True;True	1207;1540;1967;1968;1985;3080;3081;4058;4528	2935;2936;3750;4884;4885;4886;4887;4888;4889;4928;4929;4930;7929;7930;7931;7932;10478;10479;11706;11707	2576;2577;3273;4311;4312;4313;4314;4349;4350;4351;7080;7081;7082;9267;10382
P61358	P61358	12	12	12	60S ribosomal protein L27	Rpl27	sp|P61358|RL27_MOUSE 60S ribosomal protein L27 OS=Mus musculus OX=10090 GN=Rpl27 PE=1 SV=2	1	12	12	12	12	11	12	11	12	11	54.4	54.4	54.4	15.798	136	136	0	228.35	By MS/MS	By MS/MS	54.4	54.4	117800000000	57396000000	60399000000	19633000000	9566000000	10067000000	60601000000	33588000000	40	35	75				241	730;731;3009;3010;3039;4110;4111;4531;4559;4752;4753;4754	True;True;True;True;True;True;True;True;True;True;True;True	784;785;3233;3234;3264;4400;4401;4842;4870;4871;5076;5077;5078	1923;1924;1925;1926;1927;1928;1929;1930;8310;8311;8312;8313;8314;8315;8316;8317;8318;8319;8320;8321;8322;8323;8324;8325;8326;8327;8328;8329;8330;8331;8332;8333;8334;8335;8336;8337;8338;8339;8340;8341;8342;8422;8423;11366;11367;11368;11369;11370;11371;11372;11373;11374;11375;12450;12451;12514;12515;12516;12517;12518;12519;12520;12521;12522;12969;12970;12971;12972;12973;12974;12975;12976;12977	1668;1669;1670;1671;1672;1673;1674;1675;7411;7412;7413;7414;7415;7416;7417;7418;7419;7420;7421;7422;7423;7424;7425;7426;7427;7428;7429;7430;7431;7432;7433;7434;7435;7436;7437;7438;7439;7440;7441;7442;7513;10076;10077;10078;10079;10080;10081;10082;10083;10084;10085;11032;11033;11034;11035;11036;11037;11038;11039;11040;11103;11104;11105;11106;11107;11108;11109;11110;11493;11494;11495;11496;11497;11…
P83882	P83882	9	9	9	60S ribosomal protein L36a	Rpl36a	sp|P83882|RL36A_MOUSE 60S ribosomal protein L36a OS=Mus musculus OX=10090 GN=Rpl36a PE=3 SV=2	2	9	9	9	9	9	9	9	9	9	36.8	36.8	36.8	12.528	106	106;106	0	105.19	By MS/MS	By MS/MS	36.8	36.8	12090000000	5007100000	7083100000	3022500000	1251800000	1770800000	5414700000	4324300000	11	9	20				242	493;494;1641;1642;2050;2170;2243;2408;3312	True;True;True;True;True;True;True;True;True	531;532;1743;1744;2182;2310;2387;2563;3555	1280;1281;1282;1283;1284;1285;1286;1287;4221;4222;4223;4224;5500;5501;5502;5841;5842;5843;6079;6080;6081;6565;6566;9124;9125	1109;1110;1111;1112;1113;1114;1115;1116;3686;3687;3688;4880;4881;5200;5201;5404;5405;5831;5832;8114;8115
P61514	P61514	5	5	5	60S ribosomal protein L37a	Rpl37a	sp|P61514|RL37A_MOUSE 60S ribosomal protein L37a OS=Mus musculus OX=10090 GN=Rpl37a PE=1 SV=2	1	5	5	5	5	5	5	5	5	5	52.2	52.2	52.2	10.275	92	92	0	81.958	By MS/MS	By MS/MS	52.2	52.2	13036000000	5855800000	7179900000	3258900000	1463900000	1795000000	5805500000	4750600000	8	11	19				243	446;2160;3350;4083;4756	True;True;True;True;True	482;2299;3595;3596;4369;5080	1172;1173;1174;1175;5805;5806;5807;5808;9217;9218;9219;9220;9221;9222;9223;9224;11285;11286;11287;11288;11289;11290;11291;12980;12981	1015;1016;1017;1018;5170;5171;8192;8193;8194;8195;8196;9999;10000;10001;10002;10003;10004;10005;10006;10007;11504;11505
P61620	P61620	3	3	3	Protein transport protein Sec61 subunit alpha isoform 1	Sec61a1	sp|P61620|S61A1_MOUSE Protein transport protein Sec61 subunit alpha isoform 1 OS=Mus musculus OX=10090 GN=Sec61a1 PE=1 SV=2	1	3	3	3	1	3	1	3	1	3	8.6	8.6	8.6	52.264	476	476	0	21.771	By matching	By MS/MS	2.3	8.6	143090000	32084000	111010000	8943300	2005200	6938100	0	74161000	0	4	4				244	137;1037;1185	True;True;True	148;1106;1265	368;369;2708;3072;3073	319;2354;2697;2698
P61979	P61979	5	5	5	Heterogeneous nuclear ribonucleoprotein K	Hnrnpk	sp|P61979|HNRPK_MOUSE Heterogeneous nuclear ribonucleoprotein K OS=Mus musculus OX=10090 GN=Hnrnpk PE=1 SV=1	1	5	5	5	5	5	5	5	5	5	17.7	17.7	17.7	50.976	463	463	0	60.996	By MS/MS	By MS/MS	17.7	17.7	194590000	55441000	139150000	8460300	2410500	6049900	59228000	89171000	3	5	8				245	1571;1877;1896;3061;3859	True;True;True;True;True	1671;1995;2016;3286;4134	4070;4071;4958;4959;5025;5026;8480;8481;10663;10664	3560;3561;4374;4375;4444;7563;7564;9425
P61982	P61982	3	2	2	14-3-3 protein gamma;14-3-3 protein gamma, N-terminally processed	Ywhag	sp|P61982|1433G_MOUSE 14-3-3 protein gamma OS=Mus musculus OX=10090 GN=Ywhag PE=1 SV=2	1	3	2	2	2	3	1	2	1	2	13.4	9.3	9.3	28.302	247	247	0	15.203	By matching	By MS/MS	9.7	13.4	51627000	11602000	40025000	3226700	725130	2501600	0	26739000	0	1	1				246	707;3152;4191	False;True;True	760;761;3388;4484	1872;1873;1874;1875;8717;8718;11587	1627;1628;1629;7757;10274
P62082	P62082	20	20	20	40S ribosomal protein S7	Rps7	sp|P62082|RS7_MOUSE 40S ribosomal protein S7 OS=Mus musculus OX=10090 GN=Rps7 PE=2 SV=1	1	20	20	20	20	17	20	17	20	17	76.3	76.3	76.3	22.127	194	194	0	323.31	By MS/MS	By MS/MS	76.3	66.5	51699000000	16883000000	34817000000	5169900000	1688300000	3481700000	19249000000	20435000000	47	65	112				247	203;359;360;738;958;1737;1942;2048;2083;2208;2520;2775;2895;3385;3995;3996;4211;4212;4263;4264	True;True;True;True;True;True;True;True;True;True;True;True;True;True;True;True;True;True;True;True	220;392;393;792;1022;1850;2064;2179;2180;2216;2350;2682;2952;3085;3633;4276;4277;4504;4505;4558;4559	542;543;544;545;546;547;548;549;550;551;552;553;973;974;975;976;977;978;979;980;981;982;983;984;1953;1954;2524;2525;4565;4566;5160;5161;5490;5491;5492;5493;5494;5495;5496;5497;5581;5582;5583;5584;5966;5967;6839;7533;7534;7535;7536;7537;7538;7937;7938;7939;7940;9357;9358;11016;11017;11018;11019;11020;11021;11022;11023;11024;11025;11026;11027;11028;11029;11030;11031;11032;11033;11034;11035;11036;11…	475;476;477;478;479;480;481;482;483;484;485;486;487;488;489;844;845;846;847;848;849;850;851;852;853;854;1697;2199;2200;4019;4020;4554;4555;4872;4873;4874;4875;4876;4877;4956;4957;4958;4959;4960;4961;5303;5304;6087;6737;6738;6739;6740;6741;6742;7086;7087;7088;8303;8304;9744;9745;9746;9747;9748;9749;9750;9751;9752;9753;9754;9755;9756;9757;9758;9759;9760;9761;9762;9763;9764;9765;9766;9767;9768;9769;…
P62137	P62137	3	2	2	Serine/threonine-protein phosphatase PP1-alpha catalytic subunit	Ppp1ca	sp|P62137|PP1A_MOUSE Serine/threonine-protein phosphatase PP1-alpha catalytic subunit OS=Mus musculus OX=10090 GN=Ppp1ca PE=1 SV=1	1	3	2	2	1	3	0	2	0	2	12.4	8.2	8.2	37.54	330	330	0	11.429	By matching	By MS/MS	4.2	12.4	13473000	0	13473000	748520	0	748520	0	9000900	0	0	0				248	1771;2656;4661	False;True;True	1887;2825;4978	4674;4675;7222;12755	4127;6480;11304
P62242	P62242	22	22	20	40S ribosomal protein S8	Rps8	sp|P62242|RS8_MOUSE 40S ribosomal protein S8 OS=Mus musculus OX=10090 GN=Rps8 PE=1 SV=2	1	22	22	20	22	19	22	19	20	17	62.5	62.5	55.8	24.205	208	208	0	323.31	By MS/MS	By MS/MS	62.5	61.5	151870000000	85090000000	66779000000	16874000000	9454500000	7419800000	86106000000	41876000000	56	36	92				249	71;72;73;284;285;926;927;1871;2012;2305;2400;2401;2563;2564;2792;2793;2794;2971;2972;3339;4044;4637	True;True;True;True;True;True;True;True;True;True;True;True;True;True;True;True;True;True;True;True;True;True	74;75;76;307;308;989;990;1989;2141;2452;2555;2556;2726;2727;2972;2973;2974;3190;3191;3583;4326;4952	158;159;160;161;162;163;164;165;166;167;168;169;170;171;172;173;769;770;771;772;2432;2433;2434;2435;2436;2437;4936;4937;4938;4939;4940;4941;4942;4943;4944;4945;4946;4947;4948;4949;4950;5384;5385;5386;5387;5388;5389;5390;6281;6282;6283;6284;6285;6545;6546;6547;6548;6549;6550;6551;6552;6553;6971;6972;6973;6974;6975;6976;6977;6978;7598;7599;7600;7601;7602;7603;7604;7605;7606;7607;7608;7609;7610;7611…	139;140;141;142;143;144;145;146;147;148;149;150;151;666;667;668;2116;2117;2118;2119;2120;2121;2122;4355;4356;4357;4358;4359;4360;4361;4362;4363;4364;4365;4366;4367;4368;4774;4775;4776;4777;4778;4779;4780;4781;5590;5591;5592;5593;5808;5809;5810;5811;5812;5813;5814;5815;5816;6212;6213;6214;6215;6216;6217;6787;6788;6789;6790;6791;6792;6793;6794;6795;6796;6797;6798;6799;6800;6801;6802;6803;7295;7296;…
P62245;Q9LX88;P42798	P62245	15;3;1	15;3;1	15;3;1	40S ribosomal protein S15a	Rps15a	sp|P62245|RS15A_MOUSE 40S ribosomal protein S15a OS=Mus musculus OX=10090 GN=Rps15a PE=1 SV=2	3	15	15	15	14	15	14	15	14	15	76.9	76.9	76.9	14.839	130	130;130;130	0	232.15	By MS/MS	By MS/MS	71.5	76.9	78137000000	33913000000	44224000000	9767200000	4239200000	5528000000	35261000000	24909000000	37	45	82				250	486;633;1106;1107;1196;1661;1662;2055;2928;3231;3232;3330;3430;4460;4598	True;True;True;True;True;True;True;True;True;True;True;True;True;True;True	524;677;1176;1177;1276;1277;1278;1765;1766;2187;3134;3135;3470;3471;3472;3473;3574;3682;4765;4766;4910	1269;1660;1661;1662;1663;2861;2862;2863;2864;2865;2866;2867;2868;2869;3092;3093;3094;3095;3096;3097;3098;3099;3100;3101;3102;3103;3104;4288;4289;4290;4291;4292;4293;4294;4295;4296;4297;4298;4299;4300;4301;4302;4303;4304;5511;5512;8061;8062;8063;8064;8065;8066;8903;8904;8905;8906;8907;8908;8909;8910;8911;8912;8913;8914;8915;8916;8917;8918;8919;8920;8921;8922;8923;9162;9163;9164;9165;9495;9496;9497…	1101;1437;1438;1439;1440;2501;2502;2503;2504;2505;2506;2507;2714;2715;2716;2717;2718;2719;2720;2721;2722;2723;2724;3755;3756;3757;3758;3759;3760;3761;3762;3763;3764;3765;3766;3767;3768;3769;3770;3771;3772;3773;3774;4889;4890;4891;7190;7191;7192;7193;7194;7195;7196;7924;7925;7926;7927;7928;7929;7930;7931;7932;7933;7934;7935;7936;7937;7938;7939;7940;7941;7942;8147;8148;8149;8415;8416;8417;8418;1090…
P62259	P62259	7	6	6	14-3-3 protein epsilon	Ywhae	sp|P62259|1433E_MOUSE 14-3-3 protein epsilon OS=Mus musculus OX=10090 GN=Ywhae PE=1 SV=1	1	7	6	6	4	7	3	6	3	6	34.5	30.6	30.6	29.174	255	255	0	52.656	By MS/MS	By MS/MS	17.6	34.5	340650000	47639000	293020000	20038000	2802300	17236000	60761000	182630000	1	7	8				251	14;707;768;1675;2508;2883;4688	True;False;True;True;True;True;True	14;760;761;823;1782;2669;3069;5006	25;26;1872;1873;1874;1875;2042;2043;4357;6804;6805;7910;7911;12818	23;24;1627;1628;1629;1774;3828;6045;6046;7066;11361
P62264;Q9SIH0;Q9CAX6;P42036	P62264	11;5;5;5	11;5;5;5	11;5;5;5	40S ribosomal protein S14	Rps14	sp|P62264|RS14_MOUSE 40S ribosomal protein S14 OS=Mus musculus OX=10090 GN=Rps14 PE=1 SV=3	4	11	11	11	11	11	11	11	11	11	43	43	43	16.273	151	151;150;150;150	0	323.31	By MS/MS	By MS/MS	43	43	69533000000	30640000000	38893000000	17383000000	7660000000	9723200000	26628000000	28757000000	27	34	61				252	89;492;553;934;1790;1791;1848;1849;3954;4025;4309	True;True;True;True;True;True;True;True;True;True;True	93;94;530;593;594;998;1906;1907;1965;1966;4234;4306;4606;4607	210;211;212;213;214;215;216;217;218;219;220;221;222;1278;1279;1435;1436;1437;1438;1439;1440;1441;1442;2459;2460;2461;4720;4721;4722;4723;4724;4725;4726;4727;4728;4729;4730;4731;4732;4733;4875;4876;4877;4878;4879;4880;4881;4882;4883;10925;10926;10927;10928;11120;11121;11889;11890;11891;11892;11893;11894;11895;11896;11897;11898;11899;11900;11901;11902	181;182;183;184;185;186;187;188;189;190;191;1108;1247;1248;1249;1250;1251;1252;1253;2144;2145;2146;2147;4169;4170;4171;4172;4173;4174;4175;4176;4177;4178;4179;4180;4303;4304;4305;4306;4307;4308;4309;4310;9673;9674;9675;9676;9850;9851;10541;10542;10543;10544;10545;10546;10547;10548;10549;10550;10551;10552;10553;10554
P62267;Q9SF35;P49201	P62267	9;2;2	9;2;2	9;2;2	40S ribosomal protein S23	Rps23	sp|P62267|RS23_MOUSE 40S ribosomal protein S23 OS=Mus musculus OX=10090 GN=Rps23 PE=1 SV=3	3	9	9	9	8	9	8	9	8	9	58	58	58	15.807	143	143;142;142	0	78.679	By MS/MS	By MS/MS	58	58	45713000000	17324000000	28389000000	7618800000	2887400000	4731500000	19621000000	16572000000	11	27	38				253	185;317;1400;1441;2020;2079;2140;2167;4146	True;True;True;True;True;True;True;True;True	199;345;1493;1535;2149;2211;2277;2307;4437	488;489;490;491;863;864;865;866;867;868;3637;3638;3639;3640;3739;3740;5405;5406;5407;5408;5569;5570;5742;5743;5744;5745;5831;5832;5833;5834;5835;5836;11447;11448;11449;11450;11451;11452;11453;11454;11455;11456;11457;11458;11459	428;429;430;744;745;746;747;3179;3180;3181;3182;3263;3264;4791;4792;4793;4794;4795;4946;5106;5107;5108;5109;5192;5193;5194;5195;5196;5197;10145;10146;10147;10148;10149;10150;10151;10152;10153;10154;10155;10156;10157;10158
P62270;P34788	P62270	22;1	22;1	22;1	40S ribosomal protein S18	Rps18	sp|P62270|RS18_MOUSE 40S ribosomal protein S18 OS=Mus musculus OX=10090 GN=Rps18 PE=1 SV=3	2	22	22	22	21	18	21	18	21	18	69.7	69.7	69.7	17.718	152	152;152	0	279.8	By MS/MS	By MS/MS	69.7	67.8	98549000000	46029000000	52520000000	10950000000	5114300000	5835600000	45549000000	34301000000	40	35	75				254	77;153;154;574;733;1748;1973;2074;2075;2155;3340;3346;3451;3656;4307;4371;4372;4614;4615;4747;4748;4749	True;True;True;True;True;True;True;True;True;True;True;True;True;True;True;True;True;True;True;True;True;True	80;164;165;615;787;1863;2101;2206;2207;2294;3584;3590;3703;3925;4603;4604;4671;4672;4928;4929;5071;5072;5073	188;403;404;405;406;407;1495;1496;1937;1938;4604;4605;4606;4607;5292;5293;5552;5553;5554;5555;5556;5557;5558;5783;5784;5785;5786;9193;9194;9202;9203;9204;9205;9206;9207;9559;9560;10119;10120;10121;10122;10123;11877;11878;11879;11880;11881;11882;11883;11884;11885;11886;11887;12057;12058;12059;12060;12061;12062;12063;12646;12647;12648;12649;12956;12957;12958;12959;12960;12961;12962;12963;12964	163;349;350;351;352;353;1301;1302;1681;4048;4049;4050;4051;4052;4694;4695;4696;4697;4698;4699;4700;4701;4702;4703;4928;4929;4930;4931;4932;5146;5147;5148;5149;8173;8174;8181;8182;8183;8184;8185;8478;8965;8966;8967;8968;8969;8970;8971;10525;10526;10527;10528;10529;10530;10531;10532;10533;10534;10535;10536;10537;10538;10539;10700;10701;10702;10703;10704;10705;11210;11211;11212;11213;11484;11485;114…
P62281;P62280	P62281;P62280	21;21	21;21	21;21	40S ribosomal protein S11	Rps11;RPS11	sp|P62281|RS11_MOUSE 40S ribosomal protein S11 OS=Mus musculus OX=10090 GN=Rps11 PE=1 SV=3;sp|P62280|RS11_HUMAN 40S ribosomal protein S11 OS=Homo sapiens OX=9606 GN=RPS11 PE=1 SV=3	2	21	21	21	20	19	20	19	20	19	60.1	60.1	60.1	18.431	158	158;158	0	218.31	By MS/MS	By MS/MS	60.1	58.2	113490000000	50143000000	63351000000	11349000000	5014300000	6335100000	51587000000	39543000000	36	34	70				255	504;743;744;762;763;784;785;786;1672;1946;2098;3078;3300;3301;3356;3446;3447;4029;4365;4366;4367	True;True;True;True;True;True;True;True;True;True;True;True;True;True;True;True;True;True;True;True;True	544;797;798;816;817;840;841;842;1778;1779;2068;2232;3304;3305;3542;3543;3603;3698;3699;4311;4664;4665;4666	1316;1317;1318;1319;1968;1969;1970;1971;1972;1973;1974;1975;1976;1977;1978;1979;2027;2028;2029;2030;2031;2032;2074;2075;2076;2077;2078;2079;2080;4344;4345;4346;4347;4348;4349;4350;5166;5167;5168;5169;5621;5622;5623;8514;8515;8516;8517;8518;8519;8520;8521;8522;9090;9091;9092;9093;9094;9095;9261;9262;9543;9544;9545;9546;9547;9548;11127;12034;12035;12036;12037;12038;12039;12040;12041;12042;12043;120…	1142;1143;1144;1145;1707;1708;1709;1710;1711;1712;1713;1714;1715;1716;1763;1764;1765;1766;1767;1799;1800;1801;1802;1803;3816;3817;3818;3819;3820;3821;3822;4560;4561;4562;4563;4564;4995;4996;4997;7590;7591;7592;7593;7594;7595;7596;7597;7598;7599;7600;8087;8088;8089;8090;8091;8092;8228;8229;8456;8457;8458;8459;8460;9857;10678;10679;10680;10681;10682;10683;10684;10685;10686;10687
P62301;P59224;P59223	P62301	17;2;2	17;2;2	17;2;2	40S ribosomal protein S13	Rps13	sp|P62301|RS13_MOUSE 40S ribosomal protein S13 OS=Mus musculus OX=10090 GN=Rps13 PE=1 SV=2	3	17	17	17	17	16	17	16	17	16	63.6	63.6	63.6	17.222	151	151;151;151	0	203.19	By MS/MS	By MS/MS	63.6	63.6	118050000000	53651000000	64400000000	13117000000	5961300000	7155600000	60098000000	36515000000	39	44	83				256	1450;1451;1488;1489;1490;1491;2142;2143;2521;2798;3434;3448;3591;3592;3796;4375;4641	True;True;True;True;True;True;True;True;True;True;True;True;True;True;True;True;True	1544;1545;1582;1583;1584;1585;2279;2280;2683;2978;3686;3700;3859;3860;4068;4675;4956	3754;3755;3756;3757;3758;3759;3760;3761;3762;3763;3764;3863;3864;3865;3866;3867;3868;3869;3870;3871;3872;3873;3874;3875;3876;3877;3878;5747;5748;5749;5750;5751;5752;5753;6840;6841;7625;7626;7627;7628;7629;7630;7631;7632;9509;9510;9549;9550;9942;9943;9944;9945;9946;9947;9948;9949;9950;9951;9952;9953;9954;9955;10497;12066;12067;12068;12069;12717;12718	3277;3278;3279;3280;3281;3282;3283;3284;3285;3286;3287;3288;3289;3290;3291;3292;3293;3294;3387;3388;3389;3390;3391;3392;3393;3394;3395;3396;3397;3398;3399;3400;3401;3402;5111;5112;5113;5114;5115;5116;5117;5118;5119;5120;5121;5122;6088;6089;6090;6091;6092;6093;6814;6815;6816;6817;6818;6819;6820;8428;8461;8462;8463;8464;8801;8802;8803;8804;8805;8806;8807;8808;8809;8810;8811;8812;8813;8814;9282;1070…
P62305	P62305	2	2	2	Small nuclear ribonucleoprotein E	Snrpe	sp|P62305|RUXE_MOUSE Small nuclear ribonucleoprotein E OS=Mus musculus OX=10090 GN=Snrpe PE=1 SV=1	1	2	2	2	2	2	2	2	2	2	25	25	25	10.803	92	92	0	12.826	By matching	By MS/MS	25	25	33394000	7935800	25458000	8348400	1984000	6364400	7923000	17020000	0	2	2				257	1333;4404	True;True	1424;4708	3482;3483;12142;12143	3048;10773
P62315	P62315	2	2	2	Small nuclear ribonucleoprotein Sm D1	Snrpd1	sp|P62315|SMD1_MOUSE Small nuclear ribonucleoprotein Sm D1 OS=Mus musculus OX=10090 GN=Snrpd1 PE=1 SV=1	1	2	2	2	0	2	0	2	0	2	20.2	20.2	20.2	13.281	119	119	0	13.371		By MS/MS	0	20.2	233500000	0	233500000	58375000	0	58375000	0	155990000	0	3	3				258	2743;3117	True;True	2920;3351	7457;8634;8635	6676;7693;7694
P62317	P62317	4	4	4	Small nuclear ribonucleoprotein Sm D2	Snrpd2	sp|P62317|SMD2_MOUSE Small nuclear ribonucleoprotein Sm D2 OS=Mus musculus OX=10090 GN=Snrpd2 PE=1 SV=1	1	4	4	4	4	4	4	4	4	4	30.5	30.5	30.5	13.527	118	118	0	69.108	By MS/MS	By MS/MS	30.5	30.5	357240000	82479000	274760000	51034000	11783000	39252000	88246000	177790000	1	5	6				259	831;3093;3358;3630	True;True;True;True	891;3320;3605;3899	2204;2205;8553;8554;9265;9266;9267;10067;10068	1920;7624;8232;8233;8920;8921
P62320	P62320	2	2	2	Small nuclear ribonucleoprotein Sm D3	Snrpd3	sp|P62320|SMD3_MOUSE Small nuclear ribonucleoprotein Sm D3 OS=Mus musculus OX=10090 GN=Snrpd3 PE=1 SV=1	1	2	2	2	2	2	2	2	2	2	24.6	24.6	24.6	13.916	126	126	0	35.577	By MS/MS	By MS/MS	24.6	24.6	330670000	71786000	258880000	55111000	11964000	43147000	69460000	175270000	1	2	3				260	4154;4357	True;True	4445;4656	11472;11473;12020;12021	10171;10172;10667
P62334	P62334	2	2	2	26S protease regulatory subunit 10B	Psmc6	sp|P62334|PRS10_MOUSE 26S proteasome regulatory subunit 10B OS=Mus musculus OX=10090 GN=Psmc6 PE=1 SV=1	1	2	2	2	1	2	1	2	1	2	7.5	7.5	7.5	44.172	389	389	0	15.419	By matching	By MS/MS	3.6	7.5	22450000	2941500	19509000	1069100	140070	928980	0	13033000	0	1	1				261	283;1056	True;True	306;1125	767;768;2741	665;2381
P62702;P47836;Q93VH9;Q8VYK6;P49204	P62702;P47836	31;26;2;2;2	31;26;2;2;2	31;26;2;2;2	40S ribosomal protein S4, X isoform	Rps4x	sp|P62702|RS4X_MOUSE 40S ribosomal protein S4, X isoform OS=Mus musculus OX=10090 GN=Rps4x PE=1 SV=2;sp|P47836|RS4_CHICK 40S ribosomal protein S4 OS=Gallus gallus OX=9031 GN=RPS4 PE=2 SV=2	5	31	31	31	31	29	31	29	31	29	76.8	76.8	76.8	29.597	263	263;263;261;262;262	0	323.31	By MS/MS	By MS/MS	76.8	73	152770000000	77170000000	75604000000	9548400000	4823100000	4725300000	80333000000	43667000000	78	72	150				262	810;1009;1105;1430;1506;1703;1704;1740;1741;1852;2029;2161;2559;2560;2727;2747;2778;2779;2780;2781;2782;3851;3852;3941;4406;4407;4462;4463;4617;4618;4718	True;True;True;True;True;True;True;True;True;True;True;True;True;True;True;True;True;True;True;True;True;True;True;True;True;True;True;True;True;True;True	867;1077;1174;1175;1524;1604;1814;1815;1853;1854;1855;1856;1969;2160;2300;2722;2723;2904;2924;2955;2956;2957;2958;2959;4124;4125;4126;4127;4220;4710;4711;4768;4769;4770;4771;4932;4933;5041	2136;2137;2138;2139;2140;2141;2142;2143;2144;2145;2635;2636;2637;2638;2639;2640;2853;2854;2855;2856;2857;2858;2859;2860;3709;3710;3711;3712;3713;3714;3715;3716;3915;3916;3917;3918;4456;4457;4458;4459;4460;4461;4462;4463;4576;4577;4578;4579;4580;4581;4582;4583;4584;4585;4586;4587;4588;4589;4590;4591;4592;4890;4891;5431;5432;5433;5809;5810;6959;6960;6961;6962;6963;6964;7412;7413;7414;7415;7416;7417…	1857;1858;1859;1860;1861;1862;1863;1864;1865;1866;1867;2290;2291;2292;2293;2294;2295;2490;2491;2492;2493;2494;2495;2496;2497;2498;2499;2500;3238;3239;3240;3241;3242;3243;3429;3430;3431;3432;3433;3923;3924;3925;3926;3927;3928;3929;4027;4028;4029;4030;4031;4032;4033;4034;4035;4036;4037;4038;4039;4040;4041;4315;4316;4813;4814;5172;5173;6203;6204;6205;6206;6637;6638;6639;6640;6641;6642;6643;6644;6645…
P62717;Q8L7K0;P51418	P62717	20;1;1	20;1;1	20;1;1	60S ribosomal protein L18a	Rpl18a	sp|P62717|RL18A_MOUSE 60S ribosomal protein L18a OS=Mus musculus OX=10090 GN=Rpl18a PE=1 SV=1	3	20	20	20	20	17	20	17	20	17	60.8	60.8	60.8	20.732	176	176;178;178	0	323.31	By MS/MS	By MS/MS	60.8	54	77248000000	38119000000	39129000000	8583100000	4235400000	4347600000	36747000000	26778000000	47	39	86				263	188;189;487;658;659;1074;1258;1283;1284;1812;1813;2259;2260;2937;2996;3718;3719;3737;3738;4318	True;True;True;True;True;True;True;True;True;True;True;True;True;True;True;True;True;True;True;True	203;204;205;206;525;702;703;704;1143;1346;1372;1373;1929;1930;2405;2406;3148;3218;3990;3991;4009;4010;4616	502;503;504;505;506;507;508;509;510;511;512;513;514;515;516;517;518;1270;1271;1725;1726;1727;1728;1729;1730;1731;1732;1733;2778;2779;2780;2781;2782;2783;2784;2785;3283;3354;3355;3356;3357;3358;3359;3360;3361;3362;3363;4792;4793;4794;4795;4796;4797;4798;4799;6153;6154;6155;6156;6157;8093;8271;8272;8273;8274;8275;8276;8277;8278;10284;10285;10286;10287;10288;10289;10290;10291;10292;10342;10343;10344…	440;441;442;443;444;445;446;447;448;449;450;451;452;1102;1103;1491;1492;1493;1494;1495;1496;1497;1498;1499;1500;1501;2412;2413;2414;2415;2416;2417;2880;2941;2942;2943;2944;2945;2946;2947;2948;2949;2950;2951;2952;2953;2954;4235;4236;4237;4238;4239;4240;4241;4242;4243;4244;5471;5472;5473;5474;5475;7220;7374;7375;7376;7377;7378;7379;7380;7381;7382;7383;7384;7385;9105;9106;9107;9108;9109;9110;9111;91…
P62751	P62751	16	16	16	60S ribosomal protein L23a	Rpl23a	sp|P62751|RL23A_MOUSE 60S ribosomal protein L23a OS=Mus musculus OX=10090 GN=Rpl23a PE=1 SV=1	1	16	16	16	15	15	15	15	15	15	51.9	51.9	51.9	17.695	156	156	0	217.81	By MS/MS	By MS/MS	44.9	51.9	89042000000	36422000000	52621000000	14840000000	6070300000	8770100000	38820000000	31663000000	27	34	61				264	791;1215;1216;1788;2158;2211;2338;2383;2384;2863;2864;3030;3031;3413;4418;4419	True;True;True;True;True;True;True;True;True;True;True;True;True;True;True;True	847;1300;1301;1302;1904;2297;2353;2488;2536;2537;2538;3046;3047;3254;3255;3256;3664;4723;4724	2089;3175;3176;3177;3178;3179;3180;4714;4715;4716;4717;5790;5791;5792;5793;5794;5795;5796;5797;5798;5972;5973;5974;5975;6365;6366;6367;6368;6369;6370;6371;6504;6505;6506;6507;6508;6509;6510;6511;6512;7834;7835;7836;8386;8387;8388;8389;8390;8391;8392;8393;8394;8395;8396;8397;9444;9445;9446;9447;12184;12185;12186;12187;12188;12189;12190;12191;12192;12193;12194	1812;2779;2780;2781;2782;2783;2784;4163;4164;4165;4166;5152;5153;5154;5155;5156;5157;5158;5159;5160;5161;5162;5163;5308;5309;5310;5311;5654;5655;5656;5657;5658;5776;5777;5778;5779;5780;5781;5782;7001;7002;7482;7483;7484;7485;7486;7487;7488;7489;7490;8369;8370;8371;8372;10812;10813;10814;10815;10816;10817;10818;10819;10820;10821
P62754	P62754	19	19	19	40S ribosomal protein S6	Rps6	sp|P62754|RS6_MOUSE 40S ribosomal protein S6 OS=Mus musculus OX=10090 GN=Rps6 PE=1 SV=1	1	19	19	19	19	16	19	16	19	16	46.2	46.2	46.2	28.68	249	249	0	305.58	By MS/MS	By MS/MS	46.2	41.4	41904000000	26387000000	15517000000	5237900000	3298300000	1939600000	26535000000	8733800000	43	35	78				265	608;609;1324;1344;2007;2136;2195;2196;2441;2442;2513;2514;2655;2731;2879;2880;2910;3407;3408	True;True;True;True;True;True;True;True;True;True;True;True;True;True;True;True;True;True;True	652;653;1415;1435;2135;2136;2273;2335;2336;2598;2599;2674;2675;2824;2908;3063;3064;3065;3066;3106;3107;3656;3657;3658	1585;1586;1587;1588;1589;1590;1591;1592;1593;3463;3464;3465;3466;3467;3508;3509;3510;3511;5371;5372;5373;5732;5733;5734;5735;5736;5737;5911;5912;5913;5914;5915;5916;5917;5918;6638;6639;6640;6641;6642;6643;6818;6819;6820;6821;6822;6823;6824;7220;7221;7434;7879;7880;7881;7882;7883;7884;7885;7886;7887;7888;7889;7890;7891;7892;7893;7894;7895;7896;7897;7898;7899;7900;7901;7902;7903;7986;7987;7988;7989…	1375;1376;1377;1378;1379;1380;1381;1382;3033;3034;3035;3036;3037;3038;3070;3071;3072;3073;4763;4764;5096;5097;5098;5099;5100;5101;5261;5262;5263;5264;5265;5266;5267;5899;5900;5901;5902;5903;5904;6066;6067;6068;6069;6070;6071;6072;6478;6479;6659;7037;7038;7039;7040;7041;7042;7043;7044;7045;7046;7047;7048;7049;7050;7051;7052;7053;7054;7055;7056;7057;7058;7059;7060;7061;7062;7129;7130;7131;7132;7133…
P62806;P62805;P59259	P62806;P62805;P59259	8;8;7	8;8;7	8;8;7	Histone H4	Hist1h4a;HIST1H4A	sp|P62806|H4_MOUSE Histone H4 OS=Mus musculus OX=10090 GN=Hist1h4a PE=1 SV=2;sp|P62805|H4_HUMAN Histone H4 OS=Homo sapiens OX=9606 GN=HIST1H4A PE=1 SV=2;sp|P59259|H4_ARATH Histone H4 OS=Arabidopsis thaliana OX=3702 GN=At1g07660 PE=1 SV=2	3	8	8	8	4	8	4	8	4	8	50.5	50.5	50.5	11.367	103	103;103;103	0	66.235	By MS/MS	By MS/MS	32	50.5	2631500000	208700000	2422800000	438580000	34783000	403800000	270290000	1504100000	4	11	15				266	674;2008;2270;3387;4004;4105;4106;4226	True;True;True;True;True;True;True;True	726;2137;2416;3635;4285;4393;4394;4395;4396;4520	1790;1791;5374;6190;9361;11057;11347;11348;11349;11350;11351;11352;11353;11354;11355;11356;11682;11683	1554;1555;4765;5502;8307;9797;10058;10059;10060;10061;10062;10063;10064;10065;10066;10357;10358
P62814	P62814	3	3	2	V-type proton ATPase subunit B, brain isoform	Atp6v1b2	sp|P62814|VATB2_MOUSE V-type proton ATPase subunit B, brain isoform OS=Mus musculus OX=10090 GN=Atp6v1b2 PE=1 SV=1	1	3	3	2	3	3	3	3	2	2	8	8	5.3	56.55	511	511	0	24.359	By MS/MS	By MS/MS	8	8	71778000	22125000	49653000	2871100	885000	1986100	22631000	32665000	1	3	4				267	464;1977;3258	True;True;True	501;2105;3499	1216;1217;5302;5303;8981;8982	1054;4710;7996;7997
P62821	P62821	4	4	2	Ras-related protein Rab-1A	Rab1A	sp|P62821|RAB1A_MOUSE Ras-related protein Rab-1A OS=Mus musculus OX=10090 GN=Rab1A PE=1 SV=3	1	4	4	2	1	4	1	4	0	2	32.7	32.7	18	22.677	205	205	0	33.491	By MS/MS	By MS/MS	5.4	32.7	206830000	16207000	190620000	13788000	1080500	12708000	0	127340000	1	4	5				268	838;1079;1303;2608	True;True;True;True	899;1148;1392;2772	2218;2799;3402;7102;7103	1931;2431;2985;6374;6375
P62827;Q61820;Q8H156;P41917;P41916	P62827	8;3;2;2;2	8;3;2;2;2	8;3;2;2;2	GTP-binding nuclear protein Ran	Ran	sp|P62827|RAN_MOUSE GTP-binding nuclear protein Ran OS=Mus musculus OX=10090 GN=Ran PE=1 SV=3	5	8	8	8	7	8	7	8	7	8	38.9	38.9	38.9	24.423	216	216;216;221;221;221	0	60.58	By MS/MS	By MS/MS	30.6	38.9	702320000	144550000	557770000	63847000	13141000	50707000	165750000	351420000	3	8	11				269	34;1209;1684;1685;2827;3066;3675;4766	True;True;True;True;True;True;True;True	36;1294;1791;1792;3008;3291;3945;5091	74;75;3157;3158;4376;4377;4378;4379;4380;4381;7745;7746;8490;8491;10170;10171;13009	61;62;2765;2766;3847;3848;3849;6923;7571;9008;11531
P62830;P49690	P62830	16;1	16;1	16;1	60S ribosomal protein L23	Rpl23	sp|P62830|RL23_MOUSE 60S ribosomal protein L23 OS=Mus musculus OX=10090 GN=Rpl23 PE=1 SV=1	2	16	16	16	15	15	15	15	15	15	67.9	67.9	67.9	14.865	140	140;140	0	212.61	By MS/MS	By MS/MS	67.9	66.4	73385000000	31561000000	41824000000	8153900000	3506800000	4647100000	33146000000	22892000000	36	46	82				270	584;585;804;1227;1550;1553;1554;2011;2177;2280;2662;2663;2669;2670;3388;4269	True;True;True;True;True;True;True;True;True;True;True;True;True;True;True;True	626;627;628;861;1314;1650;1653;1654;2140;2317;2426;2831;2832;2833;2834;2835;2836;2842;2843;2844;2845;2846;2847;3636;4564	1526;1527;1528;1529;1530;1531;2118;2119;3208;3209;4030;4034;4035;4036;4037;5379;5380;5381;5382;5383;5862;5863;5864;5865;6214;6215;7233;7234;7235;7236;7237;7238;7239;7240;7241;7242;7243;7244;7245;7246;7247;7248;7249;7250;7251;7252;7253;7254;7255;7256;7257;7267;7268;7269;7270;7271;7272;7273;7274;7275;7276;7277;7278;7279;7280;7281;7282;7283;7284;7285;7286;7287;7288;7289;7290;7291;7292;7293;7294;7295…	1325;1326;1327;1328;1329;1836;1837;1838;1839;1840;1841;2813;2814;3524;3528;3529;3530;4769;4770;4771;4772;4773;5218;5219;5523;5524;6489;6490;6491;6492;6493;6494;6495;6496;6497;6498;6499;6500;6501;6502;6503;6504;6505;6506;6507;6508;6509;6517;6518;6519;6520;6521;6522;6523;6524;6525;6526;6527;6528;6529;6530;6531;6532;6533;6534;6535;6536;6537;6538;6539;6540;6541;6542;6543;6544;6545;6546;8308;8309;8310…
Q99JI6;P62835	Q99JI6;P62835	2;2	2;2	2;2	Ras-related protein Rap-1b;Ras-related protein Rap-1A	Rap1b;Rap1a	sp|Q99JI6|RAP1B_MOUSE Ras-related protein Rap-1b OS=Mus musculus OX=10090 GN=Rap1b PE=1 SV=2;sp|P62835|RAP1A_MOUSE Ras-related protein Rap-1A OS=Mus musculus OX=10090 GN=Rap1a PE=1 SV=1	2	2	2	2	2	2	2	2	2	2	13.6	13.6	13.6	20.825	184	184;184	0	12.537	By matching	By MS/MS	13.6	13.6	52841000	6712400	46129000	5284100	671240	4612900	8102900	29426000	0	2	2				271	2850;3594	True;True	3033;3862	7800;7801;9958;9959	6969;8817
P62843;P20342	P62843	6;2	6;2	6;2	40S ribosomal protein S15	Rps15	sp|P62843|RS15_MOUSE 40S ribosomal protein S15 OS=Mus musculus OX=10090 GN=Rps15 PE=1 SV=2	3	6	6	6	4	6	4	6	4	6	64.8	64.8	64.8	17.04	145	145;145;145	0	128.56	By MS/MS	By MS/MS	40.7	64.8	8996400000	1796100000	7200300000	1285200000	256580000	1028600000	1228100000	4287000000	10	26	36				272	668;793;1591;1655;2105;3886	True;True;True;True;True;True	716;717;718;849;850;1692;1758;2239;2240;4162;4163	1758;1759;1760;1761;1762;1763;1764;1765;1766;1767;1768;1769;1770;2092;2093;2094;2095;2096;2097;4125;4267;5641;5642;5643;5644;5645;5646;5647;5648;5649;10742;10743;10744;10745;10746;10747;10748;10749	1520;1521;1522;1523;1524;1525;1526;1527;1528;1529;1530;1815;1816;1817;1818;1819;1820;3607;3733;5013;5014;5015;5016;5017;5018;5019;5020;9491;9492;9493;9494;9495;9496;9497;9498;9499;9500
P62849	P62849	7	7	7	40S ribosomal protein S24	Rps24	sp|P62849|RS24_MOUSE 40S ribosomal protein S24 OS=Mus musculus OX=10090 GN=Rps24 PE=1 SV=1	1	7	7	7	7	7	7	7	7	7	36.1	36.1	36.1	15.423	133	133	0	62.756	By MS/MS	By MS/MS	36.1	36.1	22763000000	6984700000	15779000000	3793900000	1164100000	2629800000	6166300000	7799200000	18	30	48				273	2242;2923;2983;3288;4067;4068;4074	True;True;True;True;True;True;True	2385;2386;3126;3127;3203;3529;3530;4350;4351;4352;4353;4360	6071;6072;6073;6074;6075;6076;6077;6078;8037;8038;8039;8040;8041;8042;8043;8044;8045;8046;8047;8048;8049;8232;8233;9054;9055;9056;9057;9058;9059;9060;9061;11217;11218;11219;11220;11221;11222;11223;11224;11225;11226;11227;11228;11229;11230;11231;11232;11233;11234;11235;11236;11237;11262;11263;11264;11265	5396;5397;5398;5399;5400;5401;5402;5403;7172;7173;7174;7175;7176;7177;7178;7179;7335;7336;8057;8058;8059;8060;8061;8062;9933;9934;9935;9936;9937;9938;9939;9940;9941;9942;9943;9944;9945;9946;9947;9948;9949;9950;9951;9952;9953;9954;9955;9977;9978;9979;9980;9981
P62852	P62852	11	11	11	40S ribosomal protein S25	Rps25	sp|P62852|RS25_MOUSE 40S ribosomal protein S25 OS=Mus musculus OX=10090 GN=Rps25 PE=1 SV=1	1	11	11	11	11	9	11	9	11	9	44	44	44	13.742	125	125	0	206.93	By MS/MS	By MS/MS	44	36.8	81019000000	33039000000	47979000000	16204000000	6607900000	9595900000	50724000000	14332000000	19	17	36				274	28;362;619;620;1060;1721;2535;2658;2659;2660;4456	True;True;True;True;True;True;True;True;True;True;True	28;395;663;664;1129;1834;2697;2827;2828;2829;4761	53;54;55;56;987;988;1619;1620;1621;1622;1623;1624;1625;1626;1627;1628;1629;1630;1631;2750;4523;4524;4525;4526;6867;6868;6869;6870;6871;6872;7224;7225;7226;7227;7228;7229;7230;7231;12272;12273;12274;12275;12276;12277;12278	46;47;48;857;858;1407;1408;1409;1410;1411;1412;1413;1414;1415;1416;2389;3982;3983;3984;6116;6117;6118;6119;6120;6121;6122;6123;6482;6483;6484;6485;6486;6487;10890;10891;10892;10893;10894;10895
P62855	P62855	6	6	6	40S ribosomal protein S26	Rps26	sp|P62855|RS26_MOUSE 40S ribosomal protein S26 OS=Mus musculus OX=10090 GN=Rps26 PE=1 SV=3	1	6	6	6	4	6	4	6	4	6	45.2	45.2	45.2	13.015	115	115	0	48.628	By MS/MS	By MS/MS	37.4	45.2	22500000000	4747300000	17753000000	4500100000	949470000	3550600000	8202000000	8329300000	6	12	18				275	612;1228;1409;2502;3024;3025	True;True;True;True;True;True	656;1315;1503;2663;3248;3249	1598;1599;1600;1601;1602;1603;1604;3210;3211;3667;3668;6786;6787;6788;6789;6790;6791;8376;8377;8378	1387;1388;1389;1390;1391;1392;1393;1394;1395;2815;3208;6028;6029;6030;6031;6032;6033;7475;7476;7477
P62858;P34789	P62858;P34789	3;2	3;2	3;2	40S ribosomal protein S28;40S ribosomal protein S28-2	Rps28;RPS28C	sp|P62858|RS28_MOUSE 40S ribosomal protein S28 OS=Mus musculus OX=10090 GN=Rps28 PE=1 SV=1;sp|P34789|RS282_ARATH 40S ribosomal protein S28-2 OS=Arabidopsis thaliana OX=3702 GN=RPS28C PE=3 SV=1	2	3	3	3	3	2	3	2	3	2	36.2	36.2	36.2	7.8409	69	69;64	0	27.312	By MS/MS	By MS/MS	36.2	30.4	738870000	525630000	213240000	246290000	175210000	71081000	524640000	143440000	4	2	6				276	852;1534;4198	True;True;True	913;1633;4491	2239;2240;2241;2242;3986;11605;11606	1950;1951;1952;3490;10288;10289
P62862	P62862	3	3	3	40S ribosomal protein S30	Fau	sp|P62862|RS30_MOUSE 40S ribosomal protein S30 OS=Mus musculus OX=10090 GN=Fau PE=1 SV=1	2	3	3	3	3	2	3	2	3	2	20.3	20.3	20.3	6.6478	59	59;59	0	20.195	By MS/MS	By MS/MS	20.3	18.6	2248600000	1424700000	823900000	1124300000	712370000	411950000	1570300000	404810000	5	2	7				277	1277;1278;3370	True;True;True	1366;1367;3617	3336;3337;3338;3339;3340;3341;9306;9307	2927;2928;2929;2930;2931;8263;8264
P62889;Q9LSA3;Q9C8F7;Q8VZ19	P62889	9;1;1;1	9;1;1;1	9;1;1;1	60S ribosomal protein L30	Rpl30	sp|P62889|RL30_MOUSE 60S ribosomal protein L30 OS=Mus musculus OX=10090 GN=Rpl30 PE=1 SV=2	4	9	9	9	9	9	9	9	9	9	67.8	67.8	67.8	12.784	115	115;112;112;112	0	193.99	By MS/MS	By MS/MS	67.8	67.8	59031000000	28409000000	30622000000	9838500000	4734800000	5103700000	28519000000	18548000000	21	20	41				278	229;2253;2818;2819;3500;3535;3617;3912;4171	True;True;True;True;True;True;True;True;True	250;2398;2399;2999;3000;3759;3760;3799;3886;4190;4462	633;634;6134;6135;6136;6137;6138;6139;6140;6141;7716;7717;7718;7719;7720;7721;7722;7723;7724;7725;7726;7727;9705;9706;9707;9708;9801;9802;10037;10038;10809;10810;10811;10812;10813;10814;11523;11524;11525;11526;11527;11528;11529;11530;11531;11532;11533	559;560;5453;5454;5455;5456;5457;5458;5459;5460;6895;6896;6897;6898;6899;6900;6901;6902;6903;6904;6905;6906;6907;6908;6909;6910;6911;8605;8606;8607;8687;8893;9564;9565;9566;9567;9568;9569;10218;10219;10220;10221;10222;10223;10224;10225;10226;10227
P62892	P62892	2	2	2	60S ribosomal protein L39	Rpl39	sp|P62892|RL39_MOUSE 60S ribosomal protein L39 OS=Mus musculus OX=10090 GN=Rpl39 PE=1 SV=2	1	2	2	2	2	2	2	2	2	2	23.5	23.5	23.5	6.4066	51	51	0	32.191	By MS/MS	By MS/MS	23.5	23.5	1316800000	814200000	502630000	1316800000	814200000	502630000	834170000	315820000	3	2	5				279	3259;3293	True;True	3500;3535	8983;8984;9073;9074;9075;9076	7998;8073;8074;8075;8076
P62897;CON__P62894;Q9T0G2;O23138	P62897	3;1;1;1	3;1;1;1	3;1;1;1	Cytochrome c, somatic	Cycs	sp|P62897|CYC_MOUSE Cytochrome c, somatic OS=Mus musculus OX=10090 GN=Cycs PE=1 SV=2	5	3	3	3	2	3	2	3	2	3	31.4	31.4	31.4	11.605	105	105;105;105;112;114	0	20.537	By MS/MS	By MS/MS	18.1	31.4	65798000	4235400	61563000	10966000	705900	10260000	0	41127000	1	2	3				280	86;3902;3903	True;True;True	90;4180;4181	204;205;10782;10783;10784	177;9524;9525;9526
P62900	P62900	14	14	14	60S ribosomal protein L31	Rpl31	sp|P62900|RL31_MOUSE 60S ribosomal protein L31 OS=Mus musculus OX=10090 GN=Rpl31 PE=1 SV=1	1	14	14	14	13	14	13	14	13	14	58.4	58.4	58.4	14.463	125	125	0	159.46	By MS/MS	By MS/MS	58.4	58.4	59893000000	27496000000	32397000000	8556100000	3928000000	4628100000	30563000000	18272000000	19	22	41				281	974;1076;1077;1086;1858;1859;2117;2876;2985;3065;3382;3383;3411;3460	True;True;True;True;True;True;True;True;True;True;True;True;True;True	1038;1039;1145;1146;1155;1975;1976;2253;3060;3205;3290;3629;3630;3662;3714	2563;2564;2565;2566;2787;2788;2789;2790;2791;2792;2811;2812;2813;2814;4908;4909;4910;4911;5679;5680;5681;7864;7865;7866;7867;7868;7869;7870;7871;7872;7873;7874;7875;8237;8238;8239;8487;8488;8489;9346;9347;9348;9436;9437;9438;9439;9440;9441;9598;9599	2228;2229;2230;2231;2419;2420;2421;2422;2423;2443;2444;2445;2446;4329;4330;4331;4332;5049;5050;7022;7023;7024;7025;7026;7027;7028;7029;7030;7031;7032;7033;7340;7341;7342;7568;7569;7570;8294;8295;8365;8366;8367;8516;8517
P62908;Q9M339;Q9SIP7	P62908	28;7;7	28;7;7	21;0;0	40S ribosomal protein S3	Rps3	sp|P62908|RS3_MOUSE 40S ribosomal protein S3 OS=Mus musculus OX=10090 GN=Rps3 PE=1 SV=1	3	28	28	21	28	25	28	25	21	18	77.4	77.4	59.7	26.674	243	243;249;250	0	323.31	By MS/MS	By MS/MS	77.4	76.5	155200000000	77624000000	77576000000	8168400000	4085500000	4083000000	76841000000	48629000000	62	67	129				282	59;111;548;912;966;1133;1134;1153;1260;1261;1262;1389;1452;1956;1998;1999;2130;2131;2226;2227;2594;2595;3343;3364;3867;4315;4499;4685	True;True;True;True;True;True;True;True;True;True;True;True;True;True;True;True;True;True;True;True;True;True;True;True;True;True;True;True	61;121;588;975;1030;1203;1204;1226;1227;1348;1349;1350;1351;1481;1482;1546;2078;2079;2126;2127;2266;2267;2369;2370;2758;2759;3587;3611;4142;4613;4809;5003	132;133;302;303;1421;1422;1423;1424;1425;1426;2395;2396;2397;2398;2399;2400;2401;2402;2540;2541;2542;2543;2923;2924;2925;2926;2927;2928;2929;2930;2974;2975;2976;2977;3286;3287;3288;3289;3290;3291;3292;3293;3294;3295;3296;3297;3298;3299;3300;3301;3302;3303;3304;3305;3306;3307;3609;3610;3611;3612;3765;3766;3767;3768;5225;5226;5227;5228;5229;5230;5350;5351;5352;5353;5354;5355;5356;5357;5713;5714;571…	117;118;259;260;261;262;1234;1235;1236;1237;1238;1239;2083;2084;2085;2086;2087;2088;2089;2090;2212;2213;2214;2565;2566;2567;2568;2569;2570;2571;2572;2607;2608;2609;2610;2882;2883;2884;2885;2886;2887;2888;2889;2890;2891;2892;2893;2894;2895;2896;2897;2898;2899;2900;2901;2902;2903;2904;2905;3152;3153;3154;3155;3295;3296;3297;3298;3299;4627;4628;4629;4630;4631;4632;4633;4747;4748;4749;4750;4751;4752;…
P62911;P17932	P62911	16;3	16;3	16;3	60S ribosomal protein L32	Rpl32	sp|P62911|RL32_MOUSE 60S ribosomal protein L32 OS=Mus musculus OX=10090 GN=Rpl32 PE=1 SV=2	2	16	16	16	16	16	16	16	16	16	55.6	55.6	55.6	15.86	135	135;135	0	246.33	By MS/MS	By MS/MS	55.6	55.6	73697000000	35469000000	38228000000	10528000000	5067000000	5461100000	34429000000	22781000000	38	36	74				283	29;30;35;929;1163;1164;1197;1198;1542;1543;1693;1694;2126;3809;3950;3951	True;True;True;True;True;True;True;True;True;True;True;True;True;True;True;True	29;30;31;32;37;992;993;1237;1238;1239;1240;1279;1280;1281;1641;1642;1643;1800;1801;1802;1803;2262;4081;4229;4230;4231	57;58;59;60;61;62;63;64;65;66;76;77;2439;2440;2441;2442;2443;2444;2445;2446;2447;2448;2449;2999;3000;3001;3002;3003;3004;3005;3006;3007;3008;3009;3010;3011;3012;3013;3014;3015;3016;3017;3105;3106;3107;3108;3109;3110;3111;4001;4002;4003;4004;4005;4006;4007;4008;4009;4010;4011;4012;4013;4014;4408;4409;4410;4411;4412;4413;4414;4415;4416;4417;4418;4419;5705;5706;10519;10520;10521;10522;10910;10911;10…	49;50;51;52;53;54;55;56;63;64;2124;2125;2126;2127;2128;2129;2130;2131;2132;2133;2134;2135;2136;2628;2629;2630;2631;2632;2633;2634;2635;2636;2637;2638;2639;2640;2641;2642;2643;2644;2645;2646;2725;2726;2727;2728;2729;3503;3504;3505;3506;3507;3508;3509;3510;3511;3512;3513;3880;3881;3882;3883;3884;3885;3886;3887;3888;3889;3890;3891;5070;5071;9300;9301;9302;9662;9663;9664;9665;9666;9667
P62918;Q42064;P46286;Q4PSL7	P62918	23;2;1;1	23;2;1;1	23;2;1;1	60S ribosomal protein L8	Rpl8	sp|P62918|RL8_MOUSE 60S ribosomal protein L8 OS=Mus musculus OX=10090 GN=Rpl8 PE=1 SV=2	4	23	23	23	23	22	23	22	23	22	65	65	65	28.024	257	257;258;258;260	0	323.31	By MS/MS	By MS/MS	65	62.6	93687000000	56695000000	36991000000	9368700000	5669500000	3699100000	55335000000	25633000000	46	42	88				284	355;356;372;373;434;461;462;600;1439;1440;1587;1780;2087;2246;2279;2726;3436;3437;3870;3871;4247;4317;4523	True;True;True;True;True;True;True;True;True;True;True;True;True;True;True;True;True;True;True;True;True;True;True	386;387;388;389;405;406;468;498;499;644;1533;1534;1687;1688;1896;2220;2221;2390;2425;2903;3688;3689;4145;4146;4541;4615;4833	957;958;959;960;961;962;963;964;965;966;967;968;1009;1010;1011;1012;1013;1014;1015;1016;1130;1131;1208;1209;1210;1211;1212;1213;1568;1569;3733;3734;3735;3736;3737;3738;4109;4110;4111;4112;4113;4114;4115;4116;4117;4118;4695;4696;5593;5594;5595;5596;5597;6090;6091;6092;6093;6094;6095;6212;6213;7408;7409;7410;7411;9514;9515;9516;9517;9518;9519;9520;9521;9522;9523;10688;10689;10690;10691;10692;10693;…	828;829;830;831;832;833;834;835;836;837;838;839;840;878;879;880;881;882;883;884;976;1045;1046;1047;1048;1049;1050;1051;1362;1363;3257;3258;3259;3260;3261;3262;3595;3596;3597;3598;3599;3600;3601;4145;4146;4968;4969;4970;4971;4972;4973;5414;5415;5416;5521;5522;6635;6636;8431;8432;8433;8434;8435;8436;8437;8438;8439;9445;9446;9447;9448;9449;9450;9451;9452;9453;9454;9455;9456;9457;9458;9459;9460;10398…
P62960;Q9Z2C8	P62960	17;4	17;4	11;0	Nuclease-sensitive element-binding protein 1	Ybx1	sp|P62960|YBOX1_MOUSE Nuclease-sensitive element-binding protein 1 OS=Mus musculus OX=10090 GN=Ybx1 PE=1 SV=3	2	17	17	11	17	17	17	17	11	11	68.6	68.6	61.2	35.73	322	322;360	0	323.31	By MS/MS	By MS/MS	68.6	68.6	15237000000	7578300000	7658500000	1172100000	582940000	589110000	7282800000	4854000000	34	32	66				285	8;813;814;829;830;1217;1299;2981;2982;3006;3160;3368;3425;3728;3729;3779;3781	True;True;True;True;True;True;True;True;True;True;True;True;True;True;True;True;True	8;871;872;889;890;1303;1388;3201;3202;3229;3396;3615;3676;3677;4000;4001;4051;4053	10;11;12;13;2156;2157;2158;2159;2160;2161;2198;2199;2200;2201;2202;2203;3181;3182;3391;3392;3393;3394;8220;8221;8222;8223;8224;8225;8226;8227;8228;8229;8230;8231;8302;8303;8735;8736;8737;8738;9300;9301;9477;9478;9479;9480;9481;9482;9483;9484;10313;10314;10315;10316;10317;10318;10319;10320;10321;10322;10449;10450;10451;10452;10453;10454;10455;10460;10461;10462;10463;10464;10465;10466;10467;10468;1…	9;10;11;1876;1877;1878;1879;1880;1881;1914;1915;1916;1917;1918;1919;2785;2976;2977;2978;2979;7325;7326;7327;7328;7329;7330;7331;7332;7333;7334;7403;7404;7772;7773;7774;7775;8257;8258;8398;8399;8400;8401;8402;8403;8404;8405;9129;9130;9131;9132;9133;9134;9135;9136;9243;9244;9245;9246;9247;9248;9253;9254;9255;9256;9257;9258;9259;9260
P62962;CON__P02584	P62962	5;2	5;2	5;2	Profilin-1	Pfn1	sp|P62962|PROF1_MOUSE Profilin-1 OS=Mus musculus OX=10090 GN=Pfn1 PE=1 SV=2	2	5	5	5	2	5	2	5	2	5	51.4	51.4	51.4	14.957	140	140;140	0	38.786	By MS/MS	By MS/MS	21.4	51.4	153200000	8928100	144270000	17023000	992020	16031000	14411000	90901000	1	4	5				286	704;865;3733;3763;3893	True;True;True;True;True	757;926;4005;4035;4171	1865;2264;10329;10330;10420;10763;10764	1622;1971;9140;9141;9222;9509
P62983;P62984;P0CG49;P0CG50;Q42202;B9DHA6;Q8RUC6;Q9SHE7;P59271;P59233;P59232;P0CH33;Q3E7K8;Q3E7T8;Q1EC66;Q9FHQ6;P0CH32;Q8H159;Q39256	P62983;P62984;P0CG49;P0CG50	10;6;6;6;2;2;2;2;2;2;2;2;2;2;2;2;2;2;1	10;6;6;6;2;2;2;2;2;2;2;2;2;2;2;2;2;2;1	10;6;6;6;2;2;2;2;2;2;2;2;2;2;2;2;2;2;1	Ubiquitin-40S ribosomal protein S27a;Ubiquitin;40S ribosomal protein S27a;Ubiquitin-60S ribosomal protein L40;Ubiquitin;60S ribosomal protein L40;Polyubiquitin-B;Ubiquitin;Polyubiquitin-C;Ubiquitin;Ubiquitin-related 1;Ubiquitin-related 2	Rps27a;Uba52;Ubb;Ubc	sp|P62983|RS27A_MOUSE Ubiquitin-40S ribosomal protein S27a OS=Mus musculus OX=10090 GN=Rps27a PE=1 SV=2;sp|P62984|RL40_MOUSE Ubiquitin-60S ribosomal protein L40 OS=Mus musculus OX=10090 GN=Uba52 PE=1 SV=2;sp|P0CG49|UBB_MOUSE Polyubiquitin-B OS=Mus musculus	19	10	10	10	10	8	10	8	10	8	60.3	60.3	60.3	17.951	156	156;128;305;734;128;128;154;156;156;157;157;229;230;305;306;322;382;457;631	0	202.03	By MS/MS	By MS/MS	60.3	51.3	11896000000	4730900000	7165400000	1982700000	788480000	1194200000	5022700000	4334200000	17	14	31				287	478;811;1022;1983;3357;3942;3943;3990;3991;4776	True;True;True;True;True;True;True;True;True;True	516;868;869;1091;2111;3604;4221;4222;4271;4272;5101	1243;1244;1245;1246;2146;2147;2148;2149;2150;2151;2152;2153;2678;2679;2680;2681;5318;5319;5320;5321;9263;9264;10894;10895;10896;10897;10898;11006;11007;11008;11009;11010;11011;13029	1075;1076;1077;1078;1868;1869;1870;1871;1872;1873;1874;2331;2332;2333;2334;4719;4720;4721;4722;4723;4724;8230;8231;9647;9648;9649;9650;9651;9736;9737;9738;9739;11554
P62996	P62996	4	4	4	Transformer-2 protein homolog beta	Tra2b	sp|P62996|TRA2B_MOUSE Transformer-2 protein homolog beta OS=Mus musculus OX=10090 GN=Tra2b PE=1 SV=1	1	4	4	4	2	4	2	4	2	4	18.8	18.8	18.8	33.665	288	288	0	30.753	By matching	By MS/MS	10.4	18.8	163140000	4774200	158360000	13595000	397850	13197000	5770400	104800000	0	5	5				288	315;1350;1351;4658	True;True;True;True	343;1441;1442;4975	859;860;3519;3520;3521;12750;12751	740;741;3081;3082;11301
P63017;P11142;P17156;Q9C7X7;Q61696;P34931;P16627;P17879;Q9S9N1;O65719;P22954;P0DMV9;P0DMV8	P63017;P11142	32;31;9;3;3;3;3;3;3;3;3;2;2	32;31;9;3;3;3;3;3;3;3;3;2;2	27;26;6;0;2;1;1;2;1;0;0;1;1	Heat shock cognate 71 kDa protein	Hspa8;HSPA8	sp|P63017|HSP7C_MOUSE Heat shock cognate 71 kDa protein OS=Mus musculus OX=10090 GN=Hspa8 PE=1 SV=1;sp|P11142|HSP7C_HUMAN Heat shock cognate 71 kDa protein OS=Homo sapiens OX=9606 GN=HSPA8 PE=1 SV=1	13	32	32	27	27	31	27	31	22	26	55.3	55.3	48.5	70.87	646	646;646;633;617;641;641;641;642;646;649;653;641;641	0	323.31	By MS/MS	By MS/MS	46.4	54.6	9393200000	2431100000	6962100000	284640000	73670000	210970000	2072600000	4861200000	28	42	70				289	365;499;524;676;875;1112;1519;1581;1742;1880;1881;2387;2619;2620;2905;2949;2950;3115;3116;3122;3322;3361;3517;3565;3593;3706;3756;4076;4108;4169;4201;4453	True;True;True;True;True;True;True;True;True;True;True;True;True;True;True;True;True;True;True;True;True;True;True;True;True;True;True;True;True;True;True;True	398;539;564;728;938;1182;1618;1681;1857;1998;1999;2541;2785;2786;3099;3166;3167;3168;3347;3348;3349;3350;3356;3565;3608;3777;3778;3832;3861;3978;4028;4362;4398;4460;4494;4758	993;994;995;996;1307;1308;1356;1357;1793;1794;2300;2301;2876;2877;3947;3948;4096;4097;4593;4594;4964;4965;4966;4967;4968;4969;4970;6516;6517;7135;7136;7137;7970;8135;8136;8137;8138;8139;8140;8141;8625;8626;8627;8628;8629;8630;8631;8632;8633;8645;9146;9147;9148;9273;9746;9747;9748;9749;9750;9751;9864;9865;9866;9867;9956;9957;10251;10252;10397;10398;10399;10400;11268;11269;11359;11360;11361;11362;1…	863;864;865;866;1135;1136;1177;1178;1557;1558;2001;2513;2514;3459;3460;3582;4042;4379;4380;4381;4382;4383;4384;5785;5786;6404;6405;6406;7110;7255;7256;7257;7258;7259;7685;7686;7687;7688;7689;7690;7691;7692;7703;8134;8135;8237;8641;8642;8643;8644;8741;8742;8743;8815;8816;9078;9079;9202;9203;9204;9205;9984;9985;10069;10070;10071;10072;10073;10216;10294;10295;10884;10885;10886
P63028;P43347	P63028	4;1	4;1	4;1	Translationally-controlled tumor protein	Tpt1	sp|P63028|TCTP_MOUSE Translationally-controlled tumor protein OS=Mus musculus OX=10090 GN=Tpt1 PE=1 SV=1	2	4	4	4	1	4	1	4	1	4	31.4	31.4	31.4	19.462	172	172;172	0	30.102	By MS/MS	By MS/MS	8.1	31.4	230280000	25231000	205050000	38381000	4205200	34175000	31272000	130950000	0	5	5				290	639;816;1997;4320	True;True;True;True	683;874;2125;4618	1674;1675;1676;1677;2163;5349;11929	1449;1450;1451;1883;4746;10578
P63037	P63037	2	2	2	DnaJ homolog subfamily A member 1	Dnaja1	sp|P63037|DNJA1_MOUSE DnaJ homolog subfamily A member 1 OS=Mus musculus OX=10090 GN=Dnaja1 PE=1 SV=1	1	2	2	2	2	1	2	1	2	1	6.5	6.5	6.5	44.868	397	397	0	13.335	By MS/MS	By matching	6.5	3.3	48147000	38513000	9633700	2292700	1834000	458750	38513000	0	2	0	2				291	3255;3944	True;True	3496;4223	8976;8977;10899	7992;9652
P63038;Q93ZM7	P63038	7;1	7;1	7;1	60 kDa heat shock protein, mitochondrial	Hspd1	sp|P63038|CH60_MOUSE 60 kDa heat shock protein, mitochondrial OS=Mus musculus OX=10090 GN=Hspd1 PE=1 SV=1	2	7	7	7	7	7	7	7	7	7	18	18	18	60.955	573	573;572	0	58.096	By MS/MS	By MS/MS	18	18	260860000	126570000	134290000	7904800	3835300	4069400	124800000	91486000	3	8	11				292	42;2013;2835;2961;3980;4249;4488	True;True;True;True;True;True;True	44;2142;3016;3180;4260;4543;4796	91;92;93;94;5391;5392;7762;7763;8171;8172;10980;10981;11732;11733;12354;12355	77;78;4782;4783;6935;6936;7283;9716;10401;10402;10956
P63073	P63073	2	2	2	Eukaryotic translation initiation factor 4E	Eif4e	sp|P63073|IF4E_MOUSE Eukaryotic translation initiation factor 4E OS=Mus musculus OX=10090 GN=Eif4e PE=1 SV=1	1	2	2	2	1	2	1	2	1	2	8.3	8.3	8.3	25.053	217	217	0	12.144	By matching	By MS/MS	3.2	8.3	30496000	4546400	25949000	2772300	413310	2359000	0	17336000	0	1	1				293	1753;4587	True;True	1869;4899	4624;12585;12586	4072;11161
P63087;P48485;P48482;P30366;P62141	P63087	3;1;1;1;1	3;1;1;1;1	2;1;1;1;1	Serine/threonine-protein phosphatase PP1-gamma catalytic subunit	Ppp1cc	sp|P63087|PP1G_MOUSE Serine/threonine-protein phosphatase PP1-gamma catalytic subunit OS=Mus musculus OX=10090 GN=Ppp1cc PE=1 SV=1	5	3	3	2	3	3	3	3	2	2	12.1	12.1	7.7	36.983	323	323;312;312;318;327	0	17.629	By MS/MS	By MS/MS	12.1	12.1	48243000	15899000	32344000	3015200	993680	2021500	16128000	21379000	1	2	3				294	76;1771;1912	True;True;True	79;1887;2033	186;187;4674;4675;5082;5083	162;4127;4493
P63101;P48349;P48348;O70456;Q9S9Z8;P48347;P42644;Q01525;Q96299;Q96300;P46077;P42643;Q9C5W6;P42645	P63101	8;1;1;1;1;1;1;1;1;1;1;1;1;1	8;1;1;1;1;1;1;1;1;1;1;1;1;1	6;0;0;0;0;0;0;0;0;0;0;0;0;0	14-3-3 protein zeta/delta	Ywhaz	sp|P63101|1433Z_MOUSE 14-3-3 protein zeta/delta OS=Mus musculus OX=10090 GN=Ywhaz PE=1 SV=1	14	8	8	6	5	8	5	8	4	6	43.3	43.3	35.5	27.771	245	245;248;248;248;252;254;255;259;263;265;267;267;268;268	0	101.32	By MS/MS	By MS/MS	26.1	43.3	460630000	102190000	358450000	32902000	7299000	25603000	121790000	212890000	5	11	16				295	595;707;975;1188;1438;3801;3822;4689	True;True;True;True;True;True;True;True	639;760;761;1040;1268;1532;4073;4095;5007	1551;1552;1553;1872;1873;1874;1875;2567;3078;3079;3729;3730;3731;3732;10507;10551;12819;12820	1345;1346;1347;1627;1628;1629;2232;2702;2703;3254;3255;3256;9289;9325;11362;11363
Q9WTX5;P63208	Q9WTX5;P63208	3;3	3;3	3;3	S-phase kinase-associated protein 1	Skp1;SKP1	sp|Q9WTX5|SKP1_MOUSE S-phase kinase-associated protein 1 OS=Mus musculus OX=10090 GN=Skp1 PE=1 SV=3;sp|P63208|SKP1_HUMAN S-phase kinase-associated protein 1 OS=Homo sapiens OX=9606 GN=SKP1 PE=1 SV=2	2	3	3	3	2	3	2	3	2	3	16	16	16	18.672	163	163;163	0	21.38	By matching	By MS/MS	8.6	16	47282000	9153800	38128000	4728200	915380	3812800	11861000	22764000	0	4	4				296	2979;3435;3848	True;True;True	3199;3687;4121	8217;9511;9512;9513;10613;10614	7323;8429;8430;9382
P63242;Q8BGY2	P63242	6;2	6;2	6;2	Eukaryotic translation initiation factor 5A-1	Eif5a	sp|P63242|IF5A1_MOUSE Eukaryotic translation initiation factor 5A-1 OS=Mus musculus OX=10090 GN=Eif5a PE=1 SV=2	2	6	6	6	2	6	2	6	2	6	50.6	50.6	50.6	16.832	154	154;153	0	79.548	By MS/MS	By MS/MS	8.4	50.6	433460000	28679000	404780000	54182000	3584900	50597000	38482000	260610000	2	7	9				297	63;820;821;2978;4266;4267	True;True;True;True;True;True	65;878;879;3198;4561;4562	139;2170;2171;2172;8216;11794;11795;11796;11797;11798;11799	124;1888;1889;1890;7322;10459;10460;10461;10462;10463
P63260	P63260	22	22	1	Actin, cytoplasmic 2;Actin, cytoplasmic 2, N-terminally processed	ACTG1;Actg1	sp|P63260|ACTG_MOUSE Actin, cytoplasmic 2 OS=Mus musculus OX=10090 GN=Actg1 PE=1 SV=1	3	22	22	1	19	20	19	20	1	1	73.1	73.1	4.5	41.792	375	375;375;375	0	323.31	By MS/MS	By MS/MS	60.8	70.4	19233000000	10434000000	8799600000	961660000	521680000	439980000	8888000000	6802100000	31	35	66				298	155;441;442;502;657;663;832;897;906;1624;1625;1716;1865;1866;2061;2374;2388;3227;3811;4070;4150;4719	True;True;True;True;True;True;True;True;True;True;True;True;True;True;True;True;True;True;True;True;True;True	166;477;478;542;701;708;709;892;893;960;969;1726;1727;1828;1829;1983;1984;2193;2526;2527;2542;3466;4084;4355;4356;4441;5042	408;409;1159;1160;1161;1162;1163;1164;1312;1313;1723;1724;1740;1741;1742;1743;1744;1745;1746;2206;2207;2208;2359;2360;2383;4190;4191;4192;4193;4509;4510;4511;4512;4924;4925;4926;4927;5528;5529;5530;5531;6478;6479;6480;6481;6482;6483;6484;6485;6518;8896;8897;10526;10527;10528;10529;10530;10531;10532;10533;11240;11241;11242;11243;11244;11245;11246;11247;11465;11466;11467;11468;12900	354;355;1003;1004;1005;1006;1007;1008;1139;1140;1490;1506;1507;1508;1509;1510;1511;1512;1921;1922;2052;2053;2072;3663;3664;3665;3666;3972;3973;3974;3975;4345;4346;4347;4348;4907;4908;4909;5756;5757;5758;5759;5760;5761;5762;5787;7918;7919;9305;9306;9307;9308;9309;9310;9957;9958;9959;9960;9961;9962;9963;10164;10165;10166;10167;11435
P63276	P63276	15	15	15	40S ribosomal protein S17	Rps17	sp|P63276|RS17_MOUSE 40S ribosomal protein S17 OS=Mus musculus OX=10090 GN=Rps17 PE=1 SV=2	1	15	15	15	14	14	14	14	14	14	68.9	68.9	68.9	15.524	135	135	0	223.91	By MS/MS	By MS/MS	68.9	68.1	37631000000	11702000000	25929000000	7526200000	2340400000	5185800000	8702600000	16908000000	31	47	78				299	680;681;1749;1750;2477;2478;2574;3029;3354;3355;3442;3443;4166;4167;4285	True;True;True;True;True;True;True;True;True;True;True;True;True;True;True	732;733;734;1864;1865;1866;2636;2637;2737;2738;3253;3600;3601;3602;3694;3695;4457;4458;4581	1801;1802;1803;1804;1805;1806;1807;1808;1809;1810;1811;1812;1813;1814;1815;1816;1817;1818;1819;1820;1821;1822;4608;4609;4610;4611;4612;4613;4614;4615;4616;4617;4618;6727;6728;6729;6730;6731;6997;6998;6999;7000;7001;7002;7003;7004;7005;8384;8385;9237;9238;9239;9240;9241;9242;9243;9244;9245;9246;9247;9248;9249;9250;9251;9252;9253;9254;9255;9256;9257;9258;9259;9260;9536;9537;9538;9539;11511;11512;11…	1564;1565;1566;1567;1568;1569;1570;1571;1572;1573;1574;1575;1576;1577;1578;1579;1580;1581;1582;1583;1584;1585;1586;4053;4054;4055;4056;4057;4058;4059;4060;4061;4062;4063;4064;4065;5981;5982;5983;6236;6237;6238;6239;6240;6241;6242;6243;6244;6245;7481;8209;8210;8211;8212;8213;8214;8215;8216;8217;8218;8219;8220;8221;8222;8223;8224;8225;8226;8227;8450;8451;8452;10208;10209;10210;10211;10212;10213;102…
P63323	P63323	13	13	13	40S ribosomal protein S12	Rps12	sp|P63323|RS12_MOUSE 40S ribosomal protein S12 OS=Mus musculus OX=10090 GN=Rps12 PE=1 SV=2	1	13	13	13	13	13	13	13	13	13	68.9	68.9	68.9	14.525	132	132	0	323.31	By MS/MS	By MS/MS	68.9	68.9	37770000000	16016000000	21754000000	5395700000	2288100000	3107700000	16418000000	12901000000	20	28	48				300	102;732;754;1020;2197;2296;2297;2462;2463;3201;3826;4524;4525	True;True;True;True;True;True;True;True;True;True;True;True;True	109;110;786;808;1089;2337;2442;2443;2620;2621;3438;3439;4099;4834;4835	262;263;264;265;266;267;268;269;270;271;272;1931;1932;1933;1934;1935;1936;1994;1995;1996;2672;2673;2674;2675;5919;5920;6249;6250;6251;6252;6253;6254;6698;6699;6700;6701;8829;8830;8831;8832;8833;8834;8835;8836;8837;10562;10563;10564;10565;10566;10567;12433;12434;12435;12436	220;221;222;223;224;225;226;227;228;229;230;231;232;233;1676;1677;1678;1679;1680;1728;1729;2325;2326;2327;2328;5268;5269;5553;5554;5555;5556;5557;5957;5958;5959;5960;5961;7858;7859;7860;7861;7862;7863;7864;7865;7866;9332;9333;9334;9335;9336;9337;11021;11022
P63325	P63325	10	10	10	40S ribosomal protein S10	Rps10	sp|P63325|RS10_MOUSE 40S ribosomal protein S10 OS=Mus musculus OX=10090 GN=Rps10 PE=1 SV=1	1	10	10	10	10	10	10	10	10	10	54.5	54.5	54.5	18.916	165	165	0	237.15	By MS/MS	By MS/MS	54.5	54.5	49441000000	12059000000	37382000000	6180100000	1507400000	4672700000	16655000000	19431000000	39	52	91				301	98;760;761;1629;1647;1700;1754;2076;3145;3468	True;True;True;True;True;True;True;True;True;True	104;814;815;1731;1750;1810;1811;1870;2208;3379;3722	244;245;246;247;2005;2006;2007;2008;2009;2010;2011;2012;2013;2014;2015;2016;2017;2018;2019;2020;2021;2022;2023;2024;2025;2026;4199;4200;4238;4239;4240;4241;4242;4243;4244;4245;4246;4247;4248;4439;4440;4441;4442;4443;4444;4445;4446;4447;4448;4449;4450;4625;4626;4627;4628;4629;4630;4631;4632;4633;4634;4635;4636;4637;4638;5559;5560;5561;5562;8687;8688;8689;8690;9613;9614;9615;9616;9617	206;207;208;209;210;1736;1737;1738;1739;1740;1741;1742;1743;1744;1745;1746;1747;1748;1749;1750;1751;1752;1753;1754;1755;1756;1757;1758;1759;1760;1761;1762;3670;3705;3706;3707;3708;3709;3710;3711;3712;3713;3714;3715;3716;3717;3718;3719;3908;3909;3910;3911;3912;3913;3914;3915;3916;3917;3918;4073;4074;4075;4076;4077;4078;4079;4080;4081;4082;4083;4084;4085;4086;4087;4088;4089;4090;4091;4092;4093;4094…
P67778	P67778	10	10	10	Prohibitin	Phb	sp|P67778|PHB_MOUSE Prohibitin OS=Mus musculus OX=10090 GN=Phb PE=1 SV=1	1	10	10	10	8	9	8	9	8	9	55.9	55.9	55.9	29.82	272	272	0	96.595	By MS/MS	By MS/MS	38.6	49.6	864370000	281230000	583140000	48021000	15624000	32397000	286000000	384810000	9	12	21				302	11;22;38;651;847;1599;1925;2070;2189;3023	True;True;True;True;True;True;True;True;True;True	11;22;40;695;908;1700;2046;2202;2329;3247	18;19;20;21;40;41;82;1713;1714;2231;2232;4139;5124;5125;5126;5127;5545;5546;5897;5898;5899;5900;8375	16;17;18;19;36;69;1482;1483;1943;3618;4524;4525;4526;4527;4923;4924;5248;5249;5250;5251;7474
P67984	P67984	8	8	6	60S ribosomal protein L22	Rpl22	sp|P67984|RL22_MOUSE 60S ribosomal protein L22 OS=Mus musculus OX=10090 GN=Rpl22 PE=1 SV=2	1	8	8	6	8	8	8	8	6	6	60.2	60.2	53.1	14.759	128	128	0	96.619	By MS/MS	By MS/MS	60.2	60.2	60656000000	30677000000	29980000000	15164000000	7669100000	7494900000	39458000000	11013000000	16	21	37				303	171;1253;2035;2036;2215;3088;3595;4649	True;True;True;True;True;True;True;True	185;1340;1341;2166;2167;2358;3315;3863;4966	452;453;454;455;3258;3259;3260;3261;3262;3263;3264;3265;3266;3267;3268;5443;5444;5445;5446;5447;5448;5986;5987;5988;5989;8539;8540;8541;8542;9960;9961;9962;9963;9964;9965;12732;12733;12734;12735	394;395;396;397;398;399;2854;2855;2856;2857;2858;2859;2860;2861;2862;4824;4825;4826;4827;4828;4829;4830;4831;5321;5322;7613;7614;7615;8818;8819;8820;8821;8822;8823;11285;11286;11287;11288
P68037	P68037	2	2	2	Ubiquitin-conjugating enzyme E2 L3	Ube2l3	sp|P68037|UB2L3_MOUSE Ubiquitin-conjugating enzyme E2 L3 OS=Mus musculus OX=10090 GN=Ube2l3 PE=1 SV=1	1	2	2	2	0	2	0	2	0	2	30.5	30.5	30.5	17.861	154	154	0	15.183		By MS/MS	0	30.5	13612000	0	13612000	1944500	0	1944500	0	9093500	0	2	2				304	3020;3857	True;True	3244;4132	8371;10661	7470;9423
P68040	P68040	24	24	24	Guanine nucleotide-binding protein subunit beta-2-like 1;Guanine nucleotide-binding protein subunit beta-2-like 1, N-terminally processed	Gnb2l1	sp|P68040|RACK1_MOUSE Receptor of activated protein C kinase 1 OS=Mus musculus OX=10090 GN=Rack1 PE=1 SV=3	1	24	24	24	23	22	23	22	23	22	83	83	83	35.076	317	317	0	323.31	By MS/MS	By MS/MS	83	79.8	149740000000	75349000000	74391000000	7487000000	3767400000	3719500000	74392000000	48277000000	72	74	146				305	115;557;577;623;734;735;1240;1241;1403;1692;1899;1900;2060;2554;2797;2854;2855;2858;4011;4012;4548;4549;4762;4773	True;True;True;True;True;True;True;True;True;True;True;True;True;True;True;True;True;True;True;True;True;True;True;True	125;598;618;619;667;788;789;1327;1328;1496;1497;1799;2019;2020;2192;2717;2977;3037;3038;3041;4292;4293;4859;4860;5087;5098	310;311;312;313;314;315;316;317;318;319;1453;1454;1455;1456;1457;1458;1500;1501;1502;1503;1504;1505;1506;1507;1508;1509;1510;1636;1637;1638;1639;1939;1940;1941;1942;1943;1944;1945;1946;1947;1948;1949;3228;3229;3230;3231;3232;3646;3647;3648;3649;3650;3651;4392;4393;4394;4395;4396;4397;4398;4399;4400;4401;4402;4403;4404;4405;4406;4407;5031;5032;5033;5034;5035;5036;5037;5038;5039;5040;5041;5042;5043…	269;270;271;272;273;274;275;276;277;278;1263;1264;1265;1266;1267;1268;1306;1307;1308;1309;1310;1311;1312;1313;1419;1420;1421;1422;1682;1683;1684;1685;1686;1687;1688;1689;1690;1691;1692;1693;1694;2830;2831;2832;2833;2834;3188;3189;3190;3191;3192;3193;3859;3860;3861;3862;3863;3864;3865;3866;3867;3868;3869;3870;3871;3872;3873;3874;3875;3876;3877;3878;3879;4449;4450;4451;4452;4453;4454;4455;4456;4457…
P68368	P68368	15	3	3	Tubulin alpha-4A chain	Tuba4a	sp|P68368|TBA4A_MOUSE Tubulin alpha-4A chain OS=Mus musculus OX=10090 GN=Tuba4a PE=1 SV=1	1	15	3	3	11	14	1	3	1	3	47.5	9.8	9.8	49.924	448	448	0	23.927	By MS/MS	By MS/MS	34.6	47.3	41195000	13731000	27464000	1961700	653870	1307800	0	18348000	1	3	4				306	142;431;444;467;884;1857;2382;2528;3047;3271;3272;3414;3570;3930;4245	False;False;True;False;True;False;False;False;False;False;False;False;False;True;False	153;465;480;504;505;947;1974;2535;2690;3272;3512;3513;3665;3838;4209;4539	384;1124;1125;1167;1221;1222;1223;1224;2316;4904;4905;4906;4907;6501;6502;6503;6856;6857;8443;8444;8445;8446;9016;9017;9018;9019;9020;9021;9022;9023;9024;9448;9881;9882;10864;10865;11724;11725	332;972;1010;1057;1058;1059;1060;2015;4325;4326;4327;4328;5774;5775;6105;6106;7528;7529;7530;8027;8028;8029;8030;8031;8032;8033;8373;8754;9613;9614;10395;10396
P68372;Q9D6F9;Q922F4;CON__ENSEMBL:ENSBTAP00000025008;A2AQ07;P29517;P24636;P29515;P29513;Q9ASR0;Q56YW9;P12411;P29516;P29514	P68372;Q9D6F9	21;15;8;4;4;3;3;3;3;3;3;2;2;2	21;15;8;4;4;3;3;3;3;3;3;2;2;2	4;3;0;0;0;0;0;0;0;0;0;0;0;0	Tubulin beta-4B chain;Tubulin beta-4A chain	Tubb4b;Tubb4a	sp|P68372|TBB4B_MOUSE Tubulin beta-4B chain OS=Mus musculus OX=10090 GN=Tubb4b PE=1 SV=1;sp|Q9D6F9|TBB4A_MOUSE Tubulin beta-4A chain OS=Mus musculus OX=10090 GN=Tubb4a PE=1 SV=3	14	21	21	4	19	21	19	21	4	4	68.8	68.8	16	49.83	445	445;444;447;536;451;444;444;449;449;450;450;447;449;449	0	323.31	By MS/MS	By MS/MS	62	68.8	3404000000	1138000000	2266000000	170200000	56899000	113300000	1006700000	1358000000	22	32	54				307	290;452;779;899;1051;1210;1281;1410;1411;1957;1969;1996;2005;2183;2363;2491;2803;2939;3126;3537;4703	True;True;True;True;True;True;True;True;True;True;True;True;True;True;True;True;True;True;True;True;True	316;488;489;834;835;962;1120;1295;1370;1504;1505;2080;2081;2097;2124;2133;2323;2514;2515;2651;2652;2983;2984;3150;3360;3801;5025	789;790;1187;1188;1189;1190;2059;2060;2061;2362;2363;2364;2734;3159;3160;3348;3349;3350;3351;3669;3670;3671;3672;3673;3674;3675;3676;5231;5232;5233;5285;5286;5287;5346;5347;5348;5368;5369;5877;5878;6456;6457;6458;6459;6754;6755;6756;6757;6758;6759;6760;6761;7640;7641;7642;8096;8652;8653;9805;9806;9807;12861;12862	680;681;1026;1027;1028;1787;1788;1789;2055;2056;2057;2376;2767;2768;2937;2938;3209;3210;3211;3212;3213;3214;3215;3216;4634;4635;4689;4690;4744;4745;4760;4761;5229;5230;5736;5737;5738;6001;6002;6003;6004;6005;6006;6007;6008;6827;6828;6829;7222;7708;8689;8690;8691;11403;11404
P68510	P68510	3	2	2	14-3-3 protein eta	Ywhah	sp|P68510|1433F_MOUSE 14-3-3 protein eta OS=Mus musculus OX=10090 GN=Ywhah PE=1 SV=2	1	3	2	2	1	3	0	2	0	2	13.8	9.8	9.8	28.211	246	246	0	15.212	By matching	By MS/MS	4.1	13.8	51383000	0	51383000	3211500	0	3211500	0	34327000	0	2	2				308	707;928;1335	False;True;True	760;761;991;1426	1872;1873;1874;1875;2438;3486	1627;1628;1629;2123;3051
P70168	P70168	3	3	3	Importin subunit beta-1	Kpnb1	sp|P70168|IMB1_MOUSE Importin subunit beta-1 OS=Mus musculus OX=10090 GN=Kpnb1 PE=1 SV=2	1	3	3	3	3	3	3	3	3	3	4.5	4.5	4.5	97.183	876	876	0	22.213	By MS/MS	By MS/MS	4.5	4.5	60919000	29074000	31846000	1523000	726850	796140	21905000	24662000	4	2	6				310	43;2316;2889	True;True;True	45;2463;3076;3077	95;96;6309;6310;7923;7924;7925;7926	79;80;5614;5615;7075;7076;7077
P70280	P70280	2	2	2	Vesicle-associated membrane protein 7	Vamp7	sp|P70280|VAMP7_MOUSE Vesicle-associated membrane protein 7 OS=Mus musculus OX=10090 GN=Vamp7 PE=1 SV=1	1	2	2	2	2	2	2	2	2	2	8.2	8.2	8.2	24.967	220	220	0	11.575	By MS/MS	By MS/MS	8.2	8.2	24617000	15435000	9181500	1893600	1187300	706270	15142000	6426500	2	1	3				311	136;204	True;True	147;221	366;367;554;555	317;318;490
P70296	P70296	9	9	9	Phosphatidylethanolamine-binding protein 1;Hippocampal cholinergic neurostimulating peptide	Pebp1	sp|P70296|PEBP1_MOUSE Phosphatidylethanolamine-binding protein 1 OS=Mus musculus OX=10090 GN=Pebp1 PE=1 SV=3	1	9	9	9	2	9	2	9	2	9	81.8	81.8	81.8	20.83	187	187	0	82.567	By MS/MS	By MS/MS	21.4	81.8	666340000	37970000	628370000	66634000	3797000	62837000	40624000	404940000	1	10	11				312	6;1167;1502;2307;2875;4194;4385;4715;4772	True;True;True;True;True;True;True;True;True	6;1243;1600;2454;3059;4487;4685;4686;5038;5097	7;3020;3904;3905;3906;6290;7862;7863;11599;12086;12087;12893;13021	6;2649;3421;3422;5596;7021;10284;10725;10726;11428;11546
P70372	P70372	3	3	3	ELAV-like protein 1	Elavl1	sp|P70372|ELAV1_MOUSE ELAV-like protein 1 OS=Mus musculus OX=10090 GN=Elavl1 PE=1 SV=2	1	3	3	3	2	3	2	3	2	3	11.7	11.7	11.7	36.169	326	326	0	19.007	By MS/MS	By MS/MS	7.4	11.7	124340000	53380000	70961000	7771300	3336300	4435100	56018000	44768000	0	2	2				313	3074;3621;4391	True;True;True	3299;3890;4692	8503;10044;10045;12108;12109	7583;8898;8899;10744
Q60817;P70670	Q60817;P70670	3;3	3;3	3;3	Nascent polypeptide-associated complex subunit alpha;Nascent polypeptide-associated complex subunit alpha, muscle-specific form	Naca	sp|Q60817|NACA_MOUSE Nascent polypeptide-associated complex subunit alpha OS=Mus musculus OX=10090 GN=Naca PE=1 SV=1;sp|P70670|NACAM_MOUSE Nascent polypeptide-associated complex subunit alpha, muscle-specific form OS=Mus musculus OX=10090 GN=Naca PE=1 SV=2	2	3	3	3	3	3	3	3	3	3	19.1	19.1	19.1	23.384	215	215;2187	0	53.067	By MS/MS	By MS/MS	19.1	19.1	251810000	65187000	186620000	41969000	10865000	31104000	60689000	129170000	1	3	4				314	597;1787;3014	True;True;True	641;1903;3238	1556;1557;4712;4713;8351;8352	1350;4161;4162;7453
P80314;P78371	P80314;P78371	3;2	3;2	3;2	T-complex protein 1 subunit beta	Cct2;CCT2	sp|P80314|TCPB_MOUSE T-complex protein 1 subunit beta OS=Mus musculus OX=10090 GN=Cct2 PE=1 SV=4;sp|P78371|TCPB_HUMAN T-complex protein 1 subunit beta OS=Homo sapiens OX=9606 GN=CCT2 PE=1 SV=4	2	3	3	3	3	3	3	3	3	3	9.2	9.2	9.2	57.477	535	535;535	0	22.766	By MS/MS	By MS/MS	9.2	9.2	61017000	30525000	30492000	1906800	953900	952880	27227000	23668000	3	4	7				316	382;2755;4444	True;True;True	416;2932;4749	1034;1035;7484;7485;12246;12247;12248	899;900;6699;6700;10868;10869;10870
P80315	P80315	4	4	4	T-complex protein 1 subunit delta	Cct4	sp|P80315|TCPD_MOUSE T-complex protein 1 subunit delta OS=Mus musculus OX=10090 GN=Cct4 PE=1 SV=3	1	4	4	4	4	4	4	4	4	4	10	10	10	58.066	539	539	0	30.815	By MS/MS	By MS/MS	10	10	117890000	60330000	57559000	3572400	1828200	1744200	55061000	43722000	4	3	7				317	265;528;1840;4275	True;True;True;True	288;568;1957;4570	731;732;1365;1366;1367;1368;4856;4857;11812;11813	641;642;1185;1186;1187;1188;4287;4288;10474;10475
P80316	P80316	6	6	6	T-complex protein 1 subunit epsilon	Cct5	sp|P80316|TCPE_MOUSE T-complex protein 1 subunit epsilon OS=Mus musculus OX=10090 GN=Cct5 PE=1 SV=1	1	6	6	6	5	6	5	6	5	6	16.6	16.6	16.6	59.623	541	541	0	53.939	By MS/MS	By MS/MS	13.1	16.6	80364000	30820000	49544000	2678800	1027300	1651500	26914000	37004000	2	4	6				318	394;723;1747;2465;4390;4604	True;True;True;True;True;True	428;777;1862;2623;4691;4917	1055;1909;1910;4602;4603;6705;6706;12106;12107;12626;12627	914;1657;4047;5964;10742;10743;11196
P80317	P80317	4	4	4	T-complex protein 1 subunit zeta	Cct6a	sp|P80317|TCPZ_MOUSE T-complex protein 1 subunit zeta OS=Mus musculus OX=10090 GN=Cct6a PE=1 SV=3	1	4	4	4	3	4	3	4	3	4	10.2	10.2	10.2	58.004	531	531	0	26.016	By MS/MS	By MS/MS	7	10.2	121290000	69030000	52262000	4665100	2655000	2010100	71884000	32059000	3	2	5				319	281;354;1415;4325	True;True;True;True	304;385;1509;4623	763;764;956;3682;3683;11937;11938	662;663;827;3220;10584;10585
P80318	P80318	5	5	5	T-complex protein 1 subunit gamma	Cct3	sp|P80318|TCPG_MOUSE T-complex protein 1 subunit gamma OS=Mus musculus OX=10090 GN=Cct3 PE=1 SV=1	1	5	5	5	5	4	5	4	5	4	12.1	12.1	12.1	60.629	545	545	0	31.417	By MS/MS	By MS/MS	12.1	7.3	119080000	64565000	54512000	3721200	2017600	1703500	63370000	37612000	4	2	6				320	890;894;2049;3143;3836	True;True;True;True;True	953;957;2181;3377;4109	2347;2348;2354;2355;5498;5499;8684;10580;10581	2044;2049;4878;4879;7729;9350
P83870;Q0WMV8;P0DI19	P83870	3;1;1	3;1;1	3;1;1	PHD finger-like domain-containing protein 5A	Phf5a	sp|P83870|PHF5A_MOUSE PHD finger-like domain-containing protein 5A OS=Mus musculus OX=10090 GN=Phf5a PE=1 SV=1	3	3	3	3	1	3	1	3	1	3	32.7	32.7	32.7	12.405	110	110;110;110	0	20.026	By matching	By MS/MS	6.4	32.7	44806000	8696900	36109000	5600700	1087100	4513600	0	24123000	0	2	2				321	510;1769;3854	True;True;True	550;1885;4129	1333;4671;10656;10657	1156;4125;9420
P84089	P84089	3	3	3	Enhancer of rudimentary homolog	Erh	sp|P84089|ERH_MOUSE Enhancer of rudimentary homolog OS=Mus musculus OX=10090 GN=Erh PE=1 SV=1	1	3	3	3	2	3	2	3	2	3	41.3	41.3	41.3	12.259	104	104	0	63.07	By MS/MS	By MS/MS	25	41.3	419930000	121790000	298140000	83986000	24359000	59628000	127510000	193450000	1	4	5				322	93;3551;4114	True;True;True	98;3817;4404	229;230;231;232;9839;9840;11380	197;198;8719;8720;10088
P84099	P84099	16	16	16	60S ribosomal protein L19	Rpl19	sp|P84099|RL19_MOUSE 60S ribosomal protein L19 OS=Mus musculus OX=10090 GN=Rpl19 PE=1 SV=1	1	16	16	16	16	15	16	15	16	15	39.3	39.3	39.3	23.466	196	196	0	225.46	By MS/MS	By MS/MS	39.3	34.2	53170000000	29634000000	23536000000	8861700000	4939000000	3922700000	28704000000	13033000000	34	26	60				323	1695;1939;2173;2181;2198;2199;2200;2301;2349;2518;2565;2566;2693;3384;3395;4547	True;True;True;True;True;True;True;True;True;True;True;True;True;True;True;True	1804;1805;2060;2061;2313;2321;2338;2339;2340;2447;2499;2680;2728;2729;2870;3631;3632;3643;4858	4420;4421;4422;4423;4424;4425;4426;4427;4428;4429;5152;5153;5154;5155;5849;5850;5851;5852;5871;5872;5873;5874;5921;5922;5923;5924;5925;5926;5927;5928;5929;5930;5931;5932;5933;5934;6262;6263;6264;6265;6396;6397;6834;6835;6836;6837;6979;6980;6981;6982;6983;6984;7340;7341;9349;9350;9351;9352;9353;9354;9355;9356;9384;9385;12483;12484;12485;12486;12487;12488;12489	3892;3893;3894;3895;3896;3897;3898;3899;3900;4547;4548;4549;4550;4551;5206;5207;5208;5224;5225;5226;5270;5271;5272;5273;5274;5275;5276;5277;5278;5565;5566;5567;5568;5679;6083;6084;6085;6218;6219;6220;6221;6222;6223;6224;6580;6581;8296;8297;8298;8299;8300;8301;8302;8325;11061;11062;11063;11064;11065;11066;11067;11068;11069
P84104	P84104	3	2	2	Serine/arginine-rich splicing factor 3	Srsf3	sp|P84104|SRSF3_MOUSE Serine/arginine-rich splicing factor 3 OS=Mus musculus OX=10090 GN=Srsf3 PE=1 SV=1	1	3	2	2	2	3	1	2	1	2	18.3	18.3	18.3	19.329	164	164	0	21.294	By MS/MS	By MS/MS	14	18.3	147750000	19588000	128170000	21108000	2798300	18310000	0	85623000	0	2	2				324	124;3103;3104	True;False;True	134;3333;3334	334;335;8587;8588;8589;8590;8591	292;293;7653;7654;7655;7656
P97351;Q9CAV0;Q42262	P97351	31;1;1	31;1;1	31;1;1	40S ribosomal protein S3a	Rps3a	sp|P97351|RS3A_MOUSE 40S ribosomal protein S3a OS=Mus musculus OX=10090 GN=Rps3a PE=1 SV=3	3	31	31	31	30	21	30	21	30	21	70.8	70.8	70.8	29.885	264	264;262;262	0	323.31	By MS/MS	By MS/MS	70.8	59.1	99930000000	57091000000	42840000000	5878200000	3358300000	2520000000	53020000000	27815000000	52	47	99				325	17;57;58;70;323;752;1061;1116;1165;1551;1552;2104;2180;2294;2295;2302;2424;2425;2525;2532;2642;2921;2973;4066;4207;4219;4220;4519;4520;4521;4599	True;True;True;True;True;True;True;True;True;True;True;True;True;True;True;True;True;True;True;True;True;True;True;True;True;True;True;True;True;True;True	17;59;60;73;351;352;806;1130;1186;1241;1651;1652;2238;2320;2440;2441;2448;2449;2580;2581;2687;2694;2810;2811;3121;3122;3192;3193;4349;4500;4513;4514;4829;4830;4831;4911;4912	30;122;123;124;125;126;127;128;129;130;131;154;155;156;157;879;880;881;882;1992;2751;2752;2753;2754;2882;3018;4031;4032;4033;5639;5640;5870;6246;6247;6248;6266;6267;6268;6269;6270;6271;6272;6600;6601;6602;6603;6604;6605;6850;6851;6852;6853;6863;7189;7190;7191;7192;7193;7194;7195;7196;7197;8024;8025;8026;8027;8028;8029;8200;8201;8202;8203;8204;8205;8206;8207;11211;11212;11213;11214;11215;11216;116…	27;105;106;107;108;109;110;111;112;113;114;115;116;135;136;137;138;755;756;757;1726;2390;2391;2392;2393;2519;2647;3525;3526;3527;5011;5012;5223;5551;5552;5569;5570;5571;5572;5573;5574;5864;5865;5866;5867;5868;5869;5870;6100;6101;6102;6112;6451;6452;6453;6454;6455;6456;6457;6458;6459;7161;7162;7163;7164;7165;7309;7310;7311;7312;7313;7314;7315;9929;9930;9931;9932;10308;10328;10329;10330;10331;10332…
P97370	P97370	2	2	2	Sodium/potassium-transporting ATPase subunit beta-3	Atp1b3	sp|P97370|AT1B3_MOUSE Sodium/potassium-transporting ATPase subunit beta-3 OS=Mus musculus OX=10090 GN=Atp1b3 PE=1 SV=1	1	2	2	2	1	2	1	2	1	2	11.2	11.2	11.2	31.775	278	278	0	13.092	By matching	By MS/MS	5	11.2	39519000	8440700	31078000	2634600	562710	2071900	0	20762000	0	2	2				326	1870;2438	True;True	1988;2595	4935;6634;6635	4354;5896
P97461	P97461	12	12	10	40S ribosomal protein S5;40S ribosomal protein S5, N-terminally processed	Rps5	sp|P97461|RS5_MOUSE 40S ribosomal protein S5 OS=Mus musculus OX=10090 GN=Rps5 PE=1 SV=3	1	12	12	10	12	12	12	12	10	10	41.7	41.7	37.3	22.889	204	204	0	206.74	By MS/MS	By MS/MS	41.7	41.7	54059000000	22318000000	31741000000	5405900000	2231800000	3174100000	23926000000	19064000000	31	37	68				327	344;2086;2791;2946;3207;3208;3428;3450;3878;3879;4415;4600	True;True;True;True;True;True;True;True;True;True;True;True	373;2219;2968;2969;2970;2971;3161;3162;3446;3447;3680;3702;4153;4154;4720;4913	935;936;5588;5589;5590;5591;5592;7579;7580;7581;7582;7583;7584;7585;7586;7587;7588;7589;7590;7591;7592;7593;7594;7595;7596;7597;8125;8126;8127;8128;8129;8854;8855;8856;8857;8858;8859;8860;8861;9489;9490;9491;9492;9555;9556;9557;9558;10708;10709;10710;10711;10712;10713;10714;10715;10716;10717;10718;10719;10720;10721;10722;12174;12175;12176;12177;12178;12179;12180;12612;12613;12614;12615;12616;1261…	806;807;4964;4965;4966;4967;6772;6773;6774;6775;6776;6777;6778;6779;6780;6781;6782;6783;6784;6785;6786;7246;7247;7248;7249;7250;7883;7884;7885;7886;7887;7888;8410;8411;8412;8413;8474;8475;8476;8477;9468;9469;9470;9471;9472;9473;9474;9475;9476;9477;9478;10798;10799;10800;10801;10802;10803;10804;10805;10806;10807;10808;11182;11183;11184;11185;11186;11187;11188;11189;11190
P97807	P97807	2	2	2	Fumarate hydratase, mitochondrial	Fh	sp|P97807|FUMH_MOUSE Fumarate hydratase, mitochondrial OS=Mus musculus OX=10090 GN=Fh PE=1 SV=3	1	2	2	2	1	2	1	2	1	2	5.3	5.3	5.3	54.356	507	507	0	12.082	By matching	By MS/MS	2.6	5.3	24313000	1713800	22599000	900480	63476	837000	0	15097000	0	2	2				328	2;2931	True;True	2;3140	3;8078;8079	2;7208
P97822	P97822	5	5	5	Acidic leucine-rich nuclear phosphoprotein 32 family member E	Anp32e	sp|P97822|AN32E_MOUSE Acidic leucine-rich nuclear phosphoprotein 32 family member E OS=Mus musculus OX=10090 GN=Anp32e PE=1 SV=2	1	5	5	5	3	5	3	5	3	5	23.8	23.8	23.8	29.622	260	260	0	84.996	By MS/MS	By MS/MS	10.4	23.8	208140000	41327000	166810000	26017000	5165900	20851000	49811000	102950000	2	7	9				329	505;655;1906;2192;3606	True;True;True;True;True	545;699;2026;2332;3875	1320;1321;1720;1721;5060;5061;5062;5063;5906;5907;10006	1146;1487;1488;4478;4479;4480;5256;5257;8862
P97855	P97855	3	3	3	Ras GTPase-activating protein-binding protein 1	G3bp1	sp|P97855|G3BP1_MOUSE Ras GTPase-activating protein-binding protein 1 OS=Mus musculus OX=10090 GN=G3bp1 PE=1 SV=1	1	3	3	3	3	3	3	3	3	3	9.2	9.2	9.2	51.828	465	465	0	28.651	By MS/MS	By MS/MS	9.2	9.2	56699000	21294000	35404000	2577200	967920	1609300	22139000	22807000	2	2	4				330	1289;2684;3769	True;True;True	1378;2861;4041	3371;3372;7325;7326;10429;10430	2960;2961;6568;9228
P99024	P99024	20	5	4	Tubulin beta-5 chain	Tubb5	sp|P99024|TBB5_MOUSE Tubulin beta-5 chain OS=Mus musculus OX=10090 GN=Tubb5 PE=1 SV=1	1	20	5	4	19	20	5	5	4	4	64.9	19.4	16	49.67	444	444	0	64.569	By MS/MS	By MS/MS	62.2	64.9	794830000	340490000	454340000	39742000	17025000	22717000	291870000	293150000	6	6	12				331	205;291;779;1051;1210;1280;1410;1411;1957;1996;2005;2017;2183;2363;2491;2803;2882;3126;3537;4703	True;True;False;False;False;True;False;False;False;False;False;True;False;False;False;False;True;False;False;False	222;223;317;834;835;1120;1295;1369;1504;1505;2080;2081;2124;2133;2146;2323;2514;2515;2651;2652;2983;2984;3068;3360;3801;5025	556;557;558;559;791;792;2059;2060;2061;2734;3159;3160;3344;3345;3346;3347;3669;3670;3671;3672;3673;3674;3675;3676;5231;5232;5233;5346;5347;5348;5368;5369;5398;5399;5877;5878;6456;6457;6458;6459;6754;6755;6756;6757;6758;6759;6760;6761;7640;7641;7642;7906;7907;7908;7909;8652;8653;9805;9806;9807;12861;12862	491;492;493;494;682;683;1787;1788;1789;2376;2767;2768;2933;2934;2935;2936;3209;3210;3211;3212;3213;3214;3215;3216;4634;4635;4744;4745;4760;4761;4787;5229;5230;5736;5737;5738;6001;6002;6003;6004;6005;6006;6007;6008;6827;6828;6829;7064;7065;7708;8689;8690;8691;11403;11404
P99026	P99026	3	3	3	Proteasome subunit beta type-4	Psmb4	sp|P99026|PSB4_MOUSE Proteasome subunit beta type-4 OS=Mus musculus OX=10090 GN=Psmb4 PE=1 SV=1	1	3	3	3	1	3	1	3	1	3	17.8	17.8	17.8	29.116	264	264	0	26.846	By matching	By MS/MS	5.7	17.8	26861000	2548300	24313000	2441900	231660	2210300	0	16242000	0	3	3				332	3302;3329;4039	True;True;True	3544;3573;4321	9096;9161;11149;11150	8093;8146;9875
P99027	P99027	12	12	12	60S acidic ribosomal protein P2	Rplp2	sp|P99027|RLA2_MOUSE 60S acidic ribosomal protein P2 OS=Mus musculus OX=10090 GN=Rplp2 PE=1 SV=3	1	12	12	12	11	12	11	12	11	12	97.4	97.4	97.4	11.651	115	115	0	294.46	By MS/MS	By MS/MS	82.6	97.4	26209000000	10751000000	15458000000	5241900000	2150300000	3091600000	10949000000	9898600000	25	26	51				333	1919;1920;2108;2162;2352;2353;2354;2938;3011;4299;4300;4765	True;True;True;True;True;True;True;True;True;True;True;True	2040;2041;2243;2301;2502;2503;2504;3149;3235;4595;4596;5090	5098;5099;5100;5101;5102;5103;5104;5105;5106;5107;5108;5109;5110;5111;5112;5652;5811;5812;5813;5814;5815;6405;6406;6407;6408;6409;6410;6411;6412;6413;6414;6415;6416;6417;6418;8094;8095;8343;8344;8345;8346;11859;11860;11861;11862;11863;11864;11865;13001;13002;13003;13004;13005;13006;13007;13008	4506;4507;4508;4509;4510;4511;4512;4513;4514;4515;4516;4517;5023;5174;5175;5176;5177;5178;5684;5685;5686;5687;5688;5689;5690;5691;5692;5693;5694;5695;5696;5697;7221;7443;7444;7445;7446;7447;7448;10512;10513;10514;10515;10516;10517;11524;11525;11526;11527;11528;11529;11530
P99029	P99029	2	2	2	Peroxiredoxin-5, mitochondrial	Prdx5	sp|P99029|PRDX5_MOUSE Peroxiredoxin-5, mitochondrial OS=Mus musculus OX=10090 GN=Prdx5 PE=1 SV=2	1	2	2	2	0	2	0	2	0	2	8.6	8.6	8.6	21.897	210	210	0	13.364		By MS/MS	0	8.6	10343000	0	10343000	738770	0	738770	0	6909500	0	2	2				334	404;405	True;True	438;439	1072;1073	929;930
Q00PI9	Q00PI9	2	2	2	Heterogeneous nuclear ribonucleoprotein U-like protein 2	Hnrnpul2	sp|Q00PI9|HNRL2_MOUSE Heterogeneous nuclear ribonucleoprotein U-like protein 2 OS=Mus musculus OX=10090 GN=Hnrnpul2 PE=1 SV=2	1	2	2	2	0	2	0	2	0	2	4.3	4.3	4.3	84.939	745	745	0	11.629		By MS/MS	0	4.3	19685000	0	19685000	578970	0	578970	0	13151000	0	2	2				335	835;850	True;True	896;911	2211;2237	1925;1948
Q01320	Q01320	6	6	4	DNA topoisomerase 2-alpha	Top2a	sp|Q01320|TOP2A_MOUSE DNA topoisomerase 2-alpha OS=Mus musculus OX=10090 GN=Top2a PE=1 SV=2	1	6	6	4	4	6	4	6	2	4	6.4	6.4	5	172.79	1528	1528	0	37.733	By matching	By MS/MS	3.7	6.4	96554000	25935000	70619000	1222200	328290	893910	30014000	43099000	0	6	6				336	939;1064;1178;2073;2203;4739	True;True;True;True;True;True	1003;1133;1258;2205;2343;5063	2471;2472;2759;2760;3057;3058;5550;5551;5941;12944	2153;2398;2683;4927;5282;11473
Q02053;P22314;P31254;P31255	Q02053;P22314	10;6;2;1	10;6;2;1	10;6;2;1	Ubiquitin-like modifier-activating enzyme 1	Uba1;UBA1	sp|Q02053|UBA1_MOUSE Ubiquitin-like modifier-activating enzyme 1 OS=Mus musculus OX=10090 GN=Uba1 PE=1 SV=1;sp|P22314|UBA1_HUMAN Ubiquitin-like modifier-activating enzyme 1 OS=Homo sapiens OX=9606 GN=UBA1 PE=1 SV=3	4	10	10	10	5	10	5	10	5	10	15.3	15.3	15.3	117.81	1058	1058;1058;1058;152	0	70.207	By MS/MS	By MS/MS	6.8	15.3	207050000	38547000	168510000	3834300	713840	3120500	42962000	108160000	2	11	13				337	40;677;1516;2064;2225;2327;2553;3295;3643;4646	True;True;True;True;True;True;True;True;True;True	42;729;1615;2196;2368;2475;2716;3537;3912;4963	85;86;87;88;1795;1796;3942;5536;6017;6336;6337;6338;6339;6922;6923;9079;10092;12727;12728	72;73;74;75;1559;3454;4914;5346;5634;5635;5636;5637;6163;8079;8944;11281
Q03265;P92549;P56757	Q03265	18;3;1	18;3;1	18;3;1	ATP synthase subunit alpha, mitochondrial	Atp5a1	sp|Q03265|ATPA_MOUSE ATP synthase subunit alpha, mitochondrial OS=Mus musculus OX=10090 GN=Atp5f1a PE=1 SV=1	3	18	18	18	17	18	17	18	17	18	39.8	39.8	39.8	59.752	553	553;507;507	0	182.1	By MS/MS	By MS/MS	37.1	39.8	2833100000	1112100000	1721000000	91389000	35874000	55515000	1108400000	1148100000	16	21	37				338	328;438;803;1118;1431;1499;1622;1632;1926;2416;3146;3772;3894;3906;4054;4384;4515;4516	True;True;True;True;True;True;True;True;True;True;True;True;True;True;True;True;True;True	357;474;860;1188;1525;1595;1596;1724;1734;2047;2571;3380;4044;4172;4184;4336;4684;4825;4826	892;893;1154;1155;2114;2115;2116;2117;2885;2886;3717;3718;3895;3896;3897;3898;4186;4187;4205;4206;4207;5128;5129;6579;6580;8691;10434;10435;10436;10437;10765;10766;10767;10768;10787;10788;11181;11182;12084;12085;12411;12412;12413;12414;12415;12416	763;764;999;1000;1832;1833;1834;1835;2521;3244;3416;3417;3659;3660;3673;3674;3675;4528;4529;5843;5844;7735;9232;9233;9510;9511;9512;9529;9530;9902;9903;10723;10724;11004;11005;11006;11007;11008;11009
Q05CL8	Q05CL8	2	2	2	La-related protein 7	Larp7	sp|Q05CL8|LARP7_MOUSE La-related protein 7 OS=Mus musculus OX=10090 GN=Larp7 PE=1 SV=2	1	2	2	2	2	2	2	2	2	2	4.7	4.7	4.7	64.802	570	570	0	12.308	By matching	By MS/MS	4.7	4.7	46432000	20347000	26085000	1547700	678230	869510	20396000	17377000	0	2	2				339	624;4465	True;True	668;4773	1640;1641;12308;12309	1423;10920
Q06185	Q06185	2	2	2	ATP synthase subunit e, mitochondrial	Atp5i	sp|Q06185|ATP5I_MOUSE ATP synthase subunit e, mitochondrial OS=Mus musculus OX=10090 GN=Atp5me PE=1 SV=2	1	2	2	2	1	2	1	2	1	2	32.4	32.4	32.4	8.2355	71	71	0	12.278	By matching	By MS/MS	16.9	32.4	27984000	4949800	23034000	9327900	1649900	7678000	0	15388000	0	1	1				340	911;4435	True;True	974;4740	2393;2394;12227	2082;10850
Q08288	Q08288	3	3	3	Cell growth-regulating nucleolar protein	Lyar	sp|Q08288|LYAR_MOUSE Cell growth-regulating nucleolar protein OS=Mus musculus OX=10090 GN=Lyar PE=1 SV=2	1	3	3	3	1	3	1	3	1	3	11.3	11.3	11.3	43.735	388	388	0	26.908	By matching	By MS/MS	3.1	11.3	73285000	5061100	68223000	4310900	297710	4013100	0	45577000	0	5	5				341	943;950;2677	True;True;True	1007;1014;2854	2481;2482;2483;2497;7313	2160;2161;2171;2172;6556
Q08943	Q08943	3	3	3	FACT complex subunit SSRP1	Ssrp1	sp|Q08943|SSRP1_MOUSE FACT complex subunit SSRP1 OS=Mus musculus OX=10090 GN=Ssrp1 PE=1 SV=2	1	3	3	3	2	3	2	3	2	3	6.9	6.9	6.9	80.859	708	708	0	18.992	By matching	By MS/MS	4.9	6.9	26993000	4013700	22980000	899780	133790	765990	0	15352000	0	2	2				342	118;1100;1290	True;True;True	128;1169;1379	325;2837;2838;3373;3374	284;2470;2962
Q14C51	Q14C51	7	7	7	Pentatricopeptide repeat domain-containing protein 3, mitochondrial	Ptcd3	sp|Q14C51|PTCD3_MOUSE Pentatricopeptide repeat domain-containing protein 3, mitochondrial OS=Mus musculus OX=10090 GN=Ptcd3 PE=1 SV=2	1	7	7	7	3	7	3	7	3	7	15.3	15.3	15.3	77.795	685	685	0	45.885	By MS/MS	By MS/MS	4.7	15.3	207010000	57744000	149270000	5175200	1443600	3731600	60452000	97010000	2	5	7				343	594;1151;1970;2345;2733;4199;4532	True;True;True;True;True;True;True	638;1224;2098;2495;2910;4492;4843	1550;2970;2971;5288;5289;6386;7436;11607;11608;12452	1344;2604;4691;5671;6661;10290;10291;11041
Q3TBW2	Q3TBW2	3	3	3	39S ribosomal protein L10, mitochondrial	Mrpl10	sp|Q3TBW2|RM10_MOUSE 39S ribosomal protein L10, mitochondrial OS=Mus musculus OX=10090 GN=Mrpl10 PE=1 SV=2	1	3	3	3	2	3	2	3	2	3	20.2	20.2	20.2	29.395	262	262	0	29.548	By MS/MS	By MS/MS	13	20.2	122210000	26127000	96083000	7638100	1632900	6005200	33085000	57231000	2	5	7				344	3055;3793;4231	True;True;True	3280;4065;4525	8463;8464;8465;10493;11691;11692;11693;11694	7548;7549;7550;9279;10363;10364;10365
Q3TEA8	Q3TEA8	4	4	4	Heterochromatin protein 1-binding protein 3	Hp1bp3	sp|Q3TEA8|HP1B3_MOUSE Heterochromatin protein 1-binding protein 3 OS=Mus musculus OX=10090 GN=Hp1bp3 PE=1 SV=1	1	4	4	4	4	3	4	3	4	3	8.1	8.1	8.1	60.866	554	554	0	24.032	By MS/MS	By MS/MS	8.1	6.1	85958000	42139000	43820000	3438300	1685500	1752800	41948000	29465000	4	1	5				345	277;278;2410;3939	True;True;True;True	300;301;2565;4218	756;757;758;759;6569;10886;10887	657;658;659;5835;9635
Q3THE2;Q9CQ19	Q3THE2	7;3	7;3	7;3	Myosin regulatory light chain 12B	Myl12b	sp|Q3THE2|ML12B_MOUSE Myosin regulatory light chain 12B OS=Mus musculus OX=10090 GN=Myl12b PE=1 SV=2	2	7	7	7	3	7	3	7	3	7	56.4	56.4	56.4	19.779	172	172;172	0	87.848	By MS/MS	By MS/MS	17.4	56.4	312510000	30800000	281710000	34723000	3422200	31301000	31016000	187980000	1	6	7				346	421;573;955;1248;1505;2653;2960	True;True;True;True;True;True;True	455;614;1019;1335;1603;2822;3179	1106;1107;1494;2516;2517;3249;3250;3913;3914;7217;8170	957;958;1300;2191;2192;2848;3427;3428;6476;7282
Q3THK7	Q3THK7	3	3	3	GMP synthase [glutamine-hydrolyzing]	Gmps	sp|Q3THK7|GUAA_MOUSE GMP synthase [glutamine-hydrolyzing] OS=Mus musculus OX=10090 GN=Gmps PE=1 SV=2	1	3	3	3	1	3	1	3	1	3	7.5	7.5	7.5	76.723	693	693	0	17.021	By matching	By MS/MS	2.9	7.5	8573400	854280	7719200	204130	20340	183790	0	5156800	0	3	3				347	551;930;993	True;True;True	591;994;1061	1433;2450;2601;2602	1245;2137;2263
Q3TLH4	Q3TLH4	2	2	2	Protein PRRC2C	Prrc2c	sp|Q3TLH4|PRC2C_MOUSE Protein PRRC2C OS=Mus musculus OX=10090 GN=Prrc2c PE=1 SV=3	1	2	2	2	2	1	2	1	2	1	1	1	1	310.89	2846	2846	0	12.927	By MS/MS	By matching	1	0.4	27884000	24062000	3821600	276080	238240	37837	24062000	0	2	0	2				348	123;3866	True;True	133;4141	333;10680;10681	291;9438
Q3U1G5	Q3U1G5	2	2	2	Interferon-stimulated 20 kDa exonuclease-like 2	Isg20l2	sp|Q3U1G5|I20L2_MOUSE Interferon-stimulated 20 kDa exonuclease-like 2 OS=Mus musculus OX=10090 GN=Isg20l2 PE=1 SV=2	1	2	2	2	1	2	1	2	1	2	7.6	7.6	7.6	41.019	368	368	0	14.725	By MS/MS	By MS/MS	3.5	7.6	53323000	10404000	42919000	3136600	612000	2524600	0	28672000	1	1	2				349	1782;3764	True;True	1898;4036	4699;4700;10421	4148;4149;9223
Q3U9G9	Q3U9G9	5	5	5	Lamin-B receptor	Lbr	sp|Q3U9G9|LBR_MOUSE Lamin-B receptor OS=Mus musculus OX=10090 GN=Lbr PE=1 SV=2	1	5	5	5	3	5	3	5	3	5	8	8	8	71.439	626	626	0	41.309	By MS/MS	By MS/MS	3.7	8	209380000	71763000	137620000	9103600	3120100	5983500	101610000	62087000	2	2	4				350	834;1266;1517;1518;3707	True;True;True;True;True	895;1355;1616;1617;3979	2210;3313;3943;3944;3945;3946;10253;10254	1924;2910;3455;3456;3457;3458;9080
Q3UJB9	Q3UJB9	16	16	16	Enhancer of mRNA-decapping protein 4	Edc4	sp|Q3UJB9|EDC4_MOUSE Enhancer of mRNA-decapping protein 4 OS=Mus musculus OX=10090 GN=Edc4 PE=1 SV=2	1	16	16	16	9	15	9	15	9	15	21.1	21.1	21.1	152.48	1406	1406	0	133.81	By MS/MS	By MS/MS	10	19.6	639910000	180160000	459750000	10321000	2905700	7415300	169670000	317630000	3	12	15				351	1;119;369;780;1494;1525;1727;1902;2366;2447;2485;2771;3327;3477;3631;3742	True;True;True;True;True;True;True;True;True;True;True;True;True;True;True;True	1;129;402;836;1588;1624;1840;2022;2518;2605;2645;2948;3570;3731;3900;4014	2;326;327;1004;1005;2062;2063;3882;3962;4547;5052;6463;6464;6658;6659;6743;7528;9155;9156;9632;10069;10070;10359;10360;10361	1;285;874;1790;3405;3472;4006;4471;5742;5921;5922;5992;6733;8142;8546;8922;8923;9164;9165
Q3UM45	Q3UM45	2	2	2	Protein phosphatase 1 regulatory subunit 7	Ppp1r7	sp|Q3UM45|PP1R7_MOUSE Protein phosphatase 1 regulatory subunit 7 OS=Mus musculus OX=10090 GN=Ppp1r7 PE=1 SV=2	1	2	2	2	0	2	0	2	0	2	8	8	8	41.291	361	361	0	10.734		By MS/MS	0	8	7756400	0	7756400	369350	0	369350	0	5181700	0	2	2				352	197;1798	True;True	214;1915	530;4765	463;4214
Q3UVK0	Q3UVK0	3	3	3	Endoplasmic reticulum metallopeptidase 1	Ermp1	sp|Q3UVK0|ERMP1_MOUSE Endoplasmic reticulum metallopeptidase 1 OS=Mus musculus OX=10090 GN=Ermp1 PE=1 SV=2	1	3	3	3	2	3	2	3	2	3	5.1	5.1	5.1	100.15	898	898	0	17.758	By matching	By MS/MS	2.4	5.1	28753000	5469200	23284000	845690	160860	684830	8201800	12823000	0	2	2				353	150;758;1702	True;True;True	161;812;1813	399;400;2002;2003;4455	346;1734;3922
Q4VBE8	Q4VBE8	2	2	2	WD repeat-containing protein 18	Wdr18	sp|Q4VBE8|WDR18_MOUSE WD repeat-containing protein 18 OS=Mus musculus OX=10090 GN=Wdr18 PE=1 SV=1	1	2	2	2	1	2	1	2	1	2	5.1	5.1	5.1	47.211	431	431	0	12.781	By matching	By MS/MS	1.9	5.1	16343000	2868200	13475000	860160	150960	709200	0	9001900	0	2	2				355	634;2421	True;True	678;2576	1664;1665;6588	1441;5851
Q501J6;Q8W4R3;Q8LA13;Q8H136;Q84W89;Q9LYJ9;Q9M2F9;Q9SQV1	Q501J6	17;2;1;1;1;1;1;1	11;0;0;0;0;0;0;0	11;0;0;0;0;0;0;0	Probable ATP-dependent RNA helicase DDX17	Ddx17	sp|Q501J6|DDX17_MOUSE Probable ATP-dependent RNA helicase DDX17 OS=Mus musculus OX=10090 GN=Ddx17 PE=1 SV=1	8	17	11	11	16	17	10	11	10	11	30.5	20.3	20.3	72.399	650	650;591;612;619;633;645;646;1088	0	105.33	By MS/MS	By MS/MS	27.4	30.5	730720000	286020000	444710000	22835000	8938000	13897000	263300000	319800000	6	8	14				356	330;751;917;1275;1328;1573;1593;2041;2511;2795;2914;3709;3748;3757;3933;3960;4344	False;True;True;True;False;True;False;False;True;True;False;True;True;False;True;True;True	359;805;980;1364;1419;1673;1694;2172;2672;2975;3113;3981;4020;4029;4212;4240;4643	900;901;1990;1991;2413;2414;3332;3333;3472;3473;4074;4075;4127;4128;5463;5464;6810;6811;7614;7615;7616;8009;8010;10256;10257;10258;10259;10381;10382;10401;10402;10869;10870;10937;11988;11989	771;772;1725;2101;2923;2924;3042;3563;3564;3609;4845;4846;6051;6052;6804;6805;7150;9082;9083;9188;9189;9206;9207;9618;9684;10636;10637
Q569Z6	Q569Z6	2	2	2	Thyroid hormone receptor-associated protein 3	Thrap3	sp|Q569Z6|TR150_MOUSE Thyroid hormone receptor-associated protein 3 OS=Mus musculus OX=10090 GN=Thrap3 PE=1 SV=1	1	2	2	2	1	2	1	2	1	2	3.3	3.3	3.3	108.18	951	951	0	13.653	By matching	By MS/MS	1.9	3.3	48271000	8278400	39993000	1122600	192520	930070	0	26717000	0	2	2				357	3558;3692	True;True	3824;3963	9850;10213;10214	8729;9041
Q5XG71	Q5XG71	2	2	2	Small subunit processome component 20 homolog	Utp20	sp|Q5XG71|UTP20_MOUSE Small subunit processome component 20 homolog OS=Mus musculus OX=10090 GN=Utp20 PE=1 SV=2	1	2	2	2	2	0	2	0	2	0	0.9	0.9	0.9	317.74	2788	2788	0	10.884	By MS/MS		0.9	0	103960000	103960000	0	758840	758840	0	103960000	0	2	0	2				358	965;1194	True;True	1029;1274	2539;3090	2211;2712
Q61584	Q61584	2	2	2	Fragile X mental retardation syndrome-related protein 1	Fxr1	sp|Q61584|FXR1_MOUSE Fragile X mental retardation syndrome-related protein 1 OS=Mus musculus OX=10090 GN=Fxr1 PE=1 SV=2	2	2	2	2	2	2	2	2	2	2	5.5	5.5	5.5	63.947	568	568;677	0	20.727	By MS/MS	By MS/MS	5.5	5.5	115770000	32536000	83231000	4134500	1162000	2972500	33475000	54663000	1	2	3				359	895;2287	True;True	958;2433	2356;2357;6231;6232;6233	2050;5538;5539
Q60605	Q60605	2	2	2	Myosin light polypeptide 6	Myl6	sp|Q60605|MYL6_MOUSE Myosin light polypeptide 6 OS=Mus musculus OX=10090 GN=Myl6 PE=1 SV=3	1	2	2	2	2	2	2	2	2	2	20.5	20.5	20.5	16.93	151	151	0	20.6	By MS/MS	By MS/MS	20.5	20.5	62146000	12928000	49218000	6214600	1292800	4921800	12593000	31730000	1	2	3				360	3028;4333	True;True	3252;4631;4632	8382;8383;11955;11956;11957;11958	7480;10601;10602
Q60668	Q60668	2	2	2	Heterogeneous nuclear ribonucleoprotein D0	Hnrnpd	sp|Q60668|HNRPD_MOUSE Heterogeneous nuclear ribonucleoprotein D0 OS=Mus musculus OX=10090 GN=Hnrnpd PE=1 SV=2	1	2	2	2	1	2	1	2	1	2	6.8	6.8	6.8	38.354	355	355	0	14.385	By matching	By MS/MS	2.8	6.8	132460000	35890000	96568000	10189000	2760700	7428300	0	52179000	0	3	3				361	1132;1825	True;True	1202;1942	2919;2920;2921;2922;4820	2563;2564;4261
Q60692	Q60692	3	3	3	Proteasome subunit beta type-6	Psmb6	sp|Q60692|PSB6_MOUSE Proteasome subunit beta type-6 OS=Mus musculus OX=10090 GN=Psmb6 PE=1 SV=3	1	3	3	3	3	3	3	3	3	3	12.2	12.2	12.2	25.378	238	238	0	17.318	By matching	By MS/MS	12.2	12.2	128760000	38177000	90587000	11706000	3470600	8235200	38291000	60404000	0	3	3				362	1251;3331;4080	True;True;True	1338;3575;4366	3254;3255;9166;9167;11279;11280	2851;8150;9994
Q60737	Q60737	3	3	3	Casein kinase II subunit alpha	Csnk2a1	sp|Q60737|CSK21_MOUSE Casein kinase II subunit alpha OS=Mus musculus OX=10090 GN=Csnk2a1 PE=1 SV=2	1	3	3	3	3	3	3	3	3	3	13.6	13.6	13.6	45.133	391	391	0	22.358	By MS/MS	By MS/MS	13.6	13.6	118420000	47251000	71165000	6578700	2625000	3953600	46092000	48701000	2	4	6				363	1271;1395;4020	True;True;True	1360;1488;4301	3322;3323;3624;3625;3626;3627;11107;11108	2916;3166;3167;3168;3169;9841
Q60864	Q60864	3	3	3	Stress-induced-phosphoprotein 1	Stip1	sp|Q60864|STIP1_MOUSE Stress-induced-phosphoprotein 1 OS=Mus musculus OX=10090 GN=Stip1 PE=1 SV=1	1	3	3	3	3	3	3	3	3	3	7.7	7.7	7.7	62.581	543	543	0	23.336	By MS/MS	By MS/MS	7.7	7.7	45872000	10768000	35104000	1349200	316720	1032500	11299000	22921000	1	3	4				364	287;2365;2641	True;True;True	313;2517;2809	783;784;6461;6462;7187;7188	676;5740;5741;6450
Q8BMJ3;Q60872	Q8BMJ3;Q60872	3;3	3;3	3;3	Eukaryotic translation initiation factor 1A, X-chromosomal;Eukaryotic translation initiation factor 1A	Eif1ax;Eif1a	sp|Q8BMJ3|IF1AX_MOUSE Eukaryotic translation initiation factor 1A, X-chromosomal OS=Mus musculus OX=10090 GN=Eif1ax PE=2 SV=3;sp|Q60872|IF1A_MOUSE Eukaryotic translation initiation factor 1A OS=Mus musculus OX=10090 GN=Eif1a PE=2 SV=3	2	3	3	3	2	3	2	3	2	3	19.4	19.4	19.4	16.46	144	144;144	0	37.236	By matching	By MS/MS	19.4	19.4	143000000	32668000	110330000	20429000	4666800	15762000	28035000	78341000	0	4	4				365	765;815;972	True;True;True	819;873;1036	2034;2035;2162;2557;2558;2559;2560	1769;1882;2225;2226
Q60930	Q60930	9	9	9	Voltage-dependent anion-selective channel protein 2	Vdac2	sp|Q60930|VDAC2_MOUSE Voltage-dependent anion-selective channel protein 2 OS=Mus musculus OX=10090 GN=Vdac2 PE=1 SV=2	1	9	9	9	3	9	3	9	3	9	43.7	43.7	43.7	31.732	295	295	0	136.77	By MS/MS	By MS/MS	13.6	43.7	568660000	68773000	499880000	35541000	4298300	31243000	86408000	316310000	1	10	11				366	2773;2774;3480;3667;3895;4411;4569;4592;4732	True;True;True;True;True;True;True;True;True	2950;2951;3734;3937;4173;4716;4881;4904;5056	7531;7532;9635;10154;10155;10769;12163;12164;12165;12166;12548;12593;12928;12929	6735;6736;8549;8997;9513;10787;10788;10789;10790;11130;11167;11462
Q60931	Q60931	6	6	6	Voltage-dependent anion-selective channel protein 3	Vdac3	sp|Q60931|VDAC3_MOUSE Voltage-dependent anion-selective channel protein 3 OS=Mus musculus OX=10090 GN=Vdac3 PE=1 SV=1	1	6	6	6	3	6	3	6	3	6	30.7	30.7	30.7	30.752	283	283	0	121.85	By matching	By MS/MS	8.8	30.7	857800000	30005000	827790000	61271000	2143200	59128000	62655000	520360000	0	8	8				367	5;2752;2784;2785;3479;4410	True;True;True;True;True;True	5;2929;2961;2962;3733;4715	6;7479;7480;7559;7560;7561;7562;7563;7564;9634;12161;12162	5;6696;6760;6761;6762;8548;10785;10786
Q60932	Q60932	9	9	9	Voltage-dependent anion-selective channel protein 1	Vdac1	sp|Q60932|VDAC1_MOUSE Voltage-dependent anion-selective channel protein 1 OS=Mus musculus OX=10090 GN=Vdac1 PE=1 SV=3	1	9	9	9	6	9	6	9	6	9	46.3	46.3	46.3	32.351	296	296	0	123.78	By MS/MS	By MS/MS	27.4	46.3	719460000	75588000	643880000	42321000	4446300	37875000	94174000	358150000	3	10	13				368	2193;2772;2787;3503;3849;4500;4593;4601;4733	True;True;True;True;True;True;True;True;True	2333;2949;2964;3763;4122;4810;4905;4914;5057	5908;7529;7530;7567;7568;7569;7570;7571;9713;10615;10616;12384;12385;12594;12620;12621;12930;12931	5258;6734;6764;6765;6766;8612;9383;10982;10983;11168;11191;11192;11463;11464
Q61029;Q61033	Q61029;Q61033	5;3	5;3	5;3	Lamina-associated polypeptide 2, isoforms beta/delta/epsilon/gamma;Lamina-associated polypeptide 2, isoforms alpha/zeta	Tmpo	sp|Q61029|LAP2B_MOUSE Lamina-associated polypeptide 2, isoforms beta/delta/epsilon/gamma OS=Mus musculus OX=10090 GN=Tmpo PE=1 SV=4;sp|Q61033|LAP2A_MOUSE Lamina-associated polypeptide 2, isoforms alpha/zeta OS=Mus musculus OX=10090 GN=Tmpo PE=1 SV=4	2	5	5	5	4	4	4	4	4	4	19.9	19.9	19.9	50.372	452	452;693	0	68.417	By MS/MS	By MS/MS	14.4	17.3	164630000	51706000	112930000	7839700	2462200	5377500	60609000	66539000	2	4	6				369	1293;1531;1777;2409;3169	True;True;True;True;True	1382;1630;1893;2564;3405	3379;3380;3980;4689;4690;6567;6568;8762	2966;3485;4139;4140;5833;5834;7798
Q61171	Q61171	3	3	3	Peroxiredoxin-2	Prdx2	sp|Q61171|PRDX2_MOUSE Peroxiredoxin-2 OS=Mus musculus OX=10090 GN=Prdx2 PE=1 SV=3	1	3	3	3	1	3	1	3	1	3	26.3	26.3	26.3	21.778	198	198	0	51.776	By matching	By MS/MS	9.1	26.3	228010000	3765300	224250000	17540000	289640	17250000	0	149810000	0	4	4				370	2112;2456;3648	True;True;True	2248;2614;3917	5665;5666;5667;6676;10100	5036;5037;5935;8950
Q61316	Q61316	3	3	3	Heat shock 70 kDa protein 4	Hspa4	sp|Q61316|HSP74_MOUSE Heat shock 70 kDa protein 4 OS=Mus musculus OX=10090 GN=Hspa4 PE=1 SV=1	1	3	3	3	3	3	3	3	3	3	5.4	5.4	5.4	94.132	841	841	0	21.338	By MS/MS	By MS/MS	5.4	5.4	62367000	19727000	42640000	1247300	394540	852790	19501000	28712000	3	2	5				371	158;3670;4326	True;True;True	169;3940;4624	413;414;10162;10163;11939;11940	358;359;9002;9003;10586;10587
Q61495;Q7TSF1;Q7TSF0	Q61495;Q7TSF1;Q7TSF0	2;2;1	2;2;1	2;2;1	Desmoglein-1-alpha;Desmoglein-1-beta;Desmoglein-1-gamma	Dsg1a;Dsg1b;Dsg1c	sp|Q61495|DSG1A_MOUSE Desmoglein-1-alpha OS=Mus musculus OX=10090 GN=Dsg1a PE=2 SV=2;sp|Q7TSF1|DSG1B_MOUSE Desmoglein-1-beta OS=Mus musculus OX=10090 GN=Dsg1b PE=1 SV=1;sp|Q7TSF0|DSG1C_MOUSE Desmoglein-1-gamma OS=Mus musculus OX=10090 GN=Dsg1c PE=1 SV=1	3	2	2	2	2	1	2	1	2	1	2.6	2.6	2.6	114.6	1057	1057;1060;911	0	12.278	By MS/MS	By MS/MS	2.6	1	31085000	22754000	8330800	758170	554980	203190	22754000	0	1	1	2				372	1065;1890	True;True	1134;2009	2761;2762;5002	2399;2400;4414
Q61545	Q61545	3	3	3	RNA-binding protein EWS	Ewsr1	sp|Q61545|EWS_MOUSE RNA-binding protein EWS OS=Mus musculus OX=10090 GN=Ewsr1 PE=1 SV=2	1	3	3	3	0	3	0	3	0	3	4.4	4.4	4.4	68.461	655	655	0	21.43		By MS/MS	0	4.4	187580000	0	187580000	11034000	0	11034000	0	125310000	0	3	3				373	44;45;1327	True;True;True	46;47;1418	97;98;99;3471	81;82;83;3041
Q61598;P50397;P50396	Q61598;P50397	3;2;1	3;2;1	3;2;1	Rab GDP dissociation inhibitor beta	Gdi2	sp|Q61598|GDIB_MOUSE Rab GDP dissociation inhibitor beta OS=Mus musculus OX=10090 GN=Gdi2 PE=1 SV=1;sp|P50397|GDIB_BOVIN Rab GDP dissociation inhibitor beta OS=Bos taurus OX=9913 GN=GDI2 PE=2 SV=3	3	3	3	3	2	3	2	3	2	3	8.8	8.8	8.8	50.537	445	445;445;447	0	20.273	By matching	By MS/MS	6.7	8.8	31296000	3387900	27908000	1117700	121000	996710	3485300	18547000	0	4	4				374	1279;2918;3696	True;True;True	1368;3118;3967	3342;3343;8020;10221;10222	2932;7158;9048;9049
Q61656	Q61656	18	18	12	Probable ATP-dependent RNA helicase DDX5	Ddx5	sp|Q61656|DDX5_MOUSE Probable ATP-dependent RNA helicase DDX5 OS=Mus musculus OX=10090 GN=Ddx5 PE=1 SV=2	1	18	18	12	16	18	16	18	10	12	38.3	38.3	27.5	69.289	614	614	0	158.63	By MS/MS	By MS/MS	29.6	38.3	2727800000	1243200000	1484600000	85242000	38850000	46393000	1260800000	974130000	13	17	30				375	330;750;916;1274;1328;1593;1627;2041;2510;2623;2914;3195;3290;3333;3757;3994;4081;4591	True;True;True;True;True;True;True;True;True;True;True;True;True;True;True;True;True;True	359;804;979;1363;1419;1694;1729;2172;2671;2789;3113;3432;3532;3577;4029;4275;4367;4903	900;901;1988;1989;2411;2412;3328;3329;3330;3331;3472;3473;4127;4128;4195;4196;5463;5464;6808;6809;7144;7145;8009;8010;8815;9064;9170;9171;10401;10402;11014;11015;11281;11282;12591;12592	771;772;1723;1724;2099;2100;2920;2921;2922;3042;3609;3668;4845;4846;6049;6050;6412;6413;7150;7848;8064;8153;8154;9206;9207;9742;9743;9995;9996;11166
Q61699	Q61699	2	2	2	Heat shock protein 105 kDa	Hsph1	sp|Q61699|HS105_MOUSE Heat shock protein 105 kDa OS=Mus musculus OX=10090 GN=Hsph1 PE=1 SV=2	1	2	2	2	2	2	2	2	2	2	3.3	3.3	3.3	96.406	858	858	0	18.023	By MS/MS	By MS/MS	3.3	3.3	32804000	15802000	17002000	713120	343520	369600	15226000	11934000	1	2	3				376	3783;4355	True;True	4055;4654	10472;10473;12014;12015	9263;10663;10664
Q61733	Q61733	3	3	3	28S ribosomal protein S31, mitochondrial	Mrps31	sp|Q61733|RT31_MOUSE 28S ribosomal protein S31, mitochondrial OS=Mus musculus OX=10090 GN=Mrps31 PE=1 SV=1	1	3	3	3	1	3	1	3	1	3	16.7	16.7	16.7	43.88	384	384	0	21.408	By matching	By MS/MS	2.6	16.7	33519000	7934100	25584000	1523600	360640	1162900	0	17092000	0	3	3				377	2857;2986;3284	True;True;True	3040;3206;3525	7821;8240;9047;9048	6986;7343;8053
Q61879	Q61879	20	20	14	Myosin-10	Myh10	sp|Q61879|MYH10_MOUSE Myosin-10 OS=Mus musculus OX=10090 GN=Myh10 PE=1 SV=2	1	20	20	14	14	20	14	20	10	14	14	14	10.5	228.99	1976	1976	0	211.41	By MS/MS	By MS/MS	9.8	14	673990000	227380000	446610000	6607800	2229200	4378600	159060000	366680000	2	18	20				378	66;176;253;447;512;923;997;1846;2120;2240;2275;2392;2713;2852;3221;3281;3609;4038;4073;4540	True;True;True;True;True;True;True;True;True;True;True;True;True;True;True;True;True;True;True;True	68;190;276;483;552;986;1065;1963;2256;2383;2421;2546;2890;3035;3460;3522;3878;4320;4359;4851	143;144;465;705;706;1176;1177;1336;1337;2426;2427;2608;2609;4871;4872;5686;5687;6067;6068;6205;6206;6524;6525;7382;7804;8882;9042;9043;10011;10012;11148;11260;11261;12468;12469	127;405;620;1019;1158;1159;2111;2268;4301;5054;5393;5516;5792;6615;6971;7905;8049;8050;8867;8868;9874;9976;11053
Q61881	Q61881	2	2	2	DNA replication licensing factor MCM7	Mcm7	sp|Q61881|MCM7_MOUSE DNA replication licensing factor MCM7 OS=Mus musculus OX=10090 GN=Mcm7 PE=1 SV=1	1	2	2	2	2	2	2	2	2	2	4.6	4.6	4.6	81.21	719	719	0	10.607	By matching	By MS/MS	4.6	4.6	13215000	5178500	8037000	357180	139960	217220	0	5369200	0	0	0				379	1762;2434	True;True	1878;2590	4659;4660;6627;6628	4117;5891
Q61937	Q61937	5	5	5	Nucleophosmin	Npm1	sp|Q61937|NPM_MOUSE Nucleophosmin OS=Mus musculus OX=10090 GN=Npm1 PE=1 SV=1	1	5	5	5	4	5	4	5	4	5	27.1	27.1	27.1	32.56	292	292	0	61.581	By MS/MS	By MS/MS	17.5	27.1	385950000	97958000	287990000	32162000	8163200	23999000	94227000	196120000	3	8	11				380	79;1532;2944;4103;4184	True;True;True;True;True	82;1631;3158;4391;4477	191;192;3981;3982;3983;3984;8115;8116;8117;8118;11344;11573;11574;11575;11576	166;3486;3487;3488;7237;7238;7239;7240;10056;10265;10266
Q61990	Q61990	3	2	2	Poly(rC)-binding protein 2	Pcbp2	sp|Q61990|PCBP2_MOUSE Poly(rC)-binding protein 2 OS=Mus musculus OX=10090 GN=Pcbp2 PE=1 SV=1	1	3	2	2	3	3	2	2	2	2	11	8	8	38.221	362	362	0	14.879	By MS/MS	By MS/MS	11	11	111250000	37409000	73845000	6544400	2200600	4343800	34964000	51777000	1	2	3				381	214;1897;1963	True;True;False	234;2017;2088	596;597;5027;5028;5249;5250	528;529;4445;4446;4653
Q62036	Q62036	2	2	2	Centrosomal protein of 131 kDa	Cep131	sp|Q62036|CP131_MOUSE Centrosomal protein of 131 kDa OS=Mus musculus OX=10090 GN=Cep131 PE=1 SV=2	1	2	2	2	1	2	1	2	1	2	3	3	3	120.31	1060	1060	0	11.146	By matching	By MS/MS	1	3	15807000	1497000	14310000	263450	24950	238500	0	9559900	0	1	1				382	412;1449	True;True	446;1543	1086;1087;3753	942;3276
Q62093	Q62093	4	4	4	Serine/arginine-rich splicing factor 2	Srsf2	sp|Q62093|SRSF2_MOUSE Serine/arginine-rich splicing factor 2 OS=Mus musculus OX=10090 GN=Srsf2 PE=1 SV=4	1	4	4	4	1	4	1	4	1	4	21.7	21.7	21.7	25.476	221	221	0	36.532	By matching	By MS/MS	3.6	21.7	465250000	23230000	442020000	51695000	2581100	49113000	0	295300000	0	5	5				383	516;3814;4185;4239	True;True;True;True	556;4087;4478;4533	1342;10537;11577;11716;11717	1164;1165;9313;10267;10388
Q62186;P51571	Q62186	3;1	3;1	3;1	Translocon-associated protein subunit delta	Ssr4	sp|Q62186|SSRD_MOUSE Translocon-associated protein subunit delta OS=Mus musculus OX=10090 GN=Ssr4 PE=1 SV=1	2	3	3	3	3	3	3	3	3	3	23.3	23.3	23.3	18.936	172	172;173	0	19.946	By MS/MS	By MS/MS	23.3	23.3	133640000	34229000	99407000	22273000	5704800	16568000	29417000	71222000	1	2	3				384	1124;3083;4735	True;True;True	1194;3310;5059	2896;2897;8531;8532;12933;12934	2529;2530;7607;11466
Q62318	Q62318	6	6	6	Transcription intermediary factor 1-beta	Trim28	sp|Q62318|TIF1B_MOUSE Transcription intermediary factor 1-beta OS=Mus musculus OX=10090 GN=Trim28 PE=1 SV=3	1	6	6	6	4	6	4	6	4	6	13.7	13.7	13.7	88.846	834	834	0	80.204	By MS/MS	By MS/MS	10.1	13.7	179430000	41212000	138220000	5437400	1248800	4188500	45660000	87892000	2	6	8				385	36;593;1092;2749;2768;4230	True;True;True;True;True;True	38;637;1161;2926;2945;4524	78;79;1549;2823;7473;7474;7522;7523;11689;11690	65;66;67;1343;2455;6692;6729;10362
Q62351	Q62351	5	5	5	Transferrin receptor protein 1	Tfrc	sp|Q62351|TFR1_MOUSE Transferrin receptor protein 1 OS=Mus musculus OX=10090 GN=Tfrc PE=1 SV=1	1	5	5	5	3	5	3	5	3	5	8	8	8	85.73	763	763	0	43.768	By MS/MS	By MS/MS	5	8	190190000	31693000	158490000	5004900	834040	4170900	45405000	92170000	1	5	6				386	1941;2417;3457;4214;4466	True;True;True;True;True	2063;2572;3710;4508;4774	5158;5159;6581;9581;9582;11644;11645;12310;12311	4553;5845;8496;8497;10321;10322;10921
Q64012;Q9UKM9	Q64012	10;4	10;4	10;4	RNA-binding protein Raly	Raly	sp|Q64012|RALY_MOUSE RNA-binding protein Raly OS=Mus musculus OX=10090 GN=Raly PE=1 SV=3	2	10	10	10	10	10	10	10	10	10	36.2	36.2	36.2	33.188	312	312;306	0	95.277	By MS/MS	By MS/MS	36.2	36.2	1181200000	380410000	800770000	69481000	22377000	47104000	358720000	556650000	5	9	14				387	2252;2420;2673;2750;3668;3732;3873;4222;4322;4507	True;True;True;True;True;True;True;True;True;True	2397;2575;2850;2927;3938;4004;4148;4516;4620;4817	6132;6133;6586;6587;7305;7306;7307;7308;7475;7476;10156;10157;10327;10328;10700;10701;11674;11675;11932;11933;12397;12398	5451;5452;5850;6551;6552;6693;8998;8999;9139;9462;10349;10350;10581;10993;10994
Q64152	Q64152	3	3	3	Transcription factor BTF3	Btf3	sp|Q64152|BTF3_MOUSE Transcription factor BTF3 OS=Mus musculus OX=10090 GN=Btf3 PE=1 SV=3	1	3	3	3	2	3	2	3	2	3	37.3	37.3	37.3	22.031	204	204	0	80.596	By MS/MS	By MS/MS	23.5	37.3	408080000	74996000	333080000	45342000	8332900	37009000	80685000	216830000	2	4	6				388	333;2487;4443	True;True;True	362;2647;4748	916;917;6745;12242;12243;12244;12245	791;792;5994;10865;10866;10867
Q64337	Q64337	3	3	3	Sequestosome-1	Sqstm1	sp|Q64337|SQSTM_MOUSE Sequestosome-1 OS=Mus musculus OX=10090 GN=Sqstm1 PE=1 SV=1	1	3	3	3	3	0	3	0	3	0	13.3	13.3	13.3	48.162	442	442	0	22.766	By MS/MS		13.3	0	41758000	41758000	0	2319900	2319900	0	41758000	0	3	0	3				389	148;2515;3157	True;True;True	159;2676;3393	396;6825;8728	344;6073;7766
Q64364	Q64364	2	2	2	Tumor suppressor ARF	Cdkn2a	sp|Q64364|ARF_MOUSE Tumor suppressor ARF OS=Mus musculus OX=10090 GN=Cdkn2a PE=1 SV=1	1	2	2	2	1	2	1	2	1	2	14.8	14.8	14.8	19.238	169	169	0	11.807	By matching	By MS/MS	6.5	14.8	89097000	33046000	56051000	9899700	3671800	6227800	0	37445000	0	3	3				390	1526;3831	True;True	1625;4104	3963;3964;3965;3966;10572;10573	3473;3474;9342;9343
Q68FD5;Q0WLB5;Q0WNJ6	Q68FD5	39;1;1	39;1;1	39;1;1	Clathrin heavy chain 1	Cltc	sp|Q68FD5|CLH1_MOUSE Clathrin heavy chain 1 OS=Mus musculus OX=10090 GN=Cltc PE=1 SV=3	3	39	39	39	21	39	21	39	21	39	31	31	31	191.55	1675	1675;1703;1705	0	323.31	By MS/MS	By MS/MS	16.9	31	1853000000	247350000	1605600000	20589000	2748300	17840000	331560000	980140000	7	42	49				391	135;183;251;352;500;864;1025;1047;1538;1540;1635;1726;1746;1856;2006;2066;2102;2121;2127;2291;2350;2493;2613;2640;3064;3087;3091;3282;3389;3790;4055;4145;4241;4257;4295;4479;4588;4589;4668	True;True;True;True;True;True;True;True;True;True;True;True;True;True;True;True;True;True;True;True;True;True;True;True;True;True;True;True;True;True;True;True;True;True;True;True;True;True;True	146;197;274;383;540;925;1094;1116;1637;1639;1737;1839;1861;1973;2134;2198;2236;2257;2263;2437;2500;2654;2777;2808;3289;3314;3318;3523;3637;4062;4337;4436;4535;4551;4591;4787;4900;4901;4985	365;484;485;699;700;701;702;953;954;1309;1310;2263;2686;2727;3994;3997;3998;4212;4213;4546;4600;4601;4900;4901;4902;4903;5370;5539;5634;5688;5689;5690;5707;5708;5709;5710;6242;6398;6399;6400;6401;6402;6766;6767;7112;7113;7185;7186;8485;8486;8537;8538;8546;8547;9044;9045;9369;9370;10487;10488;10489;11183;11184;11185;11446;11720;11753;11754;11854;12339;12587;12588;12769	316;425;616;617;618;824;825;1137;1970;2338;2368;3497;3500;3679;4005;4046;4323;4324;4762;4917;5007;5055;5056;5072;5073;5547;5680;5681;5682;6012;6384;6385;6449;7567;7611;7612;7618;7619;8051;8313;9274;9275;9276;9904;9905;9906;10144;10391;10421;10507;10944;11162;11163;11315
Q6A0A2	Q6A0A2	13	13	13	La-related protein 4B	Larp4b	sp|Q6A0A2|LAR4B_MOUSE La-related protein 4B OS=Mus musculus OX=10090 GN=Larp4b PE=1 SV=2	1	13	13	13	10	13	10	13	10	13	22.4	22.4	22.4	81.626	741	741	0	185.21	By MS/MS	By MS/MS	15	22.4	1197100000	376560000	820510000	35208000	11075000	24133000	413530000	511180000	5	14	19				392	982;995;1035;1524;1992;2230;2690;2757;3067;3642;3645;3863;3967	True;True;True;True;True;True;True;True;True;True;True;True;True	1047;1063;1104;1623;2120;2373;2867;2934;3292;3911;3914;4138;4247	2577;2605;2606;2706;3958;3959;3960;3961;5337;5338;6043;6044;6045;6046;7336;7337;7488;7489;8492;10090;10091;10095;10096;10672;10673;10950;10951	2240;2265;2266;2352;3470;3471;4736;5374;5375;5376;6577;6702;6703;7572;8942;8943;8946;9431;9432;9692
Q6A0A9;Q9NZB2	Q6A0A9;Q9NZB2	6;4	6;4	6;4	Constitutive coactivator of PPAR-gamma-like protein 1	FAM120A	sp|Q6A0A9|F120A_MOUSE Constitutive coactivator of PPAR-gamma-like protein 1 OS=Mus musculus OX=10090 GN=FAM120A PE=1 SV=2;sp|Q9NZB2|F120A_HUMAN Constitutive coactivator of PPAR-gamma-like protein 1 OS=Homo sapiens OX=9606 GN=FAM120A PE=1 SV=2	2	6	6	6	4	6	4	6	4	6	7.8	7.8	7.8	121.64	1112	1112;1118	0	39.284	By MS/MS	By MS/MS	4.8	7.8	120030000	27439000	92594000	2105900	481390	1624500	37945000	51352000	1	5	6				393	769;2688;3342;3429;3690;3703	True;True;True;True;True;True	824;2865;3586;3681;3961;3975	2044;2045;7332;7333;9196;9493;9494;10207;10208;10209;10210;10244	1775;6574;8176;8414;9038;9039;9071
Q6DFW4	Q6DFW4	6	6	6	Nucleolar protein 58	Nop58	sp|Q6DFW4|NOP58_MOUSE Nucleolar protein 58 OS=Mus musculus OX=10090 GN=Nop58 PE=1 SV=1	1	6	6	6	4	6	4	6	4	6	15.5	15.5	15.5	60.342	536	536	0	40.262	By MS/MS	By MS/MS	9.7	15.5	210610000	63974000	146640000	9157000	2781500	6375600	71577000	90359000	2	6	8				394	1220;1630;1892;2505;3708;4657	True;True;True;True;True;True	1307;1732;2011;2666;3980;4974	3193;3194;4201;4202;5005;5006;6796;6797;10255;12748;12749	2801;2802;3671;4416;4417;6038;6039;9081;11300
Q6GQT9	Q6GQT9	2	2	2	Nodal modulator 1	Nomo1	sp|Q6GQT9|NOMO1_MOUSE Nodal modulator 1 OS=Mus musculus OX=10090 GN=Nomo1 PE=1 SV=1	1	2	2	2	2	2	2	2	2	2	2.3	2.3	2.3	133.42	1214	1214	0	11.666	By MS/MS	By MS/MS	2.3	2.3	23928000	9329600	14599000	351890	137200	214690	8674800	10408000	2	1	3				395	1806;4454	True;True	1923;4759	4782;4783;12268;12269	4228;10887;10888
Q6NZQ2	Q6NZQ2	6	6	6		Ddx31	sp|Q6NZQ2|DDX31_MOUSE Probable ATP-dependent RNA helicase DDX31 OS=Mus musculus OX=10090 GN=Ddx31 PE=2 SV=2	1	6	6	6	5	6	5	6	5	6	13.7	13.7	13.7	76.912	687	687	0	49.754	By MS/MS	By MS/MS	9.9	13.7	131220000	68134000	63087000	3749200	1946700	1802500	74351000	35929000	4	3	7				396	264;426;1044;3090;3313;3959	True;True;True;True;True;True	287;460;1113;3317;3556;4239	729;730;1115;1116;2722;8544;8545;9126;9127;10935;10936	639;640;964;965;2364;7617;8116;9682;9683
Q6P1B1	Q6P1B1	2	2	2	Xaa-Pro aminopeptidase 1	Xpnpep1	sp|Q6P1B1|XPP1_MOUSE Xaa-Pro aminopeptidase 1 OS=Mus musculus OX=10090 GN=Xpnpep1 PE=1 SV=1	1	2	2	2	2	2	2	2	2	2	4.3	4.3	4.3	69.59	623	623	0	12.233	By MS/MS	By MS/MS	4.3	4.3	60659000	23759000	36900000	1784100	698780	1085300	0	24652000	1	1	2				397	1565;1805	True;True	1665;1922	4057;4058;4780;4781	3548;3549;4227
Q6P4T2	Q6P4T2	4	4	4	U5 small nuclear ribonucleoprotein 200 kDa helicase	Snrnp200	sp|Q6P4T2|U520_MOUSE U5 small nuclear ribonucleoprotein 200 kDa helicase OS=Mus musculus OX=10090 GN=Snrnp200 PE=1 SV=1	1	4	4	4	4	4	4	4	4	4	2	2	2	244.54	2136	2136	0	23.185	By MS/MS	By MS/MS	2	2	58421000	23993000	34428000	495090	203330	291760	21171000	25822000	3	2	5				398	596;711;2767;4620	True;True;True;True	640;765;2944;4935	1554;1555;1886;1887;7520;7521;12669;12670	1348;1349;1639;6728;11231
Q6P5B0;REV__Q9SZR1	Q6P5B0	5;1	5;1	5;1	RRP12-like protein	Rrp12	sp|Q6P5B0|RRP12_MOUSE RRP12-like protein OS=Mus musculus OX=10090 GN=Rrp12 PE=1 SV=1	2	5	5	5	4	4	4	4	4	4	5.1	5.1	5.1	143.13	1295	1295;1069	0	34.419	By MS/MS	By MS/MS	3.3	4	124550000	92591000	31955000	1831500	1361600	469920	88731000	25207000	4	3	7				399	856;2498;3001;3807;3974	True;True;True;True;True	917;2659;3223;4079;4254	2248;6777;6778;8285;8286;10516;10517;10966;10967	1958;6021;7390;7391;9297;9298;9705
Q6PDM2	Q6PDM2	6	6	6	Serine/arginine-rich splicing factor 1	Srsf1	sp|Q6PDM2|SRSF1_MOUSE Serine/arginine-rich splicing factor 1 OS=Mus musculus OX=10090 GN=Srsf1 PE=1 SV=3	1	6	6	6	5	6	5	6	5	6	27	27	27	27.744	248	248	0	42.039	By matching	By MS/MS	21.4	27	252340000	51870000	200470000	19410000	3990000	15420000	58105000	127690000	0	7	7				400	582;782;1396;2071;3549;3946	True;True;True;True;True;True	624;838;1489;2203;3815;4225	1522;1523;2068;2069;3628;5547;5548;9833;9834;9835;10901;10902	1323;1794;3170;4925;8715;8716;9654
Q6PFR5	Q6PFR5	2	2	2	Transformer-2 protein homolog alpha	Tra2a	sp|Q6PFR5|TRA2A_MOUSE Transformer-2 protein homolog alpha OS=Mus musculus OX=10090 GN=Tra2a PE=1 SV=1	1	2	2	2	0	2	0	2	0	2	12.5	12.5	12.5	32.316	281	281	0	14.408		By MS/MS	0	12.5	63187000	0	63187000	4513300	0	4513300	0	42212000	0	3	3				401	316;4660	True;True	344;4977	861;862;12754	742;743;11303
Q6PGG6	Q6PGG6	2	2	2	Guanine nucleotide-binding protein-like 3-like protein	Gnl3l	sp|Q6PGG6|GNL3L_MOUSE Guanine nucleotide-binding protein-like 3-like protein OS=Mus musculus OX=10090 GN=Gnl3l PE=1 SV=1	1	2	2	2	2	1	2	1	2	1	5.5	5.5	5.5	65.194	577	577	0	18.907	By MS/MS	By matching	5.5	3.1	10011000	7986500	2024300	322930	257630	65299	0	1352300	2	0	2				402	1924;2320	True;True	2045;2467	5122;5123;6316	4523;5619
Q6PGH1	Q6PGH1	2	2	2	Protein BUD31 homolog	Bud31	sp|Q6PGH1|BUD31_MOUSE Protein BUD31 homolog OS=Mus musculus OX=10090 GN=Bud31 PE=1 SV=2	1	2	2	2	0	2	0	2	0	2	6.9	6.9	6.9	17	144	144	0	11.388		By MS/MS	0	6.9	5528900	0	5528900	691110	0	691110	0	3693600	0	2	2				403	2278;4210	True;True	2424;4503	6211;11634	5520;10312
Q6ZQ08;A5YKK6	Q6ZQ08;A5YKK6	14;13	14;13	14;13	CCR4-NOT transcription complex subunit 1	Cnot1;CNOT1	sp|Q6ZQ08|CNOT1_MOUSE CCR4-NOT transcription complex subunit 1 OS=Mus musculus OX=10090 GN=Cnot1 PE=1 SV=2;sp|A5YKK6|CNOT1_HUMAN CCR4-NOT transcription complex subunit 1 OS=Homo sapiens OX=9606 GN=CNOT1 PE=1 SV=2	2	14	14	14	11	13	11	13	11	13	7.5	7.5	7.5	266.8	2375	2375;2376	0	93.202	By MS/MS	By MS/MS	5.8	6.9	321510000	120940000	200570000	2635400	991310	1644000	125640000	129300000	8	11	19				404	440;878;990;1301;1468;1501;1544;2044;2674;3053;3608;3628;3695;4623	True;True;True;True;True;True;True;True;True;True;True;True;True;True	476;941;1057;1390;1562;1599;1644;2175;2851;3278;3877;3897;3966;4938	1157;1158;2305;2595;3399;3400;3824;3902;3903;4015;4016;5468;5469;7309;8459;8460;10009;10010;10064;10065;10219;10220;12676;12677	1002;2005;2257;2983;3354;3420;3514;4849;4850;6553;7544;7545;8865;8866;8917;8918;9046;9047;11237
Q6ZQ38	Q6ZQ38	2	2	2	Cullin-associated NEDD8-dissociated protein 1	Cand1	sp|Q6ZQ38|CAND1_MOUSE Cullin-associated NEDD8-dissociated protein 1 OS=Mus musculus OX=10090 GN=Cand1 PE=1 SV=2	1	2	2	2	1	2	1	2	1	2	2	2	2	136.33	1230	1230	0	10.998	By matching	By MS/MS	1	2	12954000	2195100	10759000	208930	35404	173530	0	7187500	0	1	1				405	2484;2786	True;True	2644;2963	6742;7565;7566	5991;6763
Q6ZQ58;Q9VAW5	Q6ZQ58	23;2	23;2	23;2	La-related protein 1	Larp1	sp|Q6ZQ58|LARP1_MOUSE La-related protein 1 OS=Mus musculus OX=10090 GN=Larp1 PE=1 SV=3	2	23	23	23	18	23	18	23	18	23	32.8	32.8	32.8	121.12	1072	1072;1673	0	214.78	By MS/MS	By MS/MS	24.5	32.8	1108200000	358560000	749640000	19107000	6182000	12925000	370750000	455540000	12	23	35				406	420;570;999;1233;1282;1484;1559;1931;2175;2348;2473;2698;3046;3168;4206;4237;4292;4293;4442;4603;4607;4654;4779	True;True;True;True;True;True;True;True;True;True;True;True;True;True;True;True;True;True;True;True;True;True;True	454;611;1067;1320;1371;1578;1659;2052;2315;2498;2631;2632;2875;3271;3404;4499;4531;4588;4589;4747;4916;4920;4921;4971;5104	1104;1105;1490;1491;2612;2613;3218;3352;3353;3855;4044;5137;5138;5859;5860;6393;6394;6395;6718;6719;6720;6721;7347;7348;8441;8442;8760;8761;11623;11624;11625;11626;11712;11713;11849;11850;11851;12241;12624;12625;12632;12633;12634;12742;12743;13037;13038	955;956;1297;2270;2271;2822;2939;2940;3382;3536;4536;4537;5215;5216;5677;5678;5974;5975;5976;5977;6587;7527;7796;7797;10306;10307;10385;10386;10503;10504;10864;11195;11199;11200;11201;11295;11296;11562;11563
Q6ZWN5;Q9FLF0	Q6ZWN5	22;1	22;1	22;1	40S ribosomal protein S9	Rps9	sp|Q6ZWN5|RS9_MOUSE 40S ribosomal protein S9 OS=Mus musculus OX=10090 GN=Rps9 PE=1 SV=3	2	22	22	22	22	22	22	22	22	22	52.6	52.6	52.6	22.591	194	194;197	0	216.45	By MS/MS	By MS/MS	52.6	52.6	170460000000	75574000000	94886000000	15496000000	6870400000	8626000000	76302000000	61038000000	41	43	84				407	952;953;954;1664;1785;1786;1853;1854;2245;2399;2404;2426;2427;2516;2721;2909;3336;3397;3398;3404;3721;4313	True;True;True;True;True;True;True;True;True;True;True;True;True;True;True;True;True;True;True;True;True;True	1016;1017;1018;1768;1901;1902;1970;1971;2389;2554;2559;2582;2583;2677;2898;3104;3105;3580;3645;3646;3652;3993;4611	2499;2500;2501;2502;2503;2504;2505;2506;2507;2508;2509;2510;2511;2512;2513;2514;2515;4308;4309;4704;4705;4706;4707;4708;4709;4710;4711;4892;4893;4894;4895;4896;4897;6086;6087;6088;6089;6539;6540;6541;6542;6543;6544;6557;6558;6559;6606;6607;6608;6609;6610;6611;6612;6613;6614;6615;6616;6617;6826;6827;6828;6829;7399;7400;7978;7979;7980;7981;7982;7983;7984;7985;9178;9179;9180;9181;9390;9391;9392;9393…	2174;2175;2176;2177;2178;2179;2180;2181;2182;2183;2184;2185;2186;2187;2188;2189;2190;3778;3779;3780;4153;4154;4155;4156;4157;4158;4159;4160;4317;4318;4319;4320;5410;5411;5412;5413;5804;5805;5806;5807;5820;5821;5822;5823;5824;5825;5871;5872;5873;5874;5875;5876;5877;5878;5879;5880;5881;5882;6074;6075;6076;6077;6078;6079;6628;6629;7118;7119;7120;7121;7122;7123;7124;7125;7126;7127;7128;8158;8159;8160…
Q6ZWU9;Q9M2F1;O64650	Q6ZWU9	7;2;1	7;2;1	3;0;0	40S ribosomal protein S27	Rps27	sp|Q6ZWU9|RS27_MOUSE 40S ribosomal protein S27 OS=Mus musculus OX=10090 GN=Rps27 PE=1 SV=3	3	7	7	3	7	7	7	7	3	3	42.9	42.9	15.5	9.461	84	84;86;84	0	63.179	By MS/MS	By MS/MS	42.9	42.9	19582000000	10784000000	8798500000	4895600000	2696000000	2199600000	9514200000	5540200000	16	12	28				408	643;644;645;2769;2770;2840;3406	True;True;True;True;True;True;True	687;688;689;2946;2947;3022;3023;3654;3655	1685;1686;1687;1688;1689;1690;1691;1692;1693;1694;1695;1696;1697;1698;1699;7524;7525;7526;7527;7776;7777;7778;7779;9418;9419;9420;9421;9422;9423;9424;9425	1457;1458;1459;1460;1461;1462;1463;1464;1465;1466;1467;1468;1469;1470;1471;6730;6731;6732;6946;6947;6948;6949;6950;8349;8350;8351;8352;8353;8354;8355
Q6ZWV3;P86048	Q6ZWV3;P86048	21;17	21;17	21;17	60S ribosomal protein L10;60S ribosomal protein L10-like	Rpl10;Rpl10l	sp|Q6ZWV3|RL10_MOUSE 60S ribosomal protein L10 OS=Mus musculus OX=10090 GN=Rpl10 PE=1 SV=3;sp|P86048|RL10L_MOUSE 60S ribosomal protein L10-like OS=Mus musculus OX=10090 GN=Rpl10l PE=2 SV=1	2	21	21	21	21	17	21	17	21	17	65	65	65	24.604	214	214;214	0	323.31	By MS/MS	By MS/MS	65	63.1	79990000000	34914000000	45076000000	9998700000	4364300000	5634400000	32763000000	26452000000	42	44	86				409	232;873;874;1202;1203;1300;1528;1768;2000;2499;2524;2709;2710;3400;3474;3952;4175;4260;4459;4677;4678	True;True;True;True;True;True;True;True;True;True;True;True;True;True;True;True;True;True;True;True;True	253;254;936;937;1285;1286;1287;1288;1389;1627;1884;2128;2660;2686;2886;2887;3648;3728;4232;4466;4467;4554;4555;4764;4994;4995	639;640;641;642;643;644;645;646;647;648;2293;2294;2295;2296;2297;2298;2299;3120;3121;3122;3123;3124;3125;3126;3127;3128;3129;3130;3131;3132;3133;3134;3135;3136;3137;3138;3139;3140;3141;3142;3143;3144;3145;3146;3395;3396;3397;3398;3969;3970;4669;4670;5358;5359;6779;6780;6846;6847;6848;6849;7369;7370;7371;7372;7373;7374;7375;7376;7377;9404;9405;9625;9626;9627;9628;10918;10919;10920;11542;11543;1154…	565;566;567;568;569;570;571;572;573;1994;1995;1996;1997;1998;1999;2000;2736;2737;2738;2739;2740;2741;2742;2743;2744;2745;2746;2747;2748;2749;2750;2751;2752;2753;2754;2755;2756;2980;2981;2982;3476;4124;4754;6022;6023;6098;6099;6604;6605;6606;6607;6608;6609;6610;6611;8340;8539;8540;8541;8542;9668;9669;9670;10235;10236;10237;10238;10239;10240;10241;10242;10243;10427;10428;10429;10430;10431;10432;104…
Q6ZWV7	Q6ZWV7	7	7	7	60S ribosomal protein L35	Rpl35	sp|Q6ZWV7|RL35_MOUSE 60S ribosomal protein L35 OS=Mus musculus OX=10090 GN=Rpl35 PE=1 SV=1	1	7	7	7	7	7	7	7	7	7	36.6	36.6	36.6	14.552	123	123	0	161.41	By MS/MS	By MS/MS	36.6	36.6	53574000000	27588000000	25986000000	17858000000	9196100000	8661900000	26690000000	18114000000	16	11	27				410	1011;3264;4204;4386;4387;4388;4686	True;True;True;True;True;True;True	1080;3505;4497;4687;4688;4689;5004	2659;2660;8994;8995;8996;8997;8998;8999;11617;11618;12088;12089;12090;12091;12092;12093;12094;12095;12096;12097;12098;12099;12100;12101;12102;12103;12810;12811;12812;12813;12814;12815	2314;2315;8006;8007;8008;8009;8010;8011;10301;10302;10727;10728;10729;10730;10731;10732;10733;10734;10735;10736;10737;10738;10739;10740;11355;11356;11357;11358
Q6ZWX6	Q6ZWX6	2	2	2	Eukaryotic translation initiation factor 2 subunit 1	Eif2s1	sp|Q6ZWX6|IF2A_MOUSE Eukaryotic translation initiation factor 2 subunit 1 OS=Mus musculus OX=10090 GN=Eif2s1 PE=1 SV=3	1	2	2	2	1	2	1	2	1	2	6.3	6.3	6.3	36.108	315	315	0	12.756	By matching	By MS/MS	3.8	6.3	41470000	6630600	34840000	1885000	301390	1583600	0	23275000	0	2	2				411	1964;4541	True;True	2089;4852	5251;12470;12471	4654;11054
Q6ZWY3	Q6ZWY3	6	2	2	40S ribosomal protein S27-like	Rps27l	sp|Q6ZWY3|RS27L_MOUSE 40S ribosomal protein S27-like OS=Mus musculus OX=10090 GN=Rps27l PE=1 SV=3	1	6	2	2	6	6	2	2	2	2	41.7	14.3	14.3	9.4771	84	84	0	14.085	By MS/MS	By MS/MS	41.7	41.7	712510000	228680000	483840000	178130000	57169000	120960000	287810000	264090000	0	3	3				412	641;642;2769;2770;2840;3406	True;True;False;False;False;False	685;686;2946;2947;3022;3023;3654;3655	1679;1680;1681;1682;1683;1684;7524;7525;7526;7527;7776;7777;7778;7779;9418;9419;9420;9421;9422;9423;9424;9425	1453;1454;1455;1456;6730;6731;6732;6946;6947;6948;6949;6950;8349;8350;8351;8352;8353;8354;8355
Q76MZ3;Q7TNP2	Q76MZ3;Q7TNP2	2;1	2;1	2;1	Serine/threonine-protein phosphatase 2A 65 kDa regulatory subunit A alpha isoform;Serine/threonine-protein phosphatase 2A 65 kDa regulatory subunit A beta isoform	Ppp2r1a;Ppp2r1b	sp|Q76MZ3|2AAA_MOUSE Serine/threonine-protein phosphatase 2A 65 kDa regulatory subunit A alpha isoform OS=Mus musculus OX=10090 GN=Ppp2r1a PE=1 SV=3;sp|Q7TNP2|2AAB_MOUSE Serine/threonine-protein phosphatase 2A 65 kDa regulatory subunit A beta isoform OS=Mu	2	2	2	2	1	2	1	2	1	2	6.5	6.5	6.5	65.322	589	589;601	0	22.438	By MS/MS	By MS/MS	3.4	6.5	25978000	6319900	19659000	811830	197500	614330	0	13133000	1	2	3				413	1842;3287	True;True	1959;3528	4860;4861;9053	4290;4291;8056
Q78PY7	Q78PY7	4	4	4	Staphylococcal nuclease domain-containing protein 1	Snd1	sp|Q78PY7|SND1_MOUSE Staphylococcal nuclease domain-containing protein 1 OS=Mus musculus OX=10090 GN=Snd1 PE=1 SV=1	1	4	4	4	1	4	1	4	1	4	7.4	7.4	7.4	102.09	910	910	0	23.945	By MS/MS	By MS/MS	0.9	7.4	34899000	5300200	29599000	646290	98151	548130	0	19774000	1	4	5				414	3060;3233;3470;4373	True;True;True;True	3285;3474;3724;4673	8479;8924;8925;9619;12064	7562;7943;7944;8533;10706
Q791V5	Q791V5	2	2	2	Mitochondrial carrier homolog 2	Mtch2	sp|Q791V5|MTCH2_MOUSE Mitochondrial carrier homolog 2 OS=Mus musculus OX=10090 GN=Mtch2 PE=1 SV=1	1	2	2	2	0	2	0	2	0	2	12.2	12.2	12.2	33.499	303	303	0	14.315		By MS/MS	0	12.2	13852000	0	13852000	989400	0	989400	0	9253700	0	0	0				415	3325;4359	True;True	3568;4658	9153;12023	8140;10669
Q7TMF3	Q7TMF3	2	2	2	NADH dehydrogenase [ubiquinone] 1 alpha subcomplex subunit 12	Ndufa12	sp|Q7TMF3|NDUAC_MOUSE NADH dehydrogenase [ubiquinone] 1 alpha subcomplex subunit 12 OS=Mus musculus OX=10090 GN=Ndufa12 PE=1 SV=2	1	2	2	2	0	2	0	2	0	2	17.2	17.2	17.2	17.086	145	145	0	18.485		By MS/MS	0	17.2	27191000	0	27191000	3021200	0	3021200	0	18165000	0	2	2				416	1208;2891	True;True	1293;3079	3156;7928	2764;7079
Q7TPV4	Q7TPV4	58	58	58	Myb-binding protein 1A	Mybbp1a	sp|Q7TPV4|MBB1A_MOUSE Myb-binding protein 1A OS=Mus musculus OX=10090 GN=Mybbp1a PE=1 SV=2	1	58	58	58	56	51	56	51	56	51	44.4	44.4	44.4	152.04	1344	1344	0	323.31	By MS/MS	By MS/MS	42.9	41.6	24203000000	17468000000	6735500000	340890000	246020000	94866000	17145000000	4386100000	84	55	139				417	113;245;297;345;416;418;419;665;666;868;1097;1189;1368;1570;1643;1711;1883;1948;2090;2113;2137;2257;2283;2492;2533;2590;2687;2754;2763;2837;2843;2844;2866;2916;2955;3056;3057;3107;3154;3210;3242;3243;3308;3321;3349;3453;3679;3680;3681;3682;3687;3694;3776;4345;4560;4561;4624;4692	True;True;True;True;True;True;True;True;True;True;True;True;True;True;True;True;True;True;True;True;True;True;True;True;True;True;True;True;True;True;True;True;True;True;True;True;True;True;True;True;True;True;True;True;True;True;True;True;True;True;True;True;True;True;True;True;True;True	123;267;323;374;450;452;453;711;712;713;714;929;1166;1269;1460;1670;1745;1746;1823;2001;2070;2224;2249;2274;2403;2429;2653;2695;2754;2864;2931;2940;3018;3019;3026;3027;3049;3050;3115;3173;3174;3281;3282;3338;3339;3390;3449;3483;3484;3550;3551;3564;3594;3705;3950;3951;3952;3953;3958;3965;4048;4644;4872;4873;4939;5010	306;307;686;687;688;809;937;938;1096;1097;1099;1100;1101;1102;1103;1748;1749;1750;1751;1752;1753;1754;1755;2268;2269;2270;2271;2831;2832;2833;2834;3080;3081;3082;3083;3558;3559;4068;4069;4225;4226;4227;4228;4229;4230;4486;4487;4488;4975;4976;4977;4978;5172;5173;5174;5175;5604;5605;5668;5669;5670;5738;6149;6150;6221;6222;6762;6763;6764;6765;6864;6865;7062;7063;7064;7065;7330;7331;7482;7483;7507;75…	265;266;604;605;606;697;808;809;948;949;951;952;953;954;1514;1515;1516;1517;1518;1975;1976;1977;1978;2464;2465;2466;2467;2704;2705;2706;3111;3112;3558;3559;3689;3690;3691;3692;3950;3951;3952;4388;4389;4390;4391;4566;4567;4568;4979;5038;5039;5040;5102;5467;5468;5530;5531;6009;6010;6011;6113;6114;6337;6338;6339;6340;6572;6573;6698;6718;6719;6720;6938;6939;6940;6941;6942;6943;6956;6957;6958;6959;700…
Q7TQH0	Q7TQH0	2	2	2	Ataxin-2-like protein	Atxn2l	sp|Q7TQH0|ATX2L_MOUSE Ataxin-2-like protein OS=Mus musculus OX=10090 GN=Atxn2l PE=1 SV=1	1	2	2	2	2	2	2	2	2	2	2.9	2.9	2.9	110.65	1049	1049	0	13.196	By MS/MS	By MS/MS	2.9	2.9	57766000	25697000	32069000	1561200	694500	866740	25952000	21169000	2	2	4				418	846;2711	True;True	907;2888	2229;2230;7378;7379	1941;1942;6612;6613
Q7TSC1;P48634	Q7TSC1;P48634	4;2	4;2	4;2	Protein PRRC2A	Prrc2a;PRRC2A	sp|Q7TSC1|PRC2A_MOUSE Protein PRRC2A OS=Mus musculus OX=10090 GN=Prrc2a PE=1 SV=1;sp|P48634|PRC2A_HUMAN Protein PRRC2A OS=Homo sapiens OX=9606 GN=PRRC2A PE=1 SV=3	2	4	4	4	4	4	4	4	4	4	3.6	3.6	3.6	229.2	2158	2158;2157	0	26.445	By MS/MS	By MS/MS	3.6	3.6	80615000	38760000	41856000	767760	369140	398630	38334000	28387000	4	5	9				419	747;1539;2395;2621	True;True;True;True	801;1638;2549;2787	1983;1984;3995;3996;6529;6530;7138;7139;7140;7141	1719;1720;3498;3499;5796;5797;6407;6408;6409
Q80T69	Q80T69	3	3	3	Round spermatid basic protein 1	Rsbn1	sp|Q80T69|RSBN1_MOUSE Lysine-specific demethylase 9 OS=Mus musculus OX=10090 GN=Rsbn1 PE=1 SV=3	1	3	3	3	3	3	3	3	3	3	5.8	5.8	5.8	89.25	795	795	0	21.333	By MS/MS	By MS/MS	5.8	5.8	67396000	31487000	35909000	1925600	899630	1026000	32053000	23424000	2	1	3				420	457;1989;2704	True;True;True	494;2117;2881	1200;1201;5331;5332;7361;7362	1040;4732;6599
Q80UM7	Q80UM7	9	9	9	Mannosyl-oligosaccharide glucosidase	Mogs	sp|Q80UM7|MOGS_MOUSE Mannosyl-oligosaccharide glucosidase OS=Mus musculus OX=10090 GN=Mogs PE=1 SV=1	1	9	9	9	9	6	9	6	9	6	15.6	15.6	15.6	91.83	834	834	0	54.392	By MS/MS	By MS/MS	15.6	11.2	230510000	165620000	64896000	5762800	4140400	1622400	153740000	55233000	6	4	10				421	629;1369;1691;2481;2816;2885;3572;3689;3984	True;True;True;True;True;True;True;True;True	673;1461;1798;2641;2997;3071;3840;3960;4265	1653;1654;3560;4391;6736;6737;7712;7713;7914;7915;9885;10205;10206;10995;10996	1431;1432;3113;3858;5987;5988;6892;7069;8756;9037;9728
Q80VP2	Q80VP2	2	2	2	Spermatogenesis-associated protein 7 homolog	Spata7	sp|Q80VP2|SPAT7_MOUSE Spermatogenesis-associated protein 7 homolog OS=Mus musculus OX=10090 GN=Spata7 PE=1 SV=1	1	2	2	2	2	2	2	2	2	2	1.5	1.5	1.5	65.654	582	582	0	11.011	By MS/MS	By MS/MS	1.5	1.5	164630000	102890000	61738000	4988700	3117900	1870800	101740000	42395000	1	2	3				422	423;4455	True;True	457;4760	1110;1111;12270;12271	960;961;10889
Q80WJ7	Q80WJ7	3	3	3	Protein LYRIC	Mtdh	sp|Q80WJ7|LYRIC_MOUSE Protein LYRIC OS=Mus musculus OX=10090 GN=Mtdh PE=1 SV=1	1	3	3	3	1	3	1	3	1	3	8.6	8.6	8.6	63.845	579	579	0	18.917	By matching	By MS/MS	4.7	8.6	20900000	2143900	18756000	870850	89330	781520	0	12530000	0	2	2				423	951;3559;3872	True;True;True	1015;3825;4147	2498;9851;9852;10699	2173;8730;9461
Q80X50	Q80X50	3	3	3	Ubiquitin-associated protein 2-like	Ubap2l	sp|Q80X50|UBP2L_MOUSE Ubiquitin-associated protein 2-like OS=Mus musculus OX=10090 GN=Ubap2l PE=1 SV=1	1	3	3	3	3	3	3	3	3	3	3.3	3.3	3.3	116.8	1107	1107	0	27.376	By MS/MS	By MS/MS	3.3	3.3	95151000	30763000	64388000	3069400	992360	2077000	31466000	42312000	1	3	4				424	580;1781;2380	True;True;True	622;1897;2533	1516;1517;4697;4698;6497;6498	1317;1318;4147;5771
Q80X85	Q80X85	7	7	7	28S ribosomal protein S7, mitochondrial	Mrps7	sp|Q80X85|RT07_MOUSE 28S ribosomal protein S7, mitochondrial OS=Mus musculus OX=10090 GN=Mrps7 PE=1 SV=1	1	7	7	7	5	7	5	7	5	7	39.7	39.7	39.7	28.062	242	242	0	55.442	By matching	By MS/MS	28.5	39.7	312220000	98164000	214060000	24017000	7551100	16466000	108300000	132870000	0	8	8				425	0;37;1388;2742;2969;3636;4619	True;True;True;True;True;True;True	0;39;1480;2919;3188;3905;4934	0;1;80;81;3607;3608;7453;7454;7455;7456;8184;8185;10079;12668	0;68;3151;6674;6675;7293;8930;11230
Q80ZK0	Q80ZK0	3	3	3	28S ribosomal protein S10, mitochondrial	Mrps10	sp|Q80ZK0|RT10_MOUSE 28S ribosomal protein S10, mitochondrial OS=Mus musculus OX=10090 GN=Mrps10 PE=1 SV=1	1	3	3	3	2	3	2	3	2	3	31.2	31.2	31.2	18.698	160	160	0	44.541	By MS/MS	By MS/MS	21.2	31.2	138420000	20109000	118310000	17303000	2513700	14789000	0	79041000	0	4	4				426	448;745;1686	True;True;True	484;799;1793	1178;1179;1180;1980;1981;4382;4383	1020;1021;1022;1717;3850;3851
Q80ZS3	Q80ZS3	2	2	2	28S ribosomal protein S26, mitochondrial	Mrps26	sp|Q80ZS3|RT26_MOUSE 28S ribosomal protein S26, mitochondrial OS=Mus musculus OX=10090 GN=Mrps26 PE=1 SV=1	1	2	2	2	2	1	2	1	2	1	15	15	15	23.443	200	200	0	12.916	By MS/MS	By MS/MS	15	9	76371000	33464000	42907000	6942800	3042200	3900600	33464000	0	2	1	3				427	2705;4450	True;True	2882;4755	7363;12259;12260	6600;10879;10880
Q8BG05	Q8BG05	2	2	2	Heterogeneous nuclear ribonucleoprotein A3	Hnrnpa3	sp|Q8BG05|ROA3_MOUSE Heterogeneous nuclear ribonucleoprotein A3 OS=Mus musculus OX=10090 GN=Hnrnpa3 PE=1 SV=1	1	2	2	2	1	2	1	2	1	2	7.7	7.7	7.7	39.652	379	379	0	13.451	By matching	By MS/MS	3.4	7.7	48250000	5995400	42255000	2539500	315550	2223900	0	28229000	0	2	2				428	828;1824	True;True	888;1941	2196;2197;4819	1913;4260
Q8BGA5	Q8BGA5	2	2	2	KRR1 small subunit processome component homolog	Krr1	sp|Q8BGA5|KRR1_MOUSE KRR1 small subunit processome component homolog OS=Mus musculus OX=10090 GN=Krr1 PE=2 SV=1	1	2	2	2	0	2	0	2	0	2	6.8	6.8	6.8	43.537	380	380	0	10.961		By MS/MS	0	6.8	11719000	0	11719000	651060	0	651060	0	7829000	0	1	1				429	1473;1944	True;True	1567;2066	3831;5164	3360;4558
Q8BGH2	Q8BGH2	5	5	5	Sorting and assembly machinery component 50 homolog	Samm50	sp|Q8BGH2|SAM50_MOUSE Sorting and assembly machinery component 50 homolog OS=Mus musculus OX=10090 GN=Samm50 PE=1 SV=1	1	5	5	5	4	5	4	5	4	5	12.6	12.6	12.6	51.863	469	469	0	32	By MS/MS	By MS/MS	9.4	12.6	187570000	36195000	151370000	6252300	1206500	5045800	41335000	95987000	1	5	6				430	1038;1770;2686;3052;3945	True;True;True;True;True	1107;1886;2863;3277;4224	2709;2710;2711;4672;4673;7328;7329;8457;8458;10900	2355;2356;4126;6570;6571;7543;9653
Q8BH15	Q8BH15	2	2	2	CCR4-NOT transcription complex subunit 10	Cnot10	sp|Q8BH15|CNO10_MOUSE CCR4-NOT transcription complex subunit 10 OS=Mus musculus OX=10090 GN=Cnot10 PE=1 SV=1	1	2	2	2	1	2	1	2	1	2	3.4	3.4	3.4	81.817	744	744	0	14.097	By MS/MS	By MS/MS	1.6	3.4	32335000	2739800	29595000	873930	74050	799880	0	19771000	1	3	4				431	1442;1878	True;True	1536;1996	3741;3742;4960;4961	3265;3266;4376;4377
Q8BJZ4	Q8BJZ4	2	2	2	28S ribosomal protein S35, mitochondrial	Mrps35	sp|Q8BJZ4|RT35_MOUSE 28S ribosomal protein S35, mitochondrial OS=Mus musculus OX=10090 GN=Mrps35 PE=1 SV=2	1	2	2	2	1	2	1	2	1	2	8.8	8.8	8.8	35.975	320	320	0	13.485	By matching	By MS/MS	4.1	8.8	31622000	7432500	24190000	1664300	391190	1273100	0	16160000	0	2	2				432	1975;2547	True;True	2103;2710	5296;5297;6905	4705;6149
Q8BK35	Q8BK35	10	10	10		Gltscr2	sp|Q8BK35|NOP53_MOUSE Ribosome biogenesis protein NOP53 OS=Mus musculus OX=10090 GN=Nop53 PE=1 SV=1	1	10	10	10	10	6	10	6	10	6	29.1	29.1	29.1	55.792	484	484	0	80.159	By MS/MS	By MS/MS	29.1	20.7	401760000	276310000	125450000	20088000	13816000	6272600	251510000	108610000	9	4	13				433	175;2432;2433;2494;2627;2703;3263;3393;3698;4069	True;True;True;True;True;True;True;True;True;True	189;2588;2589;2655;2795;2880;3504;3641;3969;4354	464;6624;6625;6626;6768;6769;6770;6771;7158;7360;8992;8993;9378;9379;10231;10232;11238;11239	404;5888;5889;5890;6013;6014;6015;6426;6598;8005;8320;9058;9059;9956
Q8BK72	Q8BK72	9	9	9	28S ribosomal protein S27, mitochondrial	Mrps27	sp|Q8BK72|RT27_MOUSE 28S ribosomal protein S27, mitochondrial OS=Mus musculus OX=10090 GN=Mrps27 PE=1 SV=2	1	9	9	9	6	9	6	9	6	9	26.3	26.3	26.3	47.778	415	415	0	72.56	By MS/MS	By MS/MS	17.8	26.3	274280000	66935000	207340000	12467000	3042500	9424600	79774000	125680000	2	8	10				434	307;817;1057;1265;2206;2695;3136;3874;4209	True;True;True;True;True;True;True;True;True	333;875;1126;1354;2348;2872;3370;4149;4502	835;836;2164;2165;2742;2743;3312;5963;5964;7343;8669;8670;10702;11630;11631;11632;11633	720;1884;2382;2383;2909;5301;6583;7720;7721;9463;10310;10311
Q8BKS9	Q8BKS9	3	3	3	Pumilio domain-containing protein KIAA0020	Kiaa0020	sp|Q8BKS9|PUM3_MOUSE Pumilio homolog 3 OS=Mus musculus OX=10090 GN=Pum3 PE=1 SV=2	1	3	3	3	1	3	1	3	1	3	7.4	7.4	7.4	72.799	647	647	0	19.707	By MS/MS	By MS/MS	2.3	7.4	43007000	2923500	40083000	1303200	88590	1214600	0	26778000	1	3	4				435	682;1307;4225	True;True;True	735;1398;4519	1823;1824;3414;11681	1587;1588;2995;10356
Q8BL97	Q8BL97	4	4	3	Serine/arginine-rich splicing factor 7	Srsf7	sp|Q8BL97|SRSF7_MOUSE Serine/arginine-rich splicing factor 7 OS=Mus musculus OX=10090 GN=Srsf7 PE=1 SV=1	1	4	4	3	4	4	4	4	3	3	14.6	14.6	14.6	30.817	267	267	0	31.107	By MS/MS	By MS/MS	14.6	14.6	435850000	35488000	400370000	36321000	2957300	33364000	39165000	263790000	2	6	8				436	138;3103;3105;3717	True;True;True;True	149;3333;3335;3989	370;371;8587;8588;8589;8590;8592;8593;8594;10281;10282;10283	320;7653;7654;7655;7657;7658;9103;9104
Q8BMA6	Q8BMA6	8	8	8	Signal recognition particle subunit SRP68	Srp68	sp|Q8BMA6|SRP68_MOUSE Signal recognition particle subunit SRP68 OS=Mus musculus OX=10090 GN=Srp68 PE=1 SV=2	1	8	8	8	5	8	5	8	5	8	18.1	18.1	18.1	70.573	625	625	0	160.16	By MS/MS	By MS/MS	14.1	18.1	378660000	64436000	314230000	10819000	1841000	8977900	71408000	202410000	5	9	14				437	648;841;1822;2346;2429;3530;3531;4478	True;True;True;True;True;True;True;True	692;902;1939;2496;2585;3794;3795;4786	1702;1703;1704;1705;1706;2221;4815;4816;6387;6388;6389;6619;9790;9791;9792;12335;12336;12337;12338	1474;1475;1476;1934;4257;4258;5672;5673;5674;5884;8679;8680;8681;10942;10943
Q8BMC4	Q8BMC4	2	2	2	Nucleolar protein 9	Nop9	sp|Q8BMC4|NOP9_MOUSE Nucleolar protein 9 OS=Mus musculus OX=10090 GN=Nop9 PE=1 SV=1	1	2	2	2	2	1	2	1	2	1	4.2	4.2	4.2	70.046	636	636	0	12.748	By MS/MS	By matching	4.2	2.2	16633000	13082000	3551200	665340	523290	142050	13082000	0	1	0	1				438	1053;3124	True;True	1122;3358	2737;8648;8649	2378;7706
Q8BMF4	Q8BMF4	2	2	2	Dihydrolipoyllysine-residue acetyltransferase component of pyruvate dehydrogenase complex, mitochondrial	Dlat	sp|Q8BMF4|ODP2_MOUSE Dihydrolipoyllysine-residue acetyltransferase component of pyruvate dehydrogenase complex, mitochondrial OS=Mus musculus OX=10090 GN=Dlat PE=1 SV=2	1	2	2	2	1	2	1	2	1	2	5.1	5.1	5.1	67.941	642	642	0	13.708	By matching	By MS/MS	2.3	5.1	24444000	1906900	22537000	698400	54483	643920	0	15056000	0	2	2				439	1463;4147	True;True	1557;4438	3814;3815;11460	3349;10159
Q8BMS1	Q8BMS1	5	5	5	Trifunctional enzyme subunit alpha, mitochondrial;Long-chain enoyl-CoA hydratase;Long chain 3-hydroxyacyl-CoA dehydrogenase	Hadha	sp|Q8BMS1|ECHA_MOUSE Trifunctional enzyme subunit alpha, mitochondrial OS=Mus musculus OX=10090 GN=Hadha PE=1 SV=1	1	5	5	5	3	5	3	5	3	5	10.9	10.9	10.9	82.669	763	763	0	40.573	By matching	By MS/MS	7.1	10.9	68728000	7164000	61564000	1808600	188530	1620100	10021000	38271000	0	4	4				440	699;1054;1131;2933;4096	True;True;True;True;True	752;1123;1201;3142;4383	1853;1854;2738;2739;2918;8081;8082;11327	1613;2379;2562;7210;10040
Q8BP67	Q8BP67	11	11	11	60S ribosomal protein L24	Rpl24	sp|Q8BP67|RL24_MOUSE 60S ribosomal protein L24 OS=Mus musculus OX=10090 GN=Rpl24 PE=1 SV=2	1	11	11	11	11	11	11	11	11	11	36.3	36.3	36.3	17.779	157	157	0	135.09	By MS/MS	By MS/MS	36.3	36.3	55358000000	22218000000	33140000000	6919700000	2777300000	4142500000	22859000000	18743000000	28	35	63				441	211;212;481;482;2277;2912;3250;3251;3850;4203;4232	True;True;True;True;True;True;True;True;True;True;True	229;230;231;232;519;520;2423;3110;3111;3491;3492;4123;4496;4526	571;572;573;574;575;576;577;578;579;580;581;582;583;584;585;586;587;588;589;590;591;592;593;1253;1254;1255;1256;6209;6210;8000;8001;8002;8003;8004;8005;8006;8007;8959;8960;8961;8962;8963;10617;10618;10619;10620;10621;10622;10623;10624;11615;11616;11695;11696;11697;11698;11699;11700;11701;11702;11703;11704	504;505;506;507;508;509;510;511;512;513;514;515;516;517;518;519;520;521;522;523;524;525;526;1084;1085;1086;1087;5519;7141;7142;7143;7144;7145;7146;7147;7148;7973;7974;7975;7976;7977;7978;7979;9384;9385;9386;9387;9388;9389;10298;10299;10300;10366;10367;10368;10369;10370;10371;10372;10373;10374;10375;10376;10377;10378;10379;10380
Q8BP92	Q8BP92	2	2	2	Reticulocalbin-2	Rcn2	sp|Q8BP92|RCN2_MOUSE Reticulocalbin-2 OS=Mus musculus OX=10090 GN=Rcn2 PE=1 SV=1	1	2	2	2	0	2	0	2	0	2	11.9	11.9	11.9	37.27	320	320	0	11.54		By MS/MS	0	11.9	24369000	0	24369000	1740700	0	1740700	0	16280000	0	2	2				442	789;2736	True;True	845;2913	2084;7442	1806;6666
Q8BTI8	Q8BTI8	2	2	2	Serine/arginine repetitive matrix protein 2	Srrm2	sp|Q8BTI8|SRRM2_MOUSE Serine/arginine repetitive matrix protein 2 OS=Mus musculus OX=10090 GN=Srrm2 PE=1 SV=3	1	2	2	2	1	2	1	2	1	2	1.1	1.1	1.1	294.84	2703	2703	0	16.851	By matching	By MS/MS	0.5	1.1	42868000	5834100	37033000	363280	49442	313840	0	24740000	0	2	2				443	4018;4031	True;True	4299;4313	11103;11104;11131	9838;9860
Q8BU14	Q8BU14	2	2	2	Translocation protein SEC62	Sec62	sp|Q8BU14|SEC62_MOUSE Translocation protein SEC62 OS=Mus musculus OX=10090 GN=Sec62 PE=1 SV=1	1	2	2	2	0	2	0	2	0	2	5.3	5.3	5.3	45.58	398	398	0.0014085	10.521		By MS/MS	0	5.3	12344000	0	12344000	726110	0	726110	0	8246400	0	1	1				444	439;1988	True;True	475;2116	1156;5330	1001;4731
Q8BU30	Q8BU30	3	3	3	Isoleucine--tRNA ligase, cytoplasmic	Iars	sp|Q8BU30|SYIC_MOUSE Isoleucine--tRNA ligase, cytoplasmic OS=Mus musculus OX=10090 GN=Iars PE=1 SV=2	1	3	3	3	3	3	3	3	3	3	2	2	2	144.27	1262	1262	0	16.362	By MS/MS	By matching	2	2	43041000	29788000	13253000	705600	488330	217270	28464000	10178000	3	0	3				445	2437;2601;3795	True;True;True	2594;2765;4067	6632;6633;7087;7088;10495;10496	5895;6363;9281
Q8BU88	Q8BU88	6	6	6	39S ribosomal protein L22, mitochondrial	Mrpl22	sp|Q8BU88|RM22_MOUSE 39S ribosomal protein L22, mitochondrial OS=Mus musculus OX=10090 GN=Mrpl22 PE=1 SV=1	1	6	6	6	4	6	4	6	4	6	33.5	33.5	33.5	23.805	206	206	0	37.313	By MS/MS	By MS/MS	21.8	33.5	300070000	66413000	233660000	23082000	5108700	17974000	79553000	142960000	1	5	6				446	757;1058;1498;2813;3672;4551	True;True;True;True;True;True	811;1127;1594;2994;3942;4862	2001;2744;2745;3894;7706;7707;10166;10167;12496;12497	1733;2384;3415;6887;6888;9005;11080
Q8BVI4	Q8BVI4	2	2	2	Dihydropteridine reductase	Qdpr	sp|Q8BVI4|DHPR_MOUSE Dihydropteridine reductase OS=Mus musculus OX=10090 GN=Qdpr PE=1 SV=2	1	2	2	2	1	2	1	2	1	2	10	10	10	25.57	241	241	0	12.775	By matching	By MS/MS	4.6	10	51570000	5410700	46159000	3683500	386480	3297100	0	30837000	0	1	1				447	858;1318	True;True	919;1409	2251;2252;3453	1961;3025
Q8BVY0	Q8BVY0	22	22	22	Ribosomal L1 domain-containing protein 1	Rsl1d1	sp|Q8BVY0|RL1D1_MOUSE Ribosomal L1 domain-containing protein 1 OS=Mus musculus OX=10090 GN=Rsl1d1 PE=1 SV=1	1	22	22	22	16	22	16	22	16	22	58	58	58	50.421	452	452	0	257.14	By MS/MS	By MS/MS	35.8	58	2095300000	1029500000	1065900000	116410000	57192000	59215000	1114200000	627290000	17	19	36				448	268;269;489;546;742;1555;1657;1680;1837;2085;2091;2095;2150;2179;2222;2289;2599;2908;3262;3798;4432;4439	True;True;True;True;True;True;True;True;True;True;True;True;True;True;True;True;True;True;True;True;True;True	291;292;527;586;796;1655;1760;1787;1954;2218;2225;2229;2287;2319;2365;2435;2763;3103;3503;4070;4737;4744	737;738;739;740;741;742;1273;1274;1418;1965;1966;1967;4038;4270;4271;4363;4364;4846;4847;5586;5587;5606;5607;5608;5609;5616;5765;5766;5868;5869;6010;6011;6012;6238;6239;7083;7084;7977;8990;8991;10500;10501;10502;10503;12220;12235;12236	646;647;648;1105;1231;1705;1706;3531;3738;3834;3835;4278;4279;4963;4980;4981;4982;4983;4990;5129;5222;5341;5342;5343;5543;5544;6359;6360;7117;8003;8004;9284;9285;9286;10842;10858;10859
Q8BWW4	Q8BWW4	21	21	21	La-related protein 4	Larp4	sp|Q8BWW4|LARP4_MOUSE La-related protein 4 OS=Mus musculus OX=10090 GN=Larp4 PE=1 SV=2	1	21	21	21	19	18	19	18	19	18	42.3	42.3	42.3	79.763	719	719	0	323.31	By MS/MS	By MS/MS	34.8	38.7	4111100000	2791500000	1319600000	158120000	107370000	50754000	2730400000	932970000	26	20	46				449	207;259;429;537;664;712;792;1101;1697;1904;1978;2765;2802;2919;3268;3747;3749;3888;4005;4298;4425	True;True;True;True;True;True;True;True;True;True;True;True;True;True;True;True;True;True;True;True;True	225;282;463;577;710;766;848;1170;1807;2024;2106;2942;2982;3119;3509;4019;4021;4165;4166;4286;4594;4730	562;563;720;1120;1121;1398;1399;1747;1888;1889;1890;1891;2090;2091;2839;2840;2841;2842;4432;4433;4434;4435;5055;5304;5305;7515;7516;7638;7639;8021;8022;9010;9011;10379;10380;10383;10384;10385;10386;10752;10753;10754;10755;11058;11858;12208;12209	497;631;969;1215;1216;1513;1640;1641;1642;1643;1813;1814;2471;2472;2473;2474;2475;2476;2477;2478;3902;3903;3904;3905;4474;4711;6724;6725;6825;6826;7159;8022;8023;9186;9187;9190;9191;9192;9193;9502;9503;9504;9798;10511;10832;10833
Q8BWY3	Q8BWY3	2	2	2	Eukaryotic peptide chain release factor subunit 1	Etf1	sp|Q8BWY3|ERF1_MOUSE Eukaryotic peptide chain release factor subunit 1 OS=Mus musculus OX=10090 GN=Etf1 PE=1 SV=4	1	2	2	2	2	2	2	2	2	2	6.4	6.4	6.4	49.03	437	437	0	16.77	By MS/MS	By MS/MS	6.4	6.4	122450000	79299000	43148000	4897900	3172000	1725900	82463000	25661000	3	1	4				450	64;2764	True;True	66;2941	140;141;7511;7512;7513;7514	125;6721;6722;6723
Q8BX10	Q8BX10	2	2	2	Serine/threonine-protein phosphatase PGAM5, mitochondrial	Pgam5	sp|Q8BX10|PGAM5_MOUSE Serine/threonine-protein phosphatase PGAM5, mitochondrial OS=Mus musculus OX=10090 GN=Pgam5 PE=1 SV=1	1	2	2	2	2	2	2	2	2	2	6.2	6.2	6.2	31.994	288	288	0	10.821	By MS/MS	By MS/MS	6.2	6.2	67263000	32586000	34677000	3363100	1629300	1733800	32513000	23239000	2	1	3				451	991;998	True;True	1058;1066	2596;2597;2610;2611	2258;2259;2269
Q8C2Q3	Q8C2Q3	12	12	12	RNA-binding protein 14	Rbm14	sp|Q8C2Q3|RBM14_MOUSE RNA-binding protein 14 OS=Mus musculus OX=10090 GN=Rbm14 PE=1 SV=1	1	12	12	12	11	12	11	12	11	12	23.2	23.2	23.2	69.448	669	669	0	132.33	By MS/MS	By MS/MS	22	23.2	1247100000	503300000	743840000	54224000	21883000	32341000	496480000	503750000	9	12	21				452	195;301;357;358;401;1826;2144;2323;3401;4040;4043;4740	True;True;True;True;True;True;True;True;True;True;True;True	212;327;390;391;435;1943;2281;2470;3649;4322;4325;5064	527;528;819;969;970;971;972;1067;1068;4821;4822;4823;4824;5754;5755;6323;6324;6325;6326;9406;9407;9408;9409;11151;11152;11155;11156;11157;12945;12946	461;706;841;842;843;924;925;4262;4263;4264;5123;5625;5626;8341;8342;8343;8344;9876;9879;9880;9881;11474
Q8C3F2;Q9NX05	Q8C3F2;Q9NX05	2;2	2;2	2;2	Constitutive coactivator of PPAR-gamma-like protein 2	Fam120c;FAM120C	sp|Q8C3F2|F120C_MOUSE Constitutive coactivator of PPAR-gamma-like protein 2 OS=Mus musculus OX=10090 GN=Fam120c PE=1 SV=3;sp|Q9NX05|F120C_HUMAN Constitutive coactivator of PPAR-gamma-like protein 2 OS=Homo sapiens OX=9606 GN=FAM120C PE=1 SV=3	2	2	2	2	0	2	0	2	0	2	3	3	3	119.72	1091	1091;1096	0	11.485		By MS/MS	0	3	27070000	0	27070000	660240	0	660240	0	18084000	0	2	2				453	2758;3008	True;True	2935;3232	7490;8309	6704;7410
Q8C5L7	Q8C5L7	3	3	3	RNA-binding protein 34	Rbm34	sp|Q8C5L7|RBM34_MOUSE RNA-binding protein 34 OS=Mus musculus OX=10090 GN=Rbm34 PE=1 SV=1	1	3	3	3	0	3	0	3	0	3	16.3	16.3	16.3	41.325	375	375	0	25.042		By MS/MS	0	16.3	47843000	0	47843000	2278200	0	2278200	0	31962000	0	3	3				454	1013;2313;4128	True;True;True	1082;2460;4418	2662;6304;11407	2317;5609;10114
Q8CAQ8	Q8CAQ8	25	25	25	MICOS complex subunit Mic60	Immt	sp|Q8CAQ8|MIC60_MOUSE MICOS complex subunit Mic60 OS=Mus musculus OX=10090 GN=Immt PE=1 SV=1	1	25	25	25	16	24	16	24	16	24	47.3	47.3	47.3	83.899	757	757	0	323.31	By MS/MS	By MS/MS	26.3	47.3	1924000000	245090000	1678900000	41826000	5328000	36498000	306450000	1056400000	6	32	38				455	432;876;924;1419;1610;2082;2092;2435;2630;2738;2761;3244;3257;3610;3701;3768;3828;3949;4062;4151;4405;4446;4539;4635;4751	True;True;True;True;True;True;True;True;True;True;True;True;True;True;True;True;True;True;True;True;True;True;True;True;True	466;939;987;1513;1712;2215;2226;2591;2592;2798;2915;2938;3485;3498;3879;3972;4040;4101;4228;4344;4442;4709;4751;4850;4950;5075	1126;2302;2303;2428;2429;3689;3690;3691;4158;5580;5610;5611;6629;6630;7162;7163;7164;7445;7446;7499;7500;7501;7502;8947;8948;8980;10013;10014;10237;10427;10428;10569;10909;11200;11201;11469;12144;12145;12146;12250;12251;12252;12464;12465;12466;12467;12703;12704;12967;12968	973;2002;2003;2112;2113;3224;3225;3638;4955;4984;4985;5892;5893;6429;6430;6431;6668;6712;6713;6714;7963;7995;8869;9064;9227;9339;9661;9920;9921;10168;10774;10775;10872;10873;11050;11051;11052;11261;11262;11492
Q8CDN6	Q8CDN6	2	2	2	Thioredoxin-like protein 1	Txnl1	sp|Q8CDN6|TXNL1_MOUSE Thioredoxin-like protein 1 OS=Mus musculus OX=10090 GN=Txnl1 PE=1 SV=3	1	2	2	2	0	2	0	2	0	2	10.4	10.4	10.4	32.237	289	289	0	17.006		By MS/MS	0	10.4	17505000	0	17505000	1167000	0	1167000	0	11694000	0	2	2				456	1821;3504	True;True	1938;3764	4814;9714	4256;8613
Q8CFQ3	Q8CFQ3	2	2	2	Intron-binding protein aquarius	Aqr	sp|Q8CFQ3|AQR_MOUSE RNA helicase aquarius OS=Mus musculus OX=10090 GN=Aqr PE=1 SV=2	1	2	2	2	0	2	0	2	0	2	2.8	2.8	2.8	170.29	1481	1481	0	12.384		By MS/MS	0	2.8	9530800	0	9530800	144410	0	144410	0	6367100	0	2	2				457	13;3858	True;True	13;4133	24;10662	22;9424
Q8CGC4	Q8CGC4	2	2	2	Protein LSM14 homolog B	Lsm14b	sp|Q8CGC4|LS14B_MOUSE Protein LSM14 homolog B OS=Mus musculus OX=10090 GN=Lsm14b PE=1 SV=3	1	2	2	2	0	2	0	2	0	2	11.7	11.7	11.7	42.309	385	385	0	12.82		By MS/MS	0	11.7	41559000	0	41559000	2968500	0	2968500	0	27764000	0	2	2				458	351;3508	True;True	382;3768	952;9723	823;8620
Q8CGC6	Q8CGC6	8	8	8	RNA-binding protein 28	Rbm28	sp|Q8CGC6|RBM28_MOUSE RNA-binding protein 28 OS=Mus musculus OX=10090 GN=Rbm28 PE=1 SV=4	1	8	8	8	3	8	3	8	3	8	12.8	12.8	12.8	84.213	750	750	0	63.699	By MS/MS	By MS/MS	4.4	12.8	287490000	21156000	266340000	8455700	622230	7833400	29359000	169730000	2	10	12				459	168;495;1207;1320;3306;3422;3487;4528	True;True;True;True;True;True;True;True	181;533;1292;1411;3548;3673;3745;4838	444;445;1288;3154;3155;3456;9104;9470;9471;9665;9666;9667;12443;12444	386;387;1117;2763;3028;8100;8393;8394;8575;8576;11027;11028
Q8CGC7;Q9M1R2	Q8CGC7	6;1	6;1	6;1	Bifunctional glutamate/proline--tRNA ligase;Glutamate--tRNA ligase;Proline--tRNA ligase	Eprs	sp|Q8CGC7|SYEP_MOUSE Bifunctional glutamate/proline--tRNA ligase OS=Mus musculus OX=10090 GN=Eprs PE=1 SV=4	2	6	6	6	5	3	5	3	5	3	6	6	6	170.08	1512	1512;530	0	41.359	By MS/MS	By MS/MS	5.1	2.7	93974000	81257000	12716000	1118700	967350	151380	70019000	19733000	5	3	8				460	689;1012;2661;4152;4468;4552	True;True;True;True;True;True	742;1081;2830;4443;4776;4863	1838;2661;7232;11470;12313;12314;12498;12499	1601;2316;6488;10169;10923;10924;11081;11082
Q8CI11	Q8CI11	24	24	24	Guanine nucleotide-binding protein-like 3	Gnl3	sp|Q8CI11|GNL3_MOUSE Guanine nucleotide-binding protein-like 3 OS=Mus musculus OX=10090 GN=Gnl3 PE=1 SV=2	1	24	24	24	22	22	22	22	22	22	49.8	49.8	49.8	60.786	538	538	0	239.85	By MS/MS	By MS/MS	44.4	48	1532000000	1008700000	523230000	47874000	31523000	16351000	1027500000	330830000	23	14	37				461	388;506;611;702;964;984;1370;1371;2103;2194;2299;2523;2591;2592;2956;3307;3666;3684;3739;4278;4279;4535;4760;4761	True;True;True;True;True;True;True;True;True;True;True;True;True;True;True;True;True;True;True;True;True;True;True;True	422;546;655;755;1028;1049;1462;1463;2237;2334;2445;2685;2755;2756;3175;3549;3936;3955;4011;4573;4574;4846;5085;5086	1044;1045;1322;1323;1595;1596;1597;1862;2537;2538;2579;2580;3561;3562;3563;5635;5636;5637;5638;5909;5910;6259;6260;6844;6845;7066;7067;7068;8156;8157;9105;9106;9107;10152;10153;10194;10352;10353;11820;11821;11822;11823;11824;12457;12458;12987;12988;12989;12990	906;1147;1148;1384;1385;1386;1620;2210;2242;2243;3114;3115;5008;5009;5010;5259;5260;5563;6096;6097;6341;6342;6343;7270;7271;8101;8102;8995;8996;9028;9159;10482;10483;10484;10485;11045;11511;11512
Q8CIE6	Q8CIE6	4	4	4	Coatomer subunit alpha;Xenin;Proxenin	Copa	sp|Q8CIE6|COPA_MOUSE Coatomer subunit alpha OS=Mus musculus OX=10090 GN=Copa PE=1 SV=2	1	4	4	4	4	4	4	4	4	4	4.7	4.7	4.7	138.43	1224	1224	0	39.136	By MS/MS	By MS/MS	4.7	4.7	103500000	26393000	77103000	1478500	377040	1101500	27105000	50797000	1	2	3				462	386;1436;3961;4503	True;True;True;True	420;1530;4241;4813	1040;1041;3724;3725;10938;10939;12390;12391	904;3249;3250;9685;10987
Q8CJ67	Q8CJ67	3	3	3	Double-stranded RNA-binding protein Staufen homolog 2	Stau2	sp|Q8CJ67|STAU2_MOUSE Double-stranded RNA-binding protein Staufen homolog 2 OS=Mus musculus OX=10090 GN=Stau2 PE=1 SV=1	1	3	3	3	3	2	3	2	3	2	6.3	6.3	6.3	62.535	570	570	0	25.119	By MS/MS	By MS/MS	6.3	4	130120000	84148000	45971000	3614400	2337400	1277000	77185000	37674000	3	2	5				463	39;280;4501	True;True;True	41;303;4811	83;84;762;12386;12387	70;71;661;10984;10985
Q8CJG0;Q8CJG1;Q8CJF9;Q8CJF8	Q8CJG0	12;3;2;2	12;3;2;2	12;3;2;2	Protein argonaute-2	Ago2	sp|Q8CJG0|AGO2_MOUSE Protein argonaute-2 OS=Mus musculus OX=10090 GN=Ago2 PE=1 SV=3	4	12	12	12	5	12	5	12	5	12	18.8	18.8	18.8	97.303	860	860;857;860;861	0	90.904	By MS/MS	By MS/MS	8	18.8	164180000	18543000	145640000	3219200	363590	2855600	31034000	84802000	2	11	13				464	193;459;587;947;1733;2691;3072;3224;3464;3510;3557;4381	True;True;True;True;True;True;True;True;True;True;True;True	210;496;630;1011;1846;2868;3297;3463;3718;3770;3823;4681	525;1204;1205;1535;1536;2490;4556;4557;7338;8500;8501;8889;9605;9606;9726;9849;12080	459;1043;1333;2165;4013;6578;7580;7581;7911;8522;8523;8622;8728;10719
Q8JZQ9	Q8JZQ9	5	5	5	Eukaryotic translation initiation factor 3 subunit B	Eif3b	sp|Q8JZQ9|EIF3B_MOUSE Eukaryotic translation initiation factor 3 subunit B OS=Mus musculus OX=10090 GN=Eif3b PE=1 SV=1	1	5	5	5	3	4	3	4	3	4	12.1	12.1	12.1	91.369	803	803	0	30.911	By MS/MS	By MS/MS	6	10	85050000	46012000	39038000	2298700	1243600	1055100	45993000	26098000	1	4	5				465	571;691;1620;3186;4057	True;True;True;True;True	612;744;1722;3422;4339	1492;1840;4183;4184;8796;8797;11188	1298;1603;3656;3657;7830;9908
Q8K019	Q8K019	3	3	3	Bcl-2-associated transcription factor 1	Bclaf1	sp|Q8K019|BCLF1_MOUSE Bcl-2-associated transcription factor 1 OS=Mus musculus OX=10090 GN=Bclaf1 PE=1 SV=2	1	3	3	3	0	3	0	3	0	3	5.4	5.4	5.4	106	919	919	0	16.216		By MS/MS	0	5.4	25510000	0	25510000	728850	0	728850	0	17042000	0	2	2				466	2544;2878;3767	True;True;True	2707;3062;4039	6896;7878;10426	6142;7036;9226
Q8K224	Q8K224	3	3	3	N-acetyltransferase 10	Nat10	sp|Q8K224|NAT10_MOUSE RNA cytidine acetyltransferase OS=Mus musculus OX=10090 GN=Nat10 PE=1 SV=1	1	3	3	3	3	2	3	2	3	2	3.8	3.8	3.8	115.42	1024	1024	0	17.23	By MS/MS	By MS/MS	3.8	2.9	30395000	22300000	8095500	562880	412960	149920	22300000	0	1	1	2				467	156;2405;4104	True;True;True	167;2560;4392	410;6560;6561;11345;11346	356;5826;5827;10057
Q8K2M0	Q8K2M0	5	5	5	39S ribosomal protein L38, mitochondrial	Mrpl38	sp|Q8K2M0|RM38_MOUSE 39S ribosomal protein L38, mitochondrial OS=Mus musculus OX=10090 GN=Mrpl38 PE=1 SV=2	1	5	5	5	5	5	5	5	5	5	13.7	13.7	13.7	45.029	380	380	0	36.143	By MS/MS	By MS/MS	13.7	13.7	218730000	99459000	119270000	10936000	4973000	5963500	94103000	85035000	2	4	6				468	1080;2324;3367;3832;4131	True;True;True;True;True	1149;2471;3614;4105;4421	2800;2801;6327;6328;9298;9299;10574;10575;11413;11414	2432;5627;5628;8256;9344;9345;10118;10119
Q8K2Y7	Q8K2Y7	6	6	6	39S ribosomal protein L47, mitochondrial	Mrpl47	sp|Q8K2Y7|RM47_MOUSE 39S ribosomal protein L47, mitochondrial OS=Mus musculus OX=10090 GN=Mrpl47 PE=1 SV=2	1	6	6	6	5	6	5	6	5	6	21	21	21	29.725	252	252	0	36.556	By MS/MS	By MS/MS	17.1	21	192720000	45699000	147020000	11336000	2688200	8648000	57162000	86753000	1	6	7				469	1214;1460;1461;2624;2861;3076	True;True;True;True;True;True	1299;1554;1555;2790;3044;3301	3173;3174;3808;3809;3810;3811;7146;7831;7832;8506;8507	2778;3346;3347;6414;6998;6999;7585
Q8K310	Q8K310	5	5	5	Matrin-3	Matr3	sp|Q8K310|MATR3_MOUSE Matrin-3 OS=Mus musculus OX=10090 GN=Matr3 PE=1 SV=1	1	5	5	5	5	4	5	4	5	4	10.5	10.5	10.5	94.629	846	846	0	45.52	By MS/MS	By MS/MS	10.5	8.9	150830000	79996000	70838000	4076600	2162100	1914600	63046000	64274000	5	2	7				470	695;1310;1336;2030;4284	True;True;True;True;True	748;1401;1427;2161;4580	1846;1847;3421;3422;3487;3488;3489;3490;5434;11835;11836	1609;2999;3052;3053;3054;3055;4815;10493
Q8K363	Q8K363	2	2	2	ATP-dependent RNA helicase DDX18	Ddx18	sp|Q8K363|DDX18_MOUSE ATP-dependent RNA helicase DDX18 OS=Mus musculus OX=10090 GN=Ddx18 PE=1 SV=1	1	2	2	2	2	1	2	1	2	1	3.3	3.3	3.3	74.18	660	660	0	13.456	By MS/MS	By MS/MS	3.3	1.8	29199000	14312000	14887000	858790	420940	437850	0	9945400	1	1	2				471	4431;4467	True;True	4736;4775	12218;12219;12312	10841;10922
Q8K370	Q8K370	5	5	5	Acyl-CoA dehydrogenase family member 10	Acad10	sp|Q8K370|ACD10_MOUSE Acyl-CoA dehydrogenase family member 10 OS=Mus musculus OX=10090 GN=Acad10 PE=1 SV=1	1	5	5	5	4	5	4	5	4	5	6.5	6.5	6.5	118.98	1069	1069	0	37.534	By MS/MS	By MS/MS	5.6	6.5	126730000	29197000	97529000	2147900	494860	1653000	28307000	66045000	2	5	7				472	107;980;1391;3823;4590	True;True;True;True;True	115;1045;1484;4096;4902	282;283;2574;3615;3616;10552;10553;12589;12590	241;2238;3157;3158;9326;11164;11165
Q8K3J1	Q8K3J1	2	2	2	NADH dehydrogenase [ubiquinone] iron-sulfur protein 8, mitochondrial	Ndufs8	sp|Q8K3J1|NDUS8_MOUSE NADH dehydrogenase [ubiquinone] iron-sulfur protein 8, mitochondrial OS=Mus musculus OX=10090 GN=Ndufs8 PE=1 SV=1	1	2	2	2	1	2	1	2	1	2	12.7	12.7	12.7	24.038	212	212	0	16.997	By matching	By MS/MS	4.2	12.7	26325000	576450	25749000	2025000	44342	1980700	0	17202000	0	3	3				473	1940;2367	True;True	2062;2519	5156;5157;6465;6466	4552;5743;5744
Q8K3W3	Q8K3W3	4	4	4	Protein CASC3	Casc3	sp|Q8K3W3|CASC3_MOUSE Protein CASC3 OS=Mus musculus OX=10090 GN=Casc3 PE=1 SV=3	1	4	4	4	3	4	3	4	3	4	8.3	8.3	8.3	75.769	698	698	0	31.042	By MS/MS	By MS/MS	6.3	8.3	228510000	40548000	187960000	8463300	1501800	6961500	56933000	109180000	1	6	7				474	10;3441;3724;4032	True;True;True;True	10;3693;3996;4314	16;17;9533;9534;9535;10305;10306;11132;11133	14;15;8448;8449;9121;9122;9861
Q8K4L0	Q8K4L0	2	2	2	ATP-dependent RNA helicase DDX54	Ddx54	sp|Q8K4L0|DDX54_MOUSE ATP-dependent RNA helicase DDX54 OS=Mus musculus OX=10090 GN=Ddx54 PE=1 SV=1	1	2	2	2	2	1	2	1	2	1	1.9	1.9	1.9	97.747	874	874	0	11.232	By MS/MS	By MS/MS	1.9	0.8	23775000	18716000	5058900	528330	415910	112420	18716000	0	1	0	1				475	167;2636	True;True	180;2804	443;7177;7178	385;6441;6442
Q8K4Z3	Q8K4Z3	2	2	2	NAD(P)H-hydrate epimerase	Apoa1bp	sp|Q8K4Z3|NNRE_MOUSE NAD(P)H-hydrate epimerase OS=Mus musculus OX=10090 GN=Naxe PE=1 SV=1	1	2	2	2	0	2	0	2	0	2	10.6	10.6	10.6	30.972	282	282	0	13.786		By MS/MS	0	10.6	56630000	0	56630000	4045000	0	4045000	0	37832000	0	2	2				476	1508;2436	True;True	1606;2593	3923;6631	3437;5894
Q8K4Z5	Q8K4Z5	2	2	2	Splicing factor 3A subunit 1	Sf3a1	sp|Q8K4Z5|SF3A1_MOUSE Splicing factor 3A subunit 1 OS=Mus musculus OX=10090 GN=Sf3a1 PE=1 SV=1	1	2	2	2	0	2	0	2	0	2	5.4	5.4	5.4	88.544	791	791	0	13.021		By MS/MS	0	5.4	35207000	0	35207000	858710	0	858710	0	23520000	0	2	2				477	377;4041	True;True	411;4323	1025;11153	891;9877
Q8QZY1	Q8QZY1	5	5	5	Eukaryotic translation initiation factor 3 subunit L	Eif3l	sp|Q8QZY1|EIF3L_MOUSE Eukaryotic translation initiation factor 3 subunit L OS=Mus musculus OX=10090 GN=Eif3l PE=1 SV=1	1	5	5	5	4	4	4	4	4	4	10.3	10.3	10.3	66.612	564	564	0	34.59	By MS/MS	By MS/MS	8.9	7.4	74800000	40427000	34373000	2579300	1394000	1185300	34677000	28713000	2	3	5				478	1990;2325;2998;4233;4553	True;True;True;True;True	2118;2472;3220;4527;4864	5333;5334;6329;6330;8281;11705;12500;12501	4733;4734;5629;7387;10381;11083
Q8QZY9	Q8QZY9	2	2	2	Splicing factor 3B subunit 4	Sf3b4	sp|Q8QZY9|SF3B4_MOUSE Splicing factor 3B subunit 4 OS=Mus musculus OX=10090 GN=Sf3b4 PE=1 SV=1	1	2	2	2	0	2	0	2	0	2	9.7	9.7	9.7	44.355	424	424	0	13.705		By MS/MS	0	9.7	18405000	0	18405000	1150300	0	1150300	0	12296000	0	3	3				479	2639;4492	True;True	2807;4800	7183;7184;12360	6447;6448;10960
Q8R035	Q8R035	2	2	2	Peptidyl-tRNA hydrolase ICT1, mitochondrial	Ict1	sp|Q8R035|ICT1_MOUSE Peptidyl-tRNA hydrolase ICT1, mitochondrial OS=Mus musculus OX=10090 GN=Mrpl58 PE=1 SV=1	1	2	2	2	0	2	0	2	0	2	14.1	14.1	14.1	23.477	206	206	0	17.626		By MS/MS	0	14.1	84749000	0	84749000	7704500	0	7704500	0	56617000	0	3	3				480	1147;3326	True;True	1220;3569	2959;2960;9154	2596;2597;8141
Q8R1B4	Q8R1B4	4	4	4	Eukaryotic translation initiation factor 3 subunit C	Eif3c	sp|Q8R1B4|EIF3C_MOUSE Eukaryotic translation initiation factor 3 subunit C OS=Mus musculus OX=10090 GN=Eif3c PE=1 SV=1	1	4	4	4	4	4	4	4	4	4	5	5	5	105.53	911	911	0	25.784	By MS/MS	By MS/MS	5	5	88721000	45935000	42785000	2112400	1093700	1018700	48474000	26045000	3	1	4				481	945;2651;3877;4546	True;True;True;True	1009;2820;4152;4857	2486;2487;7213;7214;10706;10707;12481;12482	2163;6474;9466;9467;11060
Q8R2Y8	Q8R2Y8	2	2	2	Peptidyl-tRNA hydrolase 2, mitochondrial	Ptrh2	sp|Q8R2Y8|PTH2_MOUSE Peptidyl-tRNA hydrolase 2, mitochondrial OS=Mus musculus OX=10090 GN=Ptrh2 PE=1 SV=1	1	2	2	2	1	2	1	2	1	2	19.9	19.9	19.9	19.526	181	181	0	13.943	By matching	By MS/MS	8.3	19.9	13433000	3882600	9550500	1492600	431400	1061200	0	6380300	0	2	2				482	324;4095	True;True	353;4382	883;884;11326	758;10039
Q8VDD5;P35579	Q8VDD5;P35579	15;14	10;9	9;8	Myosin-9	Myh9;MYH9	sp|Q8VDD5|MYH9_MOUSE Myosin-9 OS=Mus musculus OX=10090 GN=Myh9 PE=1 SV=4;sp|P35579|MYH9_HUMAN Myosin-9 OS=Homo sapiens OX=9606 GN=MYH9 PE=1 SV=4	2	15	10	9	8	15	5	10	4	9	11	7.9	7.1	226.37	1960	1960;1960	0	70.913	By MS/MS	By MS/MS	5.8	11	177140000	21817000	155320000	1703300	209780	1493500	32039000	93542000	1	8	9				483	66;176;1760;2120;2191;2239;2392;2712;2997;3267;3280;3855;4038;4301;4473	False;False;True;False;True;True;False;True;True;True;True;True;False;True;True	68;190;1876;2256;2331;2382;2546;2889;3219;3508;3521;4130;4320;4597;4781	143;144;465;4656;4657;5686;5687;5905;6066;6524;6525;7380;7381;8279;8280;9009;9040;9041;10658;11148;11866;12325;12326;12327;12328	127;405;4115;5054;5255;5392;5792;6614;7386;8021;8047;8048;9421;9874;10518;10933;10934;10935
Q8VDJ3	Q8VDJ3	6	6	6	Vigilin	Hdlbp	sp|Q8VDJ3|VIGLN_MOUSE Vigilin OS=Mus musculus OX=10090 GN=Hdlbp PE=1 SV=1	1	6	6	6	5	5	5	5	5	5	6.5	6.5	6.5	141.74	1268	1268	0	42.771	By MS/MS	By MS/MS	5.7	6.1	120300000	45435000	74869000	1822800	688410	1134400	44658000	50794000	3	4	7				484	395;1510;1875;1876;3753;3869	True;True;True;True;True;True	429;1608;1993;1994;4025;4144	1056;1057;1058;1059;3926;4955;4956;4957;10392;10393;10686;10687	915;916;917;3439;4372;4373;9198;9444
Q8VDM6	Q8VDM6	4	4	4	Heterogeneous nuclear ribonucleoprotein U-like protein 1	Hnrnpul1	sp|Q8VDM6|HNRL1_MOUSE Heterogeneous nuclear ribonucleoprotein U-like protein 1 OS=Mus musculus OX=10090 GN=Hnrnpul1 PE=1 SV=1	1	4	4	4	0	4	0	4	0	4	5	5	5	96.001	859	859	0	26.312		By MS/MS	0	5	55475000	0	55475000	1631600	0	1631600	0	37060000	0	3	3				485	217;1960;2526;4572	True;True;True;True	237;2085;2688;4884	607;5240;6854;12553	540;4642;6103;11133
Q8VDN2;Q6PIC6;Q6PIE5	Q8VDN2	5;1;1	5;1;1	5;1;1	Sodium/potassium-transporting ATPase subunit alpha-1	Atp1a1	sp|Q8VDN2|AT1A1_MOUSE Sodium/potassium-transporting ATPase subunit alpha-1 OS=Mus musculus OX=10090 GN=Atp1a1 PE=1 SV=1	3	5	5	5	5	5	5	5	5	5	6.5	6.5	6.5	112.98	1023	1023;1013;1020	0	44.525	By MS/MS	By MS/MS	6.5	6.5	156640000	50676000	105960000	3405200	1101700	2303600	51665000	69801000	1	4	5				486	443;1594;2042;2654;3685	True;True;True;True;True	479;1695;2173;2823;3956	1165;1166;4129;4130;5465;5466;7218;7219;10195;10196	1009;3610;3611;4847;6477;9029
Q8VDW0;Q9Z1N5;Q9LFN6;Q56XG6	Q8VDW0;Q9Z1N5;Q9LFN6;Q56XG6	2;2;1;1	2;2;1;1	2;2;1;1	ATP-dependent RNA helicase DDX39A;Spliceosome RNA helicase Ddx39b;DEAD-box ATP-dependent RNA helicase 56;DEAD-box ATP-dependent RNA helicase 15	Ddx39a;Ddx39b;RH56;RH15	sp|Q8VDW0|DX39A_MOUSE ATP-dependent RNA helicase DDX39A OS=Mus musculus OX=10090 GN=Ddx39a PE=1 SV=1;sp|Q9Z1N5|DX39B_MOUSE Spliceosome RNA helicase Ddx39b OS=Mus musculus OX=10090 GN=Ddx39b PE=1 SV=1;sp|Q9LFN6|RH56_ARATH DEAD-box ATP-dependent RNA helicase	4	2	2	2	1	2	1	2	1	2	4.7	4.7	4.7	49.067	427	427;428;427;427	0	13.556	By matching	By MS/MS	2.3	4.7	33565000	5687200	27878000	1766600	299330	1467300	0	18624000	0	2	2				487	565;1953	True;True	606;2075	1473;5220;5221	1279;4623
Q8VE22	Q8VE22	6	6	6	28S ribosomal protein S23, mitochondrial	Mrps23	sp|Q8VE22|RT23_MOUSE 28S ribosomal protein S23, mitochondrial OS=Mus musculus OX=10090 GN=Mrps23 PE=1 SV=1	1	6	6	6	4	6	4	6	4	6	42.9	42.9	42.9	20.348	177	177	0	77.582	By MS/MS	By MS/MS	31.1	42.9	450200000	98889000	351310000	45020000	9888900	35131000	111580000	222010000	4	6	10				488	78;121;221;267;2694;4757	True;True;True;True;True;True	81;131;241;290;2871;5081	189;190;329;330;613;735;736;7342;12982;12983	164;165;287;288;545;644;645;6582;11506;11507
Q8VEK3	Q8VEK3	3	3	3	Heterogeneous nuclear ribonucleoprotein U	Hnrnpu	sp|Q8VEK3|HNRPU_MOUSE Heterogeneous nuclear ribonucleoprotein U OS=Mus musculus OX=10090 GN=Hnrnpu PE=1 SV=1	1	3	3	3	2	3	2	3	2	3	5.9	5.9	5.9	87.917	800	800	0	20.037	By MS/MS	By MS/MS	5	5.9	102420000	46436000	55981000	2926200	1326800	1599400	50191000	33644000	1	2	3				489	908;2665;3740	True;True;True	971;2838;4012	2385;2386;7260;10354;10355	2074;2075;6512;9160
Q8VEM8	Q8VEM8	6	6	6	Phosphate carrier protein, mitochondrial	Slc25a3	sp|Q8VEM8|MPCP_MOUSE Phosphate carrier protein, mitochondrial OS=Mus musculus OX=10090 GN=Slc25a3 PE=1 SV=1	1	6	6	6	4	6	4	6	4	6	22.7	22.7	22.7	39.632	357	357	0	71.196	By MS/MS	By MS/MS	10.6	22.7	399580000	132530000	267060000	21031000	6975000	14056000	127740000	183200000	3	6	9				490	306;1135;1569;1588;1994;4774	True;True;True;True;True;True	332;1205;1669;1689;2122;5099	834;2931;2932;4066;4067;4119;4120;5342;5343;13026	719;2573;3556;3557;3602;3603;4741;4742;11552
Q8VH51	Q8VH51	4	4	4	RNA-binding protein 39	Rbm39	sp|Q8VH51|RBM39_MOUSE RNA-binding protein 39 OS=Mus musculus OX=10090 GN=Rbm39 PE=1 SV=2	1	4	4	4	3	4	3	4	3	4	10.8	10.8	10.8	59.406	530	530	0	35.271	By MS/MS	By MS/MS	7.9	10.8	138380000	50871000	87509000	5765800	2119600	3646200	51791000	57540000	1	5	6				491	62;3847;3899;4356	True;True;True;True	64;4120;4177;4655	138;10611;10612;10775;10776;12016;12017;12018;12019	123;9380;9381;9518;10665;10666
Q8VHK9;Q9H2U1	Q8VHK9;Q9H2U1	2;2	2;2	2;2	ATP-dependent RNA helicase DHX36	Dhx36;DHX36	sp|Q8VHK9|DHX36_MOUSE ATP-dependent RNA helicase DHX36 OS=Mus musculus OX=10090 GN=Dhx36 PE=1 SV=2;sp|Q9H2U1|DHX36_HUMAN ATP-dependent RNA helicase DHX36 OS=Homo sapiens OX=9606 GN=DHX36 PE=1 SV=2	2	2	2	2	2	2	2	2	2	2	2.4	2.4	2.4	113.88	1001	1001;1008	0	13.226	By MS/MS	By MS/MS	2.4	2.4	31418000	13906000	17512000	668470	295870	372600	14013000	10657000	1	2	3				492	380;2468	True;True	414;2626	1030;1031;1032;6710;6711	896;897;5968
Q8VIJ6	Q8VIJ6	5	5	5	Splicing factor, proline- and glutamine-rich	Sfpq	sp|Q8VIJ6|SFPQ_MOUSE Splicing factor, proline- and glutamine-rich OS=Mus musculus OX=10090 GN=Sfpq PE=1 SV=1	1	5	5	5	2	5	2	5	2	5	9.9	9.9	9.9	75.441	699	699	0	29.72	By MS/MS	By MS/MS	3.4	9.9	74717000	17459000	57257000	2490600	581980	1908600	0	38251000	1	4	5				493	314;1144;2451;3194;4650	True;True;True;True;True	342;1217;2609;3431;4967	857;858;2955;6666;6667;8814;12736	739;2593;5928;5929;7847;11289
Q91VC3;Q94A52	Q91VC3	15;2	15;2	10;0	Eukaryotic initiation factor 4A-III;Eukaryotic initiation factor 4A-III, N-terminally processed	Eif4a3	sp|Q91VC3|IF4A3_MOUSE Eukaryotic initiation factor 4A-III OS=Mus musculus OX=10090 GN=Eif4a3 PE=1 SV=3	2	15	15	10	13	15	13	15	8	10	40.1	40.1	31.6	46.839	411	411;408	0	150.14	By MS/MS	By MS/MS	29	40.1	1791100000	516830000	1274200000	77873000	22471000	55402000	576820000	777400000	9	18	27				494	550;920;1200;1367;1444;1459;1472;2187;2276;2403;3230;3351;3392;4360;4700	True;True;True;True;True;True;True;True;True;True;True;True;True;True;True	590;983;1283;1459;1538;1553;1566;2327;2422;2558;3469;3597;3640;4659;5021;5022	1431;1432;2420;2421;3116;3117;3554;3555;3556;3557;3744;3745;3746;3747;3806;3807;3830;5889;5890;5891;5892;6207;6208;6555;6556;8901;8902;9225;9226;9376;9377;12024;12025;12853;12854;12855	1244;2106;2107;2734;3107;3108;3109;3110;3268;3269;3270;3344;3345;3359;5241;5242;5243;5517;5518;5818;5819;7923;8197;8198;8319;10670;11398;11399
Q91VD9	Q91VD9	8	8	8	NADH-ubiquinone oxidoreductase 75 kDa subunit, mitochondrial	Ndufs1	sp|Q91VD9|NDUS1_MOUSE NADH-ubiquinone oxidoreductase 75 kDa subunit, mitochondrial OS=Mus musculus OX=10090 GN=Ndufs1 PE=1 SV=2	1	8	8	8	5	8	5	8	5	8	17.3	17.3	17.3	79.776	727	727	0	64.672	By MS/MS	By MS/MS	9.2	17.3	170850000	21717000	149140000	4068000	517080	3550900	30238000	91111000	2	8	10				495	288;646;1088;1108;1480;1612;4140;4626	True;True;True;True;True;True;True;True	314;690;1157;1178;1574;1714;4431;4941	785;786;1700;2816;2817;2870;2871;3849;4161;4162;11439;11440;12684	677;1472;2448;2449;2508;2509;3376;3641;10139;11244
Q91VE6	Q91VE6	6	6	6	MKI67 FHA domain-interacting nucleolar phosphoprotein	Nifk	sp|Q91VE6|MK67I_MOUSE MKI67 FHA domain-interacting nucleolar phosphoprotein OS=Mus musculus OX=10090 GN=Nifk PE=1 SV=1	1	6	6	6	4	6	4	6	4	6	25.6	25.6	25.6	36.265	317	317	0	50.135	By MS/MS	By MS/MS	16.4	25.6	289800000	137100000	152700000	16100000	7616900	8483100	152600000	86512000	3	6	9				496	164;1417;1418;1609;1616;3189	True;True;True;True;True;True	177;1511;1512;1711;1718;3426	435;436;437;438;3685;3686;3687;3688;4157;4171;4172;8805	378;379;380;381;3222;3223;3637;3646;3647;7840
Q91VN4	Q91VN4	2	2	2	MICOS complex subunit Mic25	Chchd6	sp|Q91VN4|MIC25_MOUSE MICOS complex subunit Mic25 OS=Mus musculus OX=10090 GN=Chchd6 PE=1 SV=2	1	2	2	2	0	2	0	2	0	2	9.9	9.9	9.9	29.852	273	273	0	10.941		By MS/MS	0	9.9	21369000	0	21369000	1780700	0	1780700	0	14276000	0	1	1				497	2760;3444	True;True	2937;3696	7498;9540	6711;8453
Q91VR2	Q91VR2	4	4	4	ATP synthase subunit gamma, mitochondrial	Atp5c1	sp|Q91VR2|ATPG_MOUSE ATP synthase subunit gamma, mitochondrial OS=Mus musculus OX=10090 GN=Atp5f1c PE=1 SV=1	1	4	4	4	2	4	2	4	2	4	16.1	16.1	16.1	32.886	298	298	0	39.106	By MS/MS	By MS/MS	8.1	16.1	172500000	50424000	122070000	14375000	4202000	10173000	55459000	76517000	1	4	5				498	938;1453;3920;4554	True;True;True;True	1002;1547;4198;4865	2470;3769;3770;10834;12502;12503	2152;3300;9588;11084;11085
Q91VR5	Q91VR5	4	4	4	ATP-dependent RNA helicase DDX1	Ddx1	sp|Q91VR5|DDX1_MOUSE ATP-dependent RNA helicase DDX1 OS=Mus musculus OX=10090 GN=Ddx1 PE=1 SV=1	1	4	4	4	3	4	3	4	3	4	8.9	8.9	8.9	82.499	740	740	0	32.014	By matching	By MS/MS	6.5	8.9	63237000	16298000	46939000	1621500	417910	1203600	16952000	30704000	0	5	5				499	794;946;1407;1414	True;True;True;True	851;1010;1501;1508	2098;2099;2488;2489;3663;3664;3680;3681	1821;2164;3205;3206;3219
Q91VY9	Q91VY9	3	3	3	Zinc finger protein 622	Znf622	sp|Q91VY9|ZN622_MOUSE Zinc finger protein 622 OS=Mus musculus OX=10090 GN=Znf622 PE=1 SV=1	1	3	3	3	3	3	3	3	3	3	9.7	9.7	9.7	53.451	476	476	0	19.343	By MS/MS	By MS/MS	9.7	9.7	57413000	28410000	29003000	2734000	1352900	1381100	24683000	23103000	1	2	3				500	31;1466;4270	True;True;True	33;1560;4565	67;68;3820;3821;11803;11804	57;3352;10467;10468
Q91WK2	Q91WK2	2	2	2	Eukaryotic translation initiation factor 3 subunit H	Eif3h	sp|Q91WK2|EIF3H_MOUSE Eukaryotic translation initiation factor 3 subunit H OS=Mus musculus OX=10090 GN=Eif3h PE=1 SV=1	1	2	2	2	2	1	2	1	2	1	8.5	8.5	8.5	39.832	352	352	0	11.136	By MS/MS	By matching	8.5	5.7	43204000	30112000	13092000	2160200	1505600	654620	30112000	0	2	0	2				501	2439;3467	True;True	2596;3721	6636;9611;9612	5897;8527
Q91X78	Q91X78	4	4	1	Erlin-1	Erlin1	sp|Q91X78|ERLN1_MOUSE Erlin-1 OS=Mus musculus OX=10090 GN=Erlin1 PE=1 SV=1	1	4	4	1	2	4	2	4	0	1	15.9	15.9	6.9	38.936	346	346	0	32.91	By MS/MS	By MS/MS	5.5	15.9	81331000	18792000	62539000	4280600	989040	3291600	19811000	40761000	0	4	4				502	1379;2004;2600;3797	True;True;True;True	1471;2132;2764;4069	3579;5367;7085;7086;10498;10499	3130;4759;6361;6362;9283
Q91YK2	Q91YK2	9	9	9	Ribosomal RNA processing protein 1 homolog B	Rrp1b	sp|Q91YK2|RRP1B_MOUSE Ribosomal RNA processing protein 1 homolog B OS=Mus musculus OX=10090 GN=Rrp1b PE=1 SV=2	1	9	9	9	9	8	9	8	9	8	16.9	16.9	16.9	80.581	724	724	0	72.301	By MS/MS	By MS/MS	16.9	14.8	475820000	329580000	146240000	12201000	8450900	3749700	314790000	112490000	9	3	12				503	698;1190;2454;3125;3550;3564;4042;4133;4427	True;True;True;True;True;True;True;True;True	751;1270;2612;3359;3816;3831;4324;4423;4732	1851;1852;3084;3085;6672;6673;8650;8651;9836;9837;9838;9862;9863;11154;11418;11419;12212;12213	1612;2707;5932;5933;7707;8717;8718;8739;8740;9878;10122;10835;10836
Q91YN9	Q91YN9	5	5	5	BAG family molecular chaperone regulator 2	Bag2	sp|Q91YN9|BAG2_MOUSE BAG family molecular chaperone regulator 2 OS=Mus musculus OX=10090 GN=Bag2 PE=1 SV=1	1	5	5	5	4	5	4	5	4	5	21	21	21	23.473	210	210	0	34.579	By MS/MS	By MS/MS	16.2	21	356770000	90616000	266160000	25484000	6472600	19011000	102030000	166390000	3	6	9				504	1224;1225;1868;2588;3646	True;True;True;True;True	1311;1312;1986;2752;3915	3200;3201;3202;3203;3204;3205;4931;4932;7058;7059;10097	2807;2808;2809;2810;2811;4352;6334;6335;8947
Q91YQ5	Q91YQ5	10	10	10	Dolichyl-diphosphooligosaccharide--protein glycosyltransferase subunit 1	Rpn1	sp|Q91YQ5|RPN1_MOUSE Dolichyl-diphosphooligosaccharide--protein glycosyltransferase subunit 1 OS=Mus musculus OX=10090 GN=Rpn1 PE=1 SV=1	1	10	10	10	8	10	8	10	8	10	26.6	26.6	26.6	68.527	608	608	0	95.811	By MS/MS	By MS/MS	20.7	26.6	460120000	110750000	349370000	12436000	2993200	9442400	122880000	221270000	4	11	15				505	325;392;460;607;1263;1778;2016;3021;3921;4127	True;True;True;True;True;True;True;True;True;True	354;426;497;651;1352;1894;2145;3245;4199;4417	885;886;887;1052;1053;1206;1207;1584;3308;3309;4691;4692;5396;5397;8372;8373;10835;11405;11406	759;760;912;1044;1374;2906;2907;4141;4142;4786;7471;7472;9589;10112;10113
Q91YT7;P59326	Q91YT7;P59326	2;1	2;1	2;1	YTH domain-containing family protein 2;YTH domain-containing family protein 1	YTHDF2;Ythdf2;Ythdf1	sp|Q91YT7|YTHD2_MOUSE YTH domain-containing family protein 2 OS=Mus musculus OX=10090 GN=Ythdf2 PE=1 SV=1;sp|P59326|YTHD1_MOUSE YTH domain-containing f	3	2	2	2	2	2	2	2	2	2	4.3	4.3	4.3	62.333	579	579;579;559	0	25.205	By MS/MS	By MS/MS	4.3	4.3	75665000	45977000	29687000	3783200	2298900	1484400	44878000	20932000	1	1	2				506	1732;3465	True;True	1845;3719	4554;4555;9607;9608	4012;8524
Q91YU8	Q91YU8	2	2	2	Suppressor of SWI4 1 homolog	Ppan	sp|Q91YU8|SSF1_MOUSE Suppressor of SWI4 1 homolog OS=Mus musculus OX=10090 GN=Ppan PE=1 SV=2	1	2	2	2	2	2	2	2	2	2	5.7	5.7	5.7	52.755	470	470	0	15.914	By MS/MS	By MS/MS	5.7	5.7	84464000	46168000	38296000	4022100	2198500	1823600	46499000	25253000	2	2	4				507	1541;3209	True;True	1640;3448	3999;4000;8862;8863	3501;3502;7889;7890
Q91Z49	Q91Z49	5	5	5	UAP56-interacting factor	Fyttd1	sp|Q91Z49|UIF_MOUSE UAP56-interacting factor OS=Mus musculus OX=10090 GN=Fyttd1 PE=1 SV=1	1	5	5	5	4	5	4	5	4	5	17.4	17.4	17.4	35.887	317	317	0	37.86	By MS/MS	By MS/MS	17.4	17.4	196780000	61684000	135090000	13119000	4112300	9006300	65739000	86196000	3	5	8				508	1598;2815;4451;4452;4582	True;True;True;True;True	1699;2996;4756;4757;4894	4137;4138;7710;7711;12261;12262;12263;12574;12575	3616;3617;6890;6891;10881;10882;10883;11153
Q921F2	Q921F2	5	5	5	TAR DNA-binding protein 43	Tardbp	sp|Q921F2|TADBP_MOUSE TAR DNA-binding protein 43 OS=Mus musculus OX=10090 GN=Tardbp PE=1 SV=1	1	5	5	5	2	4	2	4	2	4	24.6	24.6	24.6	44.547	414	414	0	69.359	By MS/MS	By MS/MS	7.2	21.7	67671000	32647000	35024000	5205400	2511300	2694200	0	23398000	2	3	5				509	1136;1434;2812;4050;4489	True;True;True;True;True	1206;1528;2993;4332;4797	2933;2934;3721;7705;11168;12356	2574;2575;3247;6886;9889;10957
Q921L3	Q921L3	2	2	2	Transmembrane and coiled-coil domain-containing protein 1	Tmco1	sp|Q921L3|TMCO1_MOUSE Calcium load-activated calcium channel OS=Mus musculus OX=10090 GN=Tmco1 PE=1 SV=1	1	2	2	2	2	2	2	2	2	2	12.2	12.2	12.2	21.175	188	188	0	19.667	By MS/MS	By MS/MS	12.2	12.2	74945000	30544000	44401000	12491000	5090700	7400200	0	29663000	1	1	2				510	1927;2680	True;True	2048;2857	5130;5131;7318;7319	4530;4531;6560;6561
Q921M3	Q921M3	7	7	7	Splicing factor 3B subunit 3	Sf3b3	sp|Q921M3|SF3B3_MOUSE Splicing factor 3B subunit 3 OS=Mus musculus OX=10090 GN=Sf3b3 PE=1 SV=1	1	7	7	7	7	7	7	7	7	7	7.7	7.7	7.7	135.55	1217	1217	0	68.409	By MS/MS	By MS/MS	7.7	7.7	287530000	116990000	170540000	5529400	2249800	3279600	115290000	115630000	6	7	13				511	1171;2047;2455;2853;4033;4094;4609	True;True;True;True;True;True;True	1249;2178;2613;3036;4315;4381;4923	3038;3039;5488;5489;6674;6675;7805;7806;11134;11135;11136;11137;11324;11325;12636;12637	2666;2667;4870;4871;5934;6972;9862;9863;9864;9865;10037;10038;11203
Q921N6	Q921N6	2	2	2	Probable ATP-dependent RNA helicase DDX27	Ddx27	sp|Q921N6|DDX27_MOUSE Probable ATP-dependent RNA helicase DDX27 OS=Mus musculus OX=10090 GN=Ddx27 PE=1 SV=3	1	2	2	2	1	2	1	2	1	2	3	3	3	85.938	760	760	0	20.153	By matching	By MS/MS	1.8	3	15653000	3575100	12078000	364020	83142	280880	0	8068600	0	1	1				512	1827;2913	True;True	1944;3112	4825;4826;8008	4265;7149
Q921S7	Q921S7	6	6	6	39S ribosomal protein L37, mitochondrial	Mrpl37	sp|Q921S7|RM37_MOUSE 39S ribosomal protein L37, mitochondrial OS=Mus musculus OX=10090 GN=Mrpl37 PE=1 SV=1	1	6	6	6	5	5	5	5	5	5	25.3	25.3	25.3	48.34	423	423	0	49.122	By MS/MS	By MS/MS	19.4	22.2	227050000	97060000	129990000	7568400	3235300	4333100	61131000	122770000	2	7	9				513	1041;1582;3071;3552;4350;4544	True;True;True;True;True;True	1110;1682;3296;3818;4649;4855	2715;2716;2717;2718;4098;4099;8499;9841;9842;12005;12006;12476;12477	2360;2361;3583;3584;7579;8721;8722;10655;10656;11057
Q922B2	Q922B2	6	6	6	Aspartate--tRNA ligase, cytoplasmic	Dars	sp|Q922B2|SYDC_MOUSE Aspartate--tRNA ligase, cytoplasmic OS=Mus musculus OX=10090 GN=Dars PE=1 SV=2	1	6	6	6	6	2	6	2	6	2	14	14	14	57.147	501	501	0	37.423	By MS/MS	By MS/MS	14	5.2	59808000	51248000	8559600	1661300	1423600	237770	51248000	0	2	0	2				514	263;898;1180;1891;2072;3082	True;True;True;True;True;True	286;961;1260;2010;2204;3309	728;2361;3061;3062;5003;5004;5549;8530	638;2054;2686;4415;4926;7606
Q922J9	Q922J9	2	2	2	Fatty acyl-CoA reductase 1	Far1	sp|Q922J9|FACR1_MOUSE Fatty acyl-CoA reductase 1 OS=Mus musculus OX=10090 GN=Far1 PE=1 SV=1	1	2	2	2	2	0	2	0	2	0	4.9	4.9	4.9	59.434	515	515	0	11.473	By MS/MS		4.9	0	10785000	10785000	0	371880	371880	0	10785000	0	1	0	1				515	1863;3015	True;True	1981;3239	4921;8353	4343;7454
Q922K7	Q922K7	7	7	3	Probable 28S rRNA (cytosine-C(5))-methyltransferase	Nop2	sp|Q922K7|NOP2_MOUSE Probable 28S rRNA (cytosine-C(5))-methyltransferase OS=Mus musculus OX=10090 GN=Nop2 PE=1 SV=1	1	7	7	3	7	6	7	6	3	3	12.1	12.1	5.5	86.751	793	793	0	59.662	By MS/MS	By MS/MS	12.1	11.1	352970000	241210000	111760000	12171000	8317600	3853700	220490000	95380000	8	4	12				516	630;949;2488;2833;3130;3802;4364	True;True;True;True;True;True;True	674;1013;2648;3014;3364;4074;4663	1655;1656;2493;2494;2495;2496;6746;6747;7759;7760;8658;8659;10508;12032;12033	1433;1434;2168;2169;2170;5995;6932;6933;7713;9290;10676;10677
Q922Q8	Q922Q8	5	5	5	Leucine-rich repeat-containing protein 59	Lrrc59	sp|Q922Q8|LRC59_MOUSE Leucine-rich repeat-containing protein 59 OS=Mus musculus OX=10090 GN=Lrrc59 PE=1 SV=1	1	5	5	5	5	5	5	5	5	5	23.8	23.8	23.8	34.877	307	307	0	34.569	By MS/MS	By MS/MS	23.8	23.8	217100000	99245000	117850000	15507000	7088900	8418200	100410000	77564000	5	3	8				517	425;2716;2829;4491;4586	True;True;True;True;True	459;2893;3010;4799;4898	1113;1114;7389;7390;7749;7750;12358;12359;12581;12582;12583;12584	963;6621;6926;6927;10959;11158;11159;11160
Q922R8	Q922R8	3	3	3	Protein disulfide-isomerase A6	Pdia6	sp|Q922R8|PDIA6_MOUSE Protein disulfide-isomerase A6 OS=Mus musculus OX=10090 GN=Pdia6 PE=1 SV=3	1	3	3	3	2	3	2	3	2	3	9.5	9.5	9.5	48.1	440	440	0	25.588	By MS/MS	By MS/MS	6.6	9.5	52257000	15128000	37129000	3073900	889900	2184000	15029000	24903000	1	3	4				518	1560;2317;3896	True;True;True	1660;2464;4174	4045;6311;6312;10770;10771	3537;5616;9514;9515
Q922U1	Q922U1	3	3	3	U4/U6 small nuclear ribonucleoprotein Prp3	Prpf3	sp|Q922U1|PRPF3_MOUSE U4/U6 small nuclear ribonucleoprotein Prp3 OS=Mus musculus OX=10090 GN=Prpf3 PE=1 SV=1	1	3	3	3	3	3	3	3	3	3	5.3	5.3	5.3	77.454	683	683	0	18.001	By MS/MS	By matching	5.3	5.3	46370000	33717000	12653000	1405200	1021700	383440	34919000	7251100	2	0	2				519	1264;2476;3286	True;True;True	1353;2635;3527	3310;3311;6725;6726;9051;9052	2908;5980;8055
Q923D2	Q923D2	2	2	2	Flavin reductase (NADPH)	Blvrb	sp|Q923D2|BLVRB_MOUSE Flavin reductase (NADPH) OS=Mus musculus OX=10090 GN=Blvrb PE=1 SV=3	1	2	2	2	0	2	0	2	0	2	12.1	12.1	12.1	22.197	206	206	0	28.501		By MS/MS	0	12.1	136350000	0	136350000	11363000	0	11363000	0	91092000	0	3	3				520	1945;2689	True;True	2067;2866	5165;7334;7335	4559;6575;6576
Q924T2	Q924T2	3	3	3	28S ribosomal protein S2, mitochondrial	Mrps2	sp|Q924T2|RT02_MOUSE 28S ribosomal protein S2, mitochondrial OS=Mus musculus OX=10090 GN=Mrps2 PE=1 SV=1	1	3	3	3	3	3	3	3	3	3	16.5	16.5	16.5	32.313	291	291	0	40.524	By MS/MS	By MS/MS	16.5	16.5	99820000	23872000	75949000	7130000	1705100	5424900	30672000	43938000	3	2	5				521	1390;1558;1921	True;True;True	1483;1658;2042	3613;3614;4042;4043;5113;5114;5115;5116;5117	3156;3535;4518;4519;4520
Q925I1	Q925I1	3	3	3	ATPase family AAA domain-containing protein 3	Atad3	sp|Q925I1|ATAD3_MOUSE ATPase family AAA domain-containing protein 3 OS=Mus musculus OX=10090 GN=Atad3 PE=1 SV=1	1	3	3	3	3	3	3	3	3	3	6.1	6.1	6.1	66.741	591	591	0	19.857	By MS/MS	By MS/MS	6.1	6.1	31526000	17509000	14018000	955350	530560	424780	0	9364700	1	0	1				522	2014;2845;3806	True;True;True	2143;3028;4078	5393;5394;7789;7790;10514;10515	4784;6960;9296
Q93092	Q93092	2	2	2	Transaldolase	Taldo1	sp|Q93092|TALDO_MOUSE Transaldolase OS=Mus musculus OX=10090 GN=Taldo1 PE=1 SV=2	1	2	2	2	1	2	1	2	1	2	5.6	5.6	5.6	37.387	337	337	0	11.901	By matching	By MS/MS	3.3	5.6	64583000	2814200	61769000	3799000	165540	3633500	0	41265000	0	2	2				523	2337;3812	True;True	2487;4085	6364;10534;10535	5653;9311
Q99J72	Q99J72	2	2	2	DNA dC->dU-editing enzyme APOBEC-3	Apobec3	sp|Q99J72|ABEC3_MOUSE DNA dC->dU-editing enzyme APOBEC-3 OS=Mus musculus OX=10090 GN=Apobec3 PE=1 SV=3	1	2	2	2	2	2	2	2	2	2	3.9	3.9	3.9	52.213	440	440	0	12.053	By MS/MS	By MS/MS	3.9	3.9	70102000	38856000	31246000	3505100	1942800	1562300	38674000	21056000	1	1	2				524	709;1462	True;True	763;1556	1880;1881;3812;3813	1634;3348
Q99JB2	Q99JB2	2	2	2	Stomatin-like protein 2, mitochondrial	Stoml2	sp|Q99JB2|STML2_MOUSE Stomatin-like protein 2, mitochondrial OS=Mus musculus OX=10090 GN=Stoml2 PE=1 SV=1	1	2	2	2	2	2	2	2	2	2	8.2	8.2	8.2	38.384	353	353	0	13.141	By matching	By MS/MS	8.2	8.2	62000000	20142000	41858000	3444400	1119000	2325400	20594000	27511000	0	2	2				525	741;1923	True;True	795;2044	1963;1964;5120;5121	1704;4522
Q99JX4	Q99JX4	2	2	2	Eukaryotic translation initiation factor 3 subunit M	Eif3m	sp|Q99JX4|EIF3M_MOUSE Eukaryotic translation initiation factor 3 subunit M OS=Mus musculus OX=10090 GN=Eif3m PE=1 SV=1	1	2	2	2	1	2	1	2	1	2	10.2	10.2	10.2	42.516	374	374	0	25.108	By matching	By MS/MS	5.3	10.2	26207000	12962000	13245000	1541600	762460	779140	0	8848600	0	2	2				526	3792;4125	True;True	4064;4415	10492;11399;11400	9278;10107
Q99JY0	Q99JY0	3	3	3	Trifunctional enzyme subunit beta, mitochondrial;3-ketoacyl-CoA thiolase	Hadhb	sp|Q99JY0|ECHB_MOUSE Trifunctional enzyme subunit beta, mitochondrial OS=Mus musculus OX=10090 GN=Hadhb PE=1 SV=1	1	3	3	3	2	3	2	3	2	3	10.5	10.5	10.5	51.386	475	475	0	20.408	By matching	By MS/MS	7.2	10.5	58720000	17203000	41516000	2348800	688140	1660600	20728000	24210000	0	3	3				527	560;746;1974	True;True;True	601;800;2102	1463;1464;1982;5294;5295	1271;1718;4704
Q99JY9	Q99JY9	5	5	5	Actin-related protein 3	Actr3	sp|Q99JY9|ARP3_MOUSE Actin-related protein 3 OS=Mus musculus OX=10090 GN=Actr3 PE=1 SV=3	1	5	5	5	5	5	5	5	5	5	25.6	25.6	25.6	47.357	418	418	0	60.745	By MS/MS	By MS/MS	25.6	25.6	440270000	326900000	113380000	20965000	15567000	5398800	324080000	78562000	6	6	12				528	114;1589;2490;2671;3998	True;True;True;True;True	124;1690;2650;2848;4279	308;309;4121;4122;6750;6751;6752;6753;7301;7302;11047;11048	267;268;3604;3605;5997;5998;5999;6000;6547;6548;9789;9790
Q99K85	Q99K85	2	2	2	Phosphoserine aminotransferase	Psat1	sp|Q99K85|SERC_MOUSE Phosphoserine aminotransferase OS=Mus musculus OX=10090 GN=Psat1 PE=1 SV=1	1	2	2	2	2	2	2	2	2	2	6.5	6.5	6.5	40.472	370	370	0	13.223	By matching	By MS/MS	6.5	6.5	51943000	16490000	35453000	2597100	824500	1772600	16523000	23651000	0	2	2				529	383;944	True;True	417;1008	1036;1037;2484;2485	901;2162
Q99KI0	Q99KI0	9	9	9	Aconitate hydratase, mitochondrial	Aco2	sp|Q99KI0|ACON_MOUSE Aconitate hydratase, mitochondrial OS=Mus musculus OX=10090 GN=Aco2 PE=1 SV=1	1	9	9	9	5	9	5	9	5	9	16.5	16.5	16.5	85.462	780	780	0	60.391	By matching	By MS/MS	9.1	16.5	131720000	18327000	113390000	3466300	482280	2984100	22340000	71741000	0	9	9				530	223;604;866;1205;2777;2968;2976;3238;4143	True;True;True;True;True;True;True;True;True	243;648;927;1290;2954;3187;3196;3479;4434	616;617;1578;1579;1580;2265;3150;3151;7541;8182;8183;8213;8214;8934;11443	547;1369;1370;1972;2759;6744;7292;7320;7952;10142
Q99KK7	Q99KK7	2	2	2	Dipeptidyl peptidase 3	Dpp3	sp|Q99KK7|DPP3_MOUSE Dipeptidyl peptidase 3 OS=Mus musculus OX=10090 GN=Dpp3 PE=1 SV=2	1	2	2	2	2	2	2	2	2	2	5.1	5.1	5.1	82.897	738	738	0	16.064	By matching	By MS/MS	5.1	5.1	24152000	5423300	18728000	670880	150650	520230	4732200	13203000	0	2	2				531	2351;2412	True;True	2501;2567	6403;6404;6572;6573	5683;5838
Q99KN9	Q99KN9	16	16	16	Clathrin interactor 1	Clint1	sp|Q99KN9|EPN4_MOUSE Clathrin interactor 1 OS=Mus musculus OX=10090 GN=Clint1 PE=1 SV=2	1	16	16	16	13	16	13	16	13	16	30.1	30.1	30.1	68.512	631	631	0	323.31	By MS/MS	By MS/MS	25.4	30.1	2041100000	359980000	1681100000	97195000	17142000	80054000	380020000	1103000000	11	26	37				532	387;626;797;867;971;1340;1665;2461;3213;3456;3614;3615;3629;3928;4312;4770	True;True;True;True;True;True;True;True;True;True;True;True;True;True;True;True	421;670;854;928;1035;1431;1769;2619;3452;3709;3883;3884;3898;4207;4610;5095	1042;1043;1644;1645;1646;1647;2103;2266;2267;2554;2555;2556;3498;3499;3500;4310;4311;4312;4313;6694;6695;6696;6697;8870;8871;9579;9580;10029;10030;10031;10032;10033;10034;10035;10066;10856;10857;10858;10859;11908;11909;11910;11911;13017;13018	905;1425;1426;1427;1825;1973;1974;2223;2224;3061;3062;3063;3781;3782;3783;3784;5953;5954;5955;5956;7896;7897;8494;8495;8885;8886;8887;8888;8889;8890;8891;8919;9607;9608;9609;10559;10560;10561;11540;11541
Q99KP6;Q9UMS4	Q99KP6;Q9UMS4	6;3	6;3	6;3	Pre-mRNA-processing factor 19	Prpf19;PRPF19	sp|Q99KP6|PRP19_MOUSE Pre-mRNA-processing factor 19 OS=Mus musculus OX=10090 GN=Prpf19 PE=1 SV=1;sp|Q9UMS4|PRP19_HUMAN Pre-mRNA-processing factor 19 OS=Homo	3	6	6	6	6	6	6	6	6	6	19.6	19.6	19.6	55.238	504	504;504;504	0	57.748	By MS/MS	By MS/MS	19.6	19.6	246680000	105350000	141330000	12983000	5544600	7438600	96454000	103310000	6	7	13				533	2062;2293;3625;3760;3987;4100	True;True;True;True;True;True	2194;2439;3894;4032;4268;4388	5532;5533;6244;6245;10059;10060;10407;10408;11000;11001;11338;11339;11340;11341	4910;4911;4912;5550;8912;8913;9210;9211;9731;9732;10050;10051;10052;10053
Q99L45	Q99L45	2	2	2	Eukaryotic translation initiation factor 2 subunit 2	Eif2s2	sp|Q99L45|IF2B_MOUSE Eukaryotic translation initiation factor 2 subunit 2 OS=Mus musculus OX=10090 GN=Eif2s2 PE=1 SV=1	1	2	2	2	2	2	2	2	2	2	9.1	9.1	9.1	38.092	331	331	0	14.072	By MS/MS	By MS/MS	9.1	9.1	24688000	10309000	14378000	1234400	515460	718920	0	9605600	1	1	2				534	530;1814	True;True	570;1931	1371;1372;4800;4801	1190;1191;4245
Q99LE6	Q99LE6	8	8	8	ATP-binding cassette sub-family F member 2	Abcf2	sp|Q99LE6|ABCF2_MOUSE ATP-binding cassette sub-family F member 2 OS=Mus musculus OX=10090 GN=Abcf2 PE=1 SV=1	1	8	8	8	7	8	7	8	7	8	15.8	15.8	15.8	71.781	628	628	0	52.083	By MS/MS	By MS/MS	14	15.8	339470000	116370000	223100000	9984300	3422700	6561600	109760000	155660000	8	7	15				535	1059;1976;2631;2809;3993;4596;4656;4780	True;True;True;True;True;True;True;True	1128;2104;2799;2990;4274;4908;4973;5105	2746;2747;2748;2749;5298;5299;5300;5301;7165;7166;7699;7700;11013;12598;12599;12746;12747;13039;13040	2385;2386;2387;2388;4706;4707;4708;4709;6432;6880;6881;9741;11171;11299;11564;11565
Q99LF4	Q99LF4	2	2	2	tRNA-splicing ligase RtcB homolog	Rtcb	sp|Q99LF4|RTCB_MOUSE tRNA-splicing ligase RtcB homolog OS=Mus musculus OX=10090 GN=Rtcb PE=1 SV=1	1	2	2	2	2	2	2	2	2	2	7.3	7.3	7.3	55.249	505	505	0	13.672	By MS/MS	By MS/MS	7.3	7.3	38509000	17633000	20875000	1604500	734720	869810	16915000	14665000	1	2	3				536	3248;4229	True;True	3489;4523	8955;8956;11687;11688	7969;7970;10361
Q99LH1	Q99LH1	3	3	3	Nucleolar GTP-binding protein 2	Gnl2	sp|Q99LH1|NOG2_MOUSE Nucleolar GTP-binding protein 2 OS=Mus musculus OX=10090 GN=Gnl2 PE=1 SV=2	1	3	3	3	3	2	3	2	3	2	5.6	5.6	5.6	83.345	728	728	0	20.81	By MS/MS	By MS/MS	5.6	4.5	110070000	76974000	33092000	3144700	2199300	945480	73112000	25969000	4	3	7				537	1302;4277;4289	True;True;True	1391;4572;4585	3401;11816;11817;11818;11819;11843;11844	2984;10478;10479;10480;10481;10498;10499
Q99LL5	Q99LL5	7	7	7	Periodic tryptophan protein 1 homolog	Pwp1	sp|Q99LL5|PWP1_MOUSE Periodic tryptophan protein 1 homolog OS=Mus musculus OX=10090 GN=Pwp1 PE=1 SV=1	1	7	7	7	6	7	6	7	6	7	22.2	22.2	22.2	55.586	501	501	0	85.011	By MS/MS	By MS/MS	19.8	22.2	346590000	83893000	262700000	15754000	3813300	11941000	84961000	174430000	4	8	12				538	708;1018;1033;2059;3334;4449;4545	True;True;True;True;True;True;True	762;1087;1102;2191;3578;4754;4856	1876;1877;1878;1879;2669;2703;2704;5518;5519;5520;5521;9172;9173;12257;12258;12478;12479;12480	1630;1631;1632;1633;2323;2350;4899;4900;8155;10877;10878;11058;11059
Q99LX0;Q99497	Q99LX0	7;3	7;3	7;3	Protein deglycase DJ-1	Park7	sp|Q99LX0|PARK7_MOUSE Protein/nucleic acid deglycase DJ-1 OS=Mus musculus OX=10090 GN=Park7 PE=1 SV=1	2	7	7	7	1	7	1	7	1	7	50.3	50.3	50.3	20.021	189	189;189	0	50.551	By matching	By MS/MS	3.7	50.3	274680000	4519200	270160000	22890000	376600	22514000	0	180480000	0	8	8				539	299;334;736;1471;2141;4037;4504	True;True;True;True;True;True;True	325;363;790;1565;2278;4319;4814	812;813;918;1950;3829;5746;11147;12392;12393	700;793;1695;3358;5110;9873;10988;10989
Q99M28	Q99M28	2	2	2	RNA-binding protein with serine-rich domain 1	Rnps1	sp|Q99M28|RNPS1_MOUSE RNA-binding protein with serine-rich domain 1 OS=Mus musculus OX=10090 GN=Rnps1 PE=1 SV=1	1	2	2	2	1	2	1	2	1	2	8.9	8.9	8.9	34.208	305	305	0	24.726	By matching	By MS/MS	4.9	8.9	90153000	15389000	74764000	7512800	1282400	6230300	0	49947000	0	2	2				540	592;1617	True;True	636;1719	1548;4173;4174	1342;3648
Q99ME9;Q9C6I8	Q99ME9	7;1	7;1	7;1	Nucleolar GTP-binding protein 1	Gtpbp4	sp|Q99ME9|NOG1_MOUSE Nucleolar GTP-binding protein 1 OS=Mus musculus OX=10090 GN=Gtpbp4 PE=1 SV=3	2	7	7	7	7	6	7	6	7	6	12.3	12.3	12.3	74.112	634	634;671	0	48.467	By MS/MS	By MS/MS	12.3	11.2	432540000	228920000	203630000	12722000	6732800	5989000	239350000	125600000	6	5	11				541	94;190;540;2037;2190;2751;3976	True;True;True;True;True;True;True	99;207;580;2168;2330;2928;4256	233;234;519;1406;1407;5449;5450;5901;5902;5903;5904;7477;7478;10970;10971	199;200;453;1221;4832;5252;5253;5254;6694;6695;9707;9708
Q99MJ9	Q99MJ9	4	4	4	ATP-dependent RNA helicase DDX50	Ddx50	sp|Q99MJ9|DDX50_MOUSE ATP-dependent RNA helicase DDX50 OS=Mus musculus OX=10090 GN=Ddx50 PE=2 SV=1	1	4	4	4	2	4	2	4	2	4	8.4	8.4	8.4	82.175	734	734	0	30.268	By matching	By MS/MS	4.4	8.4	55235000	4367100	50868000	1453600	114920	1338600	5638300	32711000	0	4	4				542	1313;3602;3890;4389	True;True;True;True	1404;3871;4168;4690	3433;3434;9994;10758;12104;12105	3008;8849;9506;10741
Q99N84	Q99N84	2	2	2	28S ribosomal protein S18b, mitochondrial	Mrps18b	sp|Q99N84|RT18B_MOUSE 28S ribosomal protein S18b, mitochondrial OS=Mus musculus OX=10090 GN=Mrps18b PE=1 SV=1	1	2	2	2	2	2	2	2	2	2	9.8	9.8	9.8	28.702	254	254	0	15.23	By MS/MS	By MS/MS	9.8	9.8	70221000	25097000	45124000	7022100	2509700	4512400	26258000	28984000	2	2	4				543	809;4135	True;True	866;4425	2134;2135;11422;11423	1854;1855;1856;10124
Q99N85	Q99N85	4	4	4	28S ribosomal protein S18a, mitochondrial	Mrps18a	sp|Q99N85|RT18A_MOUSE 28S ribosomal protein S18a, mitochondrial OS=Mus musculus OX=10090 GN=Mrps18a PE=2 SV=1	1	4	4	4	3	4	3	4	3	4	30.1	30.1	30.1	22.321	196	196	0	26.827	By matching	By MS/MS	23	30.1	103850000	18889000	84965000	10385000	1888900	8496500	16045000	59605000	0	4	4				544	165;415;4251;4763	True;True;True;True	178;449;4545;5088	439;440;1094;1095;11738;11739;12999	382;947;10410;11522
Q99N87	Q99N87	3	3	3	28S ribosomal protein S5, mitochondrial	Mrps5	sp|Q99N87|RT05_MOUSE 28S ribosomal protein S5, mitochondrial OS=Mus musculus OX=10090 GN=Mrps5 PE=1 SV=1	1	3	3	3	2	1	2	1	2	1	10	10	10	48.206	432	432	0	18.375	By MS/MS	By MS/MS	6.7	3.2	42152000	24021000	18130000	1686100	960860	725210	24021000	0	2	1	3				545	988;3524;3542	True;True;True	1054;3788;3807	2591;9780;9817	2253;8671;8701
Q99N93	Q99N93	2	2	2	39S ribosomal protein L16, mitochondrial	Mrpl16	sp|Q99N93|RM16_MOUSE 39S ribosomal protein L16, mitochondrial OS=Mus musculus OX=10090 GN=Mrpl16 PE=1 SV=1	1	2	2	2	2	2	2	2	2	2	10.8	10.8	10.8	28.803	251	251	0	13.508	By MS/MS	By MS/MS	10.8	10.8	129770000	41793000	87977000	12977000	4179300	8797700	40693000	59874000	2	1	3				546	1306;3977	True;True	1397;4257	3412;3413;10972;10973;10974;10975	2994;9709;9710;9711
Q99N94	Q99N94	6	6	6	39S ribosomal protein L9, mitochondrial	Mrpl9	sp|Q99N94|RM09_MOUSE 39S ribosomal protein L9, mitochondrial OS=Mus musculus OX=10090 GN=Mrpl9 PE=1 SV=2	1	6	6	6	4	6	4	6	4	6	30.6	30.6	30.6	30.244	265	265	0	38.083	By MS/MS	By MS/MS	17.7	30.6	194100000	58550000	135550000	11418000	3444100	7973400	57781000	91323000	0	4	4				547	675;2628;2675;3051;4433;4581	True;True;True;True;True;True	727;2796;2852;3276;4738;4893	1792;7159;7160;7310;7311;8455;8456;12221;12222;12573	1556;6427;6554;7541;7542;10843;11152
Q99N95	Q99N95	3	3	3	39S ribosomal protein L3, mitochondrial	Mrpl3	sp|Q99N95|RM03_MOUSE 39S ribosomal protein L3, mitochondrial OS=Mus musculus OX=10090 GN=Mrpl3 PE=1 SV=1	1	3	3	3	2	3	2	3	2	3	11.5	11.5	11.5	39.109	348	348	0	16.789	By matching	By MS/MS	6.3	11.5	103860000	27255000	76607000	5193100	1362700	3830300	0	51178000	0	2	2				548	1633;3752;4248	True;True;True	1735;4024;4542	4208;4209;10391;11730;11731	3676;9197;10400
Q99N96	Q99N96	5	5	5	39S ribosomal protein L1, mitochondrial	Mrpl1	sp|Q99N96|RM01_MOUSE 39S ribosomal protein L1, mitochondrial OS=Mus musculus OX=10090 GN=Mrpl1 PE=1 SV=2	1	5	5	5	3	5	3	5	3	5	23.5	23.5	23.5	37.596	336	336	0	34.555	By MS/MS	By MS/MS	10.1	23.5	182220000	53991000	128230000	10123000	2999500	7123800	61324000	78330000	2	5	7				549	1764;3751;4049;4086;4159	True;True;True;True;True	1880;4023;4331;4372;4450	4662;10389;10390;11166;11167;11296;11495;11496	4119;9195;9196;9888;10011;10193;10194
Q99NB9	Q99NB9	5	5	5	Splicing factor 3B subunit 1	Sf3b1	sp|Q99NB9|SF3B1_MOUSE Splicing factor 3B subunit 1 OS=Mus musculus OX=10090 GN=Sf3b1 PE=1 SV=1	1	5	5	5	5	4	5	4	5	4	6.8	6.8	6.8	145.81	1304	1304	0	38.275	By MS/MS	By MS/MS	6.8	5.1	141780000	66092000	75684000	2286700	1066000	1220700	55268000	61385000	1	4	5				550	1082;2635;3787;3868;4236	True;True;True;True;True	1151;2803;4059;4143;4530	2804;2805;7175;7176;10480;10684;10685;11710;11711	2437;6440;9268;9443;10384
Q99NH0	Q99NH0	3	3	3	Ankyrin repeat domain-containing protein 17	Ankrd17	sp|Q99NH0|ANR17_MOUSE Ankyrin repeat domain-containing protein 17 OS=Mus musculus OX=10090 GN=Ankrd17 PE=1 SV=2	1	3	3	3	2	3	2	3	2	3	2.2	2.2	2.2	274.21	2603	2603	0	16.177	By MS/MS	By MS/MS	1.5	2.2	21237000	5737600	15499000	241330	65200	176130	8417000	7675000	2	1	3				551	2801;3150;3900	True;True;True	2981;3384;4178	7636;7637;8708;8709;10777	6824;7750;9519
Q99PL5	Q99PL5	7	7	7	Ribosome-binding protein 1	Rrbp1	sp|Q99PL5|RRBP1_MOUSE Ribosome-binding protein 1 OS=Mus musculus OX=10090 GN=Rrbp1 PE=1 SV=2	1	7	7	7	7	7	7	7	7	7	5.4	5.4	5.4	172.88	1605	1605	0	65.801	By MS/MS	By MS/MS	5.4	5.4	284630000	156060000	128570000	2453700	1345300	1108400	151780000	90174000	5	5	10				552	527;2714;3275;3913;3985;4205;4235	True;True;True;True;True;True;True	567;2891;3516;4191;4266;4498;4529	1363;1364;7383;7384;9027;9028;10815;10816;10997;10998;11619;11620;11621;11622;11708;11709	1183;1184;6616;8036;9570;9729;10303;10304;10305;10383
Q99PT1	Q99PT1	4	4	4	Rho GDP-dissociation inhibitor 1	Arhgdia	sp|Q99PT1|GDIR1_MOUSE Rho GDP-dissociation inhibitor 1 OS=Mus musculus OX=10090 GN=Arhgdia PE=1 SV=3	1	4	4	4	1	4	1	4	1	4	28.4	28.4	28.4	23.407	204	204	0	35.933	By matching	By MS/MS	7.8	28.4	167780000	7156300	160620000	18642000	795140	17847000	0	107300000	0	4	4				553	2789;3567;3568;4161	True;True;True;True	2966;3835;3836;4452	7574;9877;9878;11500;11501	6768;8751;8752;10198
Q99PU8	Q99PU8	21	21	21	Putative ATP-dependent RNA helicase DHX30	Dhx30	sp|Q99PU8|DHX30_MOUSE ATP-dependent RNA helicase DHX30 OS=Mus musculus OX=10090 GN=Dhx30 PE=1 SV=1	1	21	21	21	18	21	18	21	18	21	22.5	22.5	22.5	136.67	1217	1217	0	142.55	By MS/MS	By MS/MS	18.8	22.5	731760000	291100000	440650000	9628400	3830300	5798100	272910000	312570000	7	19	26				554	199;218;273;289;411;433;507;685;697;740;986;1073;1378;1611;2157;2719;2951;3054;3084;3196;4694	True;True;True;True;True;True;True;True;True;True;True;True;True;True;True;True;True;True;True;True;True	216;238;296;315;445;467;547;738;750;794;1051;1142;1470;1713;2296;2896;3169;3279;3311;3433;5012	533;534;608;609;749;750;787;788;1084;1085;1127;1128;1129;1324;1325;1831;1849;1850;1961;1962;2583;2584;2585;2586;2776;2777;3578;4159;4160;5789;7394;7395;8142;8143;8461;8462;8533;8534;8816;8817;12830;12831	466;467;541;653;678;679;940;941;974;975;1149;1595;1611;1703;2246;2247;2248;2411;3128;3129;3639;3640;5151;6625;7260;7546;7547;7608;7849;7850;11376
Q99PV0;Q9SSD2;Q9T0I6	Q99PV0	5;2;1	5;2;1	5;2;1	Pre-mRNA-processing-splicing factor 8	Prpf8	sp|Q99PV0|PRP8_MOUSE Pre-mRNA-processing-splicing factor 8 OS=Mus musculus OX=10090 GN=Prpf8 PE=1 SV=2	3	5	5	5	3	5	3	5	3	5	3.1	3.1	3.1	273.61	2335	2335;2359;2359	0	30.585	By MS/MS	By MS/MS	1.6	3.1	50465000	13705000	36760000	397360	107920	289450	14882000	23381000	1	4	5				555	1238;2603;3700;3864;4782	True;True;True;True;True	1325;2767;3971;4139;5107	3226;7091;7092;10236;10674;10675;13043;13044	2828;6365;9063;9433;9434;11567
Q9CPP0	Q9CPP0	3	3	3	Nucleoplasmin-3	Npm3	sp|Q9CPP0|NPM3_MOUSE Nucleoplasmin-3 OS=Mus musculus OX=10090 GN=Npm3 PE=1 SV=3	1	3	3	3	1	3	1	3	1	3	29.7	29.7	29.7	19.023	175	175	0	46.338	By matching	By MS/MS	8.6	29.7	70314000	6164800	64149000	8789200	770600	8018600	0	42855000	0	2	2				556	16;591;4422	True;True;True	16;635;4727	29;1546;1547;12199	26;1341;10824
Q9CPR4	Q9CPR4	20	20	20	60S ribosomal protein L17	Rpl17	sp|Q9CPR4|RL17_MOUSE 60S ribosomal protein L17 OS=Mus musculus OX=10090 GN=Rpl17 PE=1 SV=3	1	20	20	20	20	20	20	20	20	20	66.8	66.8	66.8	21.423	184	184	0	323.31	By MS/MS	By MS/MS	66.8	66.8	80962000000	32221000000	48741000000	8995800000	3580100000	5415700000	32710000000	27665000000	58	72	130				557	1002;1003;1026;1457;1458;1966;1967;2235;2236;2247;2958;2959;3212;3338;3455;4464;4695;4696;4741;4742	True;True;True;True;True;True;True;True;True;True;True;True;True;True;True;True;True;True;True;True	1070;1071;1095;1551;1552;2091;2092;2093;2094;2095;2378;2379;2391;2392;3177;3178;3451;3582;3707;3708;4772;5013;5014;5065;5066	2617;2618;2619;2620;2621;2622;2623;2624;2625;2626;2687;2688;2689;3779;3780;3781;3782;3783;3784;3785;3786;3787;3788;3789;3790;3791;3792;3793;3794;3795;3796;3797;3798;3799;3800;3801;3802;3803;3804;3805;5253;5254;5255;5256;5257;5258;5259;5260;5261;5262;5263;5264;5265;5266;5267;5268;5269;5270;5271;5272;5273;5274;5275;5276;5277;5278;5279;5280;5281;5282;6057;6058;6059;6060;6061;6062;6096;6097;6098;6099…	2274;2275;2276;2277;2278;2279;2280;2281;2282;2283;2339;2340;3307;3308;3309;3310;3311;3312;3313;3314;3315;3316;3317;3318;3319;3320;3321;3322;3323;3324;3325;3326;3327;3328;3329;3330;3331;3332;3333;3334;3335;3336;3337;3338;3339;3340;3341;3342;3343;4656;4657;4658;4659;4660;4661;4662;4663;4664;4665;4666;4667;4668;4669;4670;4671;4672;4673;4674;4675;4676;4677;4678;4679;4680;4681;4682;4683;4684;4685;4686…
Q9CPR5	Q9CPR5	7	7	7	39S ribosomal protein L15, mitochondrial	Mrpl15	sp|Q9CPR5|RM15_MOUSE 39S ribosomal protein L15, mitochondrial OS=Mus musculus OX=10090 GN=Mrpl15 PE=1 SV=1	1	7	7	7	7	7	7	7	7	7	29.2	29.2	29.2	33.541	295	295	0	50.381	By MS/MS	By MS/MS	29.2	29.2	222940000	99441000	123500000	12386000	5524500	6861100	90650000	91296000	2	3	5				558	756;1719;1932;2466;2724;3002;3612	True;True;True;True;True;True;True	810;1832;2053;2624;2901;3224;3881	1999;2000;4519;4520;5139;5140;6707;6708;7404;7405;8287;8288;10026;10027	1731;1732;3980;4538;5965;5966;6633;7392;8883
Q9CPT4;Q969H8	Q9CPT4;Q969H8	2;1	2;1	2;1	Myeloid-derived growth factor	Mydgf;MYDGF	sp|Q9CPT4|MYDGF_MOUSE Myeloid-derived growth factor OS=Mus musculus OX=10090 GN=Mydgf PE=1 SV=1;sp|Q969H8|MYDGF_HUMAN Myeloid-derived growth factor OS=Homo sapiens OX=9606 GN=MYDGF PE=1 SV=1	2	2	2	2	0	2	0	2	0	2	14.5	14.5	14.5	17.982	166	166;173	0	12.495		By MS/MS	0	14.5	44321000	0	44321000	6331600	0	6331600	0	29609000	0	2	2				559	1014;3817	True;True	1083;4090	2663;10540	2318;9316
Q9CPT5	Q9CPT5	5	5	5	Nucleolar protein 16	Nop16	sp|Q9CPT5|NOP16_MOUSE Nucleolar protein 16 OS=Mus musculus OX=10090 GN=Nop16 PE=1 SV=1	1	5	5	5	5	5	5	5	5	5	24.2	24.2	24.2	21.139	178	178	0	59.238	By MS/MS	By MS/MS	24.2	24.2	610390000	339710000	270680000	61039000	33971000	27068000	339040000	181500000	4	6	10				560	638;1145;2233;2234;4710	True;True;True;True;True	682;1218;2376;2377;5033	1672;1673;2956;2957;6049;6050;6051;6052;6053;6054;6055;6056;12883;12884	1447;1448;2594;5379;5380;5381;5382;5383;5384;5385;11420
Q9CPU0	Q9CPU0	6	6	6	Lactoylglutathione lyase	Glo1	sp|Q9CPU0|LGUL_MOUSE Lactoylglutathione lyase OS=Mus musculus OX=10090 GN=Glo1 PE=1 SV=3	1	6	6	6	2	6	2	6	2	6	43.5	43.5	43.5	20.809	184	184	0	47.053	By MS/MS	By MS/MS	9.2	43.5	195220000	13028000	182190000	17747000	1184400	16563000	17550000	117190000	1	6	7				561	566;1234;1365;1448;3362;4353	True;True;True;True;True;True	607;1321;1457;1542;3609;4652	1474;3219;3549;3752;9274;9275;12010;12011	1280;2823;3104;3275;8238;10659;10660
Q9CPU4	Q9CPU4	3	3	3	Microsomal glutathione S-transferase 3	Mgst3	sp|Q9CPU4|MGST3_MOUSE Microsomal glutathione S-transferase 3 OS=Mus musculus OX=10090 GN=Mgst3 PE=1 SV=1	1	3	3	3	0	3	0	3	0	3	18.3	18.3	18.3	16.958	153	153	0	27.749		By MS/MS	0	18.3	541890000	0	541890000	77413000	0	77413000	0	362020000	0	4	4				562	1763;4396;4397	True;True;True	1879;4697;4698	4661;12121;12122;12123	4118;10752;10753;10754
Q9CPW4	Q9CPW4	2	2	2	Actin-related protein 2/3 complex subunit 5	Arpc5	sp|Q9CPW4|ARPC5_MOUSE Actin-related protein 2/3 complex subunit 5 OS=Mus musculus OX=10090 GN=Arpc5 PE=1 SV=3	1	2	2	2	2	2	2	2	2	2	20.5	20.5	20.5	16.288	151	151	0	14.081	By MS/MS	By MS/MS	20.5	20.5	210980000	146200000	64772000	21098000	14620000	6477200	146140000	43333000	1	2	3				563	237;1354	True;True	259;1445	661;662;3525;3526	584;585;3086
Q9CPX7	Q9CPX7	4	4	4	28S ribosomal protein S16, mitochondrial	Mrps16	sp|Q9CPX7|RT16_MOUSE 28S ribosomal protein S16, mitochondrial OS=Mus musculus OX=10090 GN=Mrps16 PE=1 SV=1	1	4	4	4	2	4	2	4	2	4	36.3	36.3	36.3	15.192	135	135	0	25.812	By MS/MS	By MS/MS	19.3	36.3	206800000	28115000	178680000	22978000	3123900	19854000	0	119370000	1	5	6				564	468;1268;2334;2808	True;True;True;True	506;1357;2482;2989	1225;3316;3317;3318;6351;7697;7698	1061;2912;2913;5645;6878;6879
Q9CQ06	Q9CQ06	8	8	8	39S ribosomal protein L24, mitochondrial	Mrpl24	sp|Q9CQ06|RM24_MOUSE 39S ribosomal protein L24, mitochondrial OS=Mus musculus OX=10090 GN=Mrpl24 PE=1 SV=1	1	8	8	8	7	8	7	8	7	8	31.9	31.9	31.9	24.944	216	216	0	53.966	By MS/MS	By MS/MS	28.2	31.9	373260000	121900000	251370000	31105000	10158000	20947000	127340000	162490000	4	7	11				565	67;68;422;719;1885;2231;2810;3156	True;True;True;True;True;True;True;True	69;70;456;773;2004;2374;2991;3392	145;146;147;148;1108;1109;1902;1903;4984;4985;6047;7701;7702;8726;8727	128;129;959;1653;4397;4398;5377;6882;6883;7764;7765
Q9CQ40	Q9CQ40	2	2	2	39S ribosomal protein L49, mitochondrial	Mrpl49	sp|Q9CQ40|RM49_MOUSE 39S ribosomal protein L49, mitochondrial OS=Mus musculus OX=10090 GN=Mrpl49 PE=1 SV=1	1	2	2	2	2	2	2	2	2	2	15.1	15.1	15.1	19.133	166	166	0	35.45	By MS/MS	By MS/MS	15.1	15.1	172480000	43097000	129380000	15680000	3917900	11762000	0	86434000	1	1	2				566	686;4027	True;True	739;4309	1832;1833;11124;11125	1596;9854;9855
Q9CQ60	Q9CQ60	2	2	2	6-phosphogluconolactonase	Pgls	sp|Q9CQ60|6PGL_MOUSE 6-phosphogluconolactonase OS=Mus musculus OX=10090 GN=Pgls PE=1 SV=1	1	2	2	2	0	2	0	2	0	2	13.2	13.2	13.2	27.254	257	257	0	14.501		By MS/MS	0	13.2	15837000	0	15837000	1319800	0	1319800	0	10580000	0	3	3				567	2629;2681	True;True	2797;2858	7161;7320	6428;6562;6563
Q9CQA6	Q9CQA6	2	2	2	Coiled-coil-helix-coiled-coil-helix domain-containing protein 1	Chchd1	sp|Q9CQA6|CHCH1_MOUSE Coiled-coil-helix-coiled-coil-helix domain-containing protein 1 OS=Mus musculus OX=10090 GN=Chchd1 PE=1 SV=1	1	2	2	2	2	2	2	2	2	2	22.9	22.9	22.9	13.608	118	118	0	26.505	By matching	By MS/MS	22.9	22.9	63208000	15465000	47744000	12642000	3092900	9548700	15294000	32067000	0	2	2				568	893;3569	True;True	956;3837	2352;2353;9879;9880	2048;8753
Q9CQB5;Q8N5K1	Q9CQB5;Q8N5K1	2;1	2;1	2;1	CDGSH iron-sulfur domain-containing protein 2	Cisd2;CISD2	sp|Q9CQB5|CISD2_MOUSE CDGSH iron-sulfur domain-containing protein 2 OS=Mus musculus OX=10090 GN=Cisd2 PE=1 SV=1;sp|Q8N5K1|CISD2_HUMAN CDGSH iron-sulfur domain-containing protein 2 OS=Homo sapiens OX=9606 GN=CISD2 PE=1 SV=1	2	2	2	2	1	2	1	2	1	2	20	20	20	15.242	135	135;135	0	14.44	By matching	By MS/MS	10.4	20	34367000	2960900	31406000	3818500	328990	3489500	0	20981000	0	2	2				569	3283;4533	True;True	3524;4844	9046;12453;12454	8052;11042
Q9CQE3	Q9CQE3	4	4	4	28S ribosomal protein S17, mitochondrial	Mrps17	sp|Q9CQE3|RT17_MOUSE 28S ribosomal protein S17, mitochondrial OS=Mus musculus OX=10090 GN=Mrps17 PE=1 SV=1	1	4	4	4	3	4	3	4	3	4	51.7	51.7	51.7	13.382	120	120	0	38.052	By MS/MS	By MS/MS	35	51.7	311500000	94158000	217340000	51917000	15693000	36224000	83263000	156090000	2	3	5				570	1636;2825;4116;4276	True;True;True;True	1738;3006;4406;4571	4214;4215;7739;7740;11382;11814;11815	3680;3681;6918;10090;10476;10477
Q9CQE8	Q9CQE8	4	4	4	UPF0568 protein C14orf166 homolog		sp|Q9CQE8|RTRAF_MOUSE RNA transcription, translation and transport factor protein OS=Mus musculus OX=10090 GN=RTRAF PE=1 SV=1	1	4	4	4	3	4	3	4	3	4	24.6	24.6	24.6	28.152	244	244	0	29.01	By MS/MS	By MS/MS	16.4	24.6	63957000	17920000	46036000	3997300	1120000	2877300	0	30755000	1	1	2				571	177;1666;2957;2999	True;True;True;True	191;1770;3176;3221	466;467;4314;8158;8159;8282;8283	406;3785;7272;7273;7388
Q9CQF0	Q9CQF0	7	7	7	39S ribosomal protein L11, mitochondrial	Mrpl11	sp|Q9CQF0|RM11_MOUSE 39S ribosomal protein L11, mitochondrial OS=Mus musculus OX=10090 GN=Mrpl11 PE=1 SV=1	1	7	7	7	6	7	6	7	6	7	46.4	46.4	46.4	20.68	192	192	0	53.208	By MS/MS	By MS/MS	41.7	46.4	447740000	109870000	337870000	34441000	8451500	25990000	121420000	214160000	1	7	8				572	173;222;653;774;1043;1738;1847	True;True;True;True;True;True;True	187;242;697;829;1112;1851;1964	458;459;460;461;614;615;1716;1717;2052;2053;2721;4567;4568;4873;4874	401;402;546;1485;1781;2363;4021;4302
Q9CQF3	Q9CQF3	2	2	2	Cleavage and polyadenylation specificity factor subunit 5	Nudt21	sp|Q9CQF3|CPSF5_MOUSE Cleavage and polyadenylation specificity factor subunit 5 OS=Mus musculus OX=10090 GN=Nudt21 PE=1 SV=1	1	2	2	2	1	2	1	2	1	2	10.6	10.6	10.6	26.24	227	227	0	13.656	By matching	By MS/MS	6.6	10.6	28059000	7195900	20863000	2004200	513990	1490200	0	13938000	0	2	2				573	2440;3938	True;True	2597;4217	6637;10884;10885	5898;9634
Q9CQJ8	Q9CQJ8	2	2	2	NADH dehydrogenase [ubiquinone] 1 beta subcomplex subunit 9	Ndufb9	sp|Q9CQJ8|NDUB9_MOUSE NADH dehydrogenase [ubiquinone] 1 beta subcomplex subunit 9 OS=Mus musculus OX=10090 GN=Ndufb9 PE=1 SV=3	1	2	2	2	0	2	0	2	0	2	24.6	24.6	24.6	21.984	179	179	0	38.401		By MS/MS	0	24.6	26630000	0	26630000	3328700	0	3328700	0	17790000	0	1	1				574	776;851	True;True	831;912	2056;2238	1784;1949
Q9CQL4	Q9CQL4	2	2	2	39S ribosomal protein L20, mitochondrial	Mrpl20	sp|Q9CQL4|RM20_MOUSE 39S ribosomal protein L20, mitochondrial OS=Mus musculus OX=10090 GN=Mrpl20 PE=1 SV=1	1	2	2	2	2	2	2	2	2	2	14.1	14.1	14.1	17.595	149	149	0	15.712	By MS/MS	By MS/MS	14.1	14.1	120690000	22733000	97955000	15086000	2841700	12244000	24128000	64045000	1	3	4				575	2018;4716	True;True	2147;5039	5400;5401;5402;5403;12894;12895	4788;4789;11429;11430
Q9CQL5	Q9CQL5	2	2	2	39S ribosomal protein L18, mitochondrial	Mrpl18	sp|Q9CQL5|RM18_MOUSE 39S ribosomal protein L18, mitochondrial OS=Mus musculus OX=10090 GN=Mrpl18 PE=1 SV=1	1	2	2	2	1	2	1	2	1	2	10.6	10.6	10.6	20.677	180	180	0	12.487	By MS/MS	By MS/MS	5	10.6	105080000	21971000	83108000	13135000	2746400	10389000	0	55521000	1	2	3				576	3049;3155	True;True	3274;3391	8451;8452;8725	7538;7539;7763
Q9CQM5	Q9CQM5	2	2	2	Thioredoxin domain-containing protein 17	Txndc17	sp|Q9CQM5|TXD17_MOUSE Thioredoxin domain-containing protein 17 OS=Mus musculus OX=10090 GN=Txndc17 PE=1 SV=1	1	2	2	2	2	2	2	2	2	2	18.7	18.7	18.7	14.015	123	123	0	13.42	By MS/MS	By MS/MS	18.7	18.7	80342000	14922000	65420000	11477000	2131700	9345700	15086000	43540000	1	2	3				577	2021;3805	True;True	2150;4077	5409;5410;10512;10513	4796;9294;9295
Q9CQN7	Q9CQN7	4	4	4	39S ribosomal protein L41, mitochondrial	Mrpl41	sp|Q9CQN7|RM41_MOUSE 39S ribosomal protein L41, mitochondrial OS=Mus musculus OX=10090 GN=Mrpl41 PE=1 SV=1	1	4	4	4	4	4	4	4	4	4	31.1	31.1	31.1	15.261	135	135	0	26.83	By MS/MS	By MS/MS	31.1	31.1	262480000	77901000	184580000	32810000	9737600	23073000	80704000	120510000	3	4	7				578	261;321;2448;4651	True;True;True;True	284;349;2606;4968	725;726;875;876;6660;6661;12737;12738	635;636;751;752;5923;11290;11291
Q9CQQ7	Q9CQQ7	4	4	4	ATP synthase F(0) complex subunit B1, mitochondrial	Atp5f1	sp|Q9CQQ7|AT5F1_MOUSE ATP synthase F(0) complex subunit B1, mitochondrial OS=Mus musculus OX=10090 GN=Atp5f1 PE=1 SV=1	1	4	4	4	2	4	2	4	2	4	17.2	17.2	17.2	28.948	256	256	0	29.586	By matching	By MS/MS	8.2	17.2	162160000	31791000	130370000	9538600	1870100	7668500	50515000	68367000	0	4	4				579	1745;1761;2474;3575	True;True;True;True	1860;1877;2633;3843	4598;4599;4658;6722;9892;9893	4045;4116;5978;8762
Q9CQR2	Q9CQR2	6	6	6	40S ribosomal protein S21	Rps21	sp|Q9CQR2|RS21_MOUSE 40S ribosomal protein S21 OS=Mus musculus OX=10090 GN=Rps21 PE=1 SV=1	1	6	6	6	6	4	6	4	6	4	63.9	63.9	63.9	9.1413	83	83	0	121.04	By MS/MS	By MS/MS	63.9	57.8	3281100000	1494600000	1786400000	656210000	298930000	357290000	1236700000	1014200000	10	8	18				580	588;589;2897;2934;2935;4118	True;True;True;True;True;True	631;632;633;3087;3088;3143;3144;3145;3146;4408	1537;1538;1539;1540;1541;1542;1543;7942;7943;7944;7945;8083;8084;8085;8086;8087;8088;8089;11387;11388	1334;1335;1336;1337;1338;1339;7090;7091;7092;7211;7212;7213;7214;7215;7216;7217;10094;10095
Q9CQV5	Q9CQV5	2	2	2	28S ribosomal protein S24, mitochondrial	Mrps24	sp|Q9CQV5|RT24_MOUSE 28S ribosomal protein S24, mitochondrial OS=Mus musculus OX=10090 GN=Mrps24 PE=1 SV=1	1	2	2	2	2	2	2	2	2	2	5.4	5.4	5.4	18.901	167	167	0	11.602	By matching	By MS/MS	5.4	5.4	56113000	16615000	39497000	5611300	1661500	3949700	18237000	24765000	0	2	2				581	3964;3965	True;True	4244;4245	10944;10945;10946;10947	9689;9690
Q9CR57	Q9CR57	11	11	11	60S ribosomal protein L14	Rpl14	sp|Q9CR57|RL14_MOUSE 60S ribosomal protein L14 OS=Mus musculus OX=10090 GN=Rpl14 PE=1 SV=3	1	11	11	11	11	8	11	8	11	8	42.4	42.4	42.4	23.564	217	217	0	114.19	By MS/MS	By MS/MS	42.4	34.1	45324000000	24816000000	20508000000	9064800000	4963200000	4101600000	23141000000	13765000000	38	27	65				582	23;230;296;465;497;498;2807;2945;3427;3454;4163	True;True;True;True;True;True;True;True;True;True;True	23;251;322;502;535;536;537;538;2988;3159;3160;3679;3706;4454	42;43;635;636;803;804;805;806;807;808;1218;1291;1292;1293;1294;1295;1296;1297;1298;1299;1300;1301;1302;1303;1304;1305;1306;7648;7649;7650;7651;7652;7653;7654;7655;7656;7657;7658;7659;7660;7661;7662;7663;7664;7665;7666;7667;7668;7669;7670;7671;7672;7673;7674;7675;7676;7677;7678;7679;7680;7681;7682;7683;7684;7685;7686;7687;7688;7689;7690;7691;7692;7693;7694;7695;7696;8119;8120;8121;8122;8123;8124;9…	37;561;562;691;692;693;694;695;696;1055;1119;1120;1121;1122;1123;1124;1125;1126;1127;1128;1129;1130;1131;1132;1133;1134;6834;6835;6836;6837;6838;6839;6840;6841;6842;6843;6844;6845;6846;6847;6848;6849;6850;6851;6852;6853;6854;6855;6856;6857;6858;6859;6860;6861;6862;6863;6864;6865;6866;6867;6868;6869;6870;6871;6872;6873;6874;6875;6876;6877;7241;7242;7243;7244;7245;8408;8409;8483;10200;10201;10202;1…
Q9CR59	Q9CR59	3	3	3	Growth arrest and DNA damage-inducible proteins-interacting protein 1	Gadd45gip1	sp|Q9CR59|G45IP_MOUSE Growth arrest and DNA damage-inducible proteins-interacting protein 1 OS=Mus musculus OX=10090 GN=Gadd45gip1 PE=1 SV=1	1	3	3	3	3	3	3	3	3	3	16.2	16.2	16.2	25.82	222	222	0	21.131	By MS/MS	By MS/MS	16.2	16.2	135010000	28801000	106210000	11251000	2400100	8850400	28090000	71662000	1	3	4				583	1221;2717;3431	True;True;True	1308;2894;3683	3195;3196;7391;7392;9499;9500	2803;6622;6623;8419
Q9CR61	Q9CR61	2	2	2	NADH dehydrogenase [ubiquinone] 1 beta subcomplex subunit 7	Ndufb7	sp|Q9CR61|NDUB7_MOUSE NADH dehydrogenase [ubiquinone] 1 beta subcomplex subunit 7 OS=Mus musculus OX=10090 GN=Ndufb7 PE=1 SV=3	1	2	2	2	0	2	0	2	0	2	13.9	13.9	13.9	16.331	137	137	0	11.542		By MS/MS	0	13.9	33495000	0	33495000	4186900	0	4186900	0	22377000	0	1	1				584	696;753	True;True	749;807	1848;1993	1610;1727
Q9CRB2	Q9CRB2	5	5	5	H/ACA ribonucleoprotein complex subunit 2	Nhp2	sp|Q9CRB2|NHP2_MOUSE H/ACA ribonucleoprotein complex subunit 2 OS=Mus musculus OX=10090 GN=Nhp2 PE=1 SV=1	1	5	5	5	4	5	4	5	4	5	44.4	44.4	44.4	17.247	153	153	0	70.878	By MS/MS	By MS/MS	31.4	44.4	327530000	42118000	285410000	54588000	7019700	47568000	47449000	185340000	3	7	10				585	33;496;956;3426;4121	True;True;True;True;True	35;534;1020;3678;4411	72;73;1289;1290;2518;2519;2520;2521;9485;9486;11392;11393	60;1118;2193;2194;2195;2196;8406;8407;10099;10100
Q9CRB9	Q9CRB9	6	6	6	MICOS complex subunit Mic19	Chchd3	sp|Q9CRB9|MIC19_MOUSE MICOS complex subunit Mic19 OS=Mus musculus OX=10090 GN=Chchd3 PE=1 SV=1	1	6	6	6	3	6	3	6	3	6	33	33	33	26.334	227	227	0	47.692	By matching	By MS/MS	15.4	33	379690000	37997000	341690000	31641000	3166400	28474000	66629000	199640000	0	7	7				586	2237;2737;4130;4490;4642;4750	True;True;True;True;True;True	2380;2914;4420;4798;4957;5074	6063;7443;7444;11410;11411;11412;12357;12719;12720;12965;12966	5390;6667;10116;10117;10958;11273;11274;11491
Q9CVB6	Q9CVB6	2	2	2	Actin-related protein 2/3 complex subunit 2	Arpc2	sp|Q9CVB6|ARPC2_MOUSE Actin-related protein 2/3 complex subunit 2 OS=Mus musculus OX=10090 GN=Arpc2 PE=1 SV=3	1	2	2	2	2	1	2	1	2	1	5.3	5.3	5.3	34.357	300	300	0	10.856	By MS/MS	By matching	5.3	3	78120000	66237000	11883000	3906000	3311900	594150	66237000	0	2	0	2				587	2970;4227	True;True	3189;4521	8186;8187;11684	7294;10359
Q9CWJ9	Q9CWJ9	3	3	3	Bifunctional purine biosynthesis protein PURH;Phosphoribosylaminoimidazolecarboxamide formyltransferase;IMP cyclohydrolase	Atic	sp|Q9CWJ9|PUR9_MOUSE Bifunctional purine biosynthesis protein PURH OS=Mus musculus OX=10090 GN=Atic PE=1 SV=2	1	3	3	3	2	3	2	3	2	3	6.9	6.9	6.9	64.217	592	592	0	19.25	By MS/MS	By MS/MS	4.7	6.9	57284000	27009000	30274000	1636700	771690	864990	0	20225000	1	1	2				588	338;1062;4543	True;True;True	367;1131;4854	924;2755;2756;12474;12475	798;2394;2395;11056
Q9CWN7	Q9CWN7	2	2	2	CCR4-NOT transcription complex subunit 11	Cnot11	sp|Q9CWN7|CNO11_MOUSE CCR4-NOT transcription complex subunit 11 OS=Mus musculus OX=10090 GN=Cnot11 PE=1 SV=1	1	2	2	2	1	2	1	2	1	2	7.1	7.1	7.1	54.959	505	505	0	19.527	By matching	By MS/MS	4.8	7.1	20973000	5266600	15707000	806660	202560	604100	0	10493000	0	2	2				589	1128;3876	True;True	1198;4151	2907;10704;10705	2548;9465
Q9CWZ3	Q9CWZ3	4	4	4	RNA-binding protein 8A	Rbm8a	sp|Q9CWZ3|RBM8A_MOUSE RNA-binding protein 8A OS=Mus musculus OX=10090 GN=Rbm8a PE=1 SV=4	1	4	4	4	4	4	4	4	4	4	37.4	37.4	37.4	19.889	174	174	0	52.002	By MS/MS	By MS/MS	37.4	37.4	700070000	84669000	615400000	87509000	10584000	76925000	67965000	377500000	1	7	8				590	95;1628;2936;3012	True;True;True;True	100;101;1730;3147;3236	235;236;237;238;239;4197;4198;8090;8091;8092;8347;8348	201;202;203;3669;7218;7219;7449;7450
Q9CXW2	Q9CXW2	9	9	9	28S ribosomal protein S22, mitochondrial	Mrps22	sp|Q9CXW2|RT22_MOUSE 28S ribosomal protein S22, mitochondrial OS=Mus musculus OX=10090 GN=Mrps22 PE=1 SV=1	1	9	9	9	8	8	8	8	8	8	37	37	37	41.192	359	359	0	74.608	By MS/MS	By MS/MS	29.5	34	419620000	154460000	265160000	17484000	6435800	11048000	155320000	176280000	4	6	10				591	660;996;1631;2025;2156;2224;4296;4376;4769	True;True;True;True;True;True;True;True;True	705;1064;1733;2154;2295;2367;4592;4676;5094	1734;1735;2607;4203;4204;5417;5418;5787;5788;6015;6016;11855;11856;12070;12071;13015;13016	1502;1503;2267;3672;4801;5150;5345;10508;10509;10712;11538;11539
Q9CXW3	Q9CXW3	2	2	2	Calcyclin-binding protein	Cacybp	sp|Q9CXW3|CYBP_MOUSE Calcyclin-binding protein OS=Mus musculus OX=10090 GN=Cacybp PE=1 SV=1	1	2	2	2	1	2	1	2	1	2	6.6	6.6	6.6	26.51	229	229	0	13.085	By MS/MS	By MS/MS	3.9	6.6	7083200	0	7083200	544870	0	544870	0	4732000	1	2	3				592	396;397	True;True	430;431	1060;1061;1062	918;919;920
Q9CXW4	Q9CXW4	18	18	18	60S ribosomal protein L11	Rpl11	sp|Q9CXW4|RL11_MOUSE 60S ribosomal protein L11 OS=Mus musculus OX=10090 GN=Rpl11 PE=1 SV=4	1	18	18	18	17	15	17	15	17	15	68.5	68.5	68.5	20.252	178	178	0	179.45	By MS/MS	By MS/MS	56.2	63.5	83357000000	40151000000	43207000000	8335700000	4015100000	4320700000	39224000000	27905000000	31	22	53				593	25;103;347;348;1308;1767;2184;2368;2369;3085;3171;3172;4348;4349;4457;4458;4577;4627	True;True;True;True;True;True;True;True;True;True;True;True;True;True;True;True;True;True	25;111;376;377;378;379;1399;1883;2324;2520;2521;3312;3407;3408;4647;4648;4762;4763;4889;4942	48;273;274;940;941;942;943;944;945;946;947;3415;3416;3417;3418;4666;4667;4668;5879;5880;5881;5882;6467;6468;6469;8535;8764;8765;8766;8767;11995;11996;11997;11998;11999;12000;12001;12002;12003;12004;12279;12280;12281;12282;12283;12284;12563;12564;12565;12566;12567;12568;12685;12686;12687;12688;12689;12690	42;234;235;811;812;813;814;815;816;817;818;819;2996;2997;4122;4123;5231;5232;5233;5745;5746;5747;7609;7800;7801;7802;7803;10642;10643;10644;10645;10646;10647;10648;10649;10650;10651;10652;10653;10654;10896;10897;10898;10899;10900;11142;11143;11144;11145;11146;11147;11245;11246;11247;11248;11249
Q9CXY6	Q9CXY6	8	8	8	Interleukin enhancer-binding factor 2	Ilf2	sp|Q9CXY6|ILF2_MOUSE Interleukin enhancer-binding factor 2 OS=Mus musculus OX=10090 GN=Ilf2 PE=1 SV=1	1	8	8	8	5	8	5	8	5	8	35.4	35.4	35.4	43.062	390	390	0	58.693	By MS/MS	By MS/MS	18.2	35.4	232740000	105280000	127460000	12249000	5540900	6708400	105590000	84839000	6	6	12				594	346;1929;1943;3108;3297;4319;4382;4575	True;True;True;True;True;True;True;True	375;2050;2065;3340;3539;4617;4682;4887	939;5134;5162;5163;8606;8607;8608;8609;9084;9085;11927;11928;12081;12082;12560	810;4533;4556;4557;7668;7669;7670;8083;8084;10577;10720;10721;11140
Q9CY16	Q9CY16	2	2	2	28S ribosomal protein S28, mitochondrial	Mrps28	sp|Q9CY16|RT28_MOUSE 28S ribosomal protein S28, mitochondrial OS=Mus musculus OX=10090 GN=Mrps28 PE=1 SV=1	1	2	2	2	2	2	2	2	2	2	10.2	10.2	10.2	20.52	186	186	0	13.094	By MS/MS	By MS/MS	10.2	10.2	123720000	38768000	84956000	13747000	4307500	9439600	38405000	57118000	1	2	3				595	2575;3526	True;True	2739;3790	7006;7007;9783;9784	6246;8673;8674
Q9CY27	Q9CY27	2	2	2	Very-long-chain enoyl-CoA reductase	Tecr	sp|Q9CY27|TECR_MOUSE Very-long-chain enoyl-CoA reductase OS=Mus musculus OX=10090 GN=Tecr PE=1 SV=1	1	2	2	2	1	2	1	2	1	2	8.8	8.8	8.8	36.09	308	308	0	12.321	By MS/MS	By MS/MS	2.6	8.8	37661000	3056200	34604000	2897000	235090	2661900	0	23118000	1	2	3				596	905;2930	True;True	968;3138;3139	2382;8075;8076;8077	2071;7205;7206;7207
Q9CY57	Q9CY57	3	3	3	Chromatin target of PRMT1 protein	Chtop	sp|Q9CY57|CHTOP_MOUSE Chromatin target of PRMT1 protein OS=Mus musculus OX=10090 GN=Chtop PE=1 SV=2	1	3	3	3	0	3	0	3	0	3	16.9	16.9	16.9	26.585	249	249	0	22.881		By MS/MS	0	16.9	112870000	0	112870000	12541000	0	12541000	0	75401000	0	4	4				597	385;1004;2343	True;True;True	419;1072;2493	1039;2627;6382;6383	903;2284;5667;5668
Q9CY58	Q9CY58	27	27	27	Plasminogen activator inhibitor 1 RNA-binding protein	Serbp1	sp|Q9CY58|PAIRB_MOUSE Plasminogen activator inhibitor 1 RNA-binding protein OS=Mus musculus OX=10090 GN=Serbp1 PE=1 SV=2	1	27	27	27	26	26	26	26	26	26	52.6	52.6	52.6	44.714	407	407	0	323.31	By MS/MS	By MS/MS	52.6	51.6	18863000000	6868500000	11994000000	1047900000	381580000	666350000	6414300000	8074300000	40	49	89				598	233;836;837;976;1103;1341;1342;1399;2110;2139;2217;2218;2221;3101;3102;3173;3363;3371;3421;3497;3597;3727;3734;3735;3736;3853;4253	True;True;True;True;True;True;True;True;True;True;True;True;True;True;True;True;True;True;True;True;True;True;True;True;True;True;True	255;897;898;1041;1172;1432;1433;1492;2246;2276;2360;2361;2364;3331;3332;3409;3610;3618;3672;3755;3756;3865;3866;3999;4006;4007;4008;4128;4547	649;650;2212;2213;2214;2215;2216;2217;2568;2569;2844;2845;2846;2847;2848;2849;2850;2851;3501;3502;3503;3504;3505;3506;3633;3634;3635;3636;5657;5658;5659;5660;5740;5741;5992;5993;5994;5995;5996;5997;5998;5999;6006;6007;6008;6009;8584;8585;8586;8768;8769;8770;8771;9276;9277;9278;9279;9308;9309;9469;9694;9695;9696;9697;9698;9699;9700;9701;9968;9969;9970;9971;9972;9973;9974;9975;9976;9977;9978;9979;9…	574;575;1926;1927;1928;1929;1930;2233;2234;2480;2481;2482;2483;2484;2485;2486;2487;2488;3064;3065;3066;3067;3068;3175;3176;3177;3178;5028;5029;5030;5031;5104;5105;5325;5326;5327;5328;5329;5330;5331;5337;5338;5339;5340;7650;7651;7652;7804;7805;7806;7807;8239;8240;8241;8265;8392;8598;8599;8600;8601;8602;8825;8826;8827;8828;8829;8830;8831;8832;8833;8834;8835;9127;9128;9142;9143;9144;9145;9146;9147;9…
Q9CY73	Q9CY73	6	6	6	39S ribosomal protein L44, mitochondrial	Mrpl44	sp|Q9CY73|RM44_MOUSE 39S ribosomal protein L44, mitochondrial OS=Mus musculus OX=10090 GN=Mrpl44 PE=1 SV=3	1	6	6	6	2	6	2	6	2	6	30	30	30	37.527	333	333	0	40.305	By MS/MS	By MS/MS	11.4	30	74071000	15188000	58884000	3898500	799340	3099100	26337000	28188000	3	7	10				599	564;770;2503;2697;3311;3319	True;True;True;True;True;True	605;825;2664;2874;3554;3562	1472;2046;6792;6793;7346;9120;9121;9122;9123;9140	1278;1776;6034;6035;6586;8110;8111;8112;8113;8130
Q9CYH6	Q9CYH6	5	5	5	Ribosome biogenesis regulatory protein homolog	Rrs1	sp|Q9CYH6|RRS1_MOUSE Ribosome biogenesis regulatory protein homolog OS=Mus musculus OX=10090 GN=Rrs1 PE=1 SV=1	1	5	5	5	2	5	2	5	2	5	14	14	14	41.551	365	365	0	37.833	By MS/MS	By MS/MS	6.3	14	149280000	9282000	140000000	8293400	515670	7777700	18189000	84620000	1	4	5				600	679;2128;2676;3200;4196	True;True;True;True;True	731;2264;2853;3437;4489	1799;1800;5711;7312;8827;8828;11602	1562;1563;5074;6555;7857;10286
Q9CYX7	Q9CYX7	2	2	2	RRP15-like protein	Rrp15	sp|Q9CYX7|RRP15_MOUSE RRP15-like protein OS=Mus musculus OX=10090 GN=Rrp15 PE=1 SV=2	1	2	2	2	2	2	2	2	2	2	6.4	6.4	6.4	31.058	281	281	0	13.607	By MS/MS	By MS/MS	6.4	6.4	126050000	47586000	78465000	10504000	3965500	6538700	48044000	51961000	1	2	3				601	559;1606	True;True	600;1707	1461;1462;4150;4151	1270;3631;3632
Q9CZ13	Q9CZ13	3	3	3	Cytochrome b-c1 complex subunit 1, mitochondrial	Uqcrc1	sp|Q9CZ13|QCR1_MOUSE Cytochrome b-c1 complex subunit 1, mitochondrial OS=Mus musculus OX=10090 GN=Uqcrc1 PE=1 SV=2	1	3	3	3	1	3	1	3	1	3	8.1	8.1	8.1	52.851	480	480	0	24.098	By MS/MS	By MS/MS	1.9	8.1	71193000	11926000	59267000	3390200	567920	2822200	0	39594000	1	2	3				602	1987;2948;3856	True;True;True	2115;3165;4131	5329;8134;10659;10660	4730;7254;9422
Q9CZM2	Q9CZM2	15	15	15	60S ribosomal protein L15	Rpl15	sp|Q9CZM2|RL15_MOUSE 60S ribosomal protein L15 OS=Mus musculus OX=10090 GN=Rpl15 PE=1 SV=4	1	15	15	15	12	13	12	13	12	13	47.5	47.5	47.5	24.146	204	204	0	151.85	By MS/MS	By MS/MS	43.6	46.1	72529000000	36486000000	36044000000	6593600000	3316900000	3276700000	37579000000	22777000000	26	30	56				603	231;1125;1312;3098;3099;3132;3192;3241;3285;3415;3418;3647;4370;4679;4680	True;True;True;True;True;True;True;True;True;True;True;True;True;True;True	252;1195;1403;3328;3329;3366;3429;3482;3526;3666;3669;3916;4670;4996;4997	637;638;2898;2899;2900;2901;2902;3427;3428;3429;3430;3431;3432;8577;8578;8579;8580;8581;8582;8662;8811;8941;8942;9049;9050;9449;9450;9451;9452;9453;9454;9460;10098;10099;12051;12052;12053;12054;12055;12056;12789;12790;12791;12792;12793;12794;12795	563;564;2531;2532;2533;2534;2535;2536;2537;2538;2539;2540;2541;2542;2543;3002;3003;3004;3005;3006;3007;7645;7646;7647;7648;7715;7844;7958;7959;8054;8374;8375;8376;8377;8378;8379;8385;8948;8949;10692;10693;10694;10695;10696;10697;10698;10699;11332;11333;11334;11335;11336;11337;11338;11339;11340;11341
Q9CZN7	Q9CZN7	3	3	3	Serine hydroxymethyltransferase	Shmt2	sp|Q9CZN7|GLYM_MOUSE Serine hydroxymethyltransferase, mitochondrial OS=Mus musculus OX=10090 GN=Shmt2 PE=1 SV=1	1	3	3	3	2	3	2	3	2	3	7.7	7.7	7.7	55.758	504	504	0	16.488	By MS/MS	By MS/MS	3.6	7.7	43773000	17365000	26408000	1509400	598790	910600	0	17642000	1	0	1				604	1626;3536;4613	True;True;True	1728;3800;4927	4194;9803;9804;12644;12645	3667;8688;11209
Q9CZU6	Q9CZU6	2	2	2	Citrate synthase, mitochondrial	Cs	sp|Q9CZU6|CISY_MOUSE Citrate synthase, mitochondrial OS=Mus musculus OX=10090 GN=Cs PE=1 SV=1	1	2	2	2	2	2	2	2	2	2	5.8	5.8	5.8	51.736	464	464	0	17.559	By MS/MS	By MS/MS	5.8	5.8	116920000	34049000	82873000	5846100	1702400	4143700	34105000	55307000	2	2	4				605	1495;2051	True;True	1589;2183	3883;3884;5503;5504	3406;3407;4882;4883
Q9CZX8	Q9CZX8	11	11	11	40S ribosomal protein S19	Rps19	sp|Q9CZX8|RS19_MOUSE 40S ribosomal protein S19 OS=Mus musculus OX=10090 GN=Rps19 PE=1 SV=3	1	11	11	11	11	10	11	10	11	10	57.2	57.2	57.2	16.085	145	145	0	158.23	By MS/MS	By MS/MS	57.2	47.6	70973000000	33637000000	37336000000	7885800000	3737400000	4148400000	31849000000	26603000000	23	24	47				606	236;632;739;914;1671;2557;3005;3176;3449;4379;4428	True;True;True;True;True;True;True;True;True;True;True	258;676;793;977;1777;2720;3228;3412;3701;4679;4733	657;658;659;660;1659;1955;1956;1957;1958;1959;1960;2405;2406;2407;2408;4336;4337;4338;4339;4340;4341;4342;4343;6940;6941;6942;6943;6944;6945;6946;8299;8300;8301;8774;8775;8776;8777;9551;9552;9553;9554;12076;12077;12214;12215	582;583;1436;1698;1699;1700;1701;1702;2092;2093;2094;2095;2096;2097;3806;3807;3808;3809;3810;3811;3812;3813;3814;3815;6181;6182;6183;6184;6185;6186;6187;7400;7401;7402;7810;7811;8465;8466;8467;8468;8469;8470;8471;8472;8473;10716;10717;10837;10838
Q9D0B6	Q9D0B6	4	4	4	Protein PBDC1	Pbdc1	sp|Q9D0B6|PBDC1_MOUSE Protein PBDC1 OS=Mus musculus OX=10090 GN=Pbdc1 PE=1 SV=1	1	4	4	4	4	3	4	3	4	3	25.3	25.3	25.3	22.223	198	198	0	29.499	By MS/MS	By MS/MS	25.3	19.7	84067000	52224000	31844000	7642500	4747600	2894900	36103000	37394000	3	2	5				607	882;1114;2376;2529	True;True;True;True	945;1184;2529;2691	2312;2313;2879;2880;6488;6489;6858	2012;2516;2517;5765;6107
Q9D0E1	Q9D0E1	15	15	15	Heterogeneous nuclear ribonucleoprotein M	Hnrnpm	sp|Q9D0E1|HNRPM_MOUSE Heterogeneous nuclear ribonucleoprotein M OS=Mus musculus OX=10090 GN=Hnrnpm PE=1 SV=3	1	15	15	15	11	15	11	15	11	15	30.6	30.6	30.6	77.648	729	729	0	210.94	By MS/MS	By MS/MS	21.7	30.6	2369500000	569700000	1799800000	50414000	12121000	38293000	595190000	1167800000	8	18	26				608	20;127;617;1122;1393;1422;1504;1835;1961;2898;2899;2900;3059;3236;4243	True;True;True;True;True;True;True;True;True;True;True;True;True;True;True	20;137;661;1192;1486;1516;1602;1952;2086;3089;3090;3091;3092;3284;3477;4537	35;36;339;340;1614;1615;1616;2893;2894;3618;3619;3620;3621;3695;3909;3910;3911;3912;4841;5241;5242;7946;7947;7948;7949;7950;7951;7952;7953;7954;8478;8930;8931;11722	32;33;296;1403;1404;1405;2527;3160;3161;3162;3163;3228;3424;3425;3426;4274;4643;4644;7093;7094;7095;7096;7097;7561;7949;7950;10393
Q9D0G0	Q9D0G0	6	6	6	28S ribosomal protein S30, mitochondrial	Mrps30	sp|Q9D0G0|RT30_MOUSE 28S ribosomal protein S30, mitochondrial OS=Mus musculus OX=10090 GN=Mrps30 PE=1 SV=1	1	6	6	6	3	6	3	6	3	6	25.3	25.3	25.3	49.939	442	442	0	38.753	By MS/MS	By MS/MS	11.5	25.3	73125000	20628000	52497000	3179300	896850	2282500	33069000	22630000	2	3	5				609	41;812;3821;4001;4090;4721	True;True;True;True;True;True	43;870;4094;4282;4376;5045	89;90;2154;2155;10549;10550;11053;11309;12905	76;1875;9324;9794;10025;11442
Q9D0K2	Q9D0K2	2	2	2	Succinyl-CoA:3-ketoacid coenzyme A transferase 1, mitochondrial	Oxct1	sp|Q9D0K2|SCOT1_MOUSE Succinyl-CoA:3-ketoacid coenzyme A transferase 1, mitochondrial OS=Mus musculus OX=10090 GN=Oxct1 PE=1 SV=1	1	2	2	2	1	2	1	2	1	2	9.2	9.2	9.2	55.988	520	520	0	18.174	By matching	By MS/MS	5.2	9.2	27719000	3813800	23905000	1205200	165820	1039400	0	15970000	0	2	2				610	157;656	True;True	168;700	411;412;1722	357;1489
Q9D0M3	Q9D0M3	5	5	5	Cytochrome c1, heme protein, mitochondrial	Cyc1	sp|Q9D0M3|CY1_MOUSE Cytochrome c1, heme protein, mitochondrial OS=Mus musculus OX=10090 GN=Cyc1 PE=1 SV=1	1	5	5	5	2	5	2	5	2	5	18.5	18.5	18.5	35.327	325	325	0	44.705	By matching	By MS/MS	8.9	18.5	145940000	26660000	119280000	10424000	1904300	8520200	0	79688000	0	5	5				611	720;1478;1479;1650;2735	True;True;True;True;True	774;1572;1573;1753;2912	1904;3846;3847;3848;4255;7439;7440;7441	1654;3374;3375;3725;6664;6665
Q9D0R2;P26639	Q9D0R2;P26639	3;2	3;2	3;2	Threonine--tRNA ligase, cytoplasmic	Tars;TARS	sp|Q9D0R2|SYTC_MOUSE Threonine--tRNA ligase, cytoplasmic OS=Mus musculus OX=10090 GN=Tars PE=1 SV=2;sp|P26639|SYTC_HUMAN Threonine--tRNA ligase, cytoplasmic OS=Homo sapiens OX=9606 GN=TARS PE=1 SV=3	2	3	3	3	2	3	2	3	2	3	4.6	4.6	4.6	83.355	722	722;723	0	17.572	By MS/MS	By MS/MS	2.8	4.6	33677000	16392000	17285000	821390	399810	421580	17147000	10793000	1	2	3				612	1186;2988;4595	True;True;True	1266;3208;4907	3074;8243;8244;12596;12597	2699;7345;7346;11170
Q9D0T1	Q9D0T1	6	6	6	NHP2-like protein 1;NHP2-like protein 1, N-terminally processed	Nhp2l1	sp|Q9D0T1|NH2L1_MOUSE NHP2-like protein 1 OS=Mus musculus OX=10090 GN=Snu13 PE=1 SV=4	1	6	6	6	5	6	5	6	5	6	40.6	40.6	40.6	14.173	128	128	0	58.093	By MS/MS	By MS/MS	28.1	40.6	347890000	58963000	288920000	43486000	7370400	36115000	93793000	158190000	1	7	8				613	56;473;474;2201;2576;3305	True;True;True;True;True;True	58;511;512;2341;2740;3547	120;121;1231;1232;1233;1234;5935;5936;7008;7009;9102;9103	103;104;1066;1067;5279;6247;6248;8099
Q9D125	Q9D125	4	4	4	28S ribosomal protein S25, mitochondrial	Mrps25	sp|Q9D125|RT25_MOUSE 28S ribosomal protein S25, mitochondrial OS=Mus musculus OX=10090 GN=Mrps25 PE=1 SV=1	1	4	4	4	1	4	1	4	1	4	31.6	31.6	31.6	19.92	171	171	0	43.247	By matching	By MS/MS	5.3	31.6	126350000	22976000	103380000	14039000	2552900	11486000	0	69062000	0	4	4				614	1149;1270;1287;1959	True;True;True;True	1222;1359;1376;2084	2964;2965;3321;3368;5239	2601;2915;2958;4641
Q9D1B9	Q9D1B9	4	4	4	39S ribosomal protein L28, mitochondrial	Mrpl28	sp|Q9D1B9|RM28_MOUSE 39S ribosomal protein L28, mitochondrial OS=Mus musculus OX=10090 GN=Mrpl28 PE=1 SV=3	1	4	4	4	4	4	4	4	4	4	17.5	17.5	17.5	30.169	257	257	0	39.127	By MS/MS	By MS/MS	17.5	17.5	240280000	111600000	128680000	20024000	9300100	10723000	110330000	87238000	3	4	7				615	973;2581;2696;4565	True;True;True;True	1037;2745;2873;4877	2561;2562;7018;7019;7020;7021;7344;7345;12540;12541	2227;6256;6257;6258;6584;6585;11124;11125
Q9D1D4	Q9D1D4	3	3	3	Transmembrane emp24 domain-containing protein 10	Tmed10	sp|Q9D1D4|TMEDA_MOUSE Transmembrane emp24 domain-containing protein 10 OS=Mus musculus OX=10090 GN=Tmed10 PE=1 SV=1	1	3	3	3	1	3	1	3	1	3	14.6	14.6	14.6	24.911	219	219	0	22.407	By matching	By MS/MS	4.1	14.6	67217000	4274400	62943000	6721700	427440	6294300	0	42049000	0	3	3				616	1972;2023;2551	True;True;True	2100;2152;2714	5291;5412;6918;6919	4693;4798;6161
Q9D1H8	Q9D1H8	2	2	2	39S ribosomal protein L53, mitochondrial	Mrpl53	sp|Q9D1H8|RM53_MOUSE 39S ribosomal protein L53, mitochondrial OS=Mus musculus OX=10090 GN=Mrpl53 PE=1 SV=1	1	2	2	2	1	2	1	2	1	2	23.7	23.7	23.7	12.737	118	118	0	13.115	By matching	By MS/MS	8.5	23.7	47649000	7771600	39878000	5956200	971450	4984700	0	26641000	0	2	2				617	1304;3885	True;True	1393;4161	3403;10740;10741	2986;9490
Q9D1I6	Q9D1I6	4	4	4	39S ribosomal protein L14, mitochondrial	Mrpl14	sp|Q9D1I6|RM14_MOUSE 39S ribosomal protein L14, mitochondrial OS=Mus musculus OX=10090 GN=Mrpl14 PE=1 SV=1	1	4	4	4	2	4	2	4	2	4	31	31	31	15.874	145	145	0	27.776	By matching	By MS/MS	11.7	31	114240000	14696000	99541000	12693000	1632900	11060000	20128000	61067000	0	4	4				618	266;1104;4238;4323	True;True;True;True	289;1173;4532;4621	733;734;2852;11714;11715;11934	643;2489;10387;10582
Q9D1N9	Q9D1N9	5	5	5	39S ribosomal protein L21, mitochondrial	Mrpl21	sp|Q9D1N9|RM21_MOUSE 39S ribosomal protein L21, mitochondrial OS=Mus musculus OX=10090 GN=Mrpl21 PE=1 SV=1	1	5	5	5	5	5	5	5	5	5	34.9	34.9	34.9	23.366	209	209	0	45.793	By MS/MS	By MS/MS	34.9	34.9	338910000	88087000	250820000	26070000	6775900	19294000	84645000	171010000	3	5	8				619	1901;4058;4195;4368;4487	True;True;True;True;True	2021;4340;4488;4667;4795	5050;5051;11189;11190;11191;11192;11600;11601;12047;12048;12352;12353	4470;9909;9910;9911;9912;10285;10688;10689;10955
Q9D1P0	Q9D1P0	6	6	6	39S ribosomal protein L13, mitochondrial	Mrpl13	sp|Q9D1P0|RM13_MOUSE 39S ribosomal protein L13, mitochondrial OS=Mus musculus OX=10090 GN=Mrpl13 PE=1 SV=1	1	6	6	6	5	6	5	6	5	6	48.9	48.9	48.9	20.677	178	178	0	62.979	By MS/MS	By MS/MS	34.8	48.9	361320000	73058000	288260000	27794000	5619900	22174000	79840000	185790000	2	7	9				620	2330;2495;2701;3068;3396;4563	True;True;True;True;True;True	2478;2656;2878;3293;3644;4875	6343;6344;6772;6773;7355;8493;8494;9386;9387;9388;9389;12531;12532;12533;12534	5641;6016;6017;6594;7573;7574;8326;8327;8328;11116;11117;11118
Q9D1R9	Q9D1R9	6	6	6	60S ribosomal protein L34	Rpl34	sp|Q9D1R9|RL34_MOUSE 60S ribosomal protein L34 OS=Mus musculus OX=10090 GN=Rpl34 PE=1 SV=2	1	6	6	6	6	5	6	5	6	5	17.9	17.9	17.9	13.293	117	117	0	39.014	By MS/MS	By MS/MS	17.9	17.9	39648000000	20056000000	19592000000	6608000000	3342600000	3265400000	27333000000	5811500000	8	7	15				621	132;133;2056;2057;3344;3345	True;True;True;True;True;True	142;143;2188;2189;3588;3589	356;357;358;359;360;361;5513;5514;5515;5516;9199;9200;9201	308;309;310;311;312;313;4892;4893;4894;4895;4896;4897;8178;8179;8180
Q9D2R8	Q9D2R8	2	2	2	28S ribosomal protein S33, mitochondrial	Mrps33	sp|Q9D2R8|RT33_MOUSE 28S ribosomal protein S33, mitochondrial OS=Mus musculus OX=10090 GN=Mrps33 PE=1 SV=1	1	2	2	2	0	2	0	2	0	2	17.9	17.9	17.9	12.459	106	106	0	12.359		By MS/MS	0	17.9	81288000	0	81288000	16258000	0	16258000	0	54305000	0	1	1				622	1817;4537	True;True	1934;4848	4807;12461	4250;11048
Q9D338	Q9D338	4	4	4	39S ribosomal protein L19, mitochondrial	Mrpl19	sp|Q9D338|RM19_MOUSE 39S ribosomal protein L19, mitochondrial OS=Mus musculus OX=10090 GN=Mrpl19 PE=1 SV=1	1	4	4	4	2	4	2	4	2	4	15.4	15.4	15.4	33.578	292	292	0	23.05	By MS/MS	By MS/MS	7.2	15.4	79261000	14369000	64892000	4403400	798270	3605100	20822000	36898000	1	4	5				623	1193;4059;4374;4502	True;True;True;True	1273;4341;4674;4812	3088;3089;11193;12065;12388;12389	2710;2711;9913;10707;10986
Q9D662;Q01405	Q9D662;Q01405	2;1	2;1	2;1	Protein transport protein Sec23B;Protein transport protein Sec23A	Sec23b;Sec23a	sp|Q9D662|SC23B_MOUSE Protein transport protein Sec23B OS=Mus musculus OX=10090 GN=Sec23b PE=1 SV=1;sp|Q01405|SC23A_MOUSE Protein transport protein Sec23A OS=Mus musculus OX=10090 GN=Sec23a PE=1 SV=2	2	2	2	2	1	2	1	2	1	2	3.5	3.5	3.5	86.436	767	767;765	0	11.565	By MS/MS	By MS/MS	1.7	3.5	2317000	406570	1910400	60973	10699	50273	0	1276300	1	2	3				624	427;1783	True;True	461;1899	1117;1118;4701	966;967;4150
Q9D6J5	Q9D6J5	2	2	2	NADH dehydrogenase [ubiquinone] 1 beta subcomplex subunit 8, mitochondrial	Ndufb8	sp|Q9D6J5|NDUB8_MOUSE NADH dehydrogenase [ubiquinone] 1 beta subcomplex subunit 8, mitochondrial OS=Mus musculus OX=10090 GN=Ndufb8 PE=1 SV=1	1	2	2	2	1	2	1	2	1	2	14.5	14.5	14.5	21.876	186	186	0	14.419	By matching	By MS/MS	8.6	14.5	70166000	3631100	66535000	7016600	363110	6653500	0	44449000	0	3	3				625	1380;3341	True;True	1472;3585	3580;3581;3582;9195	3131;3132;8175
Q9D6J6	Q9D6J6	3	3	3	NADH dehydrogenase [ubiquinone] flavoprotein 2, mitochondrial	Ndufv2	sp|Q9D6J6|NDUV2_MOUSE NADH dehydrogenase [ubiquinone] flavoprotein 2, mitochondrial OS=Mus musculus OX=10090 GN=Ndufv2 PE=1 SV=2	1	3	3	3	1	3	1	3	1	3	20.6	20.6	20.6	27.285	248	248	0	30.043	By MS/MS	By MS/MS	8.1	20.6	115810000	9971900	105840000	8272500	712280	7560200	0	70709000	1	3	4				626	694;717;3159	True;True;True	747;771;3395	1845;1899;8733;8734	1608;1651;7770;7771
Q9D6Z1	Q9D6Z1	14	14	14	Nucleolar protein 56	Nop56	sp|Q9D6Z1|NOP56_MOUSE Nucleolar protein 56 OS=Mus musculus OX=10090 GN=Nop56 PE=1 SV=2	1	14	14	14	9	14	9	14	9	14	31.9	31.9	31.9	64.464	580	580	0	169.22	By MS/MS	By MS/MS	18.4	31.9	819360000	200810000	618560000	26431000	6477700	19953000	229660000	378260000	8	16	24				627	353;802;1230;1774;2129;2312;2506;2606;2607;2806;2942;4538;4655;4717	True;True;True;True;True;True;True;True;True;True;True;True;True;True	384;859;1317;1890;2265;2459;2667;2770;2771;2987;3154;3155;4849;4972;5040	955;2112;2113;3213;3214;4682;4683;5712;6303;6798;6799;6800;6801;7098;7099;7100;7101;7647;8106;8107;8108;8109;8110;8111;12462;12463;12744;12745;12896;12897	826;1831;2817;2818;4133;4134;5075;5608;6040;6041;6042;6043;6370;6371;6372;6373;6833;7232;7233;7234;11049;11297;11298;11431;11432
Q9D773	Q9D773	3	3	3	39S ribosomal protein L2, mitochondrial	Mrpl2	sp|Q9D773|RM02_MOUSE 39S ribosomal protein L2, mitochondrial OS=Mus musculus OX=10090 GN=Mrpl2 PE=1 SV=1	1	3	3	3	1	3	1	3	1	3	17.3	17.3	17.3	33.34	306	306	0	26.821	By matching	By MS/MS	10.1	17.3	36908000	4218800	32689000	2460500	281250	2179300	0	21838000	0	3	3				628	151;2881;4584	True;True;True	162;3067;4896	401;7904;7905;12578	347;7063;11155
Q9D7H3	Q9D7H3	2	2	2	RNA 3-terminal phosphate cyclase	RtcA	sp|Q9D7H3|RTCA_MOUSE RNA 3-terminal phosphate cyclase OS=Mus musculus OX=10090 GN=RtcA PE=1 SV=2	1	2	2	2	2	2	2	2	2	2	9	9	9	39.254	366	366	0	10.672	By MS/MS	By MS/MS	9	9	17552000	7122600	10429000	923790	374880	548910	0	6967400	1	1	2				629	139;631	True;True	150;675	372;373;1657;1658	321;322;1435
Q9D7N3	Q9D7N3	5	5	5	28S ribosomal protein S9, mitochondrial	Mrps9	sp|Q9D7N3|RT09_MOUSE 28S ribosomal protein S9, mitochondrial OS=Mus musculus OX=10090 GN=Mrps9 PE=1 SV=3	1	5	5	5	4	5	4	5	4	5	17.2	17.2	17.2	44.929	390	390	0	40.814	By MS/MS	By MS/MS	13.8	17.2	199500000	58171000	141320000	7672900	2237300	5435600	68902000	83681000	3	4	7				630	194;1005;2634;2734;3466	True;True;True;True;True	211;1073;2802;2911;3720	526;2628;2629;7173;7174;7437;7438;9609;9610	460;2285;6439;6662;6663;8525;8526
Q9D7S7	Q9D7S7	5	3	3	60S ribosomal protein L22-like 1	Rpl22l1	sp|Q9D7S7|RL22L_MOUSE 60S ribosomal protein L22-like 1 OS=Mus musculus OX=10090 GN=Rpl22l1 PE=1 SV=1	1	5	3	3	4	4	2	2	2	2	46.7	39.3	39.3	14.467	122	122	0	38.615	By MS/MS	By MS/MS	27	36.9	1390100000	967260000	422820000	347520000	241810000	105710000	903600000	341930000	2	5	7				631	1148;2215;3088;3901;4514	True;False;False;True;True	1221;2358;3315;4179;4824	2961;2962;2963;5986;5987;5988;5989;8539;8540;8541;8542;10778;10779;10780;10781;12410	2598;2599;2600;5321;5322;7613;7614;7615;9520;9521;9522;9523;11003
Q9D823	Q9D823	2	2	2	60S ribosomal protein L37	Rpl37	sp|Q9D823|RL37_MOUSE 60S ribosomal protein L37 OS=Mus musculus OX=10090 GN=Rpl37 PE=3 SV=3	1	2	2	2	2	1	2	1	2	1	20.6	20.6	20.6	11.078	97	97	0	13.908	By MS/MS	By MS/MS	20.6	12.4	255700000	242580000	13114000	85232000	80861000	4371200	242330000	9017300	2	1	3				632	1649;1676	True;True	1752;1783	4251;4252;4253;4254;4358	3722;3723;3724;3829
Q9D880	Q9D880	2	2	2	Mitochondrial import inner membrane translocase subunit TIM50	Timm50	sp|Q9D880|TIM50_MOUSE Mitochondrial import inner membrane translocase subunit TIM50 OS=Mus musculus OX=10090 GN=Timm50 PE=1 SV=1	1	2	2	2	1	2	1	2	1	2	7.6	7.6	7.6	39.776	353	353	0	16.606	By matching	By MS/MS	3.1	7.6	22442000	9420600	13021000	1320100	554150	765950	0	8698900	0	2	2				633	1971;3922	True;True	2099;4200	5290;10836;10837	4692;9590
Q9D8B4	Q9D8B4	2	2	2	NADH dehydrogenase [ubiquinone] 1 alpha subcomplex subunit 11	Ndufa11	sp|Q9D8B4|NDUAB_MOUSE NADH dehydrogenase [ubiquinone] 1 alpha subcomplex subunit 11 OS=Mus musculus OX=10090 GN=Ndufa11 PE=1 SV=2	1	2	2	2	0	2	0	2	0	2	24.1	24.1	24.1	14.982	141	141	0	13.618		By MS/MS	0	24.1	29436000	0	29436000	4205100	0	4205100	0	19665000	0	1	1				634	907;2413	True;True	970;2568	2384;6574	2073;5839
Q9D8E6	Q9D8E6	40	40	40	60S ribosomal protein L4	Rpl4	sp|Q9D8E6|RL4_MOUSE 60S ribosomal protein L4 OS=Mus musculus OX=10090 GN=Rpl4 PE=1 SV=3	1	40	40	40	40	34	40	34	40	34	55.1	55.1	55.1	47.153	419	419	0	323.31	By MS/MS	By MS/MS	55.1	54.7	195910000000	124700000000	71213000000	12245000000	7793700000	4450800000	127610000000	42949000000	86	67	153				635	53;54;331;332;800;801;1094;1095;1347;1404;1405;1520;1793;1794;1795;1933;2185;2186;2188;2216;2378;2379;2406;2538;2539;2922;3018;3092;3153;3180;3181;3303;3373;3452;3538;3676;3947;3948;4316;4616	True;True;True;True;True;True;True;True;True;True;True;True;True;True;True;True;True;True;True;True;True;True;True;True;True;True;True;True;True;True;True;True;True;True;True;True;True;True;True;True	55;56;360;361;857;858;1163;1164;1438;1498;1499;1619;1909;1910;1911;2054;2325;2326;2328;2359;2531;2532;2561;2701;2702;3123;3124;3125;3242;3319;3389;3416;3417;3545;3620;3704;3802;3803;3946;3947;4226;4227;4614;4930;4931	113;114;115;116;117;118;902;903;904;905;906;907;908;909;910;911;912;913;914;915;2108;2109;2110;2111;2825;2826;2827;2828;3514;3652;3653;3654;3655;3656;3657;3658;3659;3660;3661;3949;3950;3951;3952;4738;4739;4740;4741;4742;4743;4744;4745;4746;4747;4748;4749;4750;4751;5141;5142;5143;5144;5883;5884;5885;5886;5887;5888;5893;5894;5895;5896;5990;5991;6492;6493;6494;6495;6496;6562;6563;6878;6879;6880;6881…	96;97;98;99;100;101;773;774;775;776;777;778;779;780;781;782;783;784;785;786;787;788;789;790;1828;1829;1830;2457;2458;2459;2460;2461;2462;3076;3194;3195;3196;3197;3198;3199;3200;3201;3202;3203;3461;3462;3463;3464;4185;4186;4187;4188;4189;4190;4191;4192;4193;4194;4195;4196;4197;4198;4199;4200;4539;4540;5234;5235;5236;5237;5238;5239;5240;5244;5245;5246;5247;5323;5324;5767;5768;5769;5770;5828;5829;61…
Q9D8N0	Q9D8N0	3	3	3	Elongation factor 1-gamma	Eef1g	sp|Q9D8N0|EF1G_MOUSE Elongation factor 1-gamma OS=Mus musculus OX=10090 GN=Eef1g PE=1 SV=3	1	3	3	3	3	3	3	3	3	3	8	8	8	50.06	437	437	0	26.8	By MS/MS	By MS/MS	8	8	73767000	44912000	28855000	3073600	1871300	1202300	45467000	18721000	3	1	4				636	19;1928;4576	True;True;True	19;2049;4888	33;34;5132;5133;12561;12562	30;31;4532;11141
Q9D903	Q9D903	8	8	8	Probable rRNA-processing protein EBP2	Ebna1bp2	sp|Q9D903|EBP2_MOUSE Probable rRNA-processing protein EBP2 OS=Mus musculus OX=10090 GN=Ebna1bp2 PE=2 SV=1	1	8	8	8	7	8	7	8	7	8	35.3	35.3	35.3	34.702	306	306	0	68.221	By MS/MS	By MS/MS	27.1	35.3	571040000	229480000	341560000	38069000	15299000	22771000	244030000	213630000	8	11	19				637	1023;1372;1474;2097;2290;2402;2500;3204	True;True;True;True;True;True;True;True	1092;1464;1568;2231;2436;2557;2661;3443	2682;2683;3564;3565;3566;3567;3832;3833;3834;3835;3836;5619;5620;6240;6241;6554;6781;6782;8846;8847	2335;2336;3116;3117;3118;3119;3361;3362;3363;3364;4993;4994;5545;5546;5817;6024;6025;7874;7875
Q9D937	Q9D937	2	2	2	Uncharacterized protein C11orf98 homolog		sp|Q9D937|CK098_MOUSE Uncharacterized protein C11orf98 homolog OS=Mus musculus OX=10090 PE=1 SV=1	1	2	2	2	2	2	2	2	2	2	22.8	22.8	22.8	14.098	123	123	0	19.077	By matching	By MS/MS	22.8	22.8	225990000	59747000	166240000	37665000	9957800	27707000	61098000	109710000	0	3	3				638	336;3335	True;True	365;3579	921;922;9174;9175;9176;9177	796;8156;8157
Q9D945	Q9D945	4	4	4	Protein LLP homolog	Llph	sp|Q9D945|LLPH_MOUSE Protein LLP homolog OS=Mus musculus OX=10090 GN=Llph PE=1 SV=1	1	4	4	4	3	4	3	4	3	4	29.2	29.2	29.2	15.391	130	130	0	46.312	By MS/MS	By MS/MS	29.2	29.2	229820000	48657000	181170000	45965000	9731400	36233000	53463000	107250000	4	7	11				639	727;3973;4178;4179	True;True;True;True	781;4253;4470;4471;4472	1917;1918;1919;1920;10963;10964;10965;11554;11555;11556;11557;11558;11559;11560	1663;1664;1665;9702;9703;9704;10248;10249;10250;10251;10252
Q9DAK9	Q9DAK9	2	2	2	14 kDa phosphohistidine phosphatase	Phpt1	sp|Q9DAK9|PHP14_MOUSE 14 kDa phosphohistidine phosphatase OS=Mus musculus OX=10090 GN=Phpt1 PE=1 SV=1	1	2	2	2	1	2	1	2	1	2	25	25	25	13.996	124	124	0	13.58	By matching	By MS/MS	9.7	25	65455000	33512000	31943000	7272800	3723600	3549200	0	21340000	0	3	3				640	7;4262	True;True	7;4557	8;9;11776;11777	7;8;10445
Q9DB15	Q9DB15	5	5	5	39S ribosomal protein L12, mitochondrial	Mrpl12	sp|Q9DB15|RM12_MOUSE 39S ribosomal protein L12, mitochondrial OS=Mus musculus OX=10090 GN=Mrpl12 PE=1 SV=2	1	5	5	5	5	5	5	5	5	5	24.9	24.9	24.9	21.708	201	201	0	35.054	By MS/MS	By MS/MS	24.9	24.9	839170000	230040000	609130000	119880000	32863000	87019000	230320000	406660000	2	4	6				641	26;2209;2814;3164;3495	True;True;True;True;True	26;2351;2995;3400;3753	49;50;5968;5969;7708;7709;8744;8745;9689;9690	43;44;5305;6889;7781;7782;8594;8595
Q9DB20	Q9DB20	7	7	7	ATP synthase subunit O, mitochondrial	Atp5o	sp|Q9DB20|ATPO_MOUSE ATP synthase subunit O, mitochondrial OS=Mus musculus OX=10090 GN=Atp5po PE=1 SV=1	1	7	7	7	5	7	5	7	5	7	48.8	48.8	48.8	23.363	213	213	0	67.479	By MS/MS	By MS/MS	31.9	48.8	581400000	123210000	458190000	48450000	10268000	38182000	135890000	283020000	4	9	13				642	1239;1348;2480;2841;3512;4476;4622	True;True;True;True;True;True;True	1326;1439;2639;2640;3024;3772;4784;4937	3227;3515;3516;6734;6735;7780;7781;7782;9728;9729;12332;12333;12674;12675	2829;3077;3078;5985;5986;6951;6952;6953;8624;10939;10940;11235;11236
Q9DB77	Q9DB77	3	3	3	Cytochrome b-c1 complex subunit 2, mitochondrial	Uqcrc2	sp|Q9DB77|QCR2_MOUSE Cytochrome b-c1 complex subunit 2, mitochondrial OS=Mus musculus OX=10090 GN=Uqcrc2 PE=1 SV=1	1	3	3	3	0	3	0	3	0	3	10.6	10.6	10.6	48.234	453	453	0	28.415		By MS/MS	0	10.6	50589000	0	50589000	2662600	0	2662600	0	33796000	0	3	3				643	1873;2685;4048	True;True;True	1991;2862;4330	4953;7327;11165	4370;6569;9887
Q9DBE9	Q9DBE9	4	4	4	pre-rRNA processing protein FTSJ3	Ftsj3	sp|Q9DBE9|SPB1_MOUSE pre-rRNA processing protein FTSJ3 OS=Mus musculus OX=10090 GN=Ftsj3 PE=1 SV=1	1	4	4	4	4	1	4	1	4	1	9.3	9.3	9.3	95.531	838	838	0	27.654	By MS/MS	By matching	9.3	2	64743000	59583000	5159500	1849800	1702400	147410	59583000	0	4	0	4				644	65;370;1257;1918	True;True;True;True	67;403;1345;2039	142;1006;3282;5096;5097	126;875;2879;4505
Q9DBG6	Q9DBG6	8	8	8	Dolichyl-diphosphooligosaccharide--protein glycosyltransferase subunit 2	Rpn2	sp|Q9DBG6|RPN2_MOUSE Dolichyl-diphosphooligosaccharide--protein glycosyltransferase subunit 2 OS=Mus musculus OX=10090 GN=Rpn2 PE=1 SV=1	1	8	8	8	2	8	2	8	2	8	17	17	17	69.062	631	631	0	54.935	By MS/MS	By MS/MS	4.4	17	137700000	23331000	114370000	5986900	1014400	4972500	32671000	67064000	1	7	8				645	826;2213;2723;2756;2991;3100;3905;4024	True;True;True;True;True;True;True;True	886;2356;2900;2933;3211;3330;4183;4305	2193;5984;7402;7403;7486;7487;8249;8250;8583;10786;11119	1911;5319;6631;6632;6701;7350;7351;7649;9528;9849
Q9DBJ1;O70250	Q9DBJ1	5;2	5;2	5;2	Phosphoglycerate mutase 1	Pgam1	sp|Q9DBJ1|PGAM1_MOUSE Phosphoglycerate mutase 1 OS=Mus musculus OX=10090 GN=Pgam1 PE=1 SV=3	2	5	5	5	3	5	3	5	3	5	31.9	31.9	31.9	28.832	254	254;253	0	47.725	By MS/MS	By MS/MS	20.5	31.9	296350000	56015000	240340000	22796000	4308900	18487000	72300000	134020000	1	6	7				646	1232;1744;3810;4358;4612	True;True;True;True;True	1319;1859;4082;4083;4657;4926	3216;3217;4596;4597;10523;10524;10525;12022;12642;12643	2820;2821;4044;9303;9304;10668;11207;11208
Q9DBY8	Q9DBY8	14	14	14	Nuclear valosin-containing protein-like	Nvl	sp|Q9DBY8|NVL_MOUSE Nuclear valosin-containing protein-like OS=Mus musculus OX=10090 GN=Nvl PE=1 SV=1	1	14	14	14	8	14	8	14	8	14	22.9	22.9	22.9	94.475	855	855	0	101.55	By MS/MS	By MS/MS	12.7	22.9	395390000	99074000	296320000	8237400	2064000	6173300	118490000	178540000	4	11	15				647	430;1015;1111;1521;2176;2238;2453;3119;3759;3969;3970;4124;4297;4393	True;True;True;True;True;True;True;True;True;True;True;True;True;True	464;1084;1181;1620;2316;2381;2611;3353;4031;4249;4250;4414;4593;4694	1122;1123;2664;2665;2875;3953;5861;6064;6065;6670;6671;8640;10405;10406;10953;10954;10955;10956;10957;10958;11398;11857;12112;12113	970;971;2319;2512;3465;5217;5391;5931;7698;9209;9694;9695;9696;9697;10106;10510;10746
Q9DC69	Q9DC69	4	4	4	NADH dehydrogenase [ubiquinone] 1 alpha subcomplex subunit 9, mitochondrial	Ndufa9	sp|Q9DC69|NDUA9_MOUSE NADH dehydrogenase [ubiquinone] 1 alpha subcomplex subunit 9, mitochondrial OS=Mus musculus OX=10090 GN=Ndufa9 PE=1 SV=2	1	4	4	4	2	4	2	4	2	4	20.2	20.2	20.2	42.525	377	377	0	33.416	By MS/MS	By MS/MS	8	20.2	47994000	6309100	41684000	1919700	252360	1667400	8459300	25697000	2	5	7				648	1860;2990;3755;3777	True;True;True;True	1977;3210;4027;4049	4912;8247;8248;10395;10396;10445;10446	4333;7348;7349;9200;9201;9240;9241
Q9DC71	Q9DC71	7	7	7	28S ribosomal protein S15, mitochondrial	Mrps15	sp|Q9DC71|RT15_MOUSE 28S ribosomal protein S15, mitochondrial OS=Mus musculus OX=10090 GN=Mrps15 PE=1 SV=2	1	7	7	7	7	6	7	6	7	6	29.8	29.8	29.8	29.463	258	258	0	50.09	By MS/MS	By MS/MS	29.8	26.4	231520000	69221000	162300000	13619000	4071800	9546900	56193000	121450000	3	5	8				649	936;1071;1947;2043;3215;3320;3963	True;True;True;True;True;True;True	1000;1140;2069;2174;3454;3563;4243	2464;2465;2466;2467;2772;2773;5170;5171;5467;8874;8875;9141;9142;10942;10943	2149;2150;2409;4565;4848;7899;8131;9687;9688
Q9DCA2	Q9DCA2	3	3	3	28S ribosomal protein S11, mitochondrial	Mrps11	sp|Q9DCA2|RT11_MOUSE 28S ribosomal protein S11, mitochondrial OS=Mus musculus OX=10090 GN=Mrps11 PE=1 SV=2	1	3	3	3	1	3	1	3	1	3	29.8	29.8	29.8	20.208	191	191	0	57.048	By matching	By MS/MS	8.9	29.8	70668000	14292000	56377000	7066800	1429200	5637700	0	37663000	0	3	3				650	428;1235;2149	True;True;True	462;1322;2286	1119;3220;5763;5764	968;2824;5128
Q9DCA5	Q9DCA5	9	9	9	Ribosome biogenesis protein BRX1 homolog	Brix1	sp|Q9DCA5|BRX1_MOUSE Ribosome biogenesis protein BRX1 homolog OS=Mus musculus OX=10090 GN=Brix1 PE=1 SV=3	1	9	9	9	6	9	6	9	6	9	32.6	32.6	32.6	41.241	353	353	0	79.565	By MS/MS	By MS/MS	23.2	32.6	483300000	169710000	313590000	24165000	8485600	15680000	196770000	182440000	6	9	15				651	490;842;1199;1276;1567;1930;3182;3710;3936	True;True;True;True;True;True;True;True;True	528;903;1282;1365;1667;2051;3418;3982;4215	1275;1276;2222;3112;3113;3114;3115;3334;3335;4061;5135;5136;8790;10260;10261;10875;10876;10877;10878	1106;1935;2730;2731;2732;2733;2925;2926;3551;4534;4535;7825;9084;9085;9622;9623;9624
Q9DCD0	Q9DCD0	3	3	3	6-phosphogluconate dehydrogenase, decarboxylating	Pgd	sp|Q9DCD0|6PGD_MOUSE 6-phosphogluconate dehydrogenase, decarboxylating OS=Mus musculus OX=10090 GN=Pgd PE=1 SV=3	1	3	3	3	3	3	3	3	3	3	9.9	9.9	9.9	53.247	483	483	0	20.106	By MS/MS	By MS/MS	9.9	9.9	100570000	28735000	71835000	4372600	1249300	3123300	29629000	47096000	1	3	4				652	174;1427;2832	True;True;True	188;1521;3013	462;463;3703;3704;7755;7756;7757;7758	403;3233;3234;6930;6931
Q9DCJ5	Q9DCJ5	2	2	2	NADH dehydrogenase [ubiquinone] 1 alpha subcomplex subunit 8	Ndufa8	sp|Q9DCJ5|NDUA8_MOUSE NADH dehydrogenase [ubiquinone] 1 alpha subcomplex subunit 8 OS=Mus musculus OX=10090 GN=Ndufa8 PE=1 SV=3	1	2	2	2	1	2	1	2	1	2	12.2	12.2	12.2	19.992	172	172	0	11.6	By matching	By MS/MS	7.6	12.2	23465000	3183300	20281000	2607200	353690	2253500	0	13549000	0	2	2				653	1102;2489	True;True	1171;2649	2843;6748;6749	2479;5996
Q9DCS9	Q9DCS9	2	2	2	NADH dehydrogenase [ubiquinone] 1 beta subcomplex subunit 10	Ndufb10	sp|Q9DCS9|NDUBA_MOUSE NADH dehydrogenase [ubiquinone] 1 beta subcomplex subunit 10 OS=Mus musculus OX=10090 GN=Ndufb10 PE=1 SV=3	1	2	2	2	1	2	1	2	1	2	19.3	19.3	19.3	21.024	176	176	0	46.168	By matching	By MS/MS	10.8	19.3	39580000	5425200	34155000	3958000	542520	3415500	0	22817000	0	2	2				654	561;4021	True;True	602;4302	1465;11109;11110	1272;9842
Q9DCT2	Q9DCT2	3	3	3	NADH dehydrogenase [ubiquinone] iron-sulfur protein 3, mitochondrial	Ndufs3	sp|Q9DCT2|NDUS3_MOUSE NADH dehydrogenase [ubiquinone] iron-sulfur protein 3, mitochondrial OS=Mus musculus OX=10090 GN=Ndufs3 PE=1 SV=2	1	3	3	3	2	3	2	3	2	3	14.8	14.8	14.8	30.149	263	263	0	22.903	By MS/MS	By MS/MS	10.6	14.8	58562000	9762100	48800000	3660100	610130	3050000	11037000	31327000	1	2	3				655	1115;2119;4510	True;True;True	1185;2255;4820	2881;5684;5685;12403;12404	2518;5053;10998
Q9DCU6	Q9DCU6	4	4	4	39S ribosomal protein L4, mitochondrial	Mrpl4	sp|Q9DCU6|RM04_MOUSE 39S ribosomal protein L4, mitochondrial OS=Mus musculus OX=10090 GN=Mrpl4 PE=1 SV=1	1	4	4	4	3	4	3	4	3	4	17.3	17.3	17.3	33.073	294	294	0	29.457	By MS/MS	By MS/MS	13.3	17.3	196820000	77524000	119300000	10935000	4306900	6627800	72357000	84866000	3	4	7				656	692;1533;1839;2386	True;True;True;True	745;1632;1956;2540	1841;1842;3985;4852;4853;4854;4855;6514;6515	1604;1605;3489;4284;4285;4286;5784
Q9DCW4	Q9DCW4	2	2	2	Electron transfer flavoprotein subunit beta	Etfb	sp|Q9DCW4|ETFB_MOUSE Electron transfer flavoprotein subunit beta OS=Mus musculus OX=10090 GN=Etfb PE=1 SV=3	1	2	2	2	0	2	0	2	0	2	12.9	12.9	12.9	27.623	255	255	0	11.066		By MS/MS	0	12.9	24655000	0	24655000	1896600	0	1896600	0	16471000	0	1	1				657	1423;4485	True;True	1517;4793	3696;12349	3229;10953
Q9DCX2	Q9DCX2	5	5	5	ATP synthase subunit d, mitochondrial	Atp5h	sp|Q9DCX2|ATP5H_MOUSE ATP synthase subunit d, mitochondrial OS=Mus musculus OX=10090 GN=Atp5h PE=1 SV=3	1	5	5	5	4	5	4	5	4	5	45.3	45.3	45.3	18.749	161	161	0	45.957	By MS/MS	By MS/MS	39.8	45.3	410430000	63906000	346530000	37312000	5809600	31502000	72460000	222950000	2	7	9				658	320;1981;2347;3472;3808	True;True;True;True;True	348;2109;2497;3726;4080	873;874;5310;5311;5312;5313;6390;6391;6392;9622;9623;10518	750;4714;4715;4716;5675;5676;8536;8537;9299
Q9EP89	Q9EP89	8	8	8	Serine beta-lactamase-like protein LACTB, mitochondrial	Lactb	sp|Q9EP89|LACTB_MOUSE Serine beta-lactamase-like protein LACTB, mitochondrial OS=Mus musculus OX=10090 GN=Lactb PE=1 SV=1	1	8	8	8	6	8	6	8	6	8	19.2	19.2	19.2	60.705	551	551	0	52.914	By MS/MS	By MS/MS	12.3	19.2	531750000	149210000	382540000	21270000	5968300	15302000	158250000	239970000	3	9	12				659	1119;1142;1291;2604;2830;2856;3649;4567	True;True;True;True;True;True;True;True	1189;1214;1215;1380;2768;3011;3039;3918;4879	2887;2888;2950;2951;2952;3375;3376;7093;7094;7095;7096;7751;7752;7820;10101;12544;12545	2522;2523;2590;2591;2963;2964;6366;6367;6368;6928;6985;8951;11128
Q9EPA7;Q9HAN9	Q9EPA7	9;2	9;2	9;2	Nicotinamide/nicotinic acid mononucleotide adenylyltransferase 1	Nmnat1	sp|Q9EPA7|NMNA1_MOUSE Nicotinamide/nicotinic acid mononucleotide adenylyltransferase 1 OS=Mus musculus OX=10090 GN=Nmnat1 PE=1 SV=2	2	9	9	9	7	9	7	9	7	9	35.4	35.4	35.4	32.355	285	285;279	0	132.96	By MS/MS	By MS/MS	30.2	35.4	533750000	191640000	342110000	31397000	11273000	20124000	194310000	225870000	3	9	12				660	1158;1425;1426;1639;1718;1879;2962;3120;4704	True;True;True;True;True;True;True;True;True	1232;1519;1520;1741;1831;1997;3181;3354;5026	2985;2986;3699;3700;3701;3702;4219;4515;4516;4517;4518;4962;4963;8173;8174;8641;12863;12864	2616;3231;3232;3684;3977;3978;3979;4378;7284;7285;7699;11405;11406
Q9EPU0;Q98TR3;Q9FJR0;Q6ZQJ5	Q9EPU0;Q98TR3	49;30;2;1	49;30;2;1	49;30;2;1	Regulator of nonsense transcripts 1	Upf1	sp|Q9EPU0|RENT1_MOUSE Regulator of nonsense transcripts 1 OS=Mus musculus OX=10090 GN=Upf1 PE=1 SV=2;sp|Q98TR3|RENT1_TAKRU Putative regulator of nonsense transcripts 1 OS=Takifugu rubripes OX=31033 GN=rent1 PE=3 SV=1	4	49	49	49	43	49	43	49	43	49	55.2	55.2	55.2	123.97	1124	1124;1097;1254;1062	0	323.31	By MS/MS	By MS/MS	47.8	55.2	6286700000	2228400000	4058300000	108390000	38421000	69971000	2229200000	2694000000	35	62	97				661	91;147;298;312;475;484;556;558;576;606;650;783;902;1019;1021;1201;1246;1421;1511;2210;2543;2596;2643;2666;2715;2849;2872;2902;3075;3140;3183;3239;3256;3276;3298;3369;3563;3704;3716;3754;3816;3881;4060;4098;4109;4426;4571;4631;4665	True;True;True;True;True;True;True;True;True;True;True;True;True;True;True;True;True;True;True;True;True;True;True;True;True;True;True;True;True;True;True;True;True;True;True;True;True;True;True;True;True;True;True;True;True;True;True;True;True	96;158;324;340;513;522;597;599;617;650;694;839;965;1088;1090;1284;1333;1515;1609;2352;2706;2760;2812;2839;2892;3032;3056;3094;3095;3300;3374;3419;3480;3497;3517;3540;3616;3829;3830;3976;3988;4026;4089;4157;4342;4385;4399;4731;4883;4946;4982	224;225;392;393;394;395;810;811;847;848;849;850;1235;1236;1264;1265;1452;1459;1460;1498;1499;1582;1583;1709;1710;1711;1712;2070;2071;2072;2073;2376;2377;2670;2671;2676;2677;3118;3119;3241;3242;3243;3244;3693;3694;3927;3928;3929;3930;5970;5971;6894;6895;7075;7076;7077;7078;7198;7261;7262;7385;7386;7387;7388;7796;7797;7798;7799;7855;7856;7857;7858;7958;7959;7960;8504;8505;8679;8680;8791;8792;8935;8…	193;340;341;342;343;698;699;730;731;732;733;1068;1069;1097;1098;1262;1269;1304;1305;1372;1373;1479;1480;1481;1795;1796;1797;1798;2066;2324;2329;2330;2735;2843;2844;3227;3440;3441;3442;3443;5306;5307;6141;6351;6352;6353;6354;6460;6513;6514;6617;6618;6619;6620;6966;6967;6968;7017;7018;7101;7102;7103;7584;7726;7826;7953;7954;7955;7993;7994;8037;8085;8259;8260;8261;8262;8734;8735;8736;8737;8738;9072;…
Q9EQI8	Q9EQI8	4	4	4	39S ribosomal protein L46, mitochondrial	Mrpl46	sp|Q9EQI8|RM46_MOUSE 39S ribosomal protein L46, mitochondrial OS=Mus musculus OX=10090 GN=Mrpl46 PE=1 SV=1	1	4	4	4	4	4	4	4	4	4	16.3	16.3	16.3	32.131	283	283	0	31.723	By MS/MS	By MS/MS	16.3	16.3	142440000	39449000	102990000	8378800	2320500	6058300	42194000	66059000	1	5	6				662	209;271;2741;3069	True;True;True;True	227;294;2918;3294	568;569;745;746;7450;7451;7452;8495;8496	502;651;6672;6673;7575;7576
Q9EQK5	Q9EQK5	10	10	10	Major vault protein	Mvp	sp|Q9EQK5|MVP_MOUSE Major vault protein OS=Mus musculus OX=10090 GN=Mvp PE=1 SV=4	1	10	10	10	10	8	10	8	10	8	15.1	15.1	15.1	95.923	861	861	0	65.039	By MS/MS	By MS/MS	15.1	12.9	254190000	180380000	73812000	5648700	4008500	1640300	178610000	51082000	10	4	14				663	282;406;529;614;960;1529;1743;1797;2342;3509	True;True;True;True;True;True;True;True;True;True	305;440;569;658;1024;1628;1858;1914;2492;3769	765;766;1074;1369;1370;1606;1607;1608;1609;2528;2529;3971;3972;4595;4763;4764;6380;6381;9724;9725	664;931;1189;1397;1398;1399;2202;2203;3477;3478;4043;4213;5665;5666;8621
Q9ER88	Q9ER88	6	6	6	28S ribosomal protein S29, mitochondrial	Dap3	sp|Q9ER88|RT29_MOUSE 28S ribosomal protein S29, mitochondrial OS=Mus musculus OX=10090 GN=Dap3 PE=1 SV=1	1	6	6	6	4	5	4	5	4	5	19.9	19.9	19.9	44.699	391	391	0	43.91	By MS/MS	By MS/MS	12.3	16.9	202720000	69553000	133170000	8814100	3024000	5790000	68217000	90301000	1	5	6				664	855;1192;1566;2220;2966;3135	True;True;True;True;True;True	916;1272;1666;2363;3185;3369	2246;2247;3087;4059;4060;6004;6005;8178;8179;8668	1956;1957;2709;3550;5335;5336;7289;7719
Q9ERA6	Q9ERA6	2	2	2	Tuftelin-interacting protein 11	Tfip11	sp|Q9ERA6|TFP11_MOUSE Tuftelin-interacting protein 11 OS=Mus musculus OX=10090 GN=Tfip11 PE=1 SV=1	1	2	2	2	0	2	0	2	0	2	3	3	3	96.304	838	838	0	11.572		By MS/MS	0	3	6072700	0	6072700	129210	0	129210	0	4056900	0	2	2				665	80;2965	True;True	83;3184	193;8177	167;7288
Q9ERS2	Q9ERS2	3	3	3	NADH dehydrogenase [ubiquinone] 1 alpha subcomplex subunit 13	Ndufa13	sp|Q9ERS2|NDUAD_MOUSE NADH dehydrogenase [ubiquinone] 1 alpha subcomplex subunit 13 OS=Mus musculus OX=10090 GN=Ndufa13 PE=1 SV=3	1	3	3	3	2	3	2	3	2	3	20.8	20.8	20.8	16.859	144	144	0	18.56	By matching	By MS/MS	13.9	20.8	96682000	9887200	86795000	12085000	1235900	10849000	12794000	55077000	0	3	3				666	1755;2602;4242	True;True;True	1871;2766;4536	4639;4640;7089;7090;11721	4099;6364;10392
Q9ERU9	Q9ERU9	3	3	3	E3 SUMO-protein ligase RanBP2	Ranbp2	sp|Q9ERU9|RBP2_MOUSE E3 SUMO-protein ligase RanBP2 OS=Mus musculus OX=10090 GN=Ranbp2 PE=1 SV=2	1	3	3	3	3	1	3	1	3	1	1.2	1.2	1.2	341.12	3053	3053	0	17.013	By MS/MS	By matching	1.2	0.4	56515000	34305000	22209000	326670	198300	128380	34305000	0	2	0	2				667	2605;3778;4671	True;True;True	2769;4050;4988	7097;10447;10448;12773	6369;9242;11319
Q9EST5	Q9EST5	3	3	3	Acidic leucine-rich nuclear phosphoprotein 32 family member B	Anp32b	sp|Q9EST5|AN32B_MOUSE Acidic leucine-rich nuclear phosphoprotein 32 family member B OS=Mus musculus OX=10090 GN=Anp32b PE=1 SV=1	1	3	3	3	2	3	2	3	2	3	15.1	15.1	15.1	31.078	272	272	0	30.93	By MS/MS	By MS/MS	11.4	15.1	245860000	66241000	179620000	24586000	6624100	17962000	74683000	111550000	3	4	7				668	613;2321;3605	True;True;True	657;2468;3874	1605;6317;6318;6319;6320;10004;10005	1396;5620;5621;5622;5623;8860;8861
Q9ESV0;Q9GZR7	Q9ESV0	3;1	3;1	3;1	ATP-dependent RNA helicase DDX24	Ddx24	sp|Q9ESV0|DDX24_MOUSE ATP-dependent RNA helicase DDX24 OS=Mus musculus OX=10090 GN=Ddx24 PE=1 SV=2	2	3	3	3	3	2	3	2	3	2	5.1	5.1	5.1	96.428	857	857;859	0	21.673	By MS/MS	By MS/MS	5.1	3.3	61949000	43110000	18839000	1346700	937170	409550	39321000	16374000	3	1	4				669	618;1678;3986	True;True;True	662;1785;4267	1617;1618;4360;4361;10999	1406;3831;3832;9730
Q9ESX5;O60832;Q9LD90	Q9ESX5	12;5;1	12;5;1	12;5;1	H/ACA ribonucleoprotein complex subunit 4	Dkc1	sp|Q9ESX5|DKC1_MOUSE H/ACA ribonucleoprotein complex subunit DKC1 OS=Mus musculus OX=10090 GN=Dkc1 PE=1 SV=4	3	12	12	12	9	11	9	11	9	11	35.4	35.4	35.4	57.401	509	509;514;565	0	207.88	By MS/MS	By MS/MS	25.3	35.2	677400000	192420000	484980000	22580000	6413800	16166000	266070000	250340000	6	13	19				670	60;258;693;2228;2472;2497;3133;3134;3220;3824;3897;4153	True;True;True;True;True;True;True;True;True;True;True;True	62;281;746;2371;2630;2658;3367;3368;3459;4097;4175;4444	134;135;718;719;1843;1844;6038;6039;6040;6041;6717;6775;6776;8663;8664;8665;8666;8667;8880;8881;10554;10555;10556;10557;10558;10559;10772;11471	119;120;629;630;1606;1607;5369;5370;5371;5372;5973;6019;6020;7716;7717;7718;7904;9327;9328;9329;9516;10170
[truncated: 40 more rows]
[truncated: 3 more columns]

## Sheet: peptides
Sequence	N-term cleavage window	C-term cleavage window	Amino acid before	First amino acid	Second amino acid	Second last amino acid	Last amino acid	Amino acid after	A Count	R Count	N Count	D Count	C Count	Q Count	E Count	G Count	H Count	I Count	L Count	K Count	M Count	F Count	P Count	S Count	T Count	W Count	Y Count	V Count	U Count	O Count	Length	Missed cleavages	Mass	Proteins	Leading razor protein	Start position	End position	Gene names	Protein names	Unique (Groups)	Unique (Proteins)	Charges	PEP	Score	Identification type C0	Identification type H0	Experiment C0	Experiment H0	Intensity
[truncated: 4,295 more rows]
[truncated: 14 more columns]

[truncated: 1 more sheets: DEP analysis]
